# Supplementary material for: Long-Term Impact of Chemical and Alternative Fungicides Applied to Grapevine cv Nebbiolo on Berry Transcriptome
Source: MDPI journal article supplement (doi:10.3390/ijms21176067), 2020-08-23
Supplement: s1 [file s1]

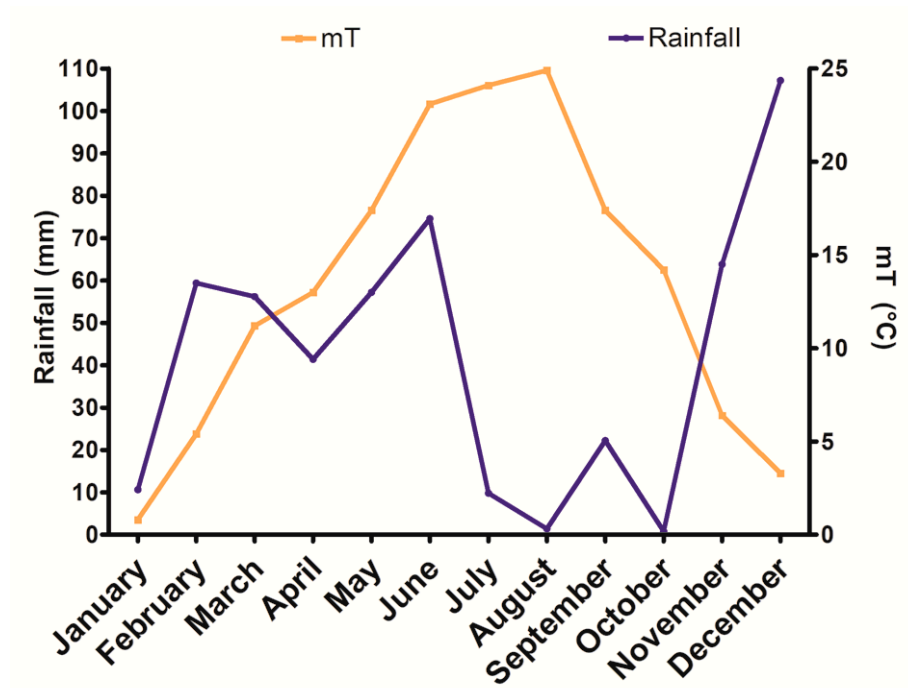

Figure S1. Climatic data.

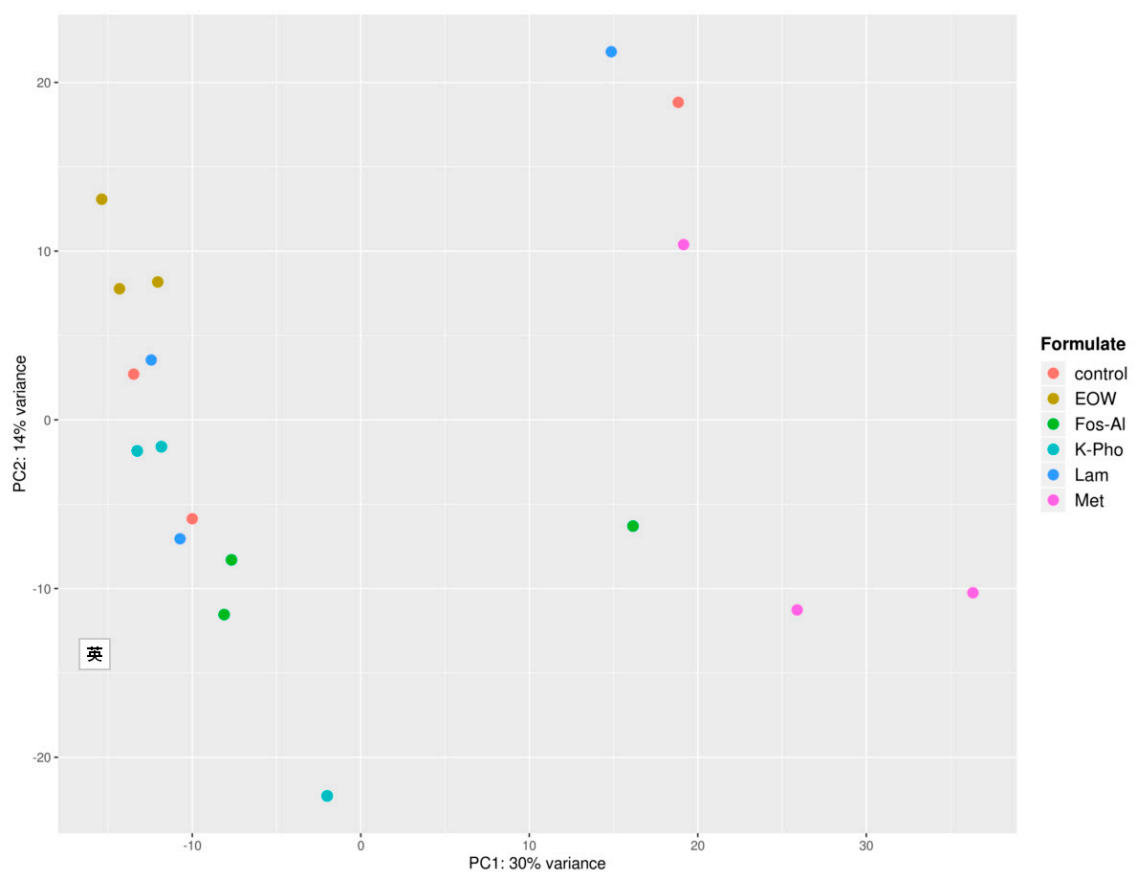

**Figure S2.** Sample Principal Component Analysis (PCA) plot for transformed data (log2 normalized counts), visualizing the overall effect of experimental covariates and batch effects in the different replicates of the several treatments: control, Fos-Al (Alette), K-Pho (Century), EOW (Electrolyzed water), Met (Polyram), Lam (Vacciplant).

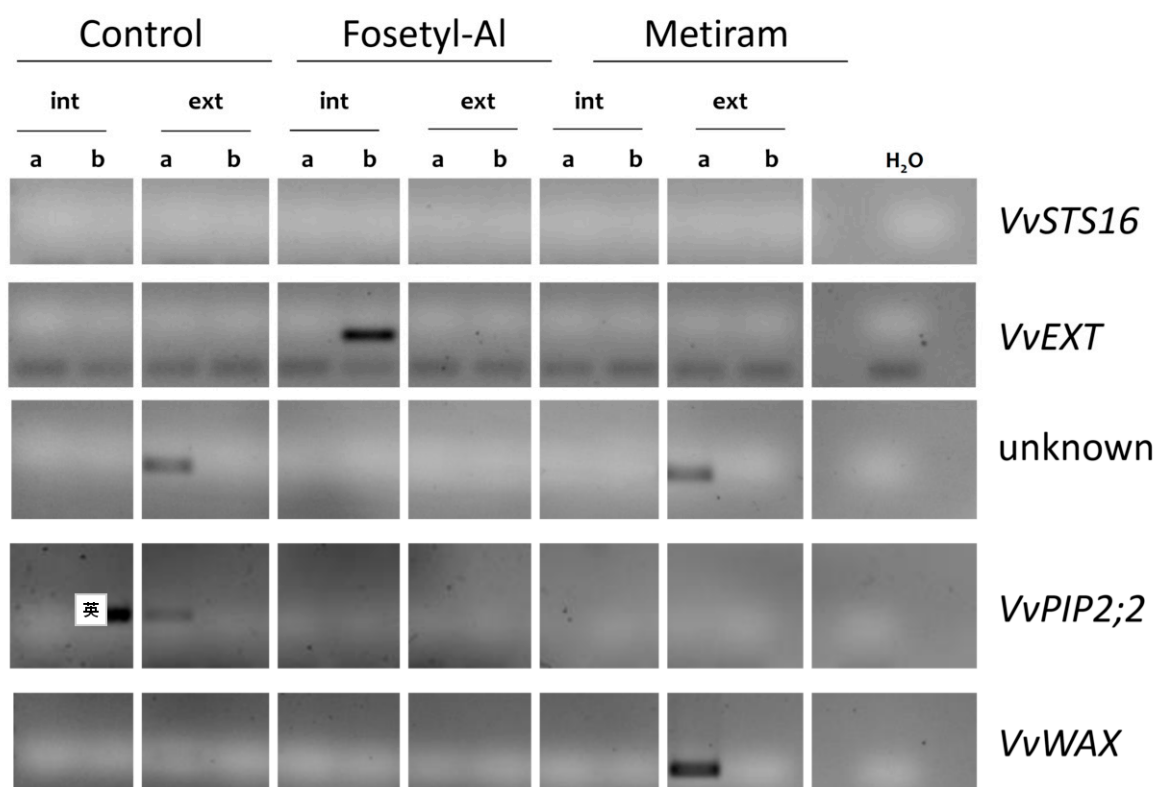

**Figure S3.** One-step RT-PCR analysis of microdissected cells using specific primers for *VvSTS16*, *VvEXT*, an unknown protein, *VvPIP2;2* and *VvWAX*.
