# Supplementary material for: Long-Term Impact of Chemical and Alternative Fungicides Applied to Grapevine cv Nebbiolo on Berry Transcriptome
Source: Int J Mol Sci. 2020 Aug 23;21(17):6067. doi: 10.3390/ijms21176067 (PMC7504522; doi:10.3390/ijms21176067)
Supplement: Supplementary file 1 [file ijms-21-06067-s001.zip › ijms-895140-supplementary_Revised.xlsx]

## Sheet: Table_S1
Table S1. Commercial name of tested products, composition, active ingredient and rate of application.
	Authors gratefully acknowledge Dr. Matteo Monchiero and Prof. Massimo Pugliese (Agroinnova, Centre of Competence for the Innovation in the Agro-Environmental Sector, University of Turin, Grugliasco, Italy) for the execution of the treatments in vineyard and for the pathological analyses as reported in Rantsiou et al., (2020)
	Treatment	Active ingredient	Dose a.i.	Days between applications	Period of application*	Number of applications
		(a. i.)	(g/ha)
	CTRL	Untreated control	-	-	-	-
	Fos-Al	Fosetyl-Al	2000	7-9	Till bunch closure	6
		Sulphur + Copper hydroxide	3200+600	7-9	From bunch closure to harvest	9
	K-Pho	Potassium phosphonate	3020	7-9	Till bunch closure	6
		Sulphur + Copper hydroxide	3200+600	7-9	From bunch closure to harvest	9
	Lam	Laminarin + metiram	90 + 1400	7-9	Till fruit set	7
		Laminarin + Copper hydroxide	90 + 600	7-9	From fruit set to harvest	8
	EOW	Electrolyzed water	10% solution	7-9	All growing season	15
	Met	Metiram	1400	7-9	Till fruit set	7
		Copper hydroxide	600	7-9	From fruit set to harvest	8
	Applications started on April 24th 2017 and ended on August 25th 2017. Bunch closure on June 7th 2017, fruit set on June 16th 2017. Modified from Rantsiou et al. (2020).
	Treatments and sampling were repeated in 2018.

## Sheet: Table_S2
Table S2. Raw and processed read counts per samples, with basic mapping statistics.
SampleName	sAccession	BiosampleAccession	Treatment	ReplicateNo.	RawReadNo.	ProcessedReadNo.	ReadLossPerc.	UniquelyMappedReadPerc.	Coverage
1A	SRR11109060	SAMN14123560	Control (naturally infected)	1	53972212	48486242	10.1644	91.96	7.82
1B	SRR11109059	SAMN14123561	Control (naturally infected)	2	48522622	44480640	8.3301	92.51	7.15
1C	SRR11109050	SAMN14123562	Control (naturally infected)	3	93692486	84660680	9.63984	92.47	13.35
4A	SRR11109049	SAMN14123563	fosetyl-Al	1	85588134	76804784	10.2623	92.63	12.17
4B	SRR11109048	SAMN14123564	fosetyl-Al	2	81612904	75551552	7.42695	92.55	12.1
4C	SRR11109047	SAMN14123565	fosetyl-Al	3	93886384	84680436	9.80541	92.52	13.38
5A	SRR11109046	SAMN14123566	laminarin	1	90752278	83582140	7.90078	92.92	13.12
5B	SRR11109045	SAMN14123567	laminarin	2	92901216	84653076	8.8784	91.65	13.5
5C	SRR11109044	SAMN14123568	laminarin	3	84388320	75811922	10.163	92.1	12.24
7A	SRR11109043	SAMN14123569	potassium phosphonate	1	54248292	48092944	11.3466	92.13	7.44
7B	SRR11109058	SAMN14123570	potassium phosphonate	2	58191826	53468572	8.1167	91.95	8.33
7C	SRR11109057	SAMN14123571	potassium phosphonate	3	64399036	58887542	8.55835	91.57	9.04
8A	SRR11109056	SAMN14123572	metiram	1	58001676	53772062	7.29223	92.2	8.38
8B	SRR11109055	SAMN14123573	metiram	2	52361722	48002320	8.32555	93.05	7.53
8C	SRR11109054	SAMN14123574	metiram	3	50085410	46026766	8.10345	92.3	7.14
10A	SRR11109053	SAMN14123575	electrolyzed water	1	53379160	48895252	8.40011	92.5	7.86
10B	SRR11109052	SAMN14123576	electrolyzed water	2	56621676	50772156	10.3309	91.5	8.08
10C	SRR11109051	SAMN14123577	electrolyzed water	3	63255262	58491946	7.53031	92.03	9.33
MAX					93886384	84680436	11.3466	93.05	13.5
MIN					48522622	44480640	7.29223	91.5	7.14
AVG					6.86589e+07	62506724	8.92086	92.2522	9.88667

## Sheet: Table_S3
Table S3. Mapped paired-reads count assigned to genomic features (genes) of V. vinifera. Only read pairs with both ends mapped and with mapping alignment quality score greater that 30 were considered.
	X1A	X1B	X1C	X4A	X4B	X4C	X5A	X5B	X5C	X7A	X7B	X7C	X8A	X8B	X8C	X10A	X10B	X10C
VIT_14s0060g00010	9	6	12	4	27	22	6	25	5	6	10	9	15	11	20	10	12	7
VIT_14s0060g00040	491	270	850	786	511	813	715	873	758	360	512	322	255	477	276	548	464	700
VIT_14s0060g00050	90	74	160	131	140	146	189	115	97	110	73	84	115	106	65	61	70	72
VIT_14s0060g00060	2888	2531	4737	3556	5696	5543	5356	5317	4885	3004	3385	3766	3636	2883	3690	3148	4113	3449
VIT_14s0060g00080	255	248	441	484	347	386	434	409	402	272	316	145	203	209	133	233	211	239
VIT_14s0060g00090	150	129	299	295	214	296	320	255	275	160	186	153	177	91	151	172	183	164
VIT_14s0060g00100	975	789	1542	1461	1878	2340	1985	1733	1970	1174	1414	1133	1413	1351	1173	1133	1251	1246
VIT_14s0060g00110	2979	2145	5483	3614	4416	5035	5559	5210	4680	2846	2999	2576	2681	2961	2270	3197	2953	3777
VIT_14s0060g00120	270	210	534	451	364	403	406	444	416	218	250	147	261	297	224	383	238	305
VIT_14s0060g00160	92	84	159	184	138	133	250	165	113	96	102	96	105	128	83	90	91	124
VIT_14s0060g00170	158	109	235	150	312	254	319	307	177	125	167	152	152	231	90	179	128	244
VIT_14s0060g00200	33	10	40	11	58	45	29	54	76	38	35	12	30	36	11	23	44	45
VIT_14s0060g00210	156	89	219	270	228	202	245	211	207	144	186	112	142	149	118	134	135	182
VIT_14s0060g00230	182	179	250	361	329	317	250	349	209	206	193	115	147	214	122	254	191	189
VIT_14s0060g00240	69	22	111	91	104	112	109	105	82	52	98	44	58	77	29	38	37	77
VIT_14s0060g00250	213	173	326	419	373	606	511	413	451	321	311	235	383	201	209	276	234	286
VIT_14s0060g00260	85	59	115	92	144	145	121	126	94	80	110	117	103	98	98	87	95	81
VIT_14s0060g00270	358	323	677	470	576	672	674	803	767	397	429	442	398	346	438	438	369	466
VIT_14s0060g00280	2641	3699	4702	8665	4629	5387	4841	4606	4159	3414	3130	8592	4562	2788	4903	2799	2719	2293
VIT_14s0060g00290	45	42	87	97	87	100	89	104	74	27	44	49	79	49	66	57	49	71
VIT_14s0060g00310	302	365	622	1609	884	749	899	1143	811	767	982	266	252	1256	228	950	401	762
VIT_14s0060g00320	618	508	948	982	896	1059	1045	935	953	540	661	649	726	628	613	561	656	701
VIT_14s0060g00340	77	83	116	115	90	99	169	72	79	69	69	45	67	80	41	67	59	51
VIT_14s0060g00350	82	92	293	171	176	210	221	251	266	129	115	78	105	91	85	133	98	173
VIT_14s0060g00360	2332	2309	4279	3388	3640	4517	4519	3992	3787	2205	2452	3008	2690	2245	2468	2340	2423	2763
VIT_14s0060g00370	846	458	1413	1063	1082	1485	1269	1509	1300	728	823	678	751	715	691	874	810	1188
VIT_14s0060g00380	230	156	389	336	347	419	312	372	316	222	250	290	258	201	235	197	264	282
VIT_14s0060g00390	161	145	314	335	349	301	469	224	274	172	243	213	261	230	150	188	204	231
VIT_14s0060g00400	115	87	143	69	297	235	231	268	202	86	163	90	193	175	115	186	188	206
VIT_14s0060g00410	4567	3553	7964	7625	6911	9429	8161	8632	8384	4432	5416	5709	4680	5152	4405	4985	5327	6300
VIT_14s0060g00420	950	784	1715	1443	1266	1908	1407	1764	1555	861	908	1209	1118	848	1152	868	950	1292
VIT_14s0060g00430	1214	1048	2094	2295	1927	2225	2310	1869	1922	1206	1284	1887	1716	905	1557	1049	1249	1569
VIT_14s0060g00440	269	213	454	357	384	416	415	384	431	216	309	266	228	169	165	272	240	327
VIT_14s0060g00450	51	24	80	48	48	63	118	64	72	20	54	30	43	41	26	33	68	63
VIT_14s0060g00460	199	129	304	237	244	383	307	316	329	214	255	146	201	165	162	213	241	300
VIT_14s0060g00470	32	14	45	54	51	33	48	32	30	27	25	22	28	27	32	23	29	36
VIT_14s0060g00480	21043	25491	40591	42389	54576	44174	50583	52475	40638	33498	45324	23981	23962	40866	23287	33102	25545	28817
VIT_14s0060g00540	9	19	46	30	44	31	35	35	43	21	49	43	31	21	12	16	42	20
VIT_14s0060g00550	6133	5381	10254	8047	6997	8378	9784	8351	7643	4888	5855	5693	5122	5926	4446	5167	5280	6638
VIT_14s0060g00570	426	180	667	354	615	584	589	876	688	316	395	219	251	324	178	436	440	635
VIT_14s0060g00580	3827	2605	6753	4421	5470	7087	5835	7664	6875	3977	4088	3485	3120	3964	3144	4144	4393	5701
VIT_14s0060g00590	1013	869	1839	1588	1566	1558	1949	1966	1843	1099	1195	734	658	1329	630	1311	1213	1442
VIT_14s0060g00600	5395	5714	10844	11538	9018	11322	10866	10005	9251	6232	6625	7977	6818	5797	6553	5837	6379	6802
VIT_14s0060g00610	424	299	731	459	599	737	646	734	725	342	464	303	374	437	356	457	452	597
VIT_14s0060g00620	265	161	374	263	379	393	437	488	324	211	308	217	129	398	166	300	244	369
VIT_14s0060g00630	3578	2870	6305	6239	4389	5838	6458	5399	4996	3102	3686	3854	3300	3646	3073	3228	3301	4006
VIT_14s0060g00640	905	644	1468	1017	1354	1629	1397	1609	1502	738	1068	709	809	1095	727	973	966	1218
VIT_14s0060g00650	119	117	192	188	210	126	260	186	184	106	115	112	103	124	100	98	119	109
VIT_14s0060g00670	64	38	73	54	89	87	88	107	88	66	76	51	47	69	64	57	69	75
VIT_14s0060g00690	11394	11181	18276	19863	13803	17904	21767	15956	13712	11380	12264	13990	12451	10683	9903	9917	10293	11637
VIT_14s0060g00710	117	210	188	229	144	153	187	182	158	96	123	94	89	108	81	119	95	107
VIT_14s0060g00720	731	550	1159	1268	1345	1266	912	1243	1012	756	712	1463	836	736	1160	665	822	677
VIT_14s0060g00760	28	54	45	115	100	71	63	57	28	46	41	161	129	32	106	22	48	25
VIT_14s0060g00770	19	20	28	53	42	40	25	26	14	28	40	97	37	9	52	20	9	12
VIT_14s0060g00790	62	88	99	345	225	155	156	114	75	117	66	481	351	65	347	54	105	50
VIT_14s0060g00810	438	499	488	1334	1182	759	665	811	548	622	437	1665	1046	332	1403	288	391	307
VIT_14s0060g00820	161	165	250	226	317	231	283	200	173	140	182	200	252	139	189	132	134	119
VIT_14s0060g00830	741	1042	1366	1520	975	1202	1327	1066	1087	741	790	857	777	812	724	683	682	752
VIT_14s0060g00840	461	374	906	720	665	834	842	775	743	471	519	489	450	459	345	453	443	536
VIT_14s0060g00850	43	32	52	85	80	69	94	65	67	52	50	51	40	38	75	44	45	36
VIT_14s0060g00860	1644	1312	2678	1990	2581	2698	2390	2614	2563	1383	1653	1568	1606	1653	1502	1602	1603	1910
VIT_14s0060g00870	48	50	93	76	74	113	96	82	108	48	54	35	67	47	55	66	79	73
VIT_14s0060g00880	45	22	98	28	80	86	74	125	101	39	64	34	43	63	43	44	40	90
VIT_14s0060g00890	96	81	186	156	129	149	129	142	101	79	107	89	59	109	90	85	89	123
VIT_14s0060g00900	671	1504	1157	1618	3834	1374	2997	1231	1058	990	1332	1717	1799	1432	1386	1233	1052	614
VIT_14s0060g00910	375	280	553	466	482	474	497	571	486	326	374	280	241	380	187	412	369	431
VIT_14s0060g00920	53	49	121	107	101	107	78	99	96	52	57	68	49	94	53	62	60	66
VIT_14s0060g00930	1536	1343	2645	2110	2532	2644	2769	2705	2310	1677	1723	1476	1691	1685	1138	1584	1461	1880
VIT_14s0060g00940	11	22	18	21	33	13	37	32	8	13	10	6	2	10	6	14	14	8
VIT_14s0060g00950	32	32	78	24	75	82	78	98	77	54	50	25	43	32	46	57	62	72
VIT_14s0060g00970	168	180	255	282	245	199	270	224	218	128	160	120	102	177	113	126	146	168
VIT_14s0060g00980	202	188	300	366	242	229	356	299	227	170	161	143	133	168	106	185	167	190
VIT_14s0060g00990	18	43	51	71	70	75	98	56	46	26	35	31	33	59	25	59	32	49
VIT_14s0060g01010	4901	4485	7212	8328	5120	5751	8719	7384	5567	5561	4406	3689	3661	3198	2443	4192	3573	4484
VIT_14s0060g01030	47	31	66	45	107	91	78	78	85	37	58	71	82	48	84	40	57	53
VIT_14s0060g01080	898	489	1343	1037	1059	1170	1141	1262	1290	722	864	546	614	726	522	879	937	1119
VIT_14s0060g01100	1072	1092	1843	1649	1687	1610	1711	1670	1526	1137	1043	1192	1287	783	905	952	842	1026
VIT_14s0060g01120	235	203	354	296	315	332	467	395	353	219	334	124	164	269	143	274	264	286
VIT_14s0060g01140	2415	1982	4584	2957	3130	4227	3136	4314	4276	2165	2571	2121	2023	2845	2072	2678	2719	3647
VIT_14s0060g01150	609	494	906	820	942	918	977	936	776	506	629	476	530	602	320	540	557	674
VIT_14s0060g01160	1340	660	2416	1831	1972	2494	2059	2493	2622	1280	1488	1229	1226	1221	1279	1525	1576	2137
VIT_14s0060g01170	1930	3247	3590	4596	2827	3178	4818	2844	2531	1972	2187	2462	1974	2261	1847	1934	1735	1794
VIT_14s0060g01180	27	23	37	37	87	35	73	56	59	20	30	26	24	43	40	35	42	16
VIT_14s0060g01200	665	656	1030	974	706	1010	1052	944	912	642	654	625	516	577	532	542	547	616
VIT_14s0060g01210	1500	1488	3078	3708	2221	2493	3481	2742	2496	1817	2054	1713	1456	1835	1376	1753	1514	2229
VIT_14s0060g01220	29	14	50	19	46	46	55	46	47	19	34	13	15	44	19	44	37	21
VIT_14s0060g01230	759	447	1114	828	1269	1260	1130	1340	1173	678	837	418	652	745	445	865	805	945
VIT_14s0060g01240	47	13	33	37	81	54	59	66	48	18	29	45	31	27	31	43	18	51
VIT_14s0060g01250	225	232	395	407	341	373	525	331	290	205	212	255	224	311	196	194	227	221
VIT_14s0060g01260	144	147	264	227	208	252	199	221	187	152	142	107	97	152	112	166	149	133
VIT_14s0060g01270	41	44	59	79	85	77	83	72	62	46	49	67	50	44	49	42	44	45
VIT_14s0060g01280	8018	6939	13903	9386	10759	12208	9949	11988	11702	7094	8086	6320	7536	7218	5742	6970	7525	9267
VIT_14s0060g01290	5619	4889	9425	6026	7954	8412	9676	8504	7373	5062	5981	5295	5299	6456	4453	5078	5274	6513
VIT_14s0060g01300	362	361	459	308	287	304	362	282	191	295	221	166	196	249	77	245	191	267
VIT_14s0060g01320	450	384	427	379	407	349	394	378	254	301	297	257	310	274	155	271	254	348
VIT_14s0060g01330	112	98	208	161	253	226	191	251	192	121	178	157	170	135	141	134	130	119
VIT_14s0060g01340	4552	5718	8343	9364	8242	8632	9549	7530	6520	5093	6415	6231	6228	5964	5059	4564	4965	5165
VIT_14s0060g01360	155	173	334	186	381	421	268	336	423	178	206	179	225	223	269	181	294	237
VIT_14s0060g01370	386	473	667	638	592	621	850	608	574	378	404	347	385	448	306	397	413	488
VIT_14s0060g01390	1609	2057	3403	4568	2437	2773	4094	2587	2264	1615	2099	2182	1762	2026	1662	1481	1583	1699
VIT_14s0060g01400	108	60	116	35	233	158	146	203	141	89	104	84	79	138	59	143	109	117
VIT_14s0060g01410	49	50	104	88	102	111	121	108	88	78	66	47	50	90	42	72	50	59
VIT_14s0060g01420	30	43	38	62	93	48	74	59	18	31	41	30	37	31	17	55	43	34
VIT_14s0060g01430	117	124	176	147	338	236	274	184	171	154	183	142	198	146	119	141	145	123
VIT_14s0060g01440	286	280	436	453	468	474	555	499	402	277	340	297	290	373	208	316	249	321
VIT_14s0060g01450	319	174	309	271	379	373	407	411	316	220	202	213	281	157	175	241	187	280
VIT_14s0060g01460	272	211	415	347	340	381	342	438	322	255	253	203	250	217	169	248	190	236
VIT_14s0060g01470	264	169	364	318	375	326	521	511	625	364	257	253	173	203	147	365	237	295
VIT_14s0060g01490	3619	5076	5468	5476	4386	4499	6706	4295	3402	3330	3491	3416	3248	3017	2042	2796	2460	3008
VIT_14s0060g01510	7882	5982	14244	11535	11004	14620	13346	14736	12690	8232	9308	7747	7136	9750	5913	8700	8591	10967
VIT_14s0060g01520	102	79	132	122	158	132	236	159	118	90	99	68	64	132	63	111	105	134
VIT_14s0060g01530	615	573	1275	942	696	1282	787	994	970	559	546	725	664	571	566	578	587	787
VIT_14s0060g01540	1454	1291	2479	2177	1950	2375	2243	2462	2364	1508	1599	1544	1238	1455	1152	1412	1434	1780
VIT_14s0060g01550	2083	2019	3512	3066	3420	3543	3595	3434	3069	2139	2384	2559	2503	2313	2124	2143	2165	2642
VIT_14s0060g01560	1911	1155	3042	2103	2768	2909	3350	3188	2612	1762	1955	1499	1883	1456	1661	1798	1916	2505
VIT_14s0060g01580	1328	955	2153	1890	1783	2178	2558	1927	1713	1284	1436	1117	1347	1133	1074	1312	1204	1378
VIT_14s0060g01620	174	164	322	351	247	275	395	271	255	217	209	147	156	193	131	184	186	191
VIT_14s0060g01630	4512	3138	7623	4511	7396	8604	7459	8601	8186	4870	5037	3977	4865	4923	3962	5068	5308	6403
VIT_14s0060g01660	1738	1443	2503	2170	2159	2341	2920	2263	2039	1651	1574	1686	1462	1456	1168	1530	1639	1769
VIT_14s0060g01670	22	9	30	31	18	36	19	36	33	15	17	5	12	6	27	14	16	19
VIT_14s0060g01680	1972	1066	3045	2177	2786	3275	2567	3359	3107	1705	2115	2160	1967	1636	1785	1742	1921	2759
VIT_14s0060g01690	21	24	27	16	28	43	32	19	44	26	24	18	33	17	24	27	29	21
VIT_14s0060g01700	121	158	165	156	197	194	273	177	154	132	176	104	141	158	83	138	107	121
VIT_14s0060g01710	189	211	259	317	219	232	272	238	198	159	179	190	165	155	182	162	169	147
VIT_14s0060g01720	1364	1161	1969	1742	1837	1774	3213	1892	1584	1135	1486	1303	1281	1375	994	1111	1259	1404
VIT_14s0060g01730	599	488	956	1031	892	889	1516	812	751	563	689	627	565	578	437	535	504	683
VIT_14s0060g01740	656	546	1175	1021	907	1134	1132	1050	920	580	632	618	698	589	571	557	656	701
VIT_14s0060g01750	939	826	1758	1745	1340	1599	2008	1616	1518	921	960	1001	1006	856	776	920	899	1048
VIT_14s0060g01760	477	658	754	925	563	760	886	676	674	412	457	517	435	424	387	362	441	426
VIT_14s0060g01870	879	960	1899	2312	1208	1983	1783	1384	1158	942	870	1610	1197	903	1139	609	823	1122
VIT_14s0060g01880	154	238	364	519	257	481	398	298	252	234	242	303	268	234	249	154	174	180
VIT_14s0060g01910	12	9	37	5	14	10	6	16	6	0	8	0	8	6	7	3	18	16
VIT_14s0060g01920	736	784	1472	1503	1080	1239	1311	1128	1142	714	986	829	745	869	663	766	811	829
VIT_14s0060g01930	1326	1436	2198	2225	1796	1968	2098	1825	1514	1258	1337	1386	1383	1292	1095	1269	1182	1226
VIT_14s0060g01940	3	10	5	11	34	11	12	8	3	12	15	11	13	18	6	9	6	6
VIT_14s0060g01950	456	416	821	820	675	759	935	747	644	419	500	565	576	436	461	391	445	513
VIT_14s0060g01960	12	20	34	14	16	13	10	29	21	11	9	8	9	10	3	12	11	11
VIT_14s0060g01970	344	358	596	421	621	543	554	755	676	410	430	234	283	429	228	448	385	447
VIT_14s0060g01980	4360	3157	7331	5607	6538	8061	8199	6494	6149	3471	4002	5640	5622	3033	4941	3687	3794	5384
VIT_14s0060g01990	522	470	530	917	672	709	943	517	320	476	453	943	741	253	544	277	319	363
VIT_14s0060g02000	103	74	61	59	48	55	51	71	46	60	44	71	70	11	44	46	39	60
VIT_14s0060g02050	101	146	162	216	151	169	232	144	113	118	96	123	114	77	106	105	90	86
VIT_14s0060g02060	59	59	76	98	72	61	116	78	74	49	53	62	55	41	49	41	61	38
VIT_14s0060g02070	468	496	916	808	774	784	777	872	786	546	549	590	543	504	468	475	455	612
VIT_14s0060g02090	139	160	276	282	388	245	253	296	223	171	230	158	80	376	111	275	181	199
VIT_14s0060g02100	84	67	126	127	87	171	217	159	142	103	111	76	87	90	87	79	91	119
VIT_14s0060g02110	1522	2406	2447	2679	2132	2001	2372	2056	1756	1187	1662	1508	1391	1478	1149	1293	1260	1305
VIT_14s0060g02120	155	113	296	198	295	289	310	274	273	142	189	152	204	183	145	172	175	218
VIT_14s0060g02130	16	17	24	30	45	15	38	40	29	14	23	32	18	11	12	16	11	13
VIT_14s0060g02140	9447	9664	17038	21381	15947	14739	16318	15563	11960	10448	11148	15272	10567	9702	9813	9238	7932	9579
VIT_14s0060g02150	1058	1031	1614	2349	1328	1453	1596	1609	1219	1144	1096	1136	877	1006	635	938	613	985
VIT_14s0060g02160	942	808	1412	1334	1458	1664	1598	1441	1330	848	1032	918	1013	909	698	794	885	910
VIT_14s0060g02180	65	50	94	41	53	64	83	58	79	52	46	48	49	47	51	59	58	54
VIT_14s0060g02190	66	59	132	118	86	114	140	81	73	68	59	63	65	69	52	47	54	81
VIT_14s0060g02200	668	600	1215	968	952	1179	1168	1101	1017	656	657	589	579	755	566	755	659	810
VIT_14s0060g02210	363	297	691	434	603	658	575	694	678	359	379	322	336	402	314	473	439	458
VIT_14s0060g02220	718	849	1298	1269	1129	1387	1384	1249	1228	768	974	782	785	936	599	700	745	883
VIT_14s0060g02240	1898	2236	3730	3195	3020	3260	3065	3436	2820	1913	2289	2184	1866	2704	1830	1979	2006	2461
VIT_14s0060g02250	215	206	343	347	480	475	501	389	391	238	278	379	361	261	370	250	301	267
VIT_14s0060g02260	11248	11535	19432	17792	15562	18248	23139	17892	15371	11857	13156	11561	10723	12304	8836	11112	10947	12855
VIT_14s0060g02270	1982	2248	3178	3370	2828	2883	3620	2753	2335	2021	2062	2269	2168	2033	1652	1935	1902	1876
VIT_14s0060g02280	7057	7461	14158	13692	11951	14071	11884	13879	12516	7640	9093	9612	8248	8150	6824	7502	7908	8430
VIT_14s0060g02290	809	711	1126	1057	1265	1162	1606	1183	1045	707	801	769	847	879	651	732	837	896
VIT_14s0060g02300	2205	2034	3092	2724	2266	2416	3207	2172	1775	1496	1569	2218	2049	1123	1305	1287	1425	1538
VIT_14s0060g02310	1273	1654	1985	2399	1851	1703	2491	1782	1423	1217	1250	1218	1229	1288	900	1243	1096	1203
VIT_14s0060g02320	1139	680	2065	740	1771	519	1421	2195	2301	635	616	307	359	404	290	1937	1723	1427
VIT_14s0060g02340	171	74	208	162	448	219	386	182	163	129	102	134	244	101	141	130	139	150
VIT_14s0060g02350	712	414	954	841	893	1102	925	971	925	626	662	611	634	512	522	636	664	764
VIT_14s0060g02360	161	217	246	269	127	204	214	195	134	147	110	187	102	136	97	122	143	189
VIT_14s0060g02370	240	148	336	304	372	394	466	363	314	202	231	190	201	245	201	244	264	274
VIT_14s0060g02380	1130	864	1738	1386	1415	1538	1457	1610	1452	971	1179	789	939	1022	682	1054	1035	1208
VIT_14s0060g02390	1634	914	1921	2570	1807	1642	2533	2736	1909	1837	1368	1748	1108	1031	924	1439	857	1329
VIT_14s0060g02400	1600	1075	2881	1835	2495	3154	2165	3206	2982	1757	1985	1472	1378	1591	1198	1818	2021	2523
VIT_14s0060g02410	2949	2230	4927	4614	4839	4894	5199	5400	4808	2893	3299	3341	3084	3193	2557	3102	3086	3873
VIT_14s0060g02420	467	344	786	555	834	834	936	788	796	486	563	295	459	492	307	592	621	659
VIT_14s0060g02430	18	31	60	57	30	33	51	16	32	23	33	28	16	42	28	30	24	28
VIT_14s0060g02440	419	320	569	686	1005	608	922	713	502	504	808	712	545	466	550	491	533	537
VIT_14s0060g02630	206	51	243	196	107	273	214	196	142	185	211	56	51	49	44	82	162	266
VIT_14s0060g02640	466	312	671	438	844	850	704	891	851	433	521	442	503	477	395	455	479	595
VIT_14s0060g02670	13	5	24	10	34	20	22	15	8	14	16	10	16	5	6	14	15	13
VIT_14s0060g02680	593	500	911	937	850	930	954	872	797	491	729	509	591	584	435	519	566	755
VIT_14s0128g00010	28	21	43	25	53	42	43	57	34	29	25	15	28	31	15	25	27	44
VIT_14s0128g00020	183	180	367	299	213	275	317	304	294	143	213	73	113	194	77	182	202	249
VIT_14s0128g00040	120	43	263	159	120	167	150	150	158	81	100	77	59	65	65	113	75	116
VIT_14s0128g00050	48	58	93	89	134	132	116	78	107	47	61	105	106	56	110	49	82	56
VIT_14s0128g00060	9	12	24	33	10	26	19	13	12	10	8	32	9	18	11	8	15	16
VIT_14s0128g00070	16	9	31	27	27	35	26	20	23	15	26	24	19	20	18	15	26	24
VIT_14s0128g00080	104	117	253	222	133	251	206	218	210	105	103	216	194	124	158	100	134	172
VIT_14s0128g00100	353	340	615	592	730	742	660	648	583	391	525	542	563	449	510	414	397	418
VIT_14s0128g00110	5	5	8	7	22	17	14	24	12	6	5	22	18	6	20	5	12	3
VIT_14s0128g00120	9870	9060	16802	17917	17621	15607	20469	19825	16038	12097	13252	10292	11686	8975	7231	10926	11274	10938
VIT_14s0128g00150	308	264	489	511	525	547	583	464	390	299	396	387	413	274	265	252	248	393
VIT_14s0128g00160	64	76	126	85	150	107	148	120	127	79	111	70	59	82	67	96	87	129
VIT_14s0128g00170	120	96	184	170	175	174	186	167	141	107	125	122	98	82	80	112	125	118
VIT_14s0128g00180	1311	891	2317	1793	2393	1975	2193	2698	1956	1408	1496	1397	1275	1239	1121	1349	1285	1495
VIT_14s0128g00200	0	0	294	76	0	0	0	0	76	0	0	0	274	42	44	0	0	0
VIT_14s0128g00220	341	370	540	711	523	526	651	523	427	336	405	484	399	375	376	324	326	331
VIT_14s0128g00230	595	453	1055	772	969	1142	941	1093	1090	629	628	613	566	626	592	641	722	967
VIT_14s0128g00240	386	228	665	568	453	627	476	733	556	454	364	222	302	324	214	311	340	458
VIT_14s0128g00250	1924	2166	3744	3519	3460	3618	3833	3631	3179	2018	2285	2166	2325	2237	1979	2306	2129	2201
VIT_14s0128g00260	33	43	68	72	65	56	102	65	54	38	44	46	44	37	36	31	30	47
VIT_14s0128g00270	24	28	43	55	72	49	55	51	49	19	54	31	27	33	29	27	40	29
VIT_14s0128g00280	29	26	42	57	40	52	50	48	36	29	31	38	43	36	26	32	37	31
VIT_14s0128g00290	50	26	81	60	49	85	110	85	62	56	51	24	51	55	29	41	40	59
VIT_14s0128g00310	178	150	353	295	324	307	308	387	334	180	214	153	181	223	239	202	197	259
VIT_14s0128g00320	109	132	233	204	188	187	249	151	169	119	135	139	126	105	115	116	113	127
VIT_14s0128g00330	320	276	504	466	431	524	509	413	440	243	347	247	317	281	263	275	293	345
VIT_14s0128g00340	10	4	54	23	12	7	2	8	56	5	7	3	83	34	18	4	5	4
VIT_14s0128g00350	0	0	20	4	0	1	0	0	24	0	0	0	26	7	7	0	2	2
VIT_14s0128g00360	4018	2393	6662	5173	5832	7976	7053	7918	7305	4077	4514	3568	4378	3781	3317	4329	4784	6099
VIT_14s0128g00370	3582	2689	5529	4480	4555	5269	4446	5210	4379	3143	3830	2553	2615	3380	2103	3547	3304	4596
VIT_14s0128g00380	2194	2023	4009	3371	3014	3475	3344	3596	3183	1911	2176	2001	2014	2141	1697	2119	2012	2725
VIT_14s0128g00390	3016	3103	5475	5731	4832	4977	5805	5515	4349	3153	3436	3952	3151	2951	2796	2991	2985	3727
VIT_14s0128g00400	1609	1255	2878	2024	2368	2888	2665	3002	2707	1510	1766	1341	1383	1667	1197	1828	1753	2221
VIT_14s0128g00430	53	32	113	85	91	110	91	134	97	58	73	51	41	73	52	74	80	66
VIT_14s0128g00470	98	102	202	231	221	218	231	164	172	119	133	170	181	99	148	98	157	89
VIT_14s0128g00480	1755	1829	3260	2679	2741	3075	3573	3178	2864	1632	1986	1749	1789	2153	1625	1886	1970	2373
VIT_14s0128g00490	102	106	166	242	134	203	195	142	139	82	123	153	131	104	115	101	118	130
VIT_14s0128g00500	22	10	26	16	21	29	22	28	10	15	15	9	8	9	10	8	15	20
VIT_14s0128g00510	59	38	119	101	143	156	108	116	122	79	83	80	74	74	80	75	87	73
VIT_14s0128g00520	91	101	227	114	188	102	149	145	162	72	116	92	95	61	65	118	140	78
VIT_14s0128g00550	187	101	355	222	310	419	291	365	301	218	241	210	216	182	220	182	220	239
VIT_14s0128g00570	13	4	34	20	24	50	15	7	24	50	9	27	34	23	17	12	5	20
VIT_14s0128g00690	43	19	73	77	51	63	62	55	57	25	45	28	32	37	21	31	30	31
VIT_14s0128g00700	38	47	81	41	110	98	92	130	122	48	64	39	87	48	55	51	66	72
VIT_14s0128g00710	642	435	1150	878	1026	1160	915	1175	1133	645	739	756	760	599	562	674	715	853
VIT_14s0128g00720	831	472	1307	751	1339	1508	1286	1664	1469	694	1058	1087	977	917	957	938	1152	1643
VIT_14s0128g00730	131	132	332	415	236	224	341	221	175	116	166	235	174	148	202	170	186	182
VIT_14s0128g00740	183	163	397	332	440	511	394	460	417	228	292	312	276	279	321	272	330	276
VIT_14s0128g00750	513	429	907	496	1107	1053	1050	1084	997	501	698	584	673	666	620	664	716	776
VIT_14s0128g00760	943	954	1834	1375	1755	2045	1821	1800	1683	1078	1333	1092	1164	1296	876	1099	1132	1282
VIT_14s0128g00770	413	419	682	633	537	588	721	571	469	416	450	285	343	425	243	400	394	492
VIT_14s0128g00780	277	200	668	231	482	252	411	442	572	230	252	195	144	177	115	455	378	390
VIT_14s0128g00790	24	27	47	8	56	12	25	35	25	26	30	22	14	14	9	35	27	23
VIT_14s0128g00800	13	7	17	14	25	25	33	14	26	12	11	12	20	6	10	29	8	18
VIT_14s0128g00810	311	169	384	214	484	475	391	639	507	249	328	97	208	410	149	363	361	471
VIT_14s0128g00820	31	20	46	19	62	54	58	80	70	21	19	21	18	50	33	32	31	66
VIT_14s0128g00840	202	165	495	300	537	452	554	569	415	263	275	203	236	367	220	275	298	371
VIT_14s0128g00850	707	426	1181	758	1270	1109	1170	1198	1174	736	902	531	536	770	482	810	825	959
VIT_14s0128g00860	20	8	45	24	49	36	45	51	47	26	24	21	25	13	19	57	29	45
VIT_14s0128g00880	54	54	109	103	74	106	130	82	105	50	73	58	62	50	52	80	70	78
VIT_14s0128g00890	4279	3069	7670	5453	6216	8272	7431	7952	7215	4346	4817	3342	4074	4507	3506	4489	4652	5899
VIT_14s0128g00900	744	419	1141	594	1226	1311	996	1343	1376	660	682	451	627	690	622	856	881	1142
VIT_14s0128g00910	13	3	12	0	35	38	19	20	41	2	15	7	19	16	6	18	13	26
VIT_14s0030g00010	205	154	365	257	327	418	338	483	422	220	213	172	200	199	145	240	269	348
VIT_14s0030g00020	53	38	80	93	86	85	127	74	95	46	51	39	34	47	26	52	33	43
VIT_14s0030g00030	409	309	669	465	643	657	711	732	603	378	461	455	429	385	453	425	455	491
VIT_14s0030g00140	5	7	4	1	41	12	24	7	5	11	8	0	9	7	11	10	13	9
VIT_14s0030g00160	152	132	245	182	266	202	332	289	202	128	140	143	144	102	157	152	170	132
VIT_14s0030g00180	55	21	75	67	56	95	109	125	137	47	56	25	64	36	49	54	82	79
VIT_14s0030g00190	574	522	534	795	1344	836	900	707	499	790	593	870	1008	357	750	489	577	457
VIT_14s0030g00320	24	71	67	92	59	92	56	38	33	44	42	50	63	31	48	34	33	23
VIT_14s0030g00330	4	15	22	24	1	35	11	14	15	6	13	20	18	10	18	15	10	7
VIT_14s0030g00340	119	61	224	183	147	271	161	215	205	102	96	99	103	66	103	121	98	155
VIT_14s0030g00400	4672	3022	7516	5037	6922	7567	7199	8369	7336	4202	4766	5215	4461	4100	4258	4785	4837	6234
VIT_14s0030g00410	18	32	47	81	68	67	84	46	60	29	29	44	32	34	32	21	35	37
VIT_14s0030g00440	2612	2938	5422	6545	3742	5017	4896	4661	4169	3072	3019	3255	2976	2725	2184	2491	2371	2874
VIT_14s0030g00450	443	439	838	804	465	603	746	623	585	414	435	487	331	502	393	408	408	431
VIT_14s0030g00460	16	27	35	24	46	18	36	26	20	18	21	32	10	17	16	16	16	20
VIT_14s0030g00470	23	7	18	15	16	20	41	15	21	12	7	14	13	9	24	7	11	13
VIT_14s0030g00480	1378	1076	2182	1663	1989	2245	2154	2377	2088	1409	1438	1286	1227	1367	1154	1353	1379	1680
VIT_14s0030g00490	124	146	248	247	244	249	212	230	212	135	182	182	153	135	159	154	147	131
VIT_14s0030g00500	268	260	421	367	503	428	498	400	341	216	268	456	450	223	416	224	325	324
VIT_14s0030g00520	14	4	21	15	13	3	10	17	8	9	14	4	5	11	5	12	22	6
VIT_14s0030g00620	1599	1284	3052	1991	2615	2978	2188	2892	2700	1440	1792	1556	1534	1798	1371	1701	1826	2133
VIT_14s0030g00630	297	343	511	532	413	533	546	525	462	284	339	296	324	357	265	323	328	324
VIT_14s0030g00640	60	20	86	72	142	84	109	99	90	43	78	49	52	52	38	64	58	48
VIT_14s0030g00650	424	307	821	461	622	491	663	638	640	316	472	480	438	319	514	421	577	573
VIT_14s0030g00670	207	189	356	231	383	301	236	374	358	215	212	285	203	133	234	227	240	324
VIT_14s0030g00680	21	5	12	14	1	19	12	9	19	7	9	12	16	12	6	6	22	9
VIT_14s0030g00690	204	170	529	425	385	452	317	541	411	174	330	197	172	317	205	254	309	293
VIT_14s0030g00700	779	788	1198	1343	1050	1107	1374	1056	837	711	871	785	806	784	583	664	633	654
VIT_14s0030g00710	2069	1189	3956	2550	3923	5126	3378	4689	4427	2112	2297	2251	2322	1923	2509	2443	2824	3753
VIT_14s0030g00720	162	106	251	147	187	166	161	203	184	127	147	74	150	147	93	168	165	177
VIT_14s0030g00730	208	138	327	294	371	414	412	310	339	196	202	229	261	188	247	193	238	257
VIT_14s0030g00740	1911	2237	2897	3700	2655	2722	3254	2814	2316	1647	1900	2276	1778	2067	1351	1700	1577	1705
VIT_14s0030g00750	3142	2847	5558	5577	4410	5862	5417	5308	4888	2868	3365	3412	3268	2892	3064	2899	3153	3828
VIT_14s0030g00830	1216	1859	2198	2977	2210	2254	3093	1712	1682	1495	1635	2257	1848	1632	1717	1158	1336	1211
VIT_14s0030g00840	35	43	54	37	125	80	108	71	60	49	66	66	87	47	52	71	44	65
VIT_14s0030g00870	20	14	40	17	95	47	42	32	32	11	33	5	29	35	17	43	22	43
VIT_14s0030g00920	27	13	58	57	44	50	75	44	32	17	27	33	31	19	39	23	23	23
VIT_14s0030g00930	32	20	45	38	53	47	42	63	55	16	15	42	41	33	28	21	43	46
VIT_14s0030g00950	600	950	1098	1682	1256	1297	1891	880	839	843	888	1320	1031	962	922	648	648	583
VIT_14s0030g00960	123	128	288	186	267	306	272	232	269	167	203	115	144	181	140	201	166	189
VIT_14s0030g00980	15	19	22	20	13	11	30	24	19	8	6	14	12	14	4	9	20	9
VIT_14s0030g00990	26	30	78	44	88	78	97	66	49	25	48	35	56	37	40	56	49	32
VIT_14s0030g01000	28	15	42	21	69	66	36	65	36	26	32	20	29	21	38	43	53	45
VIT_14s0030g01030	7	6	23	22	22	17	24	26	9	10	11	21	16	15	13	12	18	14
VIT_14s0030g01040	4	5	7	13	24	20	25	21	17	9	13	6	14	13	14	19	25	16
VIT_14s0030g01050	41	24	56	29	107	72	59	89	73	29	53	25	38	43	53	55	52	52
VIT_14s0030g01100	8	10	16	20	19	16	36	23	13	14	22	19	19	15	8	14	10	21
VIT_14s0030g01150	4	12	18	24	16	21	20	12	15	8	16	21	8	8	18	6	7	8
VIT_14s0030g01160	62	55	136	111	179	222	181	139	108	108	119	94	128	97	114	138	121	112
VIT_14s0030g01170	15	12	14	12	40	29	29	26	31	12	12	6	23	14	24	20	19	22
VIT_14s0030g01220	1607	2741	3025	4251	2032	2506	3061	1904	1895	1434	1344	4872	2498	1391	2711	1215	1403	1328
VIT_14s0030g01230	2996	4684	5943	5394	3697	3831	6310	3730	3894	2753	2446	5667	3577	2045	3293	2335	2572	2424
VIT_14s0030g01240	2798	1855	4666	3521	3419	4116	4363	4117	3995	2178	2481	2655	2230	1931	2250	2153	2534	3714
VIT_14s0030g01250	1241	752	1880	1329	2190	2424	1943	2442	2434	1211	1425	983	1372	1315	1135	1470	1478	1877
VIT_14s0030g01260	1598	1495	3068	2280	2832	3099	2955	2809	2933	1794	2066	1769	1881	1738	1606	1713	1938	2091
VIT_14s0030g01270	2985	2367	4955	3673	4369	4814	5536	4444	4056	2998	3363	2279	2705	3657	2327	3095	3071	3582
VIT_14s0030g01280	506	463	1025	816	1056	1082	932	1083	879	532	725	523	554	667	467	610	547	619
VIT_14s0030g01300	13	17	23	55	32	51	51	35	19	10	26	8	37	30	25	14	13	9
VIT_14s0030g01340	97	54	156	82	211	214	158	205	185	87	161	142	139	120	139	113	163	175
VIT_14s0030g01350	2178	1484	3815	1949	3860	4412	3442	4034	4240	2086	2391	2059	2573	2110	2144	2404	2592	3094
VIT_14s0030g01360	13	15	35	35	20	42	33	33	22	23	20	16	17	19	14	19	21	19
VIT_14s0030g01370	139	134	208	183	219	243	294	207	182	138	147	104	137	153	97	115	120	149
VIT_14s0030g01400	23	25	59	59	43	56	49	39	44	25	45	28	24	35	26	33	32	32
VIT_14s0030g01430	36	15	62	44	55	26	59	45	45	16	37	14	15	44	17	37	26	40
VIT_14s0030g01440	3582	2316	6523	4258	5869	7054	5923	8124	7272	3621	3965	3271	3325	4362	2974	4364	4076	5865
VIT_14s0030g01470	0	1	23	11	0	0	0	0	4	0	0	1	51	11	20	0	0	0
VIT_14s0030g01480	396	382	741	628	623	728	851	751	726	462	495	433	409	430	343	452	466	581
VIT_14s0030g01490	51	30	92	36	55	74	50	64	88	36	39	26	22	32	31	43	63	73
VIT_14s0030g01500	24	20	56	64	31	45	58	36	34	22	28	45	30	21	23	12	29	22
VIT_14s0030g01520	53	34	112	58	89	47	95	72	56	30	52	32	20	44	42	43	44	55
VIT_14s0030g01530	955	511	1501	1086	1704	2087	1374	1902	1967	902	1080	975	1097	986	1163	1159	1328	1712
VIT_14s0030g01540	249	265	473	498	397	468	556	428	371	301	344	200	282	294	198	336	272	334
VIT_14s0030g01560	3707	3734	6390	5692	5058	5736	7002	5629	5221	3825	3378	4026	3373	3401	3358	3669	3380	3865
VIT_14s0030g01570	72	60	123	62	123	121	96	89	112	50	82	60	91	74	76	54	77	62
VIT_14s0030g01580	1294	867	2322	1741	2296	2865	1848	2816	2557	1267	1508	1493	1445	1493	1529	1559	1713	1989
VIT_14s0030g01590	109	148	244	230	199	220	197	150	132	120	120	344	210	77	257	72	109	102
VIT_14s0030g01600	6297	6240	14367	12093	9119	10516	12465	11574	10412	6437	6681	7453	6090	6395	5715	6551	6586	9108
VIT_14s0030g01610	1567	1220	2731	2913	2454	2365	3321	2808	2282	1473	1802	1853	1342	1575	1337	1632	1419	1867
VIT_14s0030g01620	1943	2160	3296	3102	2663	2704	3217	2831	2335	1838	2118	2146	2094	1930	1722	1908	1840	1846
VIT_14s0030g01650	858	597	1321	947	1113	1192	1044	1025	941	610	846	665	663	678	576	676	769	870
VIT_14s0030g01660	3554	3081	6005	6551	5019	7040	6733	5286	5185	3399	3826	4990	4406	3224	3822	3285	3671	4434
VIT_14s0030g01670	2525	2609	5038	4992	3763	5146	4878	4779	3874	2761	3064	3743	3136	3126	2852	2630	2685	3028
VIT_14s0030g01680	3573	3636	5977	5777	5642	6699	7605	5934	5643	3431	3873	4526	4159	3369	3918	3363	4064	4307
VIT_14s0030g01700	13	17	24	25	40	38	17	28	16	16	21	33	35	18	28	15	18	16
VIT_14s0030g01710	102	94	226	204	227	286	200	187	187	141	135	168	177	76	202	108	152	134
VIT_14s0030g01720	1480	1321	2418	2065	1891	2398	2386	2277	2044	1602	1716	1328	1545	1372	1063	1395	1323	1505
VIT_14s0030g01730	227	263	600	670	405	519	597	415	421	244	323	319	275	285	265	224	262	287
VIT_14s0030g01740	961	1117	2086	1718	1644	2431	1598	1718	2021	952	1090	1362	1343	1105	1234	1019	1238	1297
VIT_14s0030g01760	41	56	64	75	71	93	90	73	65	44	36	27	39	58	34	41	24	43
VIT_14s0030g01800	430	313	787	704	692	892	774	712	819	471	542	525	478	432	463	525	538	707
VIT_14s0030g01810	6038	6795	9839	10589	7773	8764	10757	8432	7268	6198	6116	6347	5763	6319	4582	5529	5639	6498
VIT_14s0030g01820	2123	1981	3661	3357	3004	3371	3068	3461	3488	1878	2215	2122	2035	2279	1928	2230	2354	2808
VIT_14s0030g01830	1188	1158	1864	1790	1748	1872	2121	1795	1597	1160	1383	1267	1248	1208	1010	1048	1157	1308
VIT_14s0030g01840	52	21	100	30	82	89	69	107	106	59	60	35	35	62	56	74	56	63
VIT_14s0030g01850	161	134	272	257	249	332	293	345	324	192	215	163	176	189	151	216	206	214
VIT_14s0030g01860	2272	2811	4050	3330	5161	4723	3555	4039	3478	2499	3392	2825	3559	2861	2476	2437	2631	2505
VIT_14s0030g01880	20	36	33	17	26	41	34	31	21	18	42	25	33	28	23	11	16	13
VIT_14s0030g01890	43	80	63	23	51	15	25	17	30	34	12	6	9	13	9	21	45	23
VIT_14s0030g01900	310	347	655	511	607	543	634	544	506	362	402	458	513	352	393	355	362	349
VIT_14s0030g01910	690	651	1125	1545	1017	1150	1429	983	934	628	782	806	677	655	626	608	618	741
VIT_14s0030g01930	528	676	1065	862	1052	1457	1241	1091	1082	657	688	869	984	553	819	643	825	706
VIT_14s0030g01950	123	139	192	233	690	215	319	246	152	184	201	451	266	147	294	130	176	110
VIT_14s0030g01960	220	215	315	330	266	292	380	293	273	206	217	170	161	230	169	192	173	176
VIT_14s0030g01970	15	7	18	18	26	16	29	26	32	21	9	13	14	10	13	22	10	9
VIT_14s0030g01980	846	911	1327	1013	1441	1034	1591	1157	1081	832	823	807	620	803	700	1028	961	832
VIT_14s0030g02020	255	257	505	493	548	358	664	616	451	404	390	223	225	348	251	346	330	392
VIT_14s0030g02090	69	30	108	98	98	132	101	117	105	76	94	47	45	69	46	92	55	112
VIT_14s0030g02110	14	30	41	15	17	43	40	42	31	24	19	8	34	16	11	22	14	20
VIT_14s0030g02170	1861	1593	2674	2355	2389	2466	2927	2531	2250	1543	1672	1452	1464	1617	1228	1627	1552	1957
VIT_14s0030g02180	835	1171	1214	1301	1512	1115	1516	1173	1000	820	877	1262	1128	810	1004	775	915	672
VIT_14s0030g02190	415	259	622	449	745	778	916	821	727	385	507	331	418	418	366	517	491	615
VIT_14s0030g02200	3986	1828	6271	5828	4955	6953	5177	7259	5105	3621	3644	5304	3320	2798	4714	2755	3260	5588
VIT_14s0030g02210	53	27	62	74	71	80	66	77	58	59	33	65	36	28	36	34	19	53
VIT_14s0030g02220	816	628	1272	1177	891	1273	928	1128	1097	626	651	792	799	547	601	587	699	837
VIT_14s0030g02230	2270	2078	4144	3224	3294	3814	3518	4177	3527	2148	2486	1864	2049	2518	1663	2480	2150	2870
VIT_14s0030g02240	132	145	253	244	240	280	294	256	243	137	183	130	165	116	105	182	180	191
VIT_14s0030g02260	45	28	73	42	67	69	59	67	70	36	46	39	57	54	33	44	55	54
VIT_14s0030g02280	32	38	82	42	56	76	67	57	55	38	46	28	53	46	18	47	47	52
VIT_14s0030g02290	43	22	40	43	36	36	39	54	32	19	28	31	29	22	9	19	31	30
VIT_14s0030g02300	2100	1289	3542	1977	3620	3859	3565	4395	3821	2263	2494	1807	2066	2339	1708	2545	2592	3147
VIT_14s0030g02310	98	73	62	99	167	98	255	79	101	57	126	114	113	125	64	73	75	49
VIT_14s0081g00010	293	556	442	846	1057	765	1266	539	463	535	621	625	887	489	448	432	353	271
VIT_14s0081g00020	47	219	91	57	95	47	112	69	58	34	50	152	101	60	124	56	55	28
VIT_14s0081g00030	1099	4808	2546	2594	3484	1861	3807	2256	1857	1137	1485	5087	3456	1928	3778	1383	1583	821
VIT_14s0081g00060	19	22	22	24	15	29	23	26	31	10	14	20	30	5	27	7	7	16
VIT_14s0081g00070	299	240	400	361	604	415	472	414	350	289	330	353	351	275	301	295	314	259
VIT_14s0081g00080	492	571	961	875	814	821	1124	744	730	598	624	568	554	534	488	617	606	573
VIT_14s0081g00090	443	407	961	786	668	774	819	788	733	472	516	436	380	454	332	467	432	573
VIT_14s0081g00110	24	15	21	22	21	28	29	32	29	12	17	20	14	18	16	14	20	19
VIT_14s0081g00120	15	21	34	33	35	39	36	36	43	16	17	23	23	14	8	12	13	33
VIT_14s0081g00140	26	18	45	18	31	30	44	38	39	18	26	13	22	20	12	18	33	20
VIT_14s0081g00150	699	493	1118	823	917	1130	1215	1056	1055	624	670	407	593	585	423	676	555	724
VIT_14s0081g00160	77	42	94	70	110	102	108	135	109	64	54	61	74	62	70	64	80	82
VIT_14s0081g00200	51	67	96	101	135	88	158	132	73	84	72	93	84	57	51	63	75	66
VIT_14s0081g00240	572	458	1006	597	896	962	944	942	868	540	564	578	615	697	541	548	612	666
VIT_14s0081g00270	20	13	38	29	43	22	33	35	34	27	24	16	21	16	12	8	20	30
VIT_14s0081g00280	23	8	53	22	40	41	47	41	58	42	26	14	18	28	15	32	33	45
VIT_14s0081g00320	1602	1005	2732	2175	2383	3082	3300	3046	3245	1667	1663	1642	1591	1328	1471	1581	1704	2086
VIT_14s0081g00330	106	100	169	150	266	212	241	179	214	110	144	155	191	124	123	130	139	137
VIT_14s0081g00440	5705	5414	10151	8712	9611	9961	10228	9855	8743	5639	6864	6839	6032	5834	5227	5791	6435	6763
VIT_14s0081g00460	2183	1362	3471	2233	3776	4346	3360	4633	4215	2127	2278	2016	2264	2249	2135	2577	2745	3639
VIT_14s0081g00480	1336	1219	2051	2253	2108	2180	2235	1877	1866	1403	1388	1513	1536	1024	1094	1426	1242	1423
VIT_14s0081g00490	240	220	472	428	542	572	553	551	502	251	344	353	307	304	279	262	344	325
VIT_14s0081g00500	2930	4039	5798	6278	5020	5946	7437	4560	4786	3769	4168	3555	3841	3706	3138	3315	3968	3547
VIT_14s0081g00540	46	38	65	57	37	59	52	54	35	30	43	38	23	50	15	34	30	46
VIT_14s0081g00560	97	122	211	250	179	210	230	168	189	127	111	108	111	100	138	111	126	103
VIT_14s0081g00580	161	129	301	265	193	265	268	247	258	160	147	117	157	168	121	187	191	214
VIT_14s0081g00600	124	124	199	176	156	187	187	168	161	96	115	122	120	135	118	114	117	101
VIT_14s0081g00620	327	424	717	597	772	909	780	699	739	447	493	652	523	510	528	446	593	600
VIT_14s0081g00630	1949	1956	3380	3229	3705	4115	3868	3500	3384	2265	2484	2404	2428	2336	2230	2179	2464	2596
VIT_14s0081g00650	51	35	66	48	82	74	65	79	94	40	44	33	39	55	41	52	53	60
VIT_14s0081g00660	125	90	217	207	154	216	265	180	177	110	130	112	90	151	90	104	101	141
VIT_14s0081g00670	16	12	44	22	27	28	38	33	32	10	17	21	18	22	22	14	17	13
VIT_14s0081g00680	306	317	535	452	462	537	595	480	518	297	357	248	314	277	232	328	344	414
VIT_14s0081g00690	29	38	49	98	50	79	77	64	71	28	38	57	43	44	36	37	46	38
VIT_14s0081g00700	592	465	917	807	641	722	976	815	702	535	597	281	337	619	280	527	450	594
VIT_14s0081g00710	281	306	603	388	818	586	583	585	556	346	336	584	617	311	579	279	513	290
VIT_14s0081g00720	6	18	8	29	25	21	22	16	11	13	15	53	24	6	27	9	6	5
VIT_14s0081g00730	8	9	21	9	31	15	43	27	31	11	20	13	16	13	4	19	34	13
VIT_14s0081g00760	215	160	335	308	313	404	367	274	281	190	239	213	207	154	186	210	214	268
VIT_14s0036g00050	506	754	1086	974	922	832	1112	741	674	560	626	588	615	527	512	535	477	497
VIT_14s0036g00070	11	12	41	18	11	22	10	37	7	5	13	8	8	7	7	20	11	20
VIT_14s0036g00110	11	18	30	51	23	24	53	24	13	20	23	33	22	23	23	12	18	13
VIT_14s0036g00240	20	11	25	13	35	48	25	35	29	25	23	10	11	27	19	31	23	37
VIT_14s0036g00330	45	30	93	22	99	92	75	121	104	49	45	23	39	67	37	95	50	102
VIT_14s0036g00340	24	42	64	111	50	57	94	52	49	28	22	46	29	22	27	43	35	28
VIT_14s0036g00370	590	655	1113	1004	1183	1185	1283	1107	953	598	769	760	811	594	673	738	668	809
VIT_14s0036g00420	383	505	356	479	399	299	368	416	196	382	342	293	316	312	175	279	239	270
VIT_14s0036g00430	1506	1103	3139	2343	2513	3219	2407	2998	2919	1576	1861	1413	1626	1682	1559	1753	1872	2289
VIT_14s0036g00470	126	109	151	207	134	186	153	151	163	113	127	82	103	90	84	101	118	95
VIT_14s0036g00480	66	48	122	91	122	147	128	109	128	51	93	87	72	66	60	74	66	71
VIT_14s0036g00500	112	69	99	25	191	181	101	244	199	85	101	53	121	94	93	141	140	179
VIT_14s0036g00510	1746	1131	2841	1797	2906	3409	2997	3389	3012	1917	2084	1524	1806	1890	1477	2150	2079	2700
VIT_14s0036g00520	2832	1533	4488	3673	3714	3790	5309	4038	3473	2436	3044	2652	2431	1991	2339	2569	2424	3879
VIT_14s0036g00540	3	10	14	22	23	24	19	11	16	9	9	22	18	3	15	17	16	8
VIT_14s0036g00570	3348	1580	5200	2529	5449	6098	5073	5849	5873	2813	3143	2750	3558	2503	3196	3377	3602	4546
VIT_14s0036g00630	450	445	809	828	832	768	1106	830	756	466	537	456	556	468	356	488	493	536
VIT_14s0036g00660	607	369	861	706	981	977	1115	1116	1156	535	702	482	550	791	431	750	714	923
VIT_14s0036g00680	128	125	286	206	255	258	246	231	192	167	172	137	172	146	152	161	201	228
VIT_14s0036g00690	182	160	315	237	270	286	298	275	276	151	175	176	182	158	195	183	193	235
VIT_14s0036g00700	553	387	803	447	619	679	648	781	700	391	463	257	293	443	271	435	455	707
VIT_14s0036g00730	490	246	795	361	650	964	736	927	905	437	512	383	485	546	401	481	534	636
VIT_14s0036g00750	1671	1294	3502	2911	2411	3318	3453	3219	2991	1865	1954	1791	1769	1827	1577	1751	1809	2414
VIT_14s0036g00810	132	90	248	155	245	288	249	242	183	136	179	161	191	171	133	152	167	208
VIT_14s0036g00840	54	38	61	34	89	83	52	89	77	49	38	46	57	44	47	50	44	68
VIT_14s0036g00850	218	254	372	308	334	376	407	385	334	194	235	253	271	237	222	213	268	256
VIT_14s0036g00920	1122	754	2133	1893	1756	2318	1518	2357	1926	1032	1166	1436	1223	1051	1202	1014	1407	1833
VIT_14s0036g00930	20023	17074	35235	38054	34506	35567	40778	36441	31599	23106	25358	27755	22229	20126	19194	21678	20140	26280
VIT_14s0036g00940	735	671	1270	1121	1158	1183	1244	1289	1109	693	814	579	644	798	578	739	735	1018
VIT_14s0036g00970	237	279	487	476	384	433	617	435	457	242	342	230	253	372	204	265	291	369
VIT_14s0036g00980	376	414	674	714	568	688	647	583	584	442	453	417	379	469	342	373	395	466
VIT_14s0036g01020	15264	14386	27000	29546	26046	23885	33915	27307	23545	17367	20002	18756	15213	16835	12212	16201	15073	19465
VIT_14s0036g01030	2561	2437	5171	4132	5352	5955	5213	5489	5192	3236	3411	3598	3399	3104	3268	3303	3454	3975
VIT_14s0036g01060	18	26	25	44	50	47	56	42	34	20	26	32	52	23	55	44	40	8
VIT_14s0036g01130	562	578	1014	983	1011	1341	1157	1125	1161	608	704	741	869	622	709	601	710	747
VIT_14s0036g01170	86	68	187	136	164	181	185	187	156	82	120	63	88	128	95	91	112	99
VIT_14s0036g01380	461	324	915	836	627	1074	709	871	916	506	492	615	518	375	606	433	531	634
VIT_14s0036g01400	22	14	37	26	56	40	34	34	32	25	14	37	18	7	23	18	23	20
VIT_14s0036g01450	696	673	1480	1392	1313	2035	1329	1396	1389	788	882	1510	1254	717	1506	731	1047	1001
VIT_14s0036g01460	1674	1049	3100	1814	3193	3864	3002	3787	3591	1730	1995	1892	1973	1952	2112	2264	2581	2882
VIT_14s0036g01520	253	183	377	399	295	347	357	379	358	242	265	188	221	202	181	257	232	291
VIT_14s0006g00060	42	38	88	65	57	79	92	64	80	45	44	54	39	44	43	44	38	81
VIT_14s0006g00070	149	176	303	236	245	282	267	260	254	123	180	222	156	179	153	176	161	221
VIT_14s0006g00100	2874	1447	4559	2849	3330	5103	3564	3949	3319	2298	2932	2387	2932	1786	2294	2046	3012	3497
VIT_14s0006g00140	49	50	140	124	145	109	157	102	132	56	82	67	78	79	93	58	78	68
VIT_14s0006g00170	146	164	171	79	198	271	171	229	280	110	191	125	153	128	114	139	154	145
VIT_14s0006g00180	6652	3791	11977	9808	7791	9913	10682	13952	11796	7701	7104	3023	3394	6628	1997	8177	4709	8849
VIT_14s0006g00250	259	221	508	623	429	590	532	592	502	206	312	186	229	753	228	405	332	315
VIT_14s0006g00300	9	14	34	21	55	9	31	24	34	11	20	6	9	7	7	35	11	10
VIT_14s0006g00350	7311	5984	14712	7980	9265	9774	8489	10421	10188	5727	6860	4358	4914	7835	4009	8636	6899	8027
VIT_14s0006g00380	683	462	1076	823	1112	1446	1094	1293	1215	653	711	743	806	633	745	788	871	898
VIT_14s0006g00410	212	195	382	323	477	480	441	459	405	229	291	314	335	255	283	294	339	348
VIT_14s0006g00420	168	214	321	269	409	358	425	331	299	222	236	339	320	204	256	192	287	244
VIT_14s0006g00430	4664	2635	7518	5428	6799	7892	5861	9975	8755	4509	4570	3770	3724	3863	3548	4925	5103	6803
VIT_14s0006g00520	20	11	27	28	27	36	14	15	28	14	13	28	31	16	22	17	15	7
VIT_14s0006g00630	281	254	387	446	376	490	477	428	350	263	238	318	328	182	284	228	327	291
VIT_14s0006g00640	3299	3241	6123	4366	5473	6047	5377	5190	5193	3541	3755	3691	4139	3224	2712	3173	4367	3987
VIT_14s0006g00650	215	187	479	480	408	462	592	588	490	251	344	220	247	324	178	315	282	407
VIT_14s0006g00660	497	313	781	617	737	838	939	924	824	477	569	402	441	428	396	434	500	663
VIT_14s0006g00780	83	55	97	71	164	161	138	142	135	90	95	67	89	68	56	97	120	89
VIT_14s0006g00820	1330	1454	2036	2002	1760	1759	2091	1878	1565	1222	1246	1066	1044	1230	799	1161	1062	1279
VIT_14s0006g00830	668	602	1211	912	1180	1153	1350	1161	1083	723	797	717	559	855	518	750	704	786
VIT_14s0006g00850	125	108	237	182	238	261	223	228	228	133	155	179	152	154	167	160	171	166
VIT_14s0006g00860	47	30	67	45	122	154	67	150	135	64	58	54	86	77	73	85	124	104
VIT_14s0006g00910	551	403	800	770	888	1029	862	916	829	547	586	544	651	524	636	503	653	618
VIT_14s0006g00920	10	14	40	15	55	42	30	58	45	17	28	16	19	29	28	18	21	18
VIT_14s0006g00960	362	320	815	626	759	862	950	977	823	480	481	546	500	484	463	497	527	608
VIT_14s0006g00990	136	89	196	79	236	274	240	296	253	127	147	85	125	148	156	148	164	173
VIT_14s0006g01000	144	113	255	101	326	442	239	331	367	178	208	159	245	188	202	192	248	266
VIT_14s0006g01020	1597	1297	2659	2123	2211	2632	2925	2496	2261	1575	1735	1372	1506	1663	1307	1560	1693	1820
VIT_14s0006g01030	1863	1373	3470	3092	2728	3252	3201	3243	2962	1763	1956	1941	1893	1610	1584	1768	1580	2146
VIT_14s0006g01040	61	45	124	69	104	90	77	115	64	54	89	62	99	70	35	67	77	60
VIT_14s0006g01080	2479	1745	4437	3667	3101	5128	3693	4401	3907	2542	2516	2576	2523	2382	2242	2210	2293	3093
VIT_14s0006g01090	183	184	351	357	238	268	390	245	260	165	184	184	170	169	139	163	175	221
VIT_14s0006g01100	25	18	32	26	69	52	52	63	76	24	35	16	22	18	30	36	26	44
VIT_14s0006g01240	202	142	291	254	356	370	381	379	338	217	165	207	230	213	223	209	225	228
VIT_14s0006g01250	149	178	226	324	224	155	463	263	240	154	266	107	158	136	122	178	197	163
VIT_14s0006g01370	51	36	126	75	118	113	120	124	93	74	58	62	54	93	52	69	57	103
VIT_14s0006g01380	47	30	55	45	76	59	94	74	43	24	43	24	31	33	28	32	41	26
VIT_14s0006g01390	62	38	77	51	61	87	92	79	93	48	71	64	51	65	35	40	54	49
VIT_14s0006g01400	521	449	764	1036	726	716	1107	932	882	675	504	400	334	493	328	578	442	669
VIT_14s0006g01410	259	199	376	411	394	420	420	402	316	255	285	251	297	238	229	247	227	250
VIT_14s0006g01420	75	172	142	172	182	192	165	147	154	121	105	102	159	118	119	76	84	94
VIT_14s0006g01430	311	198	395	304	407	398	424	439	418	256	302	209	191	271	146	220	275	295
VIT_14s0006g01440	604	464	974	937	905	1022	1062	1002	855	578	624	516	584	594	484	622	711	740
VIT_14s0006g01530	1925	1733	3339	3368	3889	3614	3942	3668	2783	1937	2286	3283	2531	2134	2489	1873	2204	2419
VIT_14s0006g01570	1195	1029	2178	1657	2175	2805	2235	2430	2427	1361	1533	1512	1552	1387	1373	1472	1674	1698
VIT_14s0006g01580	368	669	740	690	531	648	845	589	473	356	319	627	500	261	370	437	335	292
VIT_14s0006g01600	55	71	52	66	52	42	101	86	68	103	51	49	46	30	36	55	17	36
VIT_14s0006g01610	78	121	116	121	259	118	202	95	111	92	90	192	164	75	133	90	89	47
VIT_14s0006g01650	1204	1041	1929	1124	1630	1685	1818	1893	1968	1188	1201	797	883	1002	690	1167	1224	1298
VIT_14s0006g01660	759	623	1253	1315	1198	1298	1407	1295	1123	762	858	886	768	759	735	724	755	956
VIT_14s0006g01740	149	88	157	152	189	187	278	198	177	140	123	97	131	110	124	135	115	144
VIT_14s0006g01750	27	12	42	37	34	48	40	40	34	20	18	20	27	13	12	20	20	20
VIT_14s0006g01790	279	247	488	404	555	460	523	453	409	259	269	324	389	251	372	301	311	249
VIT_14s0006g01820	1939	1443	3361	2545	2880	3643	3448	3466	2916	1893	2111	1889	1819	2338	1732	2020	1971	2428
VIT_14s0006g01830	38	27	97	73	105	107	73	80	101	31	52	53	74	57	52	56	47	55
VIT_14s0006g01840	121	92	256	187	220	247	231	178	238	138	143	117	127	164	92	152	176	176
VIT_14s0006g01850	55	18	55	23	90	132	36	168	121	38	46	24	39	60	51	89	71	127
VIT_14s0006g01860	10	1	6	3	33	12	3	24	20	9	10	1	2	4	2	16	15	14
VIT_14s0006g01870	479	450	837	682	747	798	784	850	805	509	566	398	443	495	398	532	532	609
VIT_14s0006g01880	1425	1424	2596	2173	2360	2602	2835	2415	2297	1415	1584	1788	1610	1509	1461	1402	1465	1470
VIT_14s0006g01890	520	377	854	646	708	768	856	882	811	426	544	407	415	467	391	526	501	638
VIT_14s0006g01900	47	59	111	108	85	66	66	80	71	36	55	64	56	56	47	53	47	60
VIT_14s0006g01930	524	449	555	923	661	520	852	687	476	602	437	532	329	283	276	520	267	429
VIT_14s0006g01950	130	76	166	96	151	236	150	199	186	79	91	79	84	66	86	95	107	176
VIT_14s0006g01970	187	122	335	245	325	331	269	317	327	170	192	145	180	179	171	184	200	238
VIT_14s0006g01980	620	547	1023	922	913	1072	1034	962	923	649	785	535	532	635	409	591	671	781
VIT_14s0006g01990	7739	6412	15218	9264	12671	14168	15900	14741	13421	8433	8691	7453	7414	8751	6415	8638	7649	10402
VIT_14s0006g02000	559	307	793	296	925	1054	598	987	1026	446	585	368	543	569	445	696	562	861
VIT_14s0006g02010	638	745	965	932	843	747	1095	810	681	533	577	571	501	604	526	613	545	594
VIT_14s0006g02020	8081	6413	14353	9234	12454	14522	12202	14612	12976	7427	8884	7251	7647	8590	6711	8260	8812	10361
VIT_14s0006g02080	1000	892	1643	1808	1313	1854	1655	1546	1465	1014	979	1258	1051	831	919	815	977	1023
VIT_14s0006g02090	31	19	36	29	23	57	43	36	47	32	18	20	25	17	19	22	33	35
VIT_14s0006g02100	7	16	8	17	17	14	18	23	18	10	19	10	15	21	8	18	13	15
VIT_14s0006g02140	77	31	138	107	86	88	61	114	127	74	57	75	58	52	49	54	88	62
VIT_14s0006g02170	47	62	92	80	77	85	81	62	53	47	53	58	56	50	52	51	61	49
VIT_14s0006g02190	91	67	127	71	175	168	132	184	154	59	85	66	118	116	94	100	133	150
VIT_14s0006g02210	169	122	315	260	365	475	267	462	432	198	207	278	261	204	315	187	329	315
VIT_14s0006g02220	126	125	205	149	170	168	212	151	134	142	138	148	123	81	97	81	74	96
VIT_14s0006g02230	90	114	205	177	154	198	228	154	191	129	96	111	89	149	81	111	106	123
VIT_14s0006g02240	21869	16029	41363	29051	29961	37964	37535	39848	34240	19703	21168	22451	20457	20433	17905	21736	21712	28519
VIT_14s0006g02280	944	785	1602	1341	1384	1576	1533	1716	1488	740	1037	648	791	963	642	971	952	1201
VIT_14s0006g02310	6937	10268	14814	14852	10879	9376	9732	13596	11099	5308	8019	9590	6533	7691	4741	6664	6165	6955
VIT_14s0006g02470	1178	1308	1916	2144	2058	1803	2294	1780	1469	1174	1356	1446	1454	1228	1165	1201	1038	1107
VIT_14s0006g02480	64	67	124	112	150	121	152	120	109	96	73	44	82	77	60	65	55	69
VIT_14s0006g02490	1149	670	1708	1724	1691	1824	1295	1920	1488	1013	1336	1227	1002	1202	774	1089	988	1197
VIT_14s0006g02510	496	614	742	884	1110	837	1384	949	756	641	494	647	852	415	478	668	520	529
VIT_14s0006g02520	1259	759	1860	1311	2123	2151	1981	2222	2057	1220	1283	1165	1418	1139	1215	1367	1448	1734
VIT_14s0006g02590	239	138	489	284	216	392	312	291	326	147	96	138	167	98	117	143	120	193
VIT_14s0006g02600	296	335	699	606	858	590	981	615	563	328	389	469	548	288	467	325	425	334
VIT_14s0006g02610	115	98	130	127	234	87	223	174	121	111	98	83	74	77	66	120	81	91
VIT_14s0006g02620	2464	2400	4023	3815	4307	4552	4593	4311	3805	2591	2456	2766	2686	2057	2519	2781	2782	3096
VIT_14s0006g02630	10	12	23	21	25	10	16	9	9	10	13	15	24	6	26	12	20	15
VIT_14s0006g02660	6	7	21	14	34	14	11	14	12	11	16	18	23	21	11	7	10	8
VIT_14s0006g02670	35	15	37	63	52	42	102	52	53	28	44	27	33	23	40	38	43	41
VIT_14s0006g02680	168	122	255	179	359	370	349	397	315	217	173	169	253	182	177	224	221	253
VIT_14s0006g02690	190	181	305	318	338	286	343	306	301	171	207	202	211	173	188	171	209	182
VIT_14s0006g02710	48	67	97	121	69	77	116	85	83	58	58	51	53	43	30	50	48	54
VIT_14s0006g02720	519	598	815	765	895	794	826	731	745	500	550	538	612	498	481	453	488	476
VIT_14s0006g02750	323	315	513	570	504	498	633	484	473	329	373	420	378	285	306	297	322	313
VIT_14s0006g02760	102	57	164	130	170	188	191	230	271	82	73	46	71	76	73	134	150	134
VIT_14s0006g02800	134	82	245	199	170	188	152	224	212	95	139	87	97	98	95	139	142	162
VIT_14s0006g02810	31	19	67	40	59	54	51	37	40	12	27	24	20	23	20	23	24	39
VIT_14s0006g02820	2367	2547	4143	3400	3837	3539	4763	3661	3284	2355	2633	2438	2500	2198	1841	2359	2025	2474
VIT_14s0006g02830	1149	1300	2061	2411	1873	1964	2121	1967	1516	1230	1340	1573	1287	1403	1027	1194	1122	1149
VIT_14s0006g02840	17	29	53	50	53	51	63	50	69	22	16	39	31	33	38	31	31	31
VIT_14s0006g02850	85	45	122	192	91	141	136	131	115	65	104	113	34	81	60	84	90	87
VIT_14s0006g02860	291	186	507	346	484	489	514	541	535	278	403	292	319	361	239	345	355	369
VIT_14s0006g02870	96	67	134	172	151	131	156	119	128	78	97	99	93	87	74	87	83	102
VIT_14s0006g02880	79	167	198	253	170	206	227	200	187	105	123	163	137	109	117	110	122	111
VIT_14s0006g02890	19	14	19	11	34	26	35	28	25	22	13	7	28	13	25	32	20	22
VIT_14s0006g02900	321	327	603	578	548	558	607	644	499	459	437	304	308	356	292	410	344	463
VIT_14s0006g02910	5427	4836	7111	9318	7595	6584	10935	7682	6363	5449	5735	6734	5341	4059	4296	4714	4405	5174
VIT_14s0006g02950	3018	1364	2658	2707	2225	2017	3846	3141	2112	2214	2303	1074	1370	1697	698	1933	1527	2418
VIT_14s0006g02960	1208	1066	2101	2014	1869	2210	2283	2174	2049	1244	1374	1212	1169	1347	1136	1310	1417	1631
VIT_14s0006g02970	24	9	25	18	39	9	25	28	13	20	23	36	11	3	7	20	19	13
VIT_14s0006g02990	252	157	424	573	1417	606	597	546	429	353	439	789	645	246	577	320	366	247
VIT_14s0006g03000	940	610	1759	1131	1309	1620	1553	1703	1695	837	1014	628	810	876	677	995	945	1349
VIT_14s0006g03040	2465	2076	4643	4496	3638	4228	4207	4555	4006	2624	2850	2985	2424	2310	2152	2467	2532	3222
VIT_14s0006g03050	41	45	129	49	80	112	66	104	121	45	35	25	58	44	39	57	81	98
VIT_14s0006g03060	161	178	211	229	235	254	291	195	168	150	159	183	147	135	130	122	135	108
VIT_14s0006g03070	569	497	1086	882	952	1192	991	1128	1062	587	733	679	667	690	619	638	748	849
VIT_14s0006g03120	346	326	702	603	630	769	861	693	669	380	430	489	430	445	430	425	397	433
VIT_14s0006g03130	123	89	210	83	320	335	217	352	310	143	172	108	156	177	178	212	226	233
VIT_14s0006g03140	30	16	36	26	80	73	39	70	67	31	44	32	50	31	55	29	52	51
VIT_14s0006g03150	56	18	80	14	146	164	70	154	115	38	72	41	106	95	81	83	85	90
VIT_14s0006g03160	11	4	6	7	22	19	10	22	20	7	16	9	12	11	9	19	12	25
VIT_14s0006g03170	82	28	79	26	150	183	81	193	169	53	80	52	92	88	92	135	138	145
VIT_14s0006g03200	2158	1935	4216	2921	3862	4082	4605	3998	3634	2119	2522	2188	2354	2797	2124	2579	2489	2808
VIT_14s0006g03220	41	45	67	73	52	58	98	57	45	46	46	31	44	51	34	36	35	36
VIT_14s0006g03230	6681	7885	11670	12951	10222	11050	14671	9829	9338	6978	6869	8085	7457	6870	6247	6483	6515	7279
VIT_14s0006g03240	947	1110	1525	1382	1639	1659	1761	1492	1409	928	1025	1066	1188	1092	1061	992	1117	949
VIT_14s0006g03250	18	16	45	73	45	42	37	31	39	18	27	36	39	28	32	23	20	31
VIT_14s0006g03260	31	16	33	37	64	29	47	47	53	35	31	40	41	17	31	19	28	31
VIT_14s0006g03280	4272	2576	7062	4332	6732	8122	7957	7955	7571	4345	4490	4091	4876	3476	3845	4664	5266	6270
VIT_14s0083g00070	506	502	887	694	832	820	824	786	713	495	567	564	532	463	561	503	526	492
VIT_14s0083g00080	4	13	10	14	13	12	11	17	7	7	6	23	14	10	7	13	3	5
VIT_14s0083g00100	328	254	572	425	545	593	494	592	539	318	392	399	339	419	307	375	391	539
VIT_14s0083g00110	121	85	208	319	324	192	243	276	250	154	111	335	128	107	156	151	115	135
VIT_14s0083g00120	127	126	279	234	328	277	310	250	221	150	190	170	213	219	123	145	128	132
VIT_14s0083g00160	2061	2377	3487	4307	2871	3440	3606	3156	2779	2105	2284	2203	1829	2469	1706	1999	1952	2193
VIT_14s0083g00170	1278	824	1924	1395	1662	2132	1855	2132	2033	1118	1155	1145	1092	1171	1074	1329	1435	1654
VIT_14s0083g00180	421	503	820	830	566	757	790	619	683	433	426	473	446	466	337	380	404	379
VIT_14s0083g00200	234	199	412	302	446	426	434	440	481	246	252	184	228	227	252	320	321	342
VIT_14s0083g00220	959	633	1627	1051	1490	1677	1473	1720	1646	950	969	809	936	782	914	949	1013	1272
VIT_14s0083g00230	30	47	59	85	105	61	89	52	69	44	52	72	66	52	43	41	58	61
VIT_14s0083g00300	4212	3588	7425	7284	6415	7351	6723	7377	6438	4081	4767	4663	4396	4264	3807	4221	4128	4980
VIT_14s0083g00320	364	696	757	931	906	827	905	830	751	566	819	606	518	961	517	495	509	515
VIT_14s0083g00330	400	277	712	662	720	800	699	746	765	479	494	356	457	530	317	445	506	573
VIT_14s0083g00340	587	630	1193	892	1099	1201	1078	1103	1079	761	788	684	738	681	606	712	704	705
VIT_14s0083g00360	345	447	641	653	721	574	934	627	564	372	504	367	428	430	311	420	419	439
VIT_14s0083g00370	32	15	46	74	59	46	20	31	34	28	40	22	6	86	11	21	31	40
VIT_14s0083g00390	17	17	36	38	22	55	22	37	40	29	36	34	17	20	19	13	33	42
VIT_14s0083g00400	252	327	760	980	745	797	736	707	486	367	537	455	391	845	396	467	403	462
VIT_14s0083g00410	14	36	46	58	48	39	50	29	27	10	19	35	33	39	42	25	28	19
VIT_14s0083g00420	52	46	104	99	109	99	102	111	74	40	77	72	69	82	62	57	65	75
VIT_14s0083g00440	142	110	221	169	195	245	242	257	238	120	168	133	103	150	111	168	167	184
VIT_14s0083g00450	3065	2590	5203	4026	4570	4865	4251	5023	4593	2903	3357	2854	2805	2768	2395	3005	3321	3951
VIT_14s0083g00460	12	23	31	7	28	5	22	10	20	15	11	8	13	12	11	10	21	14
VIT_14s0083g00520	2678	1663	4638	4611	4354	4884	4559	5301	4240	3228	3268	2915	2813	2396	2432	2925	2557	3937
VIT_14s0083g00530	816	789	1497	1498	1539	1747	1647	1520	1582	990	1052	1321	1100	1075	1186	947	1040	1060
VIT_14s0083g00540	924	854	1804	1550	1475	1843	1598	1826	1719	1013	1137	972	981	1178	968	1074	1033	1348
VIT_14s0083g00550	28	29	58	65	63	65	78	57	58	30	37	32	20	30	20	37	40	41
VIT_14s0083g00570	6	0	24	14	7	24	14	37	26	11	13	16	7	8	11	11	11	22
VIT_14s0083g00580	19581	17213	37675	32567	31683	37698	43357	38337	34456	20890	25309	23643	19608	21087	22413	24027	24253	29592
VIT_14s0083g00590	871	1090	1891	1832	1610	1878	2419	1755	1678	1096	1236	1026	1036	1081	889	1096	1213	1151
VIT_14s0083g00610	158	84	241	159	230	190	283	271	225	143	156	108	121	161	77	130	152	182
VIT_14s0083g00620	90	164	223	334	293	441	260	241	285	154	214	200	236	248	191	116	164	130
VIT_14s0083g00630	539	371	718	648	713	1006	788	892	776	418	504	444	580	463	442	470	417	609
VIT_14s0083g00640	167	181	249	350	426	373	320	291	285	204	236	285	326	216	219	204	242	147
VIT_14s0083g00670	1431	709	2499	2537	1232	1626	2238	1951	1502	1140	1196	1191	958	519	847	1171	709	1490
VIT_14s0083g00690	443	314	717	464	562	601	670	763	624	428	437	254	311	483	225	504	390	533
VIT_14s0083g00710	695	682	1499	1073	957	1349	1459	1488	1236	701	761	869	665	807	583	716	768	807
VIT_14s0083g00720	41	29	63	39	62	54	70	67	67	37	61	26	41	47	30	40	39	45
VIT_14s0083g00730	327	168	494	380	456	498	572	547	563	336	324	200	184	276	160	382	288	413
VIT_14s0083g00740	14889	13086	27622	25003	18514	28032	24464	22709	21922	13212	15847	18432	16335	13199	14399	12488	14372	17082
VIT_14s0083g00750	1750	973	2886	1731	3060	3643	2599	3822	3451	1680	2118	1716	1971	1900	1747	2315	2383	2910
VIT_14s0083g00760	9	4	6	9	27	13	8	20	31	6	6	5	10	12	7	22	13	25
VIT_14s0083g00770	60	78	110	132	98	127	151	95	124	71	76	85	62	65	71	66	78	77
VIT_14s0083g00780	881	626	1783	1181	1507	1684	1620	1729	1661	936	1036	856	793	1041	773	997	1071	1429
VIT_14s0083g00790	400	257	637	435	710	697	708	738	717	407	465	298	333	480	275	494	535	597
VIT_14s0083g00800	241	111	362	226	236	304	323	319	298	214	179	138	138	115	129	188	176	255
VIT_14s0083g00810	337	281	607	463	403	516	492	625	532	321	325	233	227	326	211	302	303	388
VIT_14s0083g00870	741	601	1350	1190	1080	1398	1183	1347	1179	722	761	733	778	715	659	682	767	948
VIT_14s0083g00880	4038	2875	6840	4570	6318	7422	7570	7964	6231	4342	4426	3086	3502	4224	3100	4673	3944	5897
VIT_14s0083g00910	85	60	145	147	184	160	143	182	147	139	130	82	121	97	86	123	82	135
VIT_14s0083g00920	47	67	87	164	104	69	155	65	92	51	55	127	48	39	39	81	56	36
VIT_14s0083g00930	1879	1649	3342	2710	2846	3565	2963	3178	3073	1780	1988	2259	2042	1782	2043	1762	1877	2310
VIT_14s0083g00940	3141	1953	3862	2115	2571	3864	3659	3506	3139	2102	2534	944	1749	2187	869	2216	1950	2806
VIT_14s0083g00950	394	354	583	655	430	592	759	445	509	324	342	309	294	319	230	308	337	354
VIT_14s0083g00960	16811	9058	26795	15135	33171	38328	23598	39840	37333	17174	19899	15391	19658	20421	16913	22924	23958	30632
VIT_14s0083g00970	2560	3176	4081	4582	3531	3563	4303	3450	3156	2281	2701	2431	2398	2721	1848	2321	2284	2468
VIT_14s0083g00990	879	555	1548	1024	1313	1422	1479	1635	1452	870	969	895	862	836	731	931	863	1172
VIT_14s0083g01000	621	723	1013	1156	921	1190	1221	1125	1000	664	781	573	598	746	482	691	614	736
VIT_14s0083g01010	497	641	952	1003	880	870	1016	717	635	478	588	616	747	504	528	499	514	479
VIT_14s0083g01020	301	212	446	461	647	489	861	498	460	314	369	343	385	208	355	324	315	346
VIT_14s0083g01030	17	18	42	38	30	28	20	27	43	14	19	15	26	7	20	16	22	7
VIT_14s0083g01050	331	504	635	820	576	644	907	598	500	400	485	618	511	387	548	362	402	360
VIT_14s0083g01070	10	22	22	24	16	21	34	24	15	5	13	22	11	14	11	7	7	6
VIT_14s0083g01090	1045	921	1946	1715	1763	1869	1931	1928	1621	1087	1296	1014	961	1307	815	1184	1116	1296
VIT_14s0083g01110	81	276	187	344	258	250	190	156	174	177	169	337	307	140	225	76	127	67
VIT_14s0083g01130	12	24	34	38	19	25	22	25	17	7	6	60	16	13	19	10	14	17
VIT_14s0083g01140	3759	3308	4722	3844	2567	3333	3627	3297	2172	2601	2698	2238	2188	1627	1250	1933	2079	2624
VIT_14s0083g01160	1952	1993	3765	4505	3294	4626	3788	3933	3564	2340	2467	2841	2629	2253	2564	2363	2185	2300
VIT_14s0083g01170	1438	1229	2849	2507	2389	2323	2827	2978	3027	1432	1476	1898	1547	1235	1805	1799	1811	2102
VIT_14s0083g01180	234	249	374	367	290	408	456	288	328	222	282	256	279	219	193	227	225	239
VIT_14s0083g01200	178	143	283	263	204	299	286	265	289	166	218	102	142	182	93	172	120	198
VIT_14s0068g00110	101	151	109	109	348	189	257	206	151	110	145	164	164	117	127	103	152	85
VIT_14s0068g00210	46	25	44	66	43	53	83	63	38	28	34	36	14	20	36	34	42	25
VIT_14s0068g00220	2621	2230	4845	4654	3798	4805	5330	4504	4223	2925	2874	3003	2757	2673	2348	2834	2810	3215
VIT_14s0068g00230	498	702	934	1135	822	800	954	750	702	482	500	540	485	515	435	570	428	491
VIT_14s0068g00240	1437	976	2615	1798	2753	2830	2169	2867	2609	1476	1756	1729	1673	1541	1574	1540	1693	2055
VIT_14s0068g00250	246	268	367	340	447	367	387	410	400	273	232	277	263	195	293	296	260	239
VIT_14s0068g00290	276	249	568	510	522	546	571	641	591	403	406	289	264	344	218	394	354	338
VIT_14s0068g00300	748	537	1486	1135	1090	1520	978	1561	1283	643	560	940	825	537	700	767	628	1174
VIT_14s0068g00310	118	83	158	102	224	207	207	202	216	130	132	76	100	102	90	136	130	120
VIT_14s0068g00340	364	419	664	498	761	630	807	777	619	434	532	344	384	489	325	474	520	617
VIT_14s0068g00360	210	149	352	349	441	315	510	394	298	244	338	177	227	244	144	274	251	351
VIT_14s0068g00370	11	15	17	12	20	27	25	34	23	10	14	18	4	13	8	13	15	27
VIT_14s0068g00380	6	4	23	11	13	12	32	23	10	13	5	12	11	9	11	5	28	13
VIT_14s0068g00390	1136	1137	1960	2138	1702	2000	2207	1827	1675	1163	1180	1386	1166	1251	998	1130	1108	1071
VIT_14s0068g00400	39	52	84	45	161	83	144	95	72	47	89	86	77	46	51	49	65	48
VIT_14s0068g00410	932	778	1563	1233	1444	1501	1576	1572	1492	953	1099	662	732	1035	617	1120	1020	1084
VIT_14s0068g00420	519	325	897	547	961	970	903	973	978	466	647	522	593	558	574	572	651	602
VIT_14s0068g00430	1604	1109	2642	1644	3590	3280	2645	3435	3117	1773	2136	1714	2117	1862	1769	2227	2471	2550
VIT_14s0068g00500	263	405	473	579	591	564	479	390	328	370	279	800	749	291	541	169	326	227
VIT_14s0068g00510	6	25	12	23	22	16	32	12	4	19	15	23	16	11	6	15	14	2
VIT_14s0068g00520	1827	1834	3572	3729	2738	3382	3227	3294	3008	2022	2199	2238	2007	1848	1696	1833	1846	2207
VIT_14s0068g00630	1743	1059	3039	2013	2640	3958	2327	3376	3590	1651	1908	1798	1755	1878	1672	1849	2215	2848
VIT_14s0068g00640	4084	4340	7232	6507	8703	8674	8122	7646	7394	4928	4870	6033	6143	4074	5613	4678	4827	4776
VIT_14s0068g00650	13	19	19	10	25	18	25	32	26	20	18	5	12	8	10	25	14	6
VIT_14s0068g00660	1819	1488	3245	2776	2775	2905	2978	3067	2858	1796	2268	1653	1615	1831	1408	1846	2108	2249
VIT_14s0068g00670	68	104	273	211	159	232	187	127	159	87	137	118	98	113	109	100	128	117
VIT_14s0068g00680	297	239	528	411	526	508	445	426	403	273	328	521	423	276	568	268	369	276
VIT_14s0068g00690	992	756	1609	1378	1285	1498	1362	1775	1700	889	1007	628	833	1059	659	996	922	1358
VIT_14s0068g00700	273	206	478	381	451	488	533	489	492	255	347	301	248	347	269	353	329	394
VIT_14s0068g00710	867	824	1391	1033	1203	1263	1303	1300	1130	742	904	679	637	964	526	782	800	981
VIT_14s0068g00720	2131	1399	3911	2183	3112	4311	3264	4007	3630	2093	2123	2427	2400	2002	2092	2156	2206	2895
VIT_14s0068g00730	341	386	810	626	602	472	609	534	451	271	347	279	257	369	267	535	413	308
VIT_14s0068g00740	1395	896	2925	2348	1222	2541	2348	2007	2282	918	976	1013	917	1010	901	1282	908	1229
VIT_14s0068g00750	182	235	432	405	310	351	318	386	308	221	237	312	230	292	200	190	214	252
VIT_14s0068g00760	129	84	172	89	174	204	151	245	167	94	173	84	95	132	100	140	135	196
VIT_14s0068g00770	242	232	407	362	338	423	255	430	319	226	283	243	214	255	180	272	274	370
VIT_14s0068g00780	1183	934	2435	2090	1762	2190	2199	2385	2150	1223	1224	1239	1050	1171	1090	1371	1308	1687
VIT_14s0068g00790	1007	1037	2060	1894	1462	1780	1770	1813	1547	956	1260	1238	1027	1119	839	945	935	1019
VIT_14s0068g00800	969	1142	1824	1776	1585	2004	1996	1755	1610	1037	1260	1105	1248	1152	918	1048	1047	1165
VIT_14s0068g00810	644	458	1040	662	1111	1061	833	1182	1055	656	797	504	539	649	489	773	756	900
VIT_14s0068g00830	385	336	593	706	598	709	883	510	519	451	560	394	401	399	397	345	390	443
VIT_14s0068g00840	2400	2053	4575	4287	3691	4765	3684	4251	4357	2332	3097	2959	2454	3094	2591	2785	2972	3701
VIT_14s0068g00850	11197	8159	17407	14798	15550	18348	16321	19224	17633	11030	11748	8972	9705	10081	8246	11052	10464	14290
VIT_14s0068g00870	127	121	162	220	199	204	347	127	171	130	131	130	223	80	133	118	122	95
VIT_14s0068g00880	365	369	527	552	461	510	622	406	355	284	324	398	383	313	310	285	285	253
VIT_14s0068g00890	977	898	1678	1263	1627	1762	1400	1805	1544	1010	1103	988	967	1031	943	1103	1107	1251
VIT_14s0068g00910	423	339	778	659	669	660	644	690	613	436	482	352	373	468	359	376	405	462
VIT_14s0068g00920	3271	2456	7759	5177	7860	3652	6823	5984	4154	2856	3478	6044	3790	3502	4220	4155	3636	7330
VIT_14s0068g00930	379	350	753	484	905	419	690	634	503	359	337	453	331	293	430	507	480	518
VIT_14s0068g00940	37	25	40	89	54	68	68	63	67	45	48	82	40	43	43	58	39	49
VIT_14s0068g00950	24	9	20	0	31	31	16	43	30	10	18	10	16	15	13	21	29	20
VIT_14s0068g00970	288	133	339	202	315	343	333	367	357	255	360	131	180	213	117	299	266	448
VIT_14s0068g00980	324	170	424	468	439	570	483	586	544	277	355	386	270	309	356	320	316	487
VIT_14s0068g00990	36	26	89	99	35	72	68	71	62	42	30	49	42	33	41	27	31	39
VIT_14s0068g01000	1165	751	1888	1344	1985	2442	1829	2420	2125	1019	1223	1087	1284	1232	1104	1239	1440	1894
VIT_14s0068g01010	622	398	975	552	888	1109	779	1146	1116	569	683	467	541	587	435	645	699	922
VIT_14s0068g01020	68	41	64	57	95	104	72	93	72	39	41	79	52	39	50	53	53	44
VIT_14s0068g01030	1463	1663	2949	2761	2649	2951	2870	2706	2483	1647	1825	2101	1638	1689	1391	1557	1746	1768
VIT_14s0068g01040	14	7	35	14	11	16	13	23	22	13	12	8	6	7	13	23	21	14
VIT_14s0068g01050	261	311	415	459	340	413	430	394	340	221	297	249	254	203	183	254	248	259
VIT_14s0068g01060	240	242	548	552	430	473	396	508	444	251	308	300	281	335	227	263	307	320
VIT_14s0068g01070	54	41	68	40	110	87	100	79	77	63	82	47	57	55	52	73	74	59
VIT_14s0068g01090	164	131	243	279	289	304	364	248	239	166	187	170	222	172	129	180	177	185
VIT_14s0068g01100	683	745	1153	1149	1130	1059	1386	1119	910	710	769	797	650	797	597	702	736	830
VIT_14s0068g01110	719	519	1038	790	1069	1198	1094	996	1023	573	699	616	761	625	624	603	707	784
VIT_14s0068g01120	215	202	342	402	485	490	545	347	433	223	283	377	424	231	379	244	325	264
VIT_14s0068g01130	2751	2028	5556	3668	4153	5396	4277	5621	5228	2780	3204	2927	2273	3372	2689	3261	3281	4407
VIT_14s0068g01140	58	40	92	93	74	89	82	77	70	57	54	45	63	31	29	49	28	54
VIT_14s0068g01150	143	106	183	177	185	183	258	172	188	102	149	60	106	142	48	133	113	167
VIT_14s0068g01170	50	26	67	54	70	76	65	67	74	61	43	43	44	39	29	69	48	57
VIT_14s0068g01180	607	761	1102	1136	842	937	1183	1021	855	636	611	711	558	655	446	662	605	727
VIT_14s0068g01190	615	474	990	781	843	773	966	1150	1024	553	559	644	488	471	574	637	556	780
VIT_14s0068g01200	359	172	530	349	309	517	360	391	417	215	237	437	409	179	310	228	310	342
VIT_14s0068g01210	100	116	170	398	305	276	292	203	215	145	115	655	335	74	333	118	127	122
VIT_14s0068g01230	341	232	525	513	566	632	439	554	495	295	302	413	318	311	357	314	295	353
VIT_14s0068g01240	75	47	79	78	160	151	158	173	129	81	96	38	93	89	51	83	71	103
VIT_14s0068g01250	260	125	512	216	376	386	439	498	554	232	209	313	217	164	283	298	342	434
VIT_14s0068g01260	1923	1505	3985	2725	3121	3276	4173	3622	3267	1963	2144	2175	1867	2316	1747	2118	2080	2423
VIT_14s0068g01270	81	82	265	286	157	147	246	179	182	129	144	171	104	109	131	126	122	133
VIT_14s0068g01280	4279	4191	8051	5917	6416	7354	7341	7329	6331	3968	4918	3911	4422	4955	3368	4278	4174	4975
VIT_14s0068g01300	642	400	1118	1169	894	969	1150	1137	1347	635	534	1071	729	376	810	567	685	830
VIT_14s0068g01310	330	414	692	540	485	515	765	569	572	428	370	263	307	352	282	385	363	416
VIT_14s0068g01320	21	45	63	60	38	50	53	60	34	29	45	27	24	33	20	39	30	36
VIT_14s0068g01330	4068	5247	8983	7802	6359	8410	8801	6445	6467	4415	4643	4393	5504	4037	3730	3743	4287	4503
VIT_14s0068g01340	1028	994	1793	1968	1559	1468	1804	1561	1516	933	1197	1262	1019	1016	856	948	1039	1201
VIT_14s0068g01350	116	44	197	185	148	186	153	189	178	111	72	163	161	55	136	93	85	151
VIT_14s0068g01360	13226	8592	19033	28234	16953	17849	15620	21435	17624	12844	10797	22127	13291	6974	13344	12346	9403	12553
VIT_14s0068g01370	1406	1568	2440	2402	1971	2315	2405	2206	1893	1278	1505	1535	1440	1413	1154	1338	1391	1415
VIT_14s0068g01380	75	69	88	75	90	94	70	88	59	51	45	119	74	71	72	42	62	64
VIT_14s0068g01400	717	1112	1388	1426	860	1170	1541	1196	912	697	739	853	826	672	527	596	623	651
VIT_14s0068g01430	250	213	415	390	512	503	587	402	506	221	279	348	335	264	315	241	274	308
VIT_14s0068g01440	473	295	824	548	790	947	751	1031	1010	414	457	453	429	439	405	528	632	717
VIT_14s0068g01450	380	287	678	394	530	629	576	551	577	301	366	311	329	322	273	335	291	455
VIT_14s0068g01460	375	410	734	725	654	601	786	641	554	343	507	490	446	421	330	372	398	420
VIT_14s0068g01470	1550	1127	2667	1838	2660	2618	1961	2896	2756	1648	1619	1341	1498	1696	1241	1633	1739	2219
VIT_14s0068g01490	1025	1050	2005	1413	1267	890	1726	1804	1747	1131	795	635	596	531	436	1335	852	1086
VIT_14s0068g01500	1646	995	1658	1680	1123	1244	1714	1645	1311	1065	790	1629	970	454	890	846	970	1115
VIT_14s0068g01510	102	98	180	190	150	150	184	140	118	86	115	100	84	97	85	117	100	74
VIT_14s0068g01530	2028	1685	3136	2416	3129	3507	3172	3219	2904	1971	2232	1999	2220	1689	1678	1938	1880	2223
VIT_14s0068g01540	245	150	353	345	291	268	330	485	388	232	239	175	167	214	83	275	149	286
VIT_14s0068g01550	100	99	181	132	153	182	186	206	186	101	103	81	74	116	72	101	123	130
VIT_14s0068g01560	806	623	1500	1309	1238	1293	1003	1527	1220	722	917	732	676	861	591	818	805	1077
VIT_14s0068g01590	1109	942	1924	1545	1760	2130	1962	1799	1858	1085	1177	1183	1334	996	1108	1036	1175	1287
VIT_14s0068g01630	183	157	325	337	286	318	364	360	320	178	196	232	281	180	210	230	194	257
VIT_14s0068g01640	1525	1776	2602	2215	1971	2073	2568	2205	1779	1351	1421	1287	1300	1662	1161	1387	1333	1542
VIT_14s0068g01650	4717	2698	7331	4020	7433	8934	6310	9215	8167	4495	4964	3844	4645	4707	3875	5560	5375	6906
VIT_14s0068g01660	73	86	164	139	185	157	130	204	130	85	107	106	90	94	87	112	119	132
VIT_14s0068g01670	334	218	468	532	568	510	528	642	504	330	356	410	395	282	358	345	246	361
VIT_14s0068g01690	632	512	1264	1183	1043	1078	1150	1041	1054	751	914	594	607	823	516	847	739	946
VIT_14s0068g01710	1561	1362	2837	2262	2380	2638	2651	2729	2733	1486	1820	1377	1638	1552	1425	1641	1743	2041
VIT_14s0068g01720	56	40	106	101	95	113	105	97	73	48	54	113	73	34	86	52	62	69
VIT_14s0068g01730	302	315	490	460	358	525	419	384	423	280	292	375	324	266	270	247	279	305
VIT_14s0068g01760	8941	6987	14179	11816	10825	11368	13687	12123	9620	7851	7396	11653	9154	4586	8475	6436	6784	9179
VIT_14s0068g01770	6	16	28	17	19	24	37	28	34	14	25	11	7	5	6	10	13	17
VIT_14s0068g01780	22	5	48	52	35	46	43	37	36	24	10	19	12	20	28	18	20	38
ENSRNA049470309	42	43	72	86	34	74	77	52	54	32	55	48	37	30	27	43	34	35
VIT_14s0068g01790	6	6	3	13	3	7	8	1	3	4	5	33	14	2	2	1	8	2
VIT_14s0068g01800	149	128	242	319	169	191	242	271	184	128	148	146	170	101	118	147	112	141
VIT_14s0068g01820	11	13	11	26	18	29	21	24	14	9	18	18	23	10	7	8	15	19
VIT_14s0068g01830	183	205	391	493	314	361	380	367	249	184	200	353	213	226	210	222	181	198
VIT_14s0068g01840	1645	2247	2940	3081	2168	2650	2922	2347	1827	1277	1896	1766	1692	1949	1174	1332	1473	1490
VIT_14s0068g01850	45	40	53	90	46	101	44	66	37	27	39	56	41	42	24	40	26	38
VIT_14s0068g01860	13	28	20	34	21	25	24	13	24	11	11	22	16	22	20	14	13	5
VIT_14s0068g01870	1137	1215	2182	2015	2016	2552	2090	1690	1690	937	1077	2326	2266	750	1836	765	997	907
VIT_14s0068g01890	927	720	2234	1419	1135	2140	1263	1967	1753	766	825	955	717	789	701	928	777	887
VIT_14s0068g01930	271	269	421	453	388	377	363	409	364	234	291	271	261	231	237	239	238	308
VIT_14s0068g01940	2190	2877	3707	4896	3093	3541	4593	3300	2633	2136	2470	2791	2388	2276	2131	1926	1907	2194
VIT_14s0068g01950	291	283	505	484	451	409	469	336	294	241	302	398	323	222	339	191	283	219
VIT_14s0068g01960	1765	1403	3103	2358	2866	3579	2892	2958	2941	1674	2139	2094	1864	1958	1699	1779	1738	1919
VIT_14s0068g01970	80	47	89	92	100	89	131	119	47	55	59	120	92	41	50	44	51	79
VIT_14s0068g01990	14	21	22	17	28	29	42	25	23	23	24	4	19	15	8	17	29	38
VIT_14s0068g02000	24	64	27	48	75	40	71	80	21	42	43	17	25	45	13	26	20	26
VIT_14s0068g02010	33	18	61	50	43	47	45	89	44	44	37	40	20	27	34	30	43	52
VIT_14s0068g02020	467	478	912	828	638	833	838	722	697	417	559	524	464	481	397	487	528	530
VIT_14s0068g02030	2479	2781	4661	4079	2971	3924	3806	3759	3338	2270	2406	2199	1990	2430	1895	2448	2167	2760
VIT_14s0068g02040	1331	1414	1976	2187	1981	2034	2642	2079	1888	1159	1264	1600	1509	1371	1189	1346	1215	1412
VIT_14s0068g02050	138	177	240	365	177	213	418	162	189	155	154	217	201	164	160	114	136	118
VIT_14s0068g02060	1121	1349	1790	2033	1383	1522	2214	1503	1376	1086	1188	1026	954	1084	823	982	947	1142
VIT_14s0068g02070	663	493	922	957	850	978	1114	1028	998	604	750	633	598	597	482	614	690	765
VIT_14s0068g02080	24	4	36	32	39	47	31	37	12	22	14	24	20	32	15	20	20	22
VIT_14s0068g02090	17	22	57	64	32	31	59	23	42	20	27	12	18	23	20	17	21	27
VIT_14s0068g02110	1129	1202	1977	1836	1768	1907	2247	1815	1507	1194	1326	1522	1376	1241	1200	984	1160	1318
VIT_14s0068g02120	940	661	1212	1123	1025	1387	1546	1144	1023	767	923	747	957	587	521	585	669	784
VIT_14s0068g02130	677	458	1145	789	878	1173	1128	1018	857	626	662	592	652	610	525	646	635	776
VIT_14s0068g02140	1449	1180	2492	2019	2370	2632	2865	2625	2397	1452	1686	1442	1555	1480	1256	1545	1712	1960
VIT_14s0068g02150	8311	4446	14136	8745	9474	10300	11806	13119	12231	6291	6471	6223	6157	4328	5564	7748	6747	10669
VIT_14s0068g02160	147	182	255	288	250	231	316	171	150	157	170	273	261	157	172	99	152	140
VIT_14s0068g02190	426	381	1051	618	500	862	664	713	927	338	308	821	450	256	616	408	473	441
VIT_14s0068g02200	84	122	267	141	168	207	203	165	217	92	108	142	140	134	158	132	159	153
VIT_14s0068g02240	150	79	166	157	176	123	194	241	188	80	132	53	47	76	96	169	99	127
VIT_14s0171g00040	16	12	19	18	42	41	16	17	15	16	17	32	40	15	22	17	15	23
VIT_14s0171g00080	223	209	418	444	224	318	421	299	250	194	255	314	242	158	217	155	224	188
VIT_14s0171g00090	1285	966	2008	1522	1642	2248	2009	1868	1650	1086	1307	1469	1428	1063	1275	1117	1530	1581
VIT_14s0171g00100	3434	3419	6474	4880	3141	5147	4633	3811	3704	2173	2939	2499	3005	2436	1881	2259	2180	3025
VIT_14s0171g00120	2490	2891	4684	5391	4523	4958	5973	4048	3504	2826	3183	4675	3717	2492	3509	2401	2782	2786
VIT_14s0171g00130	281	280	524	454	532	474	509	527	469	233	288	322	366	276	327	346	360	413
VIT_14s0171g00140	232	175	548	381	389	409	397	480	420	227	297	257	207	256	231	336	337	354
VIT_14s0171g00150	268	183	462	425	276	319	458	446	432	221	235	299	254	158	202	213	182	242
VIT_14s0171g00160	1250	1784	2038	2862	2073	2329	2425	2019	1776	1449	1353	2271	1776	1442	1418	1172	1249	943
VIT_14s0171g00170	382	206	775	401	646	715	600	782	590	386	514	302	330	456	310	483	381	610
VIT_14s0171g00180	185	194	214	255	538	459	463	281	270	211	295	232	434	202	216	174	170	142
VIT_14s0171g00190	343	327	601	626	529	582	705	567	561	338	368	407	342	423	304	378	376	405
VIT_14s0171g00220	336	261	597	482	515	407	605	499	427	288	377	214	287	335	198	336	354	331
VIT_14s0171g00230	202	198	344	313	357	356	335	322	324	209	275	156	168	238	135	244	230	262
VIT_14s0171g00240	13	22	34	19	35	27	31	38	26	26	20	20	11	22	16	29	30	16
VIT_14s0171g00250	202	204	338	449	299	344	431	312	318	199	231	232	193	177	185	201	192	193
VIT_14s0171g00260	1863	1853	3158	3021	2335	2717	3590	2459	2447	1501	1953	1663	1722	2019	1528	1714	1667	1871
VIT_14s0171g00270	2055	1714	3413	3491	2576	3239	3367	3204	2896	1747	2313	1853	1979	2284	1687	1991	2019	2532
VIT_14s0171g00280	3755	2249	6360	3277	5931	6968	6124	7315	6591	3452	3885	3087	3386	3910	3069	4350	3793	5310
VIT_14s0171g00300	28	34	34	45	49	98	38	48	51	34	29	34	28	22	21	26	31	24
VIT_14s0171g00310	824	805	1556	1264	1281	1509	1087	1496	1387	705	900	804	755	930	783	883	938	987
VIT_14s0171g00320	1444	1012	1731	1582	1631	1538	1797	1613	1156	1203	1313	816	1080	979	540	1113	1016	1301
VIT_14s0171g00330	1301	1320	2422	2594	1880	2126	2256	2096	1791	1182	1336	1265	1265	1386	956	1287	1193	1388
VIT_14s0171g00340	664	617	1403	1306	967	1430	1221	1353	1096	795	769	819	722	797	683	736	649	948
VIT_14s0171g00350	30	20	13	15	69	82	41	111	60	33	40	12	24	31	19	50	55	90
VIT_14s0171g00360	987	746	1436	1060	1308	1281	1514	1490	1286	818	922	639	769	784	563	980	945	1104
VIT_14s0171g00370	99	77	162	122	104	153	191	141	133	87	108	70	91	80	66	65	95	99
VIT_14s0171g00380	2254	1666	3255	3068	3885	3708	4436	4036	3254	2233	2432	3012	2606	2060	2363	2482	2557	2911
VIT_14s0171g00390	160	152	280	296	213	245	278	278	208	107	170	180	176	159	105	132	170	182
VIT_14s0171g00400	4769	4989	9627	6831	7985	7178	7735	10058	9249	6259	5107	5887	4641	3741	4479	5846	5119	6220
VIT_14s0171g00410	3181	3649	5992	6585	4664	8395	4446	5949	5900	4171	4156	4032	4095	3383	2810	3297	3720	3885
VIT_14s0171g00420	344	370	608	583	514	494	568	511	399	302	395	324	325	388	301	318	346	398
VIT_14s0171g00430	1513	1321	2965	2180	2278	2136	2421	2340	2017	1356	1585	1149	1170	1562	967	1533	1424	1596
VIT_14s0171g00440	25	31	53	53	47	36	74	41	46	28	29	39	49	35	39	33	22	25
VIT_14s0171g00450	1010	723	1601	1290	1813	2030	1643	1841	1904	987	1086	1044	1211	991	1116	1135	1256	1453
VIT_14s0171g00460	2026	1841	3102	2968	2750	2892	3661	3016	2755	1862	2071	1901	1910	1998	1633	1929	1891	2055
VIT_14s0171g00470	764	832	1975	2161	1247	1600	1902	1480	1224	1000	1137	990	825	976	674	828	827	1084
VIT_14s0171g00480	1694	1158	2828	1684	2821	3156	2758	3312	2718	1962	2025	1518	1521	1929	1296	1903	1837	2398
VIT_14s0171g00490	4927	4332	9305	8004	8083	8375	8903	9121	8414	4713	5319	6907	5330	4838	5699	5269	5587	6151
VIT_14s0171g00500	96	33	85	95	183	109	69	197	131	68	54	124	86	78	85	79	66	145
VIT_14s0171g00510	2106	2105	3224	4053	3036	3157	3607	3112	2686	2028	2347	2677	2159	1833	1890	1826	1791	2267
VIT_14s0171g00520	2446	1770	4136	2838	3372	4379	3580	4612	4393	2229	2569	2076	2334	2503	1793	2505	2838	3437
VIT_14s0171g00530	2172	1617	3675	2395	3887	4743	3040	4572	4127	2308	2587	1804	2393	2285	2013	2599	2459	3263
VIT_14s0219g00010	1316	1115	2577	2645	1920	2380	2556	2355	2217	1573	1594	1291	1333	1316	1119	1349	1409	1597
VIT_14s0219g00020	780	683	1346	999	1071	1267	1237	1207	1134	757	851	602	707	779	505	818	748	931
VIT_14s0219g00030	33	21	49	83	40	28	55	49	48	31	28	33	43	35	31	27	34	48
VIT_14s0219g00040	1118	1121	2172	2019	2567	2443	2074	2083	1868	1172	1153	2168	1715	901	1780	1121	1213	1598
VIT_14s0219g00060	44	56	86	86	63	93	85	83	57	36	49	32	42	48	23	40	32	72
VIT_14s0219g00070	206	179	305	274	236	281	310	291	253	168	174	149	171	180	132	190	164	208
VIT_14s0219g00080	448	332	717	497	855	776	761	751	761	402	600	381	473	444	356	522	549	584
VIT_14s0219g00090	14	21	32	37	41	17	39	23	42	31	15	20	14	17	25	26	22	28
VIT_14s0219g00110	5778	6080	9524	10464	9570	9932	14224	9161	7454	6330	6777	9164	6480	6319	6066	5985	5717	6162
VIT_14s0219g00120	2336	2996	3917	5145	3141	4094	3878	3296	2922	2237	2346	3635	3035	1910	2557	1807	2052	2042
VIT_14s0219g00140	403	412	638	548	559	659	668	539	536	364	400	366	353	393	313	368	368	409
VIT_14s0219g00150	7491	7337	12929	12498	11150	11405	11964	12006	9782	6694	7519	7451	7039	8117	6100	7100	7093	7605
VIT_14s0219g00170	401	399	735	748	620	709	758	587	594	452	520	423	475	372	366	432	438	452
VIT_14s0219g00180	11	9	37	45	38	47	42	30	25	19	25	26	29	14	28	10	21	33
VIT_14s0219g00190	1802	1601	3513	2924	2905	3687	3379	3414	3162	1847	1995	1981	2158	1933	1953	1867	1922	2275
VIT_14s0219g00200	250	252	529	454	484	481	479	488	478	309	314	293	310	263	256	261	299	313
VIT_14s0219g00210	95	122	153	230	197	182	434	144	159	116	215	86	137	149	85	104	81	105
VIT_14s0219g00220	176	230	309	204	360	264	395	227	245	220	208	170	246	174	144	170	228	172
VIT_14s0219g00250	449	455	754	754	482	682	827	627	574	406	469	360	383	406	195	394	393	456
VIT_14s0219g00290	229	188	374	397	381	363	443	341	348	233	277	212	199	276	200	224	245	285
VIT_14s0066g00140	931	1050	1495	1516	1610	1457	1731	1449	1234	1043	1025	1289	1180	965	971	861	935	1043
VIT_14s0066g00150	112	110	166	170	161	138	194	167	106	72	113	117	105	103	60	94	109	116
VIT_14s0066g00170	422	260	816	783	577	683	685	760	700	397	385	627	456	456	449	404	400	620
VIT_14s0066g00180	1369	1204	2211	2005	1734	1968	1775	1979	1986	1172	1371	1141	1139	1131	957	1342	1132	1497
VIT_14s0066g00190	33	22	76	83	21	56	48	40	54	39	23	16	16	12	23	39	34	48
VIT_14s0066g00200	218	183	341	327	311	348	452	327	292	173	276	146	156	225	137	213	219	205
VIT_14s0066g00210	207	247	349	343	292	364	473	353	340	207	235	152	212	209	227	219	219	240
VIT_14s0066g00220	1084	1054	2083	1621	2337	2024	2191	2066	1902	1244	1544	1475	1505	1292	1347	1206	1323	1229
VIT_14s0066g00240	51	44	71	62	57	56	61	58	67	59	43	41	22	51	17	35	52	63
VIT_14s0066g00250	143	364	308	362	291	342	255	243	223	188	107	247	243	134	192	182	150	117
VIT_14s0066g00260	880	800	1605	1347	1270	1459	1914	1403	1186	879	931	938	798	987	753	878	931	1044
VIT_14s0066g00270	597	457	954	756	961	974	1143	1037	1047	604	661	445	472	660	408	697	643	741
VIT_14s0066g00290	1886	1526	3332	3732	2739	3404	3614	3188	2975	1912	1949	2769	2137	1470	1963	1792	1994	2115
VIT_14s0066g00310	671	582	1172	863	955	1068	1233	1092	1103	625	684	510	588	690	519	625	691	818
VIT_14s0066g00320	325	208	493	420	493	478	556	477	408	316	367	197	304	284	212	288	286	309
VIT_14s0066g00330	76	130	135	183	128	95	189	128	128	67	77	94	77	103	76	90	63	79
VIT_14s0066g00340	470	349	758	641	533	597	698	577	682	340	332	479	338	282	370	379	380	472
VIT_14s0066g00350	111	103	182	253	189	228	267	216	176	115	148	157	138	145	116	139	121	127
VIT_14s0066g00360	371	214	543	469	483	441	618	560	505	279	370	202	235	346	170	364	361	399
VIT_14s0066g00370	979	1046	1542	1593	1613	1507	1536	1735	1533	1187	1015	914	1022	911	775	911	895	1016
VIT_14s0066g00390	357	433	613	556	449	558	704	501	482	323	354	301	323	355	259	326	399	339
VIT_14s0066g00400	35	28	62	81	136	52	92	62	49	38	57	213	106	55	150	28	56	19
VIT_14s0066g00410	1054	1060	2009	1999	1698	2390	2156	1577	1594	1179	1301	1739	1693	1313	1347	1051	1286	1288
VIT_14s0066g00420	245	178	363	342	486	478	448	473	461	228	304	238	301	239	224	293	292	319
VIT_14s0066g00450	3638	3927	6108	5623	4617	6216	6494	5409	4862	3396	3352	3995	3691	3851	3476	3570	3437	4012
VIT_14s0066g00460	1226	1041	2220	1965	2045	3181	2101	2198	2265	1362	1440	1799	1885	1323	1340	1177	1273	1272
VIT_14s0066g00470	28	27	48	38	36	43	41	36	29	24	21	29	20	26	11	23	29	15
VIT_14s0066g00480	435	394	740	640	655	781	770	734	638	422	542	442	455	393	361	443	498	468
VIT_14s0066g00490	215	210	471	301	500	472	544	473	451	279	321	335	321	276	331	316	356	308
VIT_14s0066g00500	19	24	27	16	59	62	30	55	49	21	27	29	47	32	24	35	43	34
VIT_14s0066g00540	41	30	44	30	110	70	53	56	79	32	48	27	47	49	62	63	58	63
VIT_14s0066g00550	46	31	52	29	58	48	61	41	39	40	54	44	43	30	53	35	53	32
VIT_14s0066g00560	597	746	919	1241	748	808	1038	814	557	621	632	998	752	563	616	511	540	560
VIT_14s0066g00580	492	432	974	714	719	844	850	948	835	486	582	422	494	537	393	530	554	665
VIT_14s0066g00590	1815	1504	3681	2732	2913	3441	3920	3613	3019	1878	2303	1897	2087	1701	1558	1982	1967	2577
VIT_14s0066g00600	21	5	50	57	41	27	42	26	12	18	16	29	29	29	25	16	16	13
VIT_14s0066g00610	7467	3275	11493	7307	12149	15403	12416	14393	13230	6889	8753	8632	9797	6417	8905	8281	9401	14365
VIT_14s0066g00640	1387	953	2155	1620	2410	2165	2178	2377	1994	1287	1433	1309	1275	1288	1150	1466	1392	1617
VIT_14s0066g00660	81	79	177	174	120	166	168	127	134	66	87	86	97	72	99	77	94	92
VIT_14s0066g00670	307	227	532	313	407	524	398	465	579	232	244	252	253	276	217	267	327	373
VIT_14s0066g00700	2641	3708	5486	4405	2925	3917	2987	4204	3428	2234	2604	1809	1722	2500	1286	2873	2120	3025
VIT_14s0066g00710	41	13	99	49	56	52	67	67	75	28	56	41	42	22	21	43	38	91
VIT_14s0066g00720	190	153	309	265	297	318	297	316	261	169	250	195	201	248	152	207	231	237
VIT_14s0066g00730	88	22	78	33	108	139	81	151	127	42	76	39	67	129	45	85	109	131
VIT_14s0066g00740	158	78	254	216	208	241	346	249	220	147	184	129	148	182	120	171	170	236
VIT_14s0066g00780	14	21	28	28	30	22	24	24	33	21	25	10	24	27	13	24	44	29
VIT_14s0066g00790	2050	1502	3444	2483	3367	3994	3515	4108	3769	2167	2502	2059	2134	2205	1936	2463	2443	3138
VIT_14s0066g00800	15597	11170	27675	26658	25110	25995	21109	27206	22418	15160	16051	23229	16635	13845	14401	14712	14471	17636
VIT_14s0066g00810	680	860	1663	1133	2987	1490	2068	1227	1427	814	793	1496	1549	580	1198	965	1030	901
VIT_14s0066g00820	273	286	452	444	396	506	466	463	525	281	296	266	193	339	226	300	278	300
VIT_14s0066g00830	150	124	239	175	200	190	267	174	165	107	135	146	151	137	96	148	127	133
VIT_14s0066g00840	233	179	312	321	258	297	360	292	218	166	212	184	186	176	146	163	201	205
VIT_14s0066g00850	123	71	176	310	236	294	171	192	202	159	123	360	322	93	332	90	146	123
VIT_14s0066g00860	26	16	38	32	31	55	51	52	31	29	37	27	44	19	19	17	33	45
VIT_14s0066g00870	236	111	289	186	258	317	311	266	306	188	243	173	188	164	201	194	207	227
VIT_14s0066g00880	79	27	88	61	79	94	105	123	98	36	62	30	53	47	38	62	59	89
VIT_14s0066g00900	65	55	62	64	125	57	90	97	85	57	47	38	48	53	33	60	38	54
VIT_14s0066g00920	165	100	309	170	317	286	299	347	296	166	191	108	188	230	93	217	181	234
VIT_14s0066g00950	1308	1082	2232	1930	1937	2191	2161	2038	1838	1035	1352	1223	1125	1328	1096	1265	1266	1666
VIT_14s0066g00960	3061	4790	4960	5552	4221	4216	6163	3899	3706	2682	2814	4453	3400	2809	2994	2673	2767	2088
VIT_14s0066g00970	29	32	73	69	67	76	72	51	40	23	43	50	44	31	34	25	31	49
VIT_14s0066g00980	139	118	241	263	222	184	199	205	247	152	155	174	152	167	113	141	128	196
VIT_14s0066g00990	140	119	271	297	247	289	288	229	271	150	159	150	136	157	130	153	155	167
VIT_14s0066g01020	13908	10742	23508	17219	24267	26747	25406	26625	23958	15515	15502	18954	17430	13854	15617	15252	17826	18159
VIT_14s0066g01030	220	169	388	404	365	386	363	375	373	216	224	291	251	225	272	279	254	265
VIT_14s0066g01040	270	235	437	358	383	456	434	442	384	268	304	286	283	237	297	241	300	282
VIT_14s0066g01050	66	56	98	139	106	108	125	125	126	71	94	79	72	75	59	64	73	55
VIT_14s0066g01060	113	89	205	247	128	250	145	188	148	110	107	231	137	136	118	97	96	137
VIT_14s0066g01070	1344	986	2476	2465	2070	2807	2423	2623	2347	1505	1396	2261	1743	1311	1662	1243	1503	1881
VIT_14s0066g01080	20717	22109	38756	41237	26449	33997	42580	32738	30093	19149	21297	27690	21480	20057	20914	18897	20278	22308
VIT_14s0066g01090	1874	1081	3933	3309	2864	2630	4173	3320	2617	1674	3282	1378	1028	2458	1249	2273	3053	3586
VIT_14s0066g01100	280	226	494	508	486	487	571	476	460	312	347	290	319	280	207	241	326	351
VIT_14s0066g01110	934	968	1732	1850	1771	1794	2322	1592	1328	1073	1192	1539	1381	1022	1072	908	1038	1038
VIT_14s0066g01120	3345	1857	5172	3652	4546	5635	4619	5820	5485	3113	3111	3004	3168	2846	2545	3312	3510	4505
VIT_14s0066g01130	510	745	872	1010	863	965	1147	878	743	582	573	715	599	563	493	468	491	479
VIT_14s0066g01140	286	422	686	656	501	669	665	661	441	356	498	264	244	540	160	377	311	318
ENSRNA049470252	67	69	162	195	84	118	155	135	100	83	103	54	42	72	26	81	73	83
VIT_14s0066g01150	2173	1949	3029	2910	2762	2103	4449	2762	2853	2087	2077	2827	2425	777	1608	1757	1679	1782
VIT_14s0066g01160	132	133	220	269	174	206	225	178	119	102	125	145	98	137	117	106	82	127
VIT_14s0066g01170	2566	1965	4309	3144	4000	4473	4018	4547	4375	2424	2926	2597	2714	2438	2436	2585	2680	3336
VIT_14s0066g01180	836	770	1491	1144	1665	1832	1363	1436	1513	817	999	1333	1408	846	1131	734	1028	917
VIT_14s0066g01190	4487	3906	6604	9536	6178	5959	9240	7952	5600	5568	4562	4612	4389	3704	3183	5210	3308	4939
VIT_14s0066g01200	983	913	1815	1781	1738	1995	1919	2049	1831	1154	1375	1042	895	1337	912	1264	1217	1489
VIT_14s0066g01210	217	269	387	509	423	426	528	359	291	324	311	256	411	181	253	268	238	235
VIT_14s0066g01220	7	16	23	24	37	20	30	28	27	21	25	35	21	7	18	15	15	21
VIT_14s0066g01230	387	369	632	620	787	712	766	680	624	366	429	459	356	452	349	419	444	474
VIT_14s0066g01240	746	661	1197	1046	1544	1110	1498	1448	1255	736	788	1033	1058	543	1013	955	906	884
VIT_14s0066g01280	23	28	42	44	47	77	41	43	63	30	20	57	53	23	42	30	23	26
VIT_14s0066g01290	22	26	46	80	66	76	75	50	44	52	35	49	53	43	53	33	29	36
VIT_14s0066g01300	179	174	349	435	304	367	349	384	327	201	216	212	239	188	168	207	153	207
VIT_14s0066g01310	347	422	742	493	645	752	703	727	710	322	459	470	420	542	400	438	433	460
VIT_14s0066g01320	4467	5821	8708	7663	7348	8033	8613	6414	6457	3852	4314	7812	6100	4656	5556	3851	4795	4431
VIT_14s0066g01330	88	94	191	99	169	191	190	197	188	73	112	94	97	111	117	107	99	126
VIT_14s0066g01340	8102	11090	14702	13001	12251	14210	15945	13374	12933	8897	8961	9394	9463	8527	7088	8585	8257	8328
VIT_14s0066g01350	1770	2678	3662	3972	2736	3232	4433	2981	2669	1627	2139	2451	2282	1833	1735	1751	1799	1697
VIT_14s0066g01360	50	24	97	60	56	98	80	75	76	29	32	47	59	33	57	37	43	56
VIT_14s0066g01370	276	161	428	391	371	389	464	329	359	180	279	253	274	220	209	245	245	373
VIT_14s0066g01380	78	96	104	158	125	125	131	118	80	53	73	88	94	88	90	53	67	51
VIT_14s0066g01390	452	357	723	751	631	881	826	761	795	441	604	390	348	741	401	506	534	588
VIT_14s0066g01400	160	169	256	306	357	325	445	284	208	172	169	300	294	190	271	160	195	154
VIT_14s0066g01410	69	58	127	121	130	153	130	101	128	74	62	141	104	81	131	69	90	69
VIT_14s0066g01420	14	20	26	35	50	20	45	22	15	10	14	72	47	7	26	6	16	10
VIT_14s0066g01430	66	38	86	88	82	93	95	109	111	66	64	46	42	86	45	88	78	85
VIT_14s0066g01440	3189	3270	5696	7493	5262	6420	7381	5437	4982	3822	3408	6643	3883	4224	3758	3469	3431	3737
VIT_14s0066g01450	2259	1275	3563	2190	3850	4050	2965	4562	4245	2232	2502	1951	2130	2165	1948	2783	3040	3954
VIT_14s0066g01460	604	729	1195	1205	974	955	1178	1017	863	663	769	547	577	752	546	636	557	788
VIT_14s0066g01530	1929	2419	3655	3877	2755	3444	4941	3232	2984	2262	2137	2300	2067	2085	1956	2054	2101	2075
VIT_14s0066g01540	109	40	192	252	148	246	213	137	183	115	94	201	139	59	129	74	119	165
VIT_14s0066g01550	3861	2583	5514	4822	3951	5443	5341	4976	4980	2956	3095	2789	2436	2955	2316	3111	3036	4181
VIT_14s0066g01560	124	73	172	137	180	184	177	182	174	118	99	134	128	75	132	109	145	130
VIT_14s0066g01570	66	119	140	70	151	72	180	121	78	46	68	79	82	46	54	80	67	37
VIT_14s0066g01580	1318	886	2910	1928	2235	2593	3210	2886	2718	1298	1609	1676	1601	1237	1738	1526	1627	2136
VIT_14s0066g01590	18	11	28	28	28	24	48	21	20	19	11	36	23	12	18	17	17	18
VIT_14s0066g01600	558	1090	1029	1495	934	1281	1238	923	764	774	680	1241	991	771	811	479	611	557
VIT_14s0066g01610	542	704	967	1014	769	975	1042	885	798	567	549	746	583	628	502	581	480	585
VIT_14s0066g01620	420	567	773	909	580	618	801	622	523	409	472	440	454	373	374	373	382	401
VIT_14s0066g01630	938	539	1471	1150	1663	1589	1817	1889	1622	1006	1052	866	808	1124	742	1117	1103	1446
VIT_14s0066g01640	6	10	7	10	22	13	16	25	10	9	15	13	11	17	27	3	6	4
VIT_14s0066g01650	491	580	790	879	663	790	675	680	562	413	589	403	481	541	308	408	385	507
VIT_14s0066g01660	926	715	1375	1239	1403	1434	1378	1307	1314	840	995	1007	901	902	845	874	1037	984
VIT_14s0066g01670	19	29	17	7	5	62	22	15	10	29	31	27	19	0	8	8	51	10
VIT_14s0066g01700	522	398	823	946	711	711	892	828	629	472	499	458	464	524	349	503	451	556
VIT_14s0066g01710	2284	1393	3917	2911	2274	3152	3034	3721	2998	2176	1960	1759	1462	1538	1254	1959	1716	2613
VIT_14s0066g01720	10232	6331	18675	10047	17059	20739	15395	20695	19567	9528	11493	10066	11109	10183	10245	12003	13188	16128
VIT_14s0066g01730	28	15	47	58	34	60	45	55	26	24	24	64	19	24	46	29	21	30
VIT_14s0066g01740	197	281	416	495	333	381	446	362	297	248	226	226	196	263	176	254	213	247
VIT_14s0066g01750	365	338	638	618	605	599	744	566	517	346	463	362	386	415	326	445	429	468
VIT_14s0066g01780	169	115	267	228	248	233	345	216	217	109	182	141	179	167	163	142	149	168
VIT_14s0066g01790	17	12	23	23	30	20	20	28	14	8	18	14	12	13	9	25	22	13
VIT_14s0066g01800	330	144	431	247	430	597	321	570	524	289	323	277	293	301	277	337	409	432
VIT_14s0066g01810	71	49	143	137	114	98	114	163	123	83	78	75	79	101	61	59	70	84
VIT_14s0066g01820	24	24	49	36	41	30	44	48	39	47	28	29	35	27	13	29	15	21
VIT_14s0066g01830	14	10	29	31	23	17	13	18	27	25	21	17	7	16	10	10	7	16
VIT_14s0066g01850	14	0	5	28	12	10	15	11	10	13	4	21	4	16	10	15	2	18
VIT_14s0066g01870	121	119	279	281	316	314	285	311	278	180	245	157	179	207	151	195	221	202
VIT_14s0066g01880	864	439	559	1017	1275	664	1747	756	464	582	754	936	622	603	375	563	354	544
VIT_14s0066g01890	873	706	1466	1620	1204	1378	1693	1463	1337	949	893	843	768	795	703	872	843	1006
VIT_14s0066g01900	219	235	398	529	377	392	483	348	325	190	293	285	256	236	284	247	262	207
VIT_14s0066g01910	820	498	1145	867	1358	1319	1254	1401	1262	639	881	694	722	816	661	851	898	1271
VIT_14s0066g01920	3494	3590	5860	5722	4358	5324	6268	4935	4390	2800	3129	3663	3461	3006	2691	2674	2909	3653
VIT_14s0066g01930	642	612	1205	884	955	1091	1072	1175	1063	737	735	562	686	617	422	693	566	666
VIT_14s0066g01940	65	60	130	124	88	113	132	118	99	51	73	64	49	80	40	64	54	63
VIT_14s0066g01950	155	73	266	160	143	204	164	244	172	74	112	97	178	126	105	135	211	202
VIT_14s0066g02030	1064	820	1923	1297	1817	2199	1568	2190	1960	1165	1413	1146	1185	1266	877	1228	1259	1435
VIT_14s0066g02060	125	77	99	107	180	104	276	293	197	144	104	67	65	55	59	113	106	104
VIT_14s0066g02090	8	9	22	8	32	1	37	32	21	24	11	15	7	9	5	20	25	15
VIT_14s0066g02120	56	25	45	37	43	35	67	36	34	34	32	14	14	34	13	28	21	46
VIT_14s0066g02170	528	466	672	682	576	648	926	660	517	453	499	384	475	364	347	356	409	418
VIT_14s0066g02180	31	26	85	47	51	62	59	64	30	37	42	36	17	36	34	32	42	43
VIT_14s0066g02190	2074	1454	2882	3106	2283	2558	2805	3224	2766	1947	1692	1567	1530	1428	1165	1780	1388	2084
VIT_14s0066g02200	777	669	1262	982	1030	1286	1170	1369	1152	701	740	805	692	701	606	746	757	940
VIT_14s0066g02210	102	57	147	58	191	220	136	269	202	99	160	73	67	183	77	130	139	187
VIT_14s0066g02220	107	58	175	85	144	191	138	217	224	93	129	42	72	133	50	135	105	152
VIT_14s0066g02230	355	236	676	555	563	659	613	804	631	379	407	261	258	483	274	401	371	513
VIT_14s0066g02240	705	546	1271	1165	1020	1182	1141	1215	1050	664	703	815	675	764	583	721	659	790
VIT_14s0066g02250	490	487	835	699	958	738	1002	865	823	559	594	517	564	448	398	601	649	592
VIT_14s0066g02260	228	209	342	370	413	448	436	345	332	244	232	325	270	216	222	204	238	227
VIT_14s0066g02290	26	8	29	35	19	20	14	29	35	18	17	16	18	21	15	6	17	20
VIT_14s0066g02320	30	40	29	54	64	45	86	55	36	52	26	67	93	14	41	46	14	25
VIT_14s0066g02330	4552	2989	7541	4577	7743	8822	7907	9237	8527	4578	4845	4502	4897	4538	4543	5173	5583	6895
VIT_14s0066g02340	822	588	1141	1191	1143	1079	1465	1132	875	701	882	709	696	788	560	722	754	804
VIT_14s0066g02350	577	337	640	633	582	526	740	727	703	556	427	373	455	237	256	443	300	455
VIT_14s0066g02360	499	472	767	751	717	765	898	714	690	531	580	589	552	425	400	436	527	546
VIT_14s0066g02370	49	54	110	73	87	110	72	68	71	53	43	76	69	49	67	51	50	51
VIT_14s0066g02380	3007	2414	4704	3328	3728	4284	4490	4272	3828	2531	2683	2482	2670	2631	2140	2848	2715	3329
VIT_14s0066g02390	2431	1802	4307	3032	4308	4654	3760	4632	4454	2519	2793	2365	2561	2377	2223	2842	2909	3279
VIT_14s0066g02400	684	592	1158	1055	939	1065	1033	1034	838	638	701	565	572	767	465	631	628	726
VIT_14s0066g02410	710	741	1089	1234	907	1352	1122	939	1093	675	723	882	780	749	637	548	699	709
VIT_14s0066g02440	1308	1151	2315	1988	2332	2246	1836	2255	1967	1229	1500	1423	1562	1247	1274	1273	1465	1440
VIT_14s0066g02450	17	16	34	33	36	22	40	29	29	18	18	20	40	35	12	18	29	14
VIT_14s0066g02470	430	227	401	528	606	435	583	768	455	488	326	419	306	222	277	375	215	363
VIT_14s0066g02510	29	12	36	30	16	30	33	23	28	10	23	11	9	17	14	16	15	11
VIT_14s0066g02530	24	14	22	35	29	27	29	17	17	17	9	20	19	5	17	16	23	20
VIT_14s0066g02540	2305	1228	3646	2100	3606	4401	2985	4582	4268	2213	2137	1990	2315	1974	1991	2402	2809	3320
VIT_14s0066g02550	1404	1246	2493	1993	2152	2725	2808	2870	2826	1335	1583	1018	1141	1788	1068	1809	1617	1670
VIT_14s0066g02560	2636	3179	4291	5007	2954	3791	5838	3663	3074	2828	2590	2782	2002	2390	1794	2167	2393	2319
VIT_14s0066g02590	19	18	23	42	23	41	25	28	27	10	18	14	16	26	20	14	18	17
VIT_14s0066g02600	197	206	391	408	362	437	402	396	405	242	285	201	195	320	206	230	211	274
VIT_14s0066g02610	120	69	157	161	108	110	143	153	143	106	99	82	63	82	48	131	62	75
VIT_14s0066g02620	472	331	834	710	593	666	946	795	702	436	514	329	370	543	302	456	467	583
VIT_14s0066g02630	390	352	492	614	574	653	827	574	523	398	375	397	391	399	320	430	378	362
VIT_14s0108g00010	999	1103	2021	2105	1627	1879	1960	1840	1711	1088	1125	1496	1068	1195	1216	1120	1164	1153
VIT_14s0108g00030	58	60	116	155	165	137	126	96	102	98	88	192	93	108	121	69	75	77
VIT_14s0108g00040	6032	4660	10252	7985	9410	10234	11816	10791	9785	6231	6779	6407	5421	6794	5281	6782	7018	8241
VIT_14s0108g00050	78	31	105	123	91	118	151	114	108	79	90	81	58	43	56	76	63	85
VIT_14s0108g00060	929	647	1834	1445	1327	1743	1440	1963	1894	897	1145	852	829	966	744	1002	1183	1275
VIT_14s0108g00070	168	145	347	331	302	311	398	319	347	190	270	213	207	269	200	237	239	267
VIT_14s0108g00080	3712	3707	7044	5737	5778	6495	6664	5996	5287	3615	4222	3484	3730	3921	3221	3847	3724	4391
VIT_14s0108g00090	1755	790	1776	1531	1502	1589	1890	1828	1128	1333	1560	897	1036	1132	582	1153	1040	1619
VIT_14s0108g00100	56	20	57	67	53	68	88	65	44	41	39	48	52	30	24	47	33	55
VIT_14s0108g00110	221	273	411	444	398	363	341	363	373	213	228	324	244	252	247	218	261	234
VIT_14s0108g00120	14	5	17	18	13	12	16	27	15	22	10	37	10	17	15	15	23	23
VIT_14s0108g00130	400	373	672	583	828	770	759	686	581	423	525	428	486	521	398	479	491	491
VIT_14s0108g00140	8304	9069	15904	21934	13356	17233	17002	14518	13270	9134	10170	14542	9830	9784	9999	8598	9147	10135
VIT_14s0108g00150	232	124	247	267	312	337	471	402	259	159	269	222	181	323	213	240	191	296
VIT_14s0108g00160	26	4	25	9	28	44	18	53	25	19	13	13	19	37	7	25	17	55
VIT_14s0108g00170	13	3	29	8	3	6	21	11	15	4	8	5	3	5	6	9	14	28
VIT_14s0108g00270	86	116	118	76	110	77	130	66	76	53	51	45	93	54	82	76	61	52
VIT_14s0108g00350	27	33	50	46	81	81	76	59	50	28	50	30	35	46	26	33	47	47
VIT_14s0108g00360	9	4	22	14	25	28	16	19	9	10	19	14	20	20	6	12	20	26
VIT_14s0108g00370	26	20	47	92	46	45	65	61	49	38	43	24	27	39	32	37	34	37
VIT_14s0108g00380	85	85	144	145	129	193	145	174	129	104	124	70	88	131	80	106	119	115
VIT_14s0108g00400	67	51	142	145	93	104	153	179	153	136	64	57	54	48	33	90	64	76
VIT_14s0108g00430	158	208	283	250	427	496	406	291	282	200	207	353	458	151	299	186	252	182
VIT_14s0108g00450	2827	1921	3448	3016	2449	3010	4541	3044	2355	1998	2043	1810	2126	1603	1394	2030	1832	2587
VIT_14s0108g00460	2801	3536	5124	5003	4153	4665	4851	3786	3314	2619	2845	3811	3511	3032	2672	2678	2558	2639
VIT_14s0108g00470	249	141	377	282	383	403	400	598	486	227	248	221	247	268	227	323	314	409
VIT_14s0108g00480	1015	1313	2146	2565	1358	2077	1689	1950	1932	1173	1198	1287	1131	1241	959	1178	1048	1303
VIT_14s0108g00490	6080	4385	9891	7956	10838	13168	11914	11693	9983	6582	6544	8556	7636	5447	7333	6552	7234	8718
VIT_14s0108g00500	1102	638	2081	1464	1790	2267	1932	2235	2207	1238	1235	1007	1041	1029	993	1383	1412	1741
VIT_14s0108g00510	2030	1842	2971	2973	3019	2873	3097	2975	2492	1895	2101	2214	2047	2037	1454	1805	1712	2070
VIT_14s0108g00520	30	37	502	448	237	68	137	85	220	67	44	363	658	230	318	19	47	20
VIT_14s0108g00540	540	352	1088	547	795	543	902	892	927	468	362	518	453	297	576	474	556	580
VIT_14s0108g00560	77	28	122	119	134	93	104	105	126	93	82	61	45	120	48	77	78	90
VIT_14s0108g00570	239	107	441	287	311	349	308	456	430	189	254	113	93	237	96	280	253	356
VIT_14s0108g00580	30	17	41	40	44	35	59	41	45	26	44	32	18	24	29	30	24	37
VIT_14s0108g00590	31	15	38	30	47	50	38	38	32	20	27	26	34	14	27	27	26	23
VIT_14s0108g00600	37	26	59	40	43	54	65	51	43	13	33	31	32	37	20	31	42	26
VIT_14s0108g00630	680	379	1240	903	388	597	1002	834	939	215	297	510	276	179	257	623	394	732
VIT_14s0108g00730	327	208	523	380	424	413	498	493	475	268	316	220	208	262	184	359	275	399
VIT_14s0108g00740	40	92	102	90	146	126	102	158	84	57	69	86	85	80	50	63	47	54
VIT_14s0108g00750	40	63	108	163	129	105	121	117	88	93	86	117	118	91	75	49	59	58
VIT_14s0108g00760	122	237	304	411	284	259	376	263	186	188	219	237	246	269	185	187	196	151
VIT_14s0108g00800	49	34	60	95	65	68	95	66	60	46	60	60	49	40	35	32	34	46
VIT_14s0108g00810	4056	5501	7579	11433	7465	9667	11347	7376	6736	5319	6125	8109	7271	4869	5614	3868	4467	4022
VIT_14s0108g00830	202	388	356	702	560	434	705	538	365	386	421	298	359	344	192	369	236	156
VIT_14s0108g00840	721	424	853	943	904	871	808	981	738	657	656	412	501	492	447	645	499	632
VIT_14s0108g00850	785	1123	1309	1548	1177	1321	1516	1190	1010	854	873	1206	1010	836	819	684	741	638
VIT_14s0108g00870	909	898	1580	1729	1520	1601	1496	1622	1413	971	1005	914	843	1159	776	1058	957	979
VIT_14s0108g00890	2602	1673	4134	2822	4103	3957	4320	4387	4371	2503	2278	2649	2659	1741	2408	2625	2414	2827
VIT_14s0108g00930	8	16	14	14	44	16	21	17	10	7	24	14	16	14	16	11	17	6
VIT_14s0108g00940	565	445	934	644	1021	1123	1082	986	920	627	736	636	697	642	683	641	697	727
VIT_14s0108g00950	2889	2563	5056	4560	4990	5185	5463	5239	4631	2957	3327	3041	2893	3495	2500	2975	3199	3650
VIT_14s0108g00970	2888	3326	5529	5276	4408	5090	6052	4463	4294	3098	3269	4004	3814	2973	3261	2735	3113	2950
VIT_14s0108g00980	4033	3574	7334	7542	8140	8785	6679	7563	6493	4529	4872	6409	5754	4439	4947	4241	4687	5132
VIT_14s0108g00990	252	209	493	688	332	569	621	494	394	221	341	248	232	304	164	307	206	299
VIT_14s0108g01000	631	409	975	1014	608	620	1244	817	1198	595	540	478	425	402	263	765	552	506
VIT_14s0108g01030	1833	1641	3304	2797	2924	3329	2872	3216	2934	1779	2031	2425	1975	2177	1816	1920	1965	2453
VIT_14s0108g01040	1678	1236	3339	2121	2440	3258	2521	3080	3003	1601	1743	1881	1682	1538	1837	1820	1903	2244
VIT_14s0108g01050	234	226	479	359	358	537	365	440	518	248	291	217	209	281	168	267	323	346
VIT_14s0108g01060	429	235	724	388	519	617	620	668	681	357	304	310	276	235	222	399	351	417
VIT_14s0108g01070	1733	1280	2779	3085	2621	3111	3128	2887	2170	1649	2119	2735	2080	2220	1853	1478	1782	2111
VIT_14s0108g01080	15	9	4	10	51	9	30	10	8	17	20	7	12	27	2	23	17	5
VIT_14s0108g01090	18	18	26	35	47	23	40	44	26	17	20	21	20	27	12	29	20	21
VIT_14s0108g01100	194	187	305	358	242	240	320	227	182	158	173	170	193	187	151	155	176	143
VIT_14s0108g01110	4015	3471	6939	6647	6377	6781	7544	6333	6210	3874	4180	4445	4168	4280	3774	4000	4132	4628
VIT_14s0108g01120	625	560	1118	992	946	1031	1004	902	870	535	637	802	667	537	626	466	690	731
VIT_14s0108g01130	45	40	69	69	92	74	69	100	84	47	52	47	39	70	40	88	47	74
VIT_14s0108g01140	1640	1583	2549	2409	1905	2225	2535	1985	1878	1358	1514	1206	1305	1288	1126	1379	1346	1416
VIT_14s0108g01150	36	21	59	45	61	66	76	47	62	36	33	39	38	25	24	35	31	36
VIT_14s0108g01160	14122	13433	24097	21510	21858	24012	28864	21857	19428	14740	14739	20443	17822	12907	15214	13041	14189	13939
VIT_14s0108g01170	727	664	1127	990	1083	1170	1319	1080	991	677	826	772	767	714	631	699	778	753
VIT_14s0108g01180	86	68	142	140	142	115	139	117	74	75	80	98	88	71	76	79	86	98
VIT_14s0108g01190	69	83	74	81	91	91	113	101	89	49	59	47	45	65	38	50	57	65
VIT_14s0108g01200	606	653	1191	1286	748	1022	1269	1102	986	657	696	495	467	708	394	660	598	728
VIT_14s0108g01210	150	119	266	271	303	286	259	319	279	232	177	169	214	155	182	189	171	128
VIT_14s0108g01220	35	14	29	30	22	21	28	33	44	12	28	16	11	25	17	20	13	21
VIT_14s0108g01230	2626	2327	4496	4423	3639	4674	4485	4434	4322	2473	2725	2546	2572	2706	2273	2435	2532	3388
VIT_14s0108g01250	32	30	89	45	79	78	88	53	64	28	37	55	29	34	33	30	40	37
VIT_14s0108g01260	52	40	54	112	99	86	119	92	73	75	76	45	49	55	42	56	50	81
VIT_14s0108g01270	27	14	37	39	33	38	36	43	29	17	22	23	10	16	23	19	26	28
VIT_14s0108g01280	4110	3385	8401	5909	7300	7103	6423	8127	7211	4334	4698	5363	4527	4108	4224	4848	4907	6175
VIT_14s0108g01290	142	125	259	214	250	264	215	263	223	129	156	179	198	137	169	122	136	207
VIT_14s0108g01320	25	33	19	27	35	33	45	38	19	14	15	31	32	21	34	19	19	12
VIT_14s0108g01330	656	597	1352	953	953	950	1193	1080	1106	564	714	644	609	709	689	736	809	989
VIT_14s0108g01340	36	37	74	42	86	70	88	87	70	60	55	33	53	41	28	63	55	53
VIT_14s0108g01350	99	147	253	265	358	312	320	193	229	150	199	228	218	251	229	149	172	162
VIT_14s0108g01360	604	685	1251	1631	963	1254	1385	1130	1066	698	744	788	710	715	519	689	618	780
VIT_14s0108g01370	898	805	1614	1329	1190	1381	1541	1392	1288	831	864	898	846	974	701	829	874	1052
VIT_14s0108g01380	87	72	133	144	162	145	164	142	124	93	100	93	101	97	98	66	78	82
VIT_14s0108g01390	4172	2951	7189	5754	6858	7909	6977	8131	7621	3941	4880	3765	4138	5086	3594	4581	4603	5738
VIT_14s0108g01420	167	137	238	234	380	275	294	290	243	214	190	254	240	176	225	178	234	167
VIT_14s0108g01430	565	498	1062	1021	742	1095	1060	915	793	532	662	686	629	618	539	585	563	675
VIT_14s0108g01440	259	258	420	482	466	531	569	482	449	260	341	368	374	299	270	270	299	317
VIT_14s0108g01450	2343	1613	4033	2876	3192	3676	3619	4431	4095	2357	2397	1522	1607	2240	1373	2645	2255	3129
VIT_14s0108g01460	560	548	904	751	863	870	807	913	780	510	586	565	497	536	431	545	544	705
VIT_14s0108g01470	358	335	658	709	567	608	624	567	425	328	446	410	320	394	320	323	319	392
VIT_14s0108g01480	38	46	66	60	65	72	83	59	51	56	36	44	34	33	30	25	44	29
VIT_14s0108g01490	61	50	100	83	98	111	96	118	71	47	83	41	49	70	38	84	65	72
VIT_14s0108g01500	937	649	1408	1226	2875	1825	2374	1723	1578	983	1136	1042	1462	931	920	895	1129	1119
VIT_14s0108g01510	273	297	452	489	432	447	490	400	356	284	320	221	261	277	246	290	220	323
VIT_14s0108g01520	4993	3870	8641	6576	7350	8721	6982	9426	8297	5146	5143	4486	4531	4558	4009	5174	4866	6391
VIT_14s0108g01530	35	23	48	16	59	69	33	57	60	48	40	14	38	41	21	39	34	37
VIT_14s0108g01540	212	168	394	233	330	438	334	487	430	204	280	261	203	221	235	230	250	344
VIT_14s0108g01550	504	548	1092	877	890	1022	1057	869	825	549	707	835	678	706	614	550	605	649
VIT_14s0108g01560	356	263	552	339	636	646	653	639	615	312	377	365	446	484	367	368	419	470
VIT_14s0108g01570	247	241	447	458	386	431	441	447	366	255	323	269	244	226	173	281	264	302
VIT_14s0108g01580	176	147	295	191	224	249	256	276	260	178	198	151	138	173	110	149	160	210
VIT_14s0108g01590	3171	2420	5279	4839	4079	4665	5692	4804	3925	3312	3093	2913	3034	2753	2169	2798	2193	2991
VIT_14s0108g01600	1141	780	1624	1219	1565	1865	1608	1904	1503	1170	1120	946	1089	1017	784	1153	856	1239
VIT_14s0108g01610	996	602	1312	810	1350	1467	1229	1555	1360	910	925	672	919	841	704	915	700	1142
VIT_14s0108g01620	371	192	456	199	419	472	378	463	453	287	264	214	287	271	230	367	280	389
VIT_14s0108g01650	5572	5039	10486	9938	8455	10416	8795	10430	9038	5320	6296	5792	5578	6397	4720	5969	5860	6921
VIT_14s0108g01660	64	15	67	60	59	54	70	51	56	42	36	20	34	27	36	37	37	43
VIT_14s0108g01680	3812	2102	5395	3579	6251	7224	5926	7752	6960	3587	3897	3365	3551	4272	3407	4184	4519	6360
VIT_18s0122g00010	525	346	695	673	842	935	814	859	711	402	542	572	547	467	473	496	553	611
VIT_18s0122g00040	51	26	86	25	77	92	78	73	80	44	45	44	46	48	39	57	59	58
VIT_18s0122g00050	1349	1347	2312	1731	2386	2565	2801	2591	2383	1515	1585	1498	1442	1464	1326	1570	1605	1967
VIT_18s0122g00070	385	471	860	1054	671	750	1037	747	590	396	499	561	451	450	407	409	419	453
VIT_18s0122g00080	172	143	338	268	292	295	200	275	258	151	185	182	172	192	106	158	151	181
VIT_18s0122g00090	1655	1373	3244	2687	2564	3103	2579	3173	2758	1722	1805	1878	1959	1492	1621	1609	1719	2108
VIT_18s0122g00110	3292	2433	5701	3618	4957	6351	5290	6380	5892	3354	3753	3022	3108	3292	2612	3727	3812	5109
VIT_18s0122g00120	1713	949	2684	1561	3441	3819	2821	3817	3155	1918	2120	1258	2055	1773	1419	2308	1720	2580
VIT_18s0122g00140	675	540	1194	1131	1295	1402	1167	1254	972	721	902	1102	1065	786	871	716	741	859
VIT_18s0122g00160	3377	1691	5232	2969	5511	6590	4588	6435	6316	3025	3513	3125	3454	3256	3469	3803	4283	5287
VIT_18s0122g00180	998	538	637	707	641	460	1127	770	564	510	521	410	472	309	221	473	302	492
VIT_18s0122g00190	627	756	1051	1426	970	999	1212	928	799	556	737	751	799	602	747	610	569	635
VIT_18s0122g00220	894	625	1395	1243	1350	1362	1445	1436	1321	802	918	735	667	853	637	826	869	1042
VIT_18s0122g00230	946	840	1870	1263	1360	1623	1170	1882	1477	1154	1023	1083	1002	858	793	994	917	1180
VIT_18s0122g00240	128	97	274	188	200	235	204	221	200	119	168	132	134	163	83	155	186	182
VIT_18s0122g00260	1284	850	1946	1552	2449	2845	2148	2851	2524	1370	1734	1410	1468	1638	1422	1606	1790	2137
VIT_18s0122g00300	193	80	145	300	291	173	226	280	157	140	133	217	131	104	99	148	67	127
VIT_18s0122g00320	1195	824	1825	1485	1638	1833	2022	1459	1430	927	1213	1047	1177	1117	789	989	1140	1323
VIT_18s0122g00360	39	11	46	47	40	40	68	22	36	19	29	14	15	32	11	54	34	23
VIT_18s0122g00380	6516	3836	10668	5972	8137	10471	8592	11584	10750	5968	6556	4518	5269	5866	4259	6892	6822	9216
VIT_18s0122g00410	987	740	1820	1132	1408	1839	1601	1814	1754	963	889	919	1021	830	816	1071	996	1239
VIT_18s0122g00430	51	43	96	88	67	88	115	55	91	46	67	45	60	59	31	50	52	40
VIT_18s0122g00450	25	39	71	19	39	18	43	72	51	41	19	11	9	22	11	41	71	27
VIT_18s0122g00460	828	905	1335	1335	1370	1392	1797	1162	1158	807	878	1145	1167	677	906	659	807	770
VIT_18s0122g00470	169	178	258	353	371	353	465	304	261	206	192	365	277	167	218	160	194	159
VIT_18s0122g00480	652	538	910	830	912	866	1292	939	750	633	761	605	666	536	420	540	582	580
VIT_18s0122g00490	91	78	153	147	126	139	190	144	124	100	100	83	100	71	62	96	80	106
VIT_18s0122g00500	11181	11567	16070	19885	15442	17209	23299	16829	13903	12719	12450	13742	11788	11621	9496	10304	9958	11328
VIT_18s0122g00510	8325	6846	12353	11207	10199	12517	11497	10565	8270	7135	8314	9495	9300	7745	6667	6232	7314	8105
VIT_18s0122g00530	94	46	126	99	108	131	111	134	122	51	79	81	72	76	67	71	102	111
VIT_18s0122g00550	109	67	159	131	114	101	218	131	121	88	102	98	91	43	39	61	87	94
VIT_18s0122g00560	585	469	1003	969	914	1063	1014	976	931	586	656	599	601	576	612	576	703	827
VIT_18s0122g00590	111	123	184	139	195	134	202	169	171	93	82	98	156	79	103	114	145	86
VIT_18s0122g00600	659	906	1130	1126	770	853	1206	928	727	571	633	492	516	611	391	555	607	578
VIT_18s0122g00610	567	606	991	952	1483	1113	1610	1421	1030	796	766	700	922	509	536	894	673	661
VIT_18s0122g00630	212	316	349	521	548	334	464	297	285	267	258	624	432	198	433	232	228	184
VIT_18s0122g00660	2704	1920	4667	3548	4218	5375	3923	4639	4568	2492	2835	2680	3326	2228	2683	2654	2815	3304
VIT_18s0122g00670	465	296	605	541	639	583	854	611	497	475	446	450	421	409	315	390	409	524
VIT_18s0122g00680	22	22	44	52	46	43	54	35	30	29	33	39	39	27	18	23	21	18
VIT_18s0122g00700	353	228	563	488	536	608	693	540	503	330	385	254	404	363	268	397	394	393
VIT_18s0122g00710	266	198	389	348	415	434	603	367	319	261	279	272	316	222	256	275	269	252
VIT_18s0122g00770	229	266	358	402	324	320	472	397	296	227	242	271	197	190	218	206	235	225
VIT_18s0122g00780	81	67	144	144	205	114	176	185	136	104	131	77	107	90	77	164	104	90
VIT_18s0122g00810	391	627	545	652	510	466	702	502	414	285	339	425	377	363	267	350	352	302
VIT_18s0122g00830	157	123	266	194	294	305	339	340	270	183	218	156	191	209	138	200	207	181
VIT_18s0122g00840	61	44	119	94	122	130	107	165	153	64	75	45	65	91	49	113	112	142
VIT_18s0122g00850	2596	2860	4879	4000	4580	6115	4649	5330	5122	2820	3071	2921	3165	3081	2765	3108	2834	3112
VIT_18s0122g00860	149	137	267	305	241	255	307	226	199	153	196	140	163	161	143	186	170	227
VIT_18s0122g00870	1719	1308	3383	3547	2292	2621	3879	2562	2243	1677	2085	1714	1535	1727	1349	1663	1705	2611
VIT_18s0122g00880	261	207	409	477	369	422	490	403	317	219	299	251	205	301	216	199	273	349
VIT_18s0122g00890	2481	2378	4775	3864	3813	4625	4609	4507	4154	2568	2868	2404	2430	2855	2238	2854	2806	3475
VIT_18s0122g00900	34	46	87	66	51	66	104	46	47	35	45	57	58	37	45	33	33	35
VIT_18s0122g00920	206	135	339	284	291	307	349	287	316	207	213	131	124	179	129	200	173	202
VIT_18s0122g00950	587	717	1096	1279	891	976	1043	937	841	603	657	684	634	608	507	588	602	530
VIT_18s0122g00960	1328	1790	2506	2103	3629	2546	3147	2195	2029	1607	1849	2681	2784	1329	2265	1195	1822	1281
VIT_18s0122g00970	737	466	1379	1074	1001	1256	1209	1358	1413	707	830	543	658	593	553	737	862	1040
VIT_18s0122g00990	229	214	488	411	452	646	475	464	530	203	290	393	472	239	364	301	296	294
VIT_18s0122g01010	2210	1943	4244	3500	3182	4382	4167	3902	3903	2265	2330	2679	2531	2077	2190	2153	2430	2883
VIT_18s0122g01020	275	266	470	429	423	426	592	432	408	242	288	206	255	329	202	243	211	310
VIT_18s0122g01030	713	672	1506	1219	1301	1575	1338	1393	1470	809	917	744	780	961	704	944	912	1113
VIT_18s0122g01040	1189	1152	2091	1782	2109	2173	2216	2240	2126	1423	1384	1167	1228	1297	1037	1395	1291	1380
VIT_18s0122g01050	178	129	230	208	274	243	250	279	233	153	203	123	165	168	119	186	182	216
VIT_18s0122g01060	305	285	476	562	320	454	476	399	368	268	302	211	215	267	152	256	273	341
VIT_18s0122g01080	4541	2873	7851	5682	7249	8850	7518	8271	7904	4399	5190	4214	4974	4832	3864	4878	5104	6257
VIT_18s0122g01110	170	129	326	304	206	249	289	295	222	142	195	152	128	196	110	137	149	216
VIT_18s0122g01120	68	83	113	90	168	142	132	135	152	69	97	68	66	123	45	109	97	106
VIT_18s0122g01140	17	42	41	51	63	41	75	30	38	26	39	44	70	20	42	35	39	27
VIT_18s0122g01160	133	100	215	161	205	129	180	152	131	114	106	142	95	83	102	127	110	119
VIT_18s0122g01170	143	107	198	240	160	246	206	181	139	124	110	174	108	81	132	121	137	133
VIT_18s0122g01190	4804	5285	7317	7838	6027	6724	9244	6123	5708	4326	4822	5102	4858	4272	4407	4250	4570	5012
VIT_18s0122g01200	105	112	188	140	286	313	222	294	293	159	160	104	168	227	136	205	233	185
VIT_18s0122g01210	149	76	157	157	257	211	178	231	191	133	121	112	178	159	133	136	174	162
VIT_18s0122g01220	1659	1034	2808	2126	2417	2820	2435	2742	2518	1613	1784	1773	1837	1481	1502	1438	1564	2069
VIT_18s0122g01240	26	5	42	21	26	15	19	42	27	22	16	7	10	11	5	21	14	23
VIT_18s0122g01260	89	86	132	121	132	94	117	111	88	87	75	51	66	45	27	93	69	85
VIT_18s0122g01270	142	159	224	293	284	220	300	261	196	178	190	185	207	118	190	159	145	198
VIT_18s0122g01280	903	526	1108	617	1588	1341	1180	1247	1069	680	854	533	1026	827	661	723	886	967
VIT_18s0122g01290	1876	1154	2237	2355	3343	2964	3157	3389	2654	2636	2432	1639	1974	1305	1327	1985	1642	2405
VIT_18s0122g01320	9701	7502	16024	13674	13413	14455	13849	15020	13571	8308	9392	8351	8437	8575	5795	8235	8650	10075
VIT_18s0122g01340	1300	927	2052	1703	1651	2288	1995	1830	1846	1083	1176	1890	1479	886	1477	1002	1281	1463
VIT_18s0122g01350	155	136	246	314	186	207	246	227	177	128	168	174	133	153	142	113	155	141
VIT_18s0122g01370	1813	1187	3107	1977	2543	2908	2992	3149	2991	1655	1860	1351	1482	2005	1270	1987	1839	2291
VIT_18s0122g01380	229	164	427	315	417	435	353	413	422	275	292	175	240	324	195	332	297	305
VIT_18s0122g01400	249	217	420	380	511	390	469	463	424	252	247	170	257	226	159	316	244	284
VIT_18s0122g01410	1041	855	1932	1390	1268	1526	1320	1664	1499	923	969	782	786	1030	651	1062	869	1244
VIT_18s0122g01430	48	30	88	88	108	90	129	93	63	48	47	64	45	71	47	38	43	80
VIT_18s0122g01440	823	941	1620	1169	1277	1518	1464	1376	1259	719	788	978	941	809	812	736	772	917
VIT_18s0122g01470	16	14	19	19	42	29	29	6	14	16	17	48	46	22	14	14	24	10
VIT_18s0001g00050	634	679	1032	1078	772	903	1180	863	872	506	679	475	538	597	429	560	542	646
VIT_18s0001g00060	3050	2257	4862	3630	5417	5125	5650	5333	4756	2979	3659	2517	2598	3940	2602	3817	3823	4551
VIT_18s0001g00070	847	570	1420	1102	1424	1648	1316	1640	1524	741	1061	993	828	1025	840	979	1089	1384
VIT_18s0001g00090	319	307	675	502	547	477	655	488	444	339	364	341	358	369	313	346	331	405
VIT_18s0001g00100	2640	1897	3996	2975	4459	4512	3729	4565	4012	2689	2939	2787	2753	3224	2310	2760	2728	3386
VIT_18s0001g00110	259	190	399	305	380	425	352	360	366	196	285	282	255	253	223	249	267	344
VIT_18s0001g00120	1401	1274	2395	2131	1739	2106	2259	2128	1947	1268	1502	1246	1163	1485	984	1383	1295	1701
VIT_18s0001g00130	1293	1296	1995	2330	2631	1979	3059	1863	1470	1335	1396	2725	2123	814	1856	1233	1316	1097
VIT_18s0001g00140	58	65	66	85	53	45	87	54	72	34	28	82	66	32	26	31	45	35
VIT_18s0001g00170	152	175	308	249	244	315	403	296	246	157	143	210	229	147	162	171	193	173
VIT_18s0001g00180	4038	3402	6440	5748	6287	6936	6464	6797	6010	4101	4264	4864	4449	3946	3810	3811	3739	4694
VIT_18s0001g00190	4135	2848	6990	4736	8422	6506	6994	6887	5621	3991	4988	4818	4388	4499	4788	4138	5339	4939
VIT_18s0001g00210	16	19	47	39	46	28	37	21	44	20	21	76	38	15	33	23	12	14
VIT_18s0001g00220	68	94	111	91	137	106	147	86	62	61	60	125	66	57	68	51	46	68
VIT_18s0001g00230	672	823	1200	1255	963	1083	1364	965	1027	760	672	792	681	667	612	638	630	681
VIT_18s0001g00290	422	499	681	852	998	739	812	812	705	580	401	914	950	299	703	462	602	503
VIT_18s0001g00320	378	394	781	826	672	723	701	778	587	365	433	552	426	495	451	426	457	510
VIT_18s0001g00330	382	324	544	510	509	646	563	676	638	350	376	225	357	369	289	396	399	492
VIT_18s0001g00360	110568	132242	179883	153334	160473	184779	186407	171798	152489	116887	114545	131145	130505	114400	109779	109873	102442	123385
VIT_18s0001g00370	16	18	32	41	48	16	43	34	25	15	29	26	25	21	17	18	14	18
VIT_18s0001g00380	114	109	175	149	257	159	214	180	175	102	139	152	136	97	123	146	131	135
VIT_18s0001g00440	242	238	422	408	539	451	608	389	332	250	307	336	316	290	270	275	270	332
VIT_18s0001g00460	97	80	134	230	175	163	186	161	120	74	110	130	105	77	72	97	88	92
VIT_18s0001g00470	29	16	54	50	70	65	29	62	39	49	35	64	49	30	35	25	30	21
VIT_18s0001g00480	5697	4782	9113	6785	8167	9304	11656	9400	8381	5569	6417	4884	4989	6446	4538	6008	5670	6949
VIT_18s0001g00490	1509	1354	2721	2808	2680	2989	2781	2501	2456	1425	1671	2293	2006	1536	1971	1507	1609	1997
VIT_18s0001g00500	171	98	242	183	249	284	314	294	222	126	152	154	122	157	110	130	147	194
VIT_18s0001g00510	460	585	723	667	850	839	875	732	825	448	507	615	533	489	726	615	540	542
VIT_18s0001g00550	7	6	19	26	26	21	25	25	37	13	25	17	15	21	13	36	18	16
VIT_18s0001g00560	981	895	1643	1950	1357	1776	1777	1659	1471	917	988	1027	1003	1053	931	1003	1084	1063
VIT_18s0001g00570	63	40	96	76	97	122	92	135	111	57	77	35	38	63	39	65	62	93
VIT_18s0001g00580	368	330	748	552	628	711	634	715	650	408	482	379	367	450	284	462	421	505
VIT_18s0001g00600	25	39	43	48	71	56	76	53	36	42	43	30	34	22	22	36	26	34
VIT_18s0001g00610	206	178	213	212	182	198	248	113	142	141	180	200	230	103	129	93	126	134
VIT_18s0001g00640	42	33	81	35	76	90	93	81	91	26	65	37	21	48	35	65	60	45
VIT_18s0001g00650	8	17	13	19	19	11	14	11	23	6	23	7	5	15	14	11	12	18
VIT_18s0001g00660	34	18	72	52	58	42	74	82	62	31	42	42	18	36	26	64	38	76
VIT_18s0001g00670	168	165	209	276	252	207	247	204	142	156	163	107	130	139	77	131	118	117
VIT_18s0001g00690	378	558	724	947	893	861	1207	771	712	539	454	583	473	540	463	444	394	363
VIT_18s0001g00700	67	24	69	69	154	120	154	124	79	64	62	40	77	74	34	60	23	74
VIT_18s0001g00740	162	23	343	102	70	104	87	261	191	91	95	59	81	61	39	122	154	371
VIT_18s0001g00750	2337	1981	3296	3426	2520	3146	4122	2988	2705	2128	2171	2045	1930	2004	1493	1828	1932	2425
VIT_18s0001g00760	280	311	530	515	625	557	601	474	453	300	345	584	467	251	484	241	275	252
VIT_18s0001g00770	290	156	443	298	475	523	396	585	450	348	253	271	331	164	259	269	243	318
VIT_18s0001g00800	11	11	25	19	32	15	29	27	27	11	5	15	9	13	4	20	27	15
VIT_18s0001g00810	1300	1790	2607	3143	1890	2577	2296	2179	1760	1388	1170	2480	2002	1115	1751	1225	1185	1094
VIT_18s0001g00820	30	19	34	30	53	49	54	32	36	19	42	30	36	21	24	43	28	12
VIT_18s0001g00840	1210	1166	2129	1291	1352	817	2837	1622	1847	862	1083	601	625	557	441	1228	1255	1412
VIT_18s0001g00860	12259	6780	22166	11722	22042	21972	12364	24658	22309	10493	14182	11947	12186	14863	10945	14563	15570	19603
VIT_18s0001g00870	73	94	91	142	112	99	167	101	107	68	84	95	80	67	83	72	57	49
VIT_18s0001g00890	194	171	351	295	254	289	304	355	320	183	213	140	119	205	113	222	215	256
VIT_18s0001g00900	331	394	580	695	471	545	692	480	432	374	377	480	345	387	233	343	320	356
VIT_18s0001g00910	195	144	262	196	337	371	220	382	390	211	222	142	208	215	213	194	257	269
VIT_18s0001g00950	1707	1018	2115	1654	1581	1739	2139	1847	1515	1212	1510	894	1179	1087	743	1111	1304	1790
VIT_18s0001g00960	178	156	314	342	271	356	284	337	347	176	187	193	169	205	187	252	238	243
VIT_18s0001g00980	47	16	59	67	50	43	64	61	66	34	49	32	40	39	32	20	45	42
VIT_18s0001g00990	715	684	1060	1035	900	1469	1328	1089	1143	680	694	582	684	706	541	588	585	651
VIT_18s0001g01020	3390	2689	6866	4567	4407	6172	5108	6197	5580	2954	3682	2398	2793	3769	2276	3517	3345	4157
VIT_18s0001g01030	1787	2143	2921	3446	2573	2748	3734	2875	2660	1860	1861	1574	1870	1850	1239	1982	1631	1641
VIT_18s0001g01060	3123	2785	4924	4836	3755	3928	4684	4570	3170	2630	3714	2004	2290	2787	1313	2640	2409	3081
VIT_18s0001g01070	40	53	97	39	100	118	133	101	110	49	76	50	49	73	51	84	92	69
VIT_18s0001g01080	536	894	995	1353	916	966	1057	756	725	556	606	789	738	501	559	473	467	400
VIT_18s0001g01090	4261	3736	6479	4732	5480	6274	6416	6032	5675	3764	4288	4096	3574	4066	3249	4104	4215	4778
VIT_18s0001g01110	501	525	1002	823	911	810	1052	809	757	513	517	847	610	569	726	619	649	613
VIT_18s0001g01120	2355	2164	3749	3370	3608	3896	3619	3418	3120	2317	2580	2532	2479	2245	2003	2070	2167	2427
VIT_18s0001g01130	5947	15162	14567	13624	15022	15295	11142	11714	10900	6902	8161	11565	14224	7372	10017	7756	8457	5422
VIT_18s0001g01140	13	46	54	105	105	104	82	58	47	45	28	123	123	22	75	36	50	21
VIT_18s0001g01180	5590	4778	10668	7782	9341	10707	9381	10950	10197	5776	6909	5912	6034	6206	5028	6593	6181	7753
VIT_18s0001g01270	7498	5483	13573	8545	11496	13331	10566	14226	12568	7245	8049	5679	6235	8539	5546	8098	7790	10565
VIT_18s0001g01350	8	7	18	30	22	27	26	29	17	11	15	19	18	6	12	10	25	12
VIT_18s0001g01360	28	19	41	14	54	43	27	36	36	27	30	21	20	19	15	28	29	49
VIT_18s0001g01460	15	19	36	38	22	18	24	31	25	23	17	14	10	15	7	21	10	10
VIT_18s0001g01470	14	17	16	32	19	16	27	6	4	15	23	34	15	5	11	6	2	4
VIT_18s0001g01510	18	21	43	61	41	28	64	43	35	23	30	26	20	20	28	28	18	28
VIT_18s0001g01530	158	114	348	309	309	281	189	318	274	141	225	271	184	181	154	212	177	216
VIT_18s0001g01560	429	477	926	915	915	971	1034	1023	890	561	622	590	544	627	531	540	612	683
VIT_18s0001g01580	441	407	846	560	855	972	1052	994	874	533	526	564	585	573	527	512	670	735
VIT_18s0001g01590	192	171	236	265	189	241	305	227	205	155	178	140	139	155	100	143	124	122
VIT_18s0001g01600	552	363	888	452	851	942	861	940	945	472	544	423	424	457	424	632	508	728
VIT_18s0001g01640	9866	8163	17708	12304	14476	17324	14262	16811	14640	8642	9861	9929	9963	9982	9375	9948	10508	13185
VIT_18s0001g01650	49	43	128	103	129	119	140	121	94	51	65	36	65	76	62	97	71	75
VIT_18s0001g01660	39	29	99	100	82	70	100	98	73	54	73	68	60	42	39	50	38	65
VIT_18s0001g01670	5685	3041	8479	5572	10718	11486	8026	11833	10971	5246	6172	6100	6409	6011	6670	6675	7200	9717
VIT_18s0001g01680	7	19	31	27	39	20	28	24	25	17	12	25	47	17	41	14	34	11
VIT_18s0001g01690	172	178	280	347	244	259	348	195	211	168	179	232	197	141	206	141	157	165
VIT_18s0001g01700	2348	1152	4348	2654	3219	3787	2969	4301	3805	2242	2392	1972	1896	1863	1674	2184	2389	3267
VIT_18s0001g01740	1156	332	1034	197	1955	2189	985	2502	2281	830	1062	472	951	923	852	1436	1548	2025
VIT_18s0001g01770	235	355	381	486	511	451	543	413	368	205	280	298	272	279	240	236	230	265
VIT_18s0001g01780	1448	1235	2521	1919	2168	2438	2522	2627	2624	1521	1675	1233	1475	1280	1200	1538	1752	1936
VIT_18s0001g01810	349	238	595	404	562	612	649	653	646	344	433	339	350	474	364	385	444	555
VIT_18s0001g01830	2449	1677	3847	2774	3583	4426	3812	3644	3673	2152	2383	2758	2736	1962	2233	2290	2438	3182
VIT_18s0001g01850	80	67	169	163	118	160	159	133	103	84	65	77	94	67	63	54	91	86
VIT_18s0001g01860	368	242	495	330	750	754	685	744	729	378	418	386	456	388	473	394	500	548
VIT_18s0001g01930	398	294	725	440	583	778	783	739	744	426	459	254	319	464	277	453	510	612
VIT_18s0001g01950	117	84	188	151	179	228	226	198	162	112	92	104	121	76	64	116	113	133
VIT_18s0001g01960	625	300	1434	695	540	394	1175	1175	1641	492	450	273	254	318	178	646	852	1008
VIT_18s0001g01980	586	446	1143	840	851	919	1014	1015	1025	584	648	463	495	584	376	647	547	751
VIT_18s0001g02020	7914	6740	17818	15121	12861	15124	14437	15345	15353	8549	8302	11953	10704	5773	9490	8658	8719	9595
VIT_18s0001g02030	533	268	702	737	900	712	830	988	847	573	510	445	414	447	346	607	390	613
VIT_18s0001g02050	1477	1557	2938	2879	3287	3570	3113	2779	2819	1850	2090	2676	2569	1918	1928	1572	1986	1847
VIT_18s0001g02090	338	326	631	516	455	532	636	529	509	345	353	242	245	375	223	381	346	462
VIT_18s0001g02100	300	308	695	806	509	620	914	640	591	284	391	408	319	377	304	293	323	398
VIT_18s0001g02120	0	7	26	9	1	0	4	2	9	0	0	2	33	6	11	0	2	0
VIT_18s0001g02160	1420	1277	2830	2426	2163	3042	2452	2775	2474	1427	1657	1624	1512	1643	1319	1608	1528	1972
VIT_18s0001g02190	848	507	1148	632	1349	1515	973	1514	1528	758	926	642	849	868	718	996	1025	1224
VIT_18s0001g02200	247	169	409	345	355	377	408	423	330	218	287	249	250	256	208	302	261	264
VIT_18s0001g02220	203	106	311	340	237	486	248	344	278	232	194	259	274	120	240	142	165	254
VIT_18s0001g02230	23	7	35	11	7	21	25	25	29	10	11	2	12	17	2	8	8	35
VIT_18s0001g02260	3463	3784	5828	6325	4462	5580	6384	4995	4638	3159	3749	3181	3013	3716	2626	3239	3176	3603
VIT_18s0001g02270	71	19	81	92	67	86	104	60	104	63	56	29	29	50	38	47	37	70
VIT_18s0001g02280	22	2	50	41	45	34	50	28	32	23	43	24	20	23	13	31	21	34
VIT_18s0001g02300	6048	4049	6622	9366	7721	7509	9963	8293	5954	5719	5285	6322	6057	4039	4253	4867	4375	5550
VIT_18s0001g02340	1366	627	1933	1054	2061	2208	1800	2867	2573	1204	1397	705	855	1297	677	1718	1346	2158
VIT_18s0001g02370	832	763	1265	1119	1194	1254	1509	1259	1131	702	927	746	816	846	671	798	879	844
VIT_18s0001g02380	392	221	648	579	622	609	655	778	609	427	389	318	353	348	270	427	368	499
VIT_18s0001g02420	780	434	1178	909	754	882	713	1352	1084	725	603	347	351	569	286	780	479	1004
VIT_18s0001g02440	896	840	1470	1466	1348	1476	1687	1430	1363	857	984	857	881	897	749	859	905	927
VIT_18s0001g02470	3785	4587	7331	6848	6813	6729	7560	6819	6168	4323	4899	4567	4194	4934	3421	4046	4085	4127
VIT_18s0001g02480	595	250	817	416	723	626	653	1173	896	531	558	228	320	448	264	636	484	878
VIT_18s0001g02510	6969	7340	12361	9872	10665	11696	12833	12013	10322	7467	7220	6689	6750	7258	5441	6799	6944	7350
VIT_18s0001g02540	22	6	24	32	7	12	15	12	8	14	8	10	8	8	5	21	8	13
VIT_18s0001g02550	249	234	398	324	344	351	433	317	279	208	246	281	301	208	210	211	227	216
VIT_18s0001g02570	1217	649	1880	1286	1605	1347	1619	1979	1702	941	884	791	916	737	570	1223	868	1352
VIT_18s0001g02610	90	121	195	260	186	146	201	212	167	113	104	105	140	99	62	108	84	113
VIT_18s0001g02630	1669	1397	2675	2219	2113	2732	2540	2510	2172	1539	1739	1405	1503	1603	1211	1473	1648	1955
VIT_18s0001g02640	325	399	488	562	425	436	558	400	338	303	299	348	322	276	246	254	301	294
VIT_18s0001g02650	3524	4240	6165	6521	4808	5608	6995	5388	4992	3527	3667	3668	3497	3358	2875	3414	3233	3527
VIT_18s0001g02680	1755	1652	2660	2833	2554	2996	3222	2401	2127	1731	1876	1876	2015	1636	1484	1557	1651	1719
VIT_18s0001g02690	293	203	272	383	464	257	515	264	168	155	278	209	293	166	93	153	160	152
VIT_18s0001g02700	447	467	719	727	924	946	619	658	759	455	487	671	819	411	579	445	490	505
VIT_18s0001g02710	123	112	232	215	169	217	248	207	218	131	118	124	125	123	92	124	107	127
VIT_18s0001g02730	183	127	329	345	207	455	329	298	303	216	202	219	316	114	215	186	177	183
VIT_18s0001g02740	485	399	565	585	932	563	714	580	487	386	439	469	480	327	501	347	470	278
VIT_18s0001g02750	238	264	363	536	386	340	423	322	296	262	250	389	344	220	217	191	197	245
VIT_18s0001g02760	105	154	215	77	119	69	80	77	132	53	60	51	72	54	82	130	104	68
VIT_18s0001g02770	115	279	356	164	170	143	138	168	177	101	73	112	111	88	116	189	165	116
VIT_18s0001g02790	36	57	55	90	51	76	88	41	69	48	61	55	55	46	49	33	44	23
VIT_18s0001g02810	805	605	1488	1014	1499	1451	1624	1510	1456	872	876	828	901	798	899	1038	962	1081
VIT_18s0001g02820	38	15	57	28	58	43	55	62	47	38	56	19	33	31	16	40	36	63
VIT_18s0001g02830	530	402	1006	862	854	1005	1115	982	988	557	726	525	534	701	532	636	642	794
VIT_18s0001g02860	97	42	119	78	163	179	121	185	177	91	118	70	93	122	91	103	113	146
VIT_18s0001g02950	31	60	78	79	62	86	100	87	52	47	51	39	48	51	34	58	24	30
VIT_18s0001g02970	2341	2153	4073	3871	3363	3581	3666	3954	3535	2246	2172	2825	2412	1812	2248	2222	2006	2574
VIT_18s0001g03020	69	54	118	113	119	108	142	116	129	59	74	91	54	55	71	75	74	87
VIT_18s0001g03060	23	1	29	6	41	49	15	46	45	19	39	21	25	23	23	29	25	33
VIT_18s0001g03080	67	43	132	146	93	100	116	121	92	59	59	46	78	66	52	72	53	70
VIT_18s0001g03100	871	666	1585	1275	1662	1859	1402	1802	1687	887	1039	941	936	973	793	998	1072	1360
VIT_18s0001g03110	681	543	1110	1013	944	1033	1018	1198	1088	528	714	677	496	665	570	674	697	875
VIT_18s0001g03130	533	365	867	587	765	723	1131	694	838	519	574	334	440	467	335	522	463	634
VIT_18s0001g03150	24	33	48	65	29	48	66	40	46	41	24	29	44	37	25	49	44	38
VIT_18s0001g03190	22	26	19	35	30	33	34	16	32	10	11	13	17	20	12	10	22	13
VIT_18s0001g03200	477	807	1002	1152	790	866	997	874	866	536	499	606	504	541	502	515	507	522
VIT_18s0001g03220	5449	7588	10063	12201	8052	9389	12620	8539	7843	6339	6269	7846	6258	5972	5173	5390	5700	5534
VIT_18s0001g03230	849	699	1558	1301	1536	1509	1418	1662	1445	852	1080	873	929	861	816	898	991	1065
VIT_18s0001g03240	63	92	169	174	138	190	105	152	121	122	118	145	152	111	119	132	76	95
VIT_18s0001g03250	464	385	702	639	718	819	754	858	683	428	595	393	478	435	342	470	392	574
VIT_18s0001g03270	38	34	77	44	68	43	54	64	38	13	43	32	25	40	31	52	40	35
VIT_18s0001g03290	769	1506	1791	1833	1864	2174	2083	1682	1654	1228	1386	1564	1344	1576	1243	1070	1240	934
VIT_18s0001g03300	389	343	702	619	690	620	808	612	577	418	479	327	364	416	299	402	405	434
VIT_18s0001g03330	527	546	951	939	779	816	987	804	671	446	515	575	460	587	484	518	455	518
VIT_18s0001g03370	5680	3581	9140	5581	11518	11317	9925	12051	10276	6210	6948	5234	5880	6590	5643	6814	6786	8182
VIT_18s0001g03390	179	162	330	192	273	311	326	315	369	176	206	148	224	140	183	180	266	245
VIT_18s0001g03430	4125	3108	9385	6402	4594	6190	4699	7385	6371	3293	3623	2542	2339	4875	1806	4623	3494	6818
VIT_18s0001g03450	2979	4141	4868	5756	4231	4523	6561	4413	3942	2940	3454	3394	3088	3102	2475	2766	2618	2987
VIT_18s0001g03470	242	107	264	256	616	292	266	300	251	201	180	261	217	159	372	173	261	153
VIT_18s0001g03520	1566	1380	2533	2298	2606	2638	2528	2849	2562	1629	1549	1777	1611	1443	1630	1494	1621	1928
VIT_18s0001g03580	9092	9823	15254	18914	9949	13464	16214	12094	10575	8641	9722	10377	8102	8599	6525	7092	7183	8109
VIT_18s0001g03680	228	129	389	365	432	454	349	418	391	202	232	281	262	236	241	258	278	335
VIT_18s0001g03730	273	177	394	286	527	515	328	599	439	307	295	280	278	265	283	299	329	327
VIT_18s0001g03760	2197	1820	3617	3703	2745	4083	3688	3756	3148	1942	2331	2070	1714	2798	1559	2124	2058	2811
VIT_18s0001g03790	3314	2493	5695	4198	4764	5286	5465	6708	5655	3225	3319	2635	2550	3404	2343	3845	3523	4450
VIT_18s0001g03820	1963	1543	3221	2108	3046	3771	3555	3605	3596	2001	2198	1759	1907	2176	1713	2203	2487	2532
VIT_18s0001g03850	144	193	281	377	237	242	391	202	189	132	197	214	224	141	143	123	154	133
VIT_18s0001g03910	310	289	657	559	889	592	778	741	686	543	480	923	719	399	793	527	551	517
VIT_18s0001g03950	1547	1126	2831	1982	2184	2413	2578	2600	2179	1423	1735	1178	1347	1510	1035	1504	1677	2109
VIT_18s0001g03960	2209	1758	3625	2345	3325	4093	3145	4599	4197	2354	2383	1690	1750	2357	1581	2643	2383	3021
VIT_18s0001g03990	2015	1455	4006	3113	3230	3653	4221	3954	3550	2278	2498	1905	1848	1997	1625	2304	2177	2728
VIT_18s0001g04010	2063	2450	3633	4354	3093	3624	4552	3401	2977	2363	2287	2705	2163	2127	1731	2021	2039	2361
VIT_18s0001g04040	3548	2093	5626	3900	6264	6582	5819	7105	6155	3427	4004	3956	3898	3542	3861	4105	4368	5152
VIT_18s0001g04100	1743	1638	3143	2811	2698	2941	3632	2932	2679	1719	2003	1546	1525	1767	1404	1813	1958	2153
VIT_18s0001g04140	448	218	503	573	561	592	602	623	409	392	427	286	355	409	220	372	335	542
VIT_18s0001g04150	3023	2105	4585	3071	2996	4007	3786	4561	4140	2615	2774	1475	1812	2312	1154	2864	2105	3520
VIT_18s0001g04160	8032	6230	14188	10239	11416	13740	14834	14982	13296	8056	8367	7395	8043	7804	6488	8635	7779	10533
VIT_18s0001g04180	112	116	205	173	219	201	266	222	208	135	130	139	155	144	122	146	114	168
VIT_18s0001g04190	157	149	276	286	216	279	273	235	242	125	206	145	155	175	126	154	164	160
VIT_18s0001g04270	117	60	201	120	170	237	184	213	183	118	137	91	76	98	73	122	114	160
VIT_18s0001g04290	186	128	316	326	230	278	311	281	236	134	154	215	186	133	166	129	147	185
VIT_18s0001g04340	7975	5638	14257	10429	11034	14545	9349	14054	12543	7021	8112	8487	7103	7806	7019	7770	8035	10876
VIT_18s0001g04380	73	44	69	67	89	109	91	89	77	99	96	48	58	74	44	47	61	65
VIT_18s0001g04420	380	301	640	630	499	554	567	583	569	343	475	368	299	478	289	400	378	454
VIT_18s0001g04440	683	381	930	814	928	1028	1077	1019	893	598	610	520	599	562	494	571	661	822
VIT_18s0001g04470	227	238	415	546	538	604	548	428	472	309	346	453	409	290	434	247	278	301
VIT_18s0001g04520	91	141	164	233	283	236	347	183	156	148	151	226	233	116	201	164	138	84
VIT_18s0001g04540	4987	3546	7945	7321	6688	8421	8263	8337	7493	4740	5579	4892	4261	5410	3743	4908	5126	7175
VIT_18s0001g04580	332	266	443	348	472	432	518	419	396	240	373	306	322	261	281	229	282	267
VIT_18s0001g04590	30	10	47	21	41	52	42	54	39	34	29	35	47	20	30	28	42	32
VIT_18s0001g04600	976	849	1549	1304	1236	1439	1552	1523	1468	1049	961	753	795	734	644	962	873	1109
VIT_18s0001g04610	261	165	433	356	385	379	349	354	374	235	238	217	232	212	212	211	240	270
VIT_18s0001g04630	38	28	63	63	55	36	68	45	71	33	44	30	50	26	38	40	31	29
VIT_18s0001g04640	226	189	370	400	240	162	404	287	350	162	185	207	171	84	137	197	189	140
VIT_18s0001g04660	278	158	201	708	430	317	539	298	203	255	249	624	280	150	235	196	140	151
VIT_18s0001g04680	184	94	250	219	389	306	293	331	301	209	203	186	150	185	161	270	231	280
VIT_18s0001g04700	267	274	548	544	494	540	451	470	453	311	319	273	299	314	271	260	335	334
VIT_18s0001g04730	1779	1226	3187	2318	2428	3066	2482	3204	2993	1729	1728	1426	1590	1537	1398	1762	1791	2062
VIT_18s0001g04760	56	40	73	89	63	84	56	83	64	47	65	57	84	56	47	40	38	50
VIT_18s0001g04770	2120	1892	4409	3147	3839	4178	3812	3869	3860	2323	2461	3241	2872	2355	2859	2384	2635	3009
VIT_18s0001g04800	52	101	132	138	92	125	159	111	95	61	52	52	96	47	47	83	54	64
VIT_18s0001g04860	686	571	1056	922	954	864	1067	983	984	607	742	733	728	760	665	616	846	901
VIT_18s0001g04880	334	371	523	481	484	444	604	458	438	269	326	239	266	291	227	298	369	279
VIT_18s0001g04910	61	66	143	89	173	49	155	119	137	92	66	147	76	63	108	92	83	74
VIT_18s0001g04970	148	89	234	198	230	236	211	200	216	118	146	128	115	105	125	147	138	186
VIT_18s0001g04980	4116	2569	7970	2998	8725	6048	6570	8909	9168	3361	4269	4888	4818	3327	6512	6049	7643	7324
VIT_18s0001g05020	46	54	79	127	178	84	130	129	69	72	91	73	82	76	79	83	67	41
VIT_18s0001g05030	73	63	136	108	163	71	179	106	92	95	122	87	75	70	73	64	122	70
VIT_18s0001g05040	66	132	139	232	158	149	142	129	103	74	98	71	83	72	90	87	67	80
VIT_18s0001g05060	468	357	1168	596	616	516	789	861	867	365	468	352	343	326	455	500	620	685
VIT_18s0001g05080	1809	1308	3125	2786	2804	3178	2822	3069	2564	1660	1860	1932	1855	1595	1547	1773	1769	2183
VIT_18s0001g05100	176	69	318	207	339	376	298	412	414	178	209	209	184	191	216	239	263	373
VIT_18s0001g05110	9406	5804	16214	10461	15509	19139	13168	18770	18379	8992	10088	9397	10321	8970	8963	10263	11532	14561
VIT_18s0001g05130	1023	841	1692	1455	1439	1622	1610	1628	1515	863	1019	969	925	973	900	973	1004	1182
VIT_18s0001g05160	77	52	168	240	158	140	116	164	126	80	74	270	105	93	149	73	80	113
VIT_18s0001g05220	5072	3723	7298	6292	7356	8010	8728	8638	7246	4960	5038	5254	4748	4490	4235	4956	4895	6066
VIT_18s0001g05250	1150	807	1567	1994	1939	1892	2153	2239	1654	1457	1210	1031	1250	1066	707	1298	978	1239
VIT_18s0001g05270	491	388	792	650	754	822	755	853	748	447	507	349	508	532	406	545	453	599
VIT_18s0001g05300	62	36	70	69	78	61	99	95	46	61	78	27	19	78	6	71	27	43
VIT_18s0001g05310	874	656	1432	764	881	830	1272	1230	1150	686	819	478	502	495	409	822	934	951
VIT_18s0001g05330	43	50	110	115	80	121	116	95	78	80	65	46	60	73	30	53	58	58
VIT_18s0001g05340	171	141	261	202	288	297	269	331	279	165	190	116	134	204	127	159	154	201
VIT_18s0001g05370	33	42	63	78	50	80	55	61	44	38	50	26	41	67	27	42	23	37
VIT_18s0001g05380	17	14	35	31	25	17	30	73	42	25	18	12	5	33	13	27	10	24
VIT_18s0001g05400	549	498	1131	957	1109	1032	801	1113	851	629	750	676	773	545	532	668	563	578
VIT_18s0001g05420	565	553	976	934	944	1073	904	908	853	657	650	801	781	435	623	534	626	661
VIT_18s0001g05440	37	41	47	86	62	83	76	60	36	53	51	60	49	31	51	22	48	46
VIT_18s0001g05480	86	125	167	184	272	152	277	136	133	107	136	201	251	109	196	97	118	90
VIT_18s0001g05530	555	928	1036	773	610	819	664	720	740	380	314	862	524	460	513	447	478	431
VIT_18s0001g05550	4511	4021	7500	6316	6818	7650	8314	7329	6360	4210	4859	5490	5253	4392	4485	4178	4449	4936
VIT_18s0001g05570	349	929	854	1057	1170	979	975	845	599	644	581	1168	1047	593	876	401	485	474
VIT_18s0001g05580	109	180	192	404	666	283	428	242	153	210	256	497	342	251	466	162	216	118
VIT_18s0001g05590	222	163	329	335	417	331	422	400	362	218	273	227	217	360	149	244	246	270
VIT_18s0001g05600	163	63	181	126	204	209	166	196	199	103	133	107	108	85	92	128	127	156
VIT_18s0001g05620	755	553	1401	918	1070	1342	1252	1346	1197	694	826	630	620	707	497	779	760	1017
VIT_18s0001g05640	681	434	1018	710	924	970	869	1147	1013	548	644	442	483	573	432	645	686	857
VIT_18s0001g05680	1569	1338	2809	2767	3264	3486	3432	2753	2731	1891	2052	2717	2515	1668	2353	1568	2219	2035
VIT_18s0001g05690	980	1290	1683	1989	1610	1834	2136	1608	1687	1098	1007	1056	1104	957	914	1008	994	1047
VIT_18s0001g05710	143	93	264	289	305	224	384	273	207	138	166	194	155	127	130	157	132	143
VIT_18s0001g05720	5804	6039	9200	9138	7077	8665	10955	8305	7695	5159	5911	5161	5284	5413	4284	5123	5227	5721
VIT_18s0001g05730	1865	1880	3638	3521	2718	3353	3637	3431	3092	2125	2142	2068	1862	1903	1572	2007	1829	2065
VIT_18s0001g05740	1747	1191	2916	1952	2917	3002	3113	3239	2707	1596	1946	1400	1650	1701	1334	1787	1966	2559
VIT_18s0001g05780	6985	4006	9045	8206	7746	9972	7939	9905	9725	6019	6404	3945	5138	5421	3079	5540	5006	7023
VIT_18s0001g05790	1112	903	1569	1187	1318	1468	1559	1569	1456	954	1098	741	777	1113	523	1020	970	1119
VIT_18s0001g05800	5301	4114	8460	7462	8760	10011	9266	9804	8397	5517	6355	4365	5054	5828	4237	5670	5382	6671
VIT_18s0001g05840	202	127	326	365	207	285	219	347	284	263	170	289	208	58	203	161	110	226
VIT_18s0001g05990	83	112	153	190	119	126	151	120	143	90	77	134	137	64	135	79	90	80
VIT_18s0001g06020	91	32	104	151	116	75	89	214	128	109	56	40	38	50	28	105	42	74
VIT_18s0001g06030	398	185	385	391	398	320	539	726	704	360	283	219	210	146	133	420	237	329
VIT_18s0001g06040	118	61	172	81	188	193	94	200	169	67	118	84	104	121	62	150	114	127
VIT_18s0001g06050	76	55	133	83	143	120	89	135	137	67	71	74	64	84	47	97	68	89
VIT_18s0001g06060	2337	2695	3858	4290	2603	3862	3664	3266	3260	2222	2028	3447	3145	1582	2111	1809	1932	1965
VIT_18s0001g06080	140	83	206	137	101	129	193	192	154	86	110	89	87	61	51	116	88	212
VIT_18s0001g06090	111	68	133	90	193	46	79	263	202	56	67	37	21	33	35	155	115	116
VIT_18s0001g06120	315	470	997	396	691	279	800	986	916	289	289	256	254	183	170	528	633	414
VIT_18s0001g06150	11058	6634	18099	18718	7848	12310	11249	19706	15048	11056	9554	4646	5123	6927	2778	10917	7308	11235
VIT_18s0001g06170	1138	554	1215	1868	936	884	1178	2072	1361	1246	800	524	473	597	197	1128	444	947
VIT_18s0001g06180	915	553	1094	1208	998	831	1291	1623	1404	969	654	601	601	400	344	980	531	715
VIT_18s0001g06200	1358	1056	2885	2403	2048	2442	2168	2755	2294	1287	1619	1369	1245	1625	1155	1619	1460	1866
VIT_18s0001g06220	23	26	51	76	32	41	44	39	39	27	25	58	18	19	29	20	26	23
VIT_18s0001g06250	2793	3336	7500	4071	5973	5101	5644	6262	6032	2948	3347	5890	3761	3121	5088	3777	4864	4375
VIT_18s0001g06270	3604	2229	5158	4102	5224	5005	5594	6525	5358	3308	3489	2780	2800	3154	2404	3763	3057	4536
VIT_18s0001g06290	2215	2542	3851	3719	2981	3316	4153	3281	2997	2231	2338	2394	1995	2429	1895	2211	2088	2446
VIT_18s0001g06310	622	570	1094	907	979	985	1153	878	880	589	630	702	700	393	597	576	579	717
VIT_18s0001g06320	21	9	8	11	13	6	16	16	3	18	18	5	11	2	12	18	7	8
VIT_18s0001g06330	3526	3796	6260	6597	5197	5533	6656	5381	5093	3137	3546	4336	4426	3377	3472	3137	3572	3756
VIT_18s0001g06350	235	164	288	314	415	303	336	366	319	220	298	206	200	268	131	215	216	264
VIT_18s0001g06370	40	32	42	46	51	38	67	34	43	29	30	23	32	25	23	20	25	49
VIT_18s0001g06390	2549	2738	3951	3161	4006	4839	4951	4449	4385	2831	2579	2400	2756	2210	1988	2737	2581	2658
VIT_18s0001g06400	189	188	341	406	255	198	457	343	398	216	197	267	176	119	108	229	195	170
VIT_18s0001g06410	68	106	92	131	114	89	134	99	72	62	91	79	60	68	77	61	59	71
VIT_18s0001g06460	80	43	154	75	133	146	96	192	113	99	67	55	65	90	76	88	94	118
VIT_18s0001g06500	751	436	1264	649	1180	1397	1119	1449	1391	696	804	601	739	789	741	937	902	1162
VIT_18s0001g06520	561	530	1125	899	1283	1399	1131	1314	1244	781	844	695	826	889	752	802	817	894
VIT_18s0001g06560	28342	16619	53151	51396	32456	35438	41326	47604	36211	21133	28323	23704	21710	19535	15821	26903	20000	29377
VIT_18s0001g06580	43	16	59	64	37	54	58	56	61	26	36	49	23	13	39	38	32	50
VIT_18s0001g06590	41	49	47	65	113	71	87	64	58	31	60	60	57	36	57	32	41	33
VIT_18s0001g06600	129	128	198	265	200	213	230	234	195	132	143	155	166	124	143	121	92	178
VIT_18s0001g06610	1140	1077	1734	1886	1305	1289	2334	1867	1644	1078	949	978	967	782	735	1339	896	1231
VIT_18s0001g06670	98	114	157	129	185	145	233	184	123	112	115	71	82	94	77	104	93	106
VIT_18s0001g06760	274	173	341	404	444	248	507	503	384	322	240	267	262	117	183	274	194	214
VIT_18s0001g06790	93	26	131	33	137	51	170	113	138	88	51	51	90	48	82	82	69	94
VIT_18s0001g06840	16	117	45	128	232	72	107	102	55	70	53	166	102	52	149	45	64	18
VIT_18s0001g06910	45	52	93	75	73	70	92	81	57	48	42	132	115	50	65	47	64	33
VIT_18s0001g06940	42	70	90	117	74	74	103	67	48	56	71	114	114	34	75	41	42	47
VIT_18s0001g06950	329	466	641	574	498	539	561	456	415	334	280	808	626	227	559	247	380	324
VIT_18s0001g06970	511	219	621	412	683	830	475	980	776	352	420	275	309	390	375	545	533	724
VIT_18s0001g07000	311	228	405	410	421	411	503	430	359	241	308	291	292	229	195	244	274	332
VIT_18s0001g07010	16	13	41	44	39	35	38	26	17	22	17	28	26	24	26	21	19	22
VIT_18s0001g07020	393	315	681	727	598	571	871	662	447	467	463	308	247	480	222	423	382	514
VIT_18s0001g07060	1166	880	1760	1223	1585	1598	1902	1791	1480	958	1155	704	733	1073	670	1125	1015	1327
VIT_18s0001g07070	551	472	933	645	911	952	1017	969	1058	551	602	419	473	498	438	659	617	718
VIT_18s0001g07080	413	517	656	717	655	663	870	648	557	431	458	393	392	507	296	367	459	450
VIT_18s0001g07090	1701	1719	2633	3236	1889	2174	2987	2694	2747	1453	1509	1496	1387	1057	1202	1593	1329	1625
VIT_18s0001g07100	1748	1326	3146	2718	2574	3368	2979	3160	3782	1755	1787	1551	1871	1598	1510	1919	2049	2311
VIT_18s0001g07110	309	406	852	1137	509	878	889	627	574	480	573	432	405	499	269	393	358	450
VIT_18s0001g07120	747	685	1387	881	1396	2021	1502	1569	1555	1016	1112	719	883	1096	703	873	1061	1048
VIT_18s0001g07130	1544	1595	3131	3530	2651	3191	3099	2979	2685	1780	2104	2022	1837	2133	1510	1717	1736	2096
VIT_18s0001g07140	2	7	21	16	11	7	8	9	7	1	8	2	22	4	2	8	6	1
VIT_18s0001g07150	240	190	410	326	387	383	454	318	292	194	268	356	305	166	230	226	224	299
VIT_18s0001g07160	30	12	47	25	31	30	34	27	23	18	12	15	20	8	18	15	25	20
VIT_18s0001g07170	1356	876	2310	1713	2063	2635	2363	2829	2566	1325	1516	1347	1351	1412	1318	1449	1543	2010
VIT_18s0001g07190	81	58	128	53	147	169	163	148	182	55	122	70	94	90	83	125	117	132
VIT_18s0001g07200	6179	5153	12211	10863	9240	13308	12812	13328	11556	7300	6936	7071	6484	7039	5793	6677	6334	8436
VIT_18s0001g07210	1090	592	1650	558	1702	2304	1489	2439	1944	904	1160	819	961	1078	909	1291	1130	1515
VIT_18s0001g07220	46	36	44	55	52	31	56	57	43	42	36	19	23	62	21	47	33	33
VIT_18s0001g07230	1020	1241	1664	2051	1564	1709	2101	1534	1384	907	1108	1256	1325	1152	892	953	803	1105
VIT_18s0001g07240	7225	9006	10835	12504	10345	12079	12826	10049	8669	6913	7725	10699	9251	6916	7777	6238	6648	6288
VIT_18s0001g07250	65	85	121	116	137	119	181	113	121	55	71	65	81	93	61	74	58	81
VIT_18s0001g07260	139	191	274	197	239	234	273	232	225	126	131	142	123	153	105	153	155	130
VIT_18s0001g07270	56	21	64	23	87	102	47	92	126	47	34	26	36	66	37	77	79	110
VIT_18s0001g07280	4509	3125	7975	5277	5636	7272	6153	7576	6878	3750	4341	4058	3825	4059	3662	4612	4763	6094
VIT_18s0001g07290	860	596	1489	935	1447	1602	1384	1773	1609	716	921	684	874	929	749	1106	1024	1241
VIT_18s0001g07300	1921	2097	3296	3094	2487	3258	3791	3111	2929	1724	1942	2296	2141	1758	1947	1738	1936	2177
VIT_18s0001g07310	97	40	146	113	162	169	158	188	153	75	116	69	67	88	73	65	73	120
VIT_18s0001g07320	2018	880	2511	2211	1656	1551	2239	2920	2474	1636	1320	720	780	966	492	1838	928	1589
VIT_18s0001g07350	224	180	443	390	315	453	420	404	344	230	274	259	229	174	183	195	199	278
VIT_18s0001g07360	284	199	457	334	385	576	497	475	399	263	271	265	348	296	209	282	271	374
VIT_18s0001g07370	1170	717	1761	1319	1876	2023	1969	2361	2145	1185	1231	976	1048	1099	978	1338	1273	1726
VIT_18s0001g07380	766	616	1252	909	879	810	1019	1053	969	615	785	575	527	573	277	744	538	765
VIT_18s0001g07390	26	21	22	22	48	33	34	39	28	16	21	33	38	20	25	15	33	25
VIT_18s0001g07400	159	165	217	321	231	275	311	211	238	175	184	208	238	169	181	132	160	158
VIT_18s0001g07410	34	29	45	50	80	58	72	48	63	52	42	33	43	43	32	41	56	31
VIT_18s0001g07430	96	99	161	202	202	194	235	183	223	137	128	120	108	142	119	122	126	198
VIT_18s0001g07440	45	33	82	59	44	69	94	66	42	49	53	31	40	26	38	60	39	38
VIT_18s0001g07450	512	510	793	717	609	757	839	781	681	528	521	388	414	463	313	494	460	518
VIT_18s0001g07470	235	191	379	195	413	493	368	470	524	222	280	158	280	265	173	269	334	358
VIT_18s0001g07480	851	653	1716	1265	1306	1833	1627	1701	1743	904	1019	764	930	891	762	886	983	1160
VIT_18s0001g07490	220	218	371	331	326	370	365	323	342	202	242	210	218	209	191	277	239	240
VIT_18s0001g07500	3380	1941	5334	4343	5087	5685	4179	6137	5363	3340	2820	3839	3280	2340	3547	3273	3075	4090
VIT_18s0001g07510	77	93	174	169	141	144	156	128	176	113	93	65	64	106	76	95	90	114
VIT_18s0001g07520	182	152	348	281	289	368	262	320	332	192	233	161	187	219	176	219	249	258
VIT_18s0001g07540	37	44	47	23	84	65	43	85	61	33	45	34	39	50	30	50	42	73
VIT_18s0001g07550	34	30	70	38	73	69	94	81	51	34	45	31	54	36	37	36	54	47
VIT_18s0001g07590	385	383	719	754	758	826	882	714	707	426	486	632	537	490	565	462	501	487
VIT_18s0001g07600	3962	4230	8511	7024	8366	8615	8783	8346	8139	4697	4708	6475	5860	3836	5564	4973	5027	5985
VIT_18s0001g07610	590	361	1093	776	1054	830	992	1032	1151	505	571	588	551	443	484	753	764	920
VIT_18s0001g07620	470	391	991	721	734	933	759	1051	874	569	580	501	413	532	439	549	597	699
VIT_18s0001g07630	1936	1100	2938	1926	2916	3624	2458	3733	3321	1796	2037	1596	1784	1828	1544	2019	2098	2721
VIT_18s0001g07640	6	9	8	24	50	17	35	25	11	18	6	63	21	16	29	19	8	4
VIT_18s0001g07660	1222	1084	2659	2293	2092	2364	1887	2264	2278	1289	1447	1427	1413	1407	1355	1368	1451	1765
VIT_18s0001g07670	638	566	1080	871	1009	1036	1073	991	1006	601	735	615	677	656	467	699	550	668
VIT_18s0001g07680	1110	737	1844	1562	1405	1542	1631	2094	1652	1001	1219	698	718	1241	610	1341	977	1495
VIT_18s0001g07690	947	1140	1695	1997	1701	1503	1783	1679	1367	1229	965	1793	1386	877	1166	804	987	926
VIT_18s0001g07700	255	136	453	343	827	544	418	395	406	207	253	491	608	301	551	240	364	309
VIT_18s0001g07710	3177	1557	4676	2898	6319	6867	4325	6780	6438	2868	3477	3061	4018	3142	3833	3973	4717	5538
VIT_18s0001g07720	463	439	801	919	758	772	836	766	711	558	660	371	369	547	313	592	506	564
VIT_18s0001g07730	1677	1129	2990	2242	2436	3239	2935	3100	2751	1638	1925	1670	1626	2042	1625	1773	1810	2622
VIT_18s0001g07740	1429	674	2059	1366	2733	2877	2020	2741	2614	1318	1574	1348	1628	1509	1544	1701	1804	2383
VIT_18s0001g07750	195	200	362	361	297	289	405	347	305	177	270	154	134	246	117	239	218	195
VIT_18s0001g07760	153	96	176	168	253	190	220	275	186	137	186	153	153	124	96	146	120	166
VIT_18s0001g07770	923	712	1135	1682	1699	1015	1985	1172	1022	843	920	1440	917	730	675	724	622	651
VIT_18s0001g07780	402	298	564	702	567	589	710	760	529	415	454	322	405	385	331	323	254	455
VIT_18s0001g07790	242	274	449	455	427	538	492	489	481	228	369	235	244	342	230	258	265	320
VIT_18s0001g07800	18	8	21	9	18	30	29	22	26	11	11	20	13	9	20	12	20	9
VIT_18s0001g07810	19369	9195	28200	16450	36341	40038	24789	43487	40107	17213	21623	17765	21273	22990	20252	24270	26660	34157
VIT_18s0001g07820	355	218	604	462	566	713	553	690	607	306	342	341	358	291	284	334	329	470
VIT_18s0001g07830	772	977	1491	1512	1189	1189	1636	1307	1263	784	979	787	699	1029	587	872	828	916
VIT_18s0001g07840	101	172	120	128	70	128	118	108	74	66	89	80	83	57	49	63	59	81
VIT_18s0001g07850	13	15	43	50	70	78	43	27	45	31	30	55	44	20	48	24	23	23
VIT_18s0001g07860	289	265	513	409	455	543	519	548	533	304	364	266	282	332	272	296	326	426
VIT_18s0001g07870	207	152	318	192	195	184	332	236	207	157	170	114	102	162	87	179	144	172
VIT_18s0001g07890	252	281	455	368	411	380	510	388	377	270	304	190	217	365	179	294	236	265
VIT_18s0001g07900	52	36	88	85	94	103	89	89	115	43	44	56	67	39	54	37	48	56
VIT_18s0001g07910	21	16	28	25	34	40	33	41	31	22	22	19	16	22	12	19	12	26
VIT_18s0001g07920	389	251	658	535	630	598	623	582	536	372	417	339	345	369	326	390	407	446
VIT_18s0001g07960	1290	941	1981	1476	1733	1655	1964	1964	1602	1002	1127	834	802	1153	771	1317	1137	1470
VIT_18s0001g07970	87	65	144	101	106	124	153	136	104	93	88	68	74	89	56	69	74	91
VIT_18s0001g07980	595	486	905	838	962	898	874	909	854	552	661	498	566	768	461	591	578	614
VIT_18s0001g08010	2325	2599	3992	4493	3859	5274	3206	3695	3078	3210	2893	4437	4272	2279	2892	2034	2578	2465
VIT_18s0001g08020	242	215	337	346	338	381	426	337	359	236	239	231	219	290	177	259	237	285
VIT_18s0001g08030	490	429	890	766	694	758	824	824	752	432	423	505	413	477	371	464	447	540
VIT_18s0001g08040	18	18	15	17	24	17	35	22	24	9	23	9	16	13	22	15	27	7
VIT_18s0001g08060	2041	2076	3802	4227	2758	3463	3613	3551	3088	1869	2965	1966	1590	2410	1459	2045	2209	2131
VIT_18s0001g08080	29	23	44	63	87	64	84	63	50	57	56	62	61	36	57	52	49	39
VIT_18s0001g08090	558	543	792	1394	1251	1278	1414	946	870	830	1013	1024	905	603	771	533	659	614
VIT_18s0001g08100	142	161	252	230	490	415	451	278	355	224	311	245	355	328	204	227	292	189
VIT_18s0001g08110	617	542	1172	805	891	1018	1019	1072	1023	680	766	583	582	669	486	709	705	834
VIT_18s0001g08120	912	1303	1454	1579	1214	1374	1411	1426	1129	789	926	1153	974	907	821	759	894	775
VIT_18s0001g08130	536	341	774	540	771	1014	588	978	899	446	599	347	464	554	432	595	614	797
VIT_18s0001g08140	1198	808	2092	1321	2071	2297	2037	2570	2274	1237	1501	1106	1241	1615	1043	1564	1547	2027
VIT_18s0001g08150	999	908	1811	1575	1489	1839	1642	1708	1788	1037	1102	913	984	900	860	930	996	1201
VIT_18s0001g08160	57	28	77	87	36	57	55	63	36	55	80	39	44	39	25	47	26	62
VIT_18s0001g08170	24	27	47	48	35	32	28	29	30	28	25	18	20	16	20	16	29	29
VIT_18s0001g08180	180	240	405	354	434	396	372	397	372	221	230	251	244	280	231	262	250	276
VIT_18s0001g08190	155	110	283	183	286	288	283	337	342	149	194	154	188	146	201	180	243	248
VIT_18s0001g08200	320	347	892	827	681	906	723	722	701	507	394	477	463	389	373	494	417	409
VIT_18s0001g08210	803	784	1473	1527	1246	1501	1376	1363	1174	729	813	1078	925	903	866	765	829	946
VIT_18s0001g08220	503	476	896	483	920	986	687	857	876	452	539	546	594	591	503	566	612	621
VIT_18s0001g08230	195	244	417	196	539	315	461	385	441	167	313	282	296	173	329	270	485	255
VIT_18s0001g08240	25	29	58	30	50	56	25	35	44	25	30	16	16	57	12	37	32	31
VIT_18s0001g08250	746	847	1338	1921	1981	2051	1991	1589	1148	1058	998	1726	1568	1118	1532	993	923	751
VIT_18s0001g08260	683	706	1456	1293	976	1639	1476	1026	1385	594	723	909	893	625	811	586	745	807
VIT_18s0001g08270	1052	1051	2450	2447	1293	2573	1913	2053	2207	1033	1181	1539	1040	1467	1293	1261	1497	1816
VIT_18s0001g08280	3132	2440	5547	4265	5402	5870	5109	5992	5330	3285	3754	3155	3559	3275	2817	3338	3486	4076
VIT_18s0001g08290	9726	6582	13809	14415	12953	14840	17695	16130	13716	10023	10364	7558	6819	9644	5640	10116	8213	11836
VIT_18s0001g08300	243	173	399	355	215	334	307	334	273	184	207	237	173	184	182	170	176	222
VIT_18s0001g08310	2112	1685	3343	3496	3225	3463	3947	4352	3440	2511	2354	2523	2327	1749	1861	2340	2171	2803
VIT_18s0001g08320	878	887	1498	951	1843	1554	1661	1320	1220	938	1309	1047	1277	741	825	977	1250	808
VIT_18s0001g08330	39	60	62	82	84	50	91	61	54	59	48	33	40	28	47	43	51	44
VIT_18s0001g08360	121	84	141	100	182	164	150	154	173	104	97	108	119	112	102	85	96	142
VIT_18s0001g08370	849	627	1341	912	1141	1412	1242	1352	1349	676	839	684	738	843	638	758	858	1013
VIT_18s0001g08420	78	58	93	117	85	82	78	85	85	58	61	49	52	46	30	42	45	55
VIT_18s0001g08430	23	12	17	32	28	15	17	15	15	8	18	31	27	13	19	10	22	14
VIT_18s0001g08480	141	150	215	242	182	204	213	151	180	129	127	81	111	129	67	124	123	115
VIT_18s0001g08490	253	132	538	487	348	509	426	453	570	251	240	314	292	160	279	302	247	388
VIT_18s0001g08530	90	65	176	158	153	117	157	121	95	70	90	53	82	75	49	80	54	82
VIT_18s0001g08540	1083	1056	2013	1607	1834	1928	2100	2001	1752	1043	1191	1129	961	1134	1000	1092	1235	1366
VIT_18s0001g08550	141	97	289	155	202	151	189	210	138	94	122	77	81	79	81	126	97	140
VIT_18s0001g08560	227	216	409	465	319	365	437	335	344	207	241	184	223	228	132	244	199	308
VIT_18s0001g08570	139	96	176	253	227	184	257	290	204	146	166	134	109	104	98	169	116	177
VIT_18s0001g08580	3979	2123	6571	4936	3644	5942	4382	8157	6371	3857	3452	2158	2445	3547	1657	4262	2758	5257
VIT_18s0001g08590	164	96	348	293	128	240	234	210	201	126	117	99	89	111	72	143	82	192
VIT_18s0001g08600	73	43	94	130	122	119	181	105	126	88	89	66	111	60	81	88	73	80
VIT_18s0001g08630	304	273	498	449	385	341	443	368	373	203	284	236	243	262	243	254	258	268
VIT_18s0001g08640	329	274	470	520	420	469	583	504	414	336	339	279	290	321	189	290	298	381
VIT_18s0001g08670	388	145	475	150	740	738	471	720	698	313	411	339	480	379	464	472	506	564
VIT_18s0001g08680	2176	1345	3659	2516	3575	4220	4406	3829	3885	2183	2386	2469	2672	2137	2436	2324	2446	3205
VIT_18s0001g08710	10	49	30	72	47	50	58	28	32	32	41	41	32	40	32	18	28	8
VIT_18s0001g08720	919	947	1506	1462	1754	1982	1723	1985	1476	990	1059	951	1016	1132	961	1031	1071	1187
VIT_18s0001g08750	4	13	11	20	18	10	21	5	9	7	23	6	6	8	8	7	3	8
VIT_18s0001g08760	307	519	582	537	532	216	727	547	510	313	343	285	227	233	232	407	325	368
VIT_18s0001g08770	917	690	1634	1330	1108	1326	1796	1354	1208	864	904	926	873	570	749	835	991	1163
VIT_18s0001g08780	417	262	608	525	572	550	603	563	448	314	384	334	361	249	314	326	289	416
VIT_18s0001g08790	334	359	590	402	495	653	496	507	508	324	334	338	459	298	372	300	319	323
VIT_18s0001g08800	32	47	75	80	100	61	50	57	54	41	39	91	89	50	74	31	53	39
VIT_18s0001g08810	514	397	636	384	495	289	755	568	401	323	412	336	332	152	188	317	380	376
VIT_18s0001g08820	39	30	90	24	55	35	97	59	101	14	43	19	23	16	12	39	81	37
VIT_18s0001g08830	914	783	1385	1194	1510	1643	1668	1429	1439	899	1064	794	968	904	723	924	994	1049
VIT_18s0001g08840	218	215	577	752	439	677	501	430	297	269	308	662	456	284	592	191	268	253
VIT_18s0001g08850	1314	853	2351	1754	2276	2995	2040	2860	2659	1352	1493	1489	1650	1412	1480	1400	1658	2019
VIT_18s0001g08860	830	544	1386	1192	1447	1395	1496	1627	1412	801	979	777	801	974	718	1050	876	1267
VIT_18s0001g08890	2178	1943	3957	3472	3265	3864	3111	3764	3257	2003	2202	2299	2115	2083	1876	2186	2011	2345
VIT_18s0001g08900	71	36	127	117	71	94	80	142	79	67	76	49	61	71	25	55	57	92
VIT_18s0001g08910	4336	3206	6903	5902	4763	5366	5545	6702	5898	3943	3908	2345	2492	4027	1988	3918	3476	5031
VIT_18s0001g08920	159	124	209	184	134	174	183	172	193	144	140	175	151	99	122	113	116	111
VIT_18s0001g08930	9	9	15	33	16	23	29	29	13	20	17	10	29	10	3	12	19	16
VIT_18s0001g08950	34	55	131	101	83	106	99	107	95	60	83	38	46	70	45	75	60	111
VIT_18s0001g08960	67	35	93	31	109	85	77	101	76	72	44	26	41	62	55	52	74	74
VIT_18s0001g08970	695	728	1163	1226	1071	1196	1386	1135	1014	718	772	1034	894	749	691	685	688	745
VIT_18s0001g08980	825	547	1422	1091	1200	1499	1453	1440	1366	717	802	728	718	793	631	795	878	1107
VIT_18s0001g08990	152	67	210	133	124	172	162	178	106	85	98	122	97	62	73	74	94	102
VIT_18s0001g09000	43	47	116	74	19	79	70	107	63	42	35	46	37	43	28	43	41	45
VIT_18s0001g09010	160	128	310	392	183	337	269	297	233	180	210	158	178	218	127	158	126	155
VIT_18s0001g09030	650	540	1203	829	929	957	964	1020	943	628	651	558	583	604	569	692	605	810
VIT_18s0001g09050	396	307	522	470	504	485	659	559	450	298	440	282	302	402	195	374	348	406
VIT_18s0001g09060	286	202	365	416	357	332	581	389	260	208	320	238	236	190	170	246	207	295
VIT_18s0001g09070	524	346	797	616	597	785	727	744	655	418	468	408	411	414	285	480	466	552
VIT_18s0001g09080	704	394	753	741	614	870	797	793	785	532	508	411	385	474	313	434	555	658
VIT_18s0001g09090	88	106	219	241	230	234	172	179	154	121	135	144	115	168	125	122	119	132
VIT_18s0001g09100	694	725	1287	1082	1057	1089	1272	1172	1061	691	781	626	649	749	629	667	676	804
VIT_18s0001g09110	940	710	1547	1101	1244	1451	1402	1250	1084	813	949	871	950	621	649	700	750	930
VIT_18s0001g09130	948	736	1372	1213	1202	1429	1216	1670	1380	1037	964	930	803	756	651	896	795	1077
VIT_18s0001g09140	231	262	312	488	385	411	439	328	240	239	256	458	404	215	319	208	229	163
VIT_18s0001g09150	516	423	716	568	1100	865	1015	931	871	515	598	419	592	524	518	564	528	617
VIT_18s0001g09170	4831	3396	8230	6426	7148	8100	7158	8692	7561	4333	4866	4234	3970	5042	3800	5085	5240	6950
VIT_18s0001g09180	2006	1498	3508	2442	3426	4114	3191	3882	3895	2068	2292	1892	2129	2211	1911	2277	2467	3112
VIT_18s0001g09190	269	141	354	145	359	469	239	343	473	198	279	164	265	239	193	291	297	356
VIT_18s0001g09200	1357	983	2201	1627	2322	2455	2073	2366	2353	1381	1453	1563	1547	1278	1256	1423	1587	1806
VIT_18s0001g09220	1352	1669	2392	2905	2416	2401	3407	2350	2112	1619	1709	1812	1885	1427	1504	1524	1377	1508
VIT_18s0001g09230	2736	2396	4071	4117	3599	3910	4690	4148	4264	2539	2784	2683	3076	1762	1472	2818	2640	2581
VIT_18s0001g09240	95	145	234	226	167	186	316	191	274	174	140	70	131	78	56	164	144	168
VIT_18s0001g09250	9	7	33	29	16	16	20	8	18	8	3	21	22	13	4	3	7	8
VIT_18s0001g09260	385	336	615	638	571	752	715	701	704	346	454	389	386	454	341	459	429	511
VIT_18s0001g09290	1181	1871	2008	1687	1354	1539	2078	1353	1277	942	871	1409	1223	879	914	979	835	936
VIT_18s0001g09300	134	84	202	190	201	184	294	221	176	99	168	131	118	86	96	123	101	130
VIT_18s0001g09310	2454	1696	4266	3076	4450	4567	3971	4838	4673	2452	3041	2687	2434	3011	2248	3039	2905	3598
VIT_18s0001g09320	988	895	1802	1804	1520	1890	1778	2094	1630	1070	1242	1069	990	1127	878	1105	1151	1461
VIT_18s0001g09330	1938	2792	3390	4451	2924	3178	4204	3038	2776	2094	2346	2835	2393	2078	2002	1777	1816	1964
VIT_18s0001g09340	581	452	938	716	841	988	1109	897	888	575	608	715	658	567	540	507	576	634
VIT_18s0001g09350	29	2	8	13	31	32	9	45	21	9	14	15	18	19	20	29	15	31
VIT_18s0001g09360	83	77	215	134	227	250	232	206	228	132	158	110	115	165	110	153	172	173
VIT_18s0001g09370	242	282	407	391	357	376	482	399	350	222	247	265	299	230	231	243	254	277
VIT_18s0001g09380	418	301	687	464	471	540	591	711	723	389	336	209	248	352	209	447	361	473
VIT_18s0001g09390	64	69	111	86	212	117	195	110	90	104	86	82	114	54	66	83	80	72
VIT_18s0001g09400	302	345	892	581	762	442	808	670	510	300	456	257	488	366	262	580	363	633
VIT_18s0001g09410	404	373	587	554	464	530	667	522	506	317	355	347	370	270	262	307	320	372
VIT_18s0001g09420	15478	11875	29392	18440	15893	22053	23477	22854	19932	13243	14201	12205	12281	13123	9287	12647	12428	18454
VIT_18s0001g09430	85	93	179	201	177	185	241	231	231	102	88	81	101	127	83	150	112	120
VIT_18s0001g09460	15564	20284	28925	38635	28071	32339	31235	25040	20922	16433	21429	21226	24046	15169	16002	14512	15855	14898
VIT_18s0001g09470	1021	744	1781	1498	1495	1805	1729	1717	1684	938	1169	1120	1107	981	983	990	1076	1462
VIT_18s0001g09480	870	434	1299	670	1002	1199	1005	1438	1236	741	792	516	592	806	439	831	872	1184
VIT_18s0001g09490	3808	2567	6191	4661	4959	5728	5803	6001	5179	3432	3693	3100	3049	3322	2465	3530	3560	4460
VIT_18s0001g09500	29	42	49	64	71	78	43	69	44	35	40	50	59	19	42	34	29	20
VIT_18s0001g09510	141	198	237	246	250	248	352	230	189	149	187	217	256	141	150	122	171	169
VIT_18s0001g09530	77	49	138	97	115	74	143	100	133	57	62	35	58	89	71	70	89	101
VIT_18s0001g09540	12	0	87	37	9	4	2	11	54	3	2	0	101	36	41	13	8	13
VIT_18s0001g09550	1667	566	2487	1560	1684	2072	2016	2805	2791	1284	1260	927	828	861	666	1854	1237	2199
VIT_18s0001g09560	85	81	157	144	131	187	162	131	126	70	107	99	80	85	81	80	79	113
VIT_18s0001g09570	2137	2400	3698	3442	3866	4073	3547	3702	3266	2152	2612	2593	2744	2640	2384	2156	2196	2589
VIT_18s0001g09580	10	13	13	9	17	27	27	18	19	20	9	13	25	17	13	18	12	7
VIT_18s0001g09600	60	38	119	82	116	138	111	150	110	90	60	56	65	56	73	76	83	126
VIT_18s0001g09610	31	10	27	16	42	55	23	72	49	23	30	9	25	16	28	25	33	36
VIT_18s0001g09630	78	137	144	164	130	187	215	137	139	106	112	91	99	133	48	92	96	73
VIT_18s0001g09640	5	23	24	32	14	16	19	18	28	8	19	13	12	17	7	7	3	13
VIT_18s0001g09650	2243	1508	2801	2755	2356	2837	3442	2412	2083	1563	1738	2632	2196	1569	1571	1369	1726	2080
VIT_18s0001g09660	130	96	224	200	195	234	173	181	206	101	94	160	117	103	116	62	97	112
VIT_18s0001g09670	1943	2714	3630	3838	3113	3022	3274	3147	2819	2017	2114	2283	1838	2364	1521	1749	1689	1709
VIT_18s0001g09680	12	17	11	35	18	6	34	35	11	14	12	15	6	9	14	14	7	6
VIT_18s0001g09690	58	41	90	48	69	100	96	100	97	50	60	34	51	41	28	55	57	49
VIT_18s0001g09700	3197	3583	6212	6754	4496	6022	6388	5736	4641	3468	3831	4461	3567	3276	3040	3059	3276	3662
VIT_18s0001g09710	501	400	790	699	635	737	701	758	739	469	509	421	354	371	332	443	427	583
VIT_18s0001g09850	2696	1967	3100	2762	3007	2714	3701	3706	2507	2197	2308	1878	2083	2135	1221	2246	2065	2732
VIT_18s0001g09890	51	41	120	80	122	108	149	115	97	64	58	56	107	37	76	49	92	58
VIT_18s0001g09900	68	83	106	126	71	97	144	87	76	52	36	90	83	42	53	47	45	55
VIT_18s0001g09910	695	315	1073	917	861	588	1723	1140	1029	611	453	498	474	531	392	899	452	1180
VIT_18s0001g09930	244	198	359	329	406	418	327	443	314	198	231	246	288	254	203	244	245	335
VIT_18s0001g09940	2125	2009	4667	3071	3126	4153	4097	3815	3669	2259	2435	2249	2319	2203	1896	2357	2499	2883
VIT_18s0001g09950	25	11	57	59	37	52	53	31	43	32	32	33	21	18	20	13	15	26
VIT_18s0001g09960	1452	1197	2293	1779	2195	2502	2110	2397	2307	1197	1519	1068	1414	1401	1164	1354	1400	1759
VIT_18s0001g09990	70902	71674	137815	97067	101319	127173	136160	119401	116303	74171	79607	73481	74068	69644	62558	68293	75766	85261
VIT_18s0001g10030	588	556	874	1095	1009	882	1096	1147	872	722	794	636	673	524	436	618	594	590
VIT_18s0001g10040	23	9	39	28	17	26	13	31	33	3	16	5	6	20	1	20	19	15
VIT_18s0001g10080	422	516	750	741	670	733	989	658	632	466	484	395	521	442	315	452	339	401
VIT_18s0001g10090	386	238	461	370	705	706	671	585	616	423	412	302	403	463	297	354	353	443
VIT_18s0001g10100	703	724	971	1129	924	1008	1115	781	717	617	676	887	870	505	599	498	544	552
VIT_18s0001g10120	201	158	369	290	415	282	415	338	376	229	202	279	243	159	235	223	270	238
VIT_18s0001g10130	165	120	203	127	232	197	308	249	175	136	178	97	109	140	60	146	138	153
VIT_18s0001g10150	4825	3239	5322	5729	6382	6172	7241	6154	4844	4171	4425	4573	4223	3159	3569	4025	3403	4899
VIT_18s0001g10170	4908	4092	8346	5751	8929	8551	9129	8880	8242	4903	5725	5670	5569	5047	5746	5330	6126	6615
VIT_18s0001g10180	280	187	649	434	470	312	585	553	727	283	254	367	337	139	275	340	416	412
VIT_18s0001g10210	161	240	496	597	402	381	592	374	334	264	257	343	305	216	295	246	214	305
VIT_18s0001g10230	25	28	58	41	37	40	64	48	67	23	32	55	56	21	35	30	51	38
VIT_18s0001g10250	727	651	1233	1008	1244	1189	1293	1324	1243	763	672	851	757	644	741	840	741	811
VIT_18s0001g10260	6435	4373	11000	8267	10726	11598	9628	12445	11022	6153	7196	5830	6283	6794	5262	7317	6944	8910
VIT_18s0001g10270	17	27	41	30	41	50	48	33	27	17	30	20	28	8	11	28	10	22
VIT_18s0001g10300	295	115	550	406	339	501	335	479	475	235	255	158	202	199	114	294	211	289
VIT_18s0001g10310	80	101	146	180	163	122	132	218	164	99	115	89	66	138	70	120	91	131
VIT_18s0001g10360	6488	4505	10932	10437	7788	9848	9472	10157	8197	6127	7939	4944	4844	6776	3702	6308	5914	7677
VIT_18s0001g10370	1517	1175	2717	2265	2060	2628	2657	2433	2276	1496	1520	1570	1475	1280	1378	1328	1444	1782
VIT_18s0001g10390	742	660	1296	1024	1157	1213	1225	1225	1094	695	809	735	738	776	641	801	841	811
VIT_18s0001g10420	15	12	23	10	25	17	24	25	27	14	19	8	30	5	14	22	12	25
VIT_18s0001g10430	547	434	980	737	865	902	1034	1075	840	571	634	450	457	870	478	728	639	866
VIT_18s0001g10440	2159	2067	3932	2795	4012	4150	4132	4469	4003	2516	2899	2026	2267	2743	2064	2779	2953	3088
VIT_18s0001g10450	2104	1562	3902	2544	3891	4555	3323	3909	3951	2037	2452	3188	2723	2247	3032	2518	3017	3196
VIT_18s0001g10460	166	185	192	289	320	218	315	200	156	159	180	247	211	158	176	144	145	97
VIT_18s0001g10470	2984	2023	5321	3613	4444	5466	4599	5444	4673	3079	3447	2501	2599	3144	2317	3099	3056	4314
VIT_18s0001g10480	1069	1123	1888	2030	1663	2159	1695	1750	1546	1087	1144	1650	1366	1150	1472	1061	1153	1322
VIT_18s0001g10490	102	56	146	135	104	102	129	112	88	78	78	59	69	61	65	97	77	96
VIT_18s0001g10510	8	18	23	19	43	17	24	24	12	13	20	21	34	13	15	12	26	6
VIT_18s0001g10520	148	126	219	245	162	180	249	173	182	97	128	157	158	70	126	94	105	134
VIT_18s0001g10530	42	21	62	60	55	59	102	80	58	20	44	25	30	36	20	57	36	48
VIT_18s0001g10560	8809	6493	15948	9570	14314	17264	15726	17692	16789	9892	10407	7590	8776	9416	7578	10382	10562	13402
VIT_18s0001g10570	144	63	200	48	286	271	185	310	295	117	152	117	132	115	141	192	185	239
VIT_18s0001g10590	729	688	1105	1067	1167	1215	1061	1185	1091	607	668	848	807	778	739	620	666	746
VIT_18s0001g10670	6	9	10	9	12	11	10	9	10	24	1	2	8	5	3	8	6	2
VIT_18s0001g10680	2349	1294	3949	2702	4244	5007	3898	4751	4330	2428	2833	2260	2507	2252	2418	2697	2861	3673
VIT_18s0001g10690	40	45	47	122	128	80	100	55	74	65	59	62	80	63	38	37	53	46
VIT_18s0001g10700	1566	1054	2684	2006	2876	2885	2714	2837	2563	1632	1886	1507	1769	1436	1507	1732	1743	2036
VIT_18s0001g10720	792	770	1376	1184	1151	1132	1400	1118	1166	698	831	762	712	894	746	767	810	968
VIT_18s0001g10730	1037	1053	2132	1674	1784	2180	1881	1715	1789	957	1172	1487	1377	1054	1426	1022	1371	1384
VIT_18s0001g10750	268	216	402	378	437	378	480	514	380	263	364	229	221	292	165	299	239	317
VIT_18s0001g10760	26	14	37	46	26	32	27	20	26	19	19	25	33	18	25	23	15	21
VIT_18s0001g10770	42	29	56	64	67	50	74	46	68	40	43	36	48	36	39	38	42	47
VIT_18s0001g10780	871	1082	1674	1562	1361	1489	1756	1312	1159	865	1042	1013	1020	868	803	809	832	884
VIT_18s0001g10800	982	1180	2145	2140	1989	1965	2408	1613	1556	1131	1123	2644	1777	882	1782	956	1432	1255
VIT_18s0001g10810	128	241	284	180	449	211	358	258	185	133	163	213	216	177	202	151	160	139
VIT_18s0001g10820	3284	3313	5489	5581	5055	5206	5808	5100	4585	3130	3529	3554	3139	3963	2857	3496	3181	3650
VIT_18s0001g10830	15	62	25	16	28	11	19	3	10	3	17	5	21	10	21	8	19	7
VIT_18s0001g11030	569	430	897	748	1088	1086	872	1041	989	656	634	640	635	641	669	636	673	754
VIT_18s0001g11040	171	143	224	234	222	259	330	242	178	137	169	172	163	112	125	132	148	132
VIT_18s0001g11060	3237	2094	5631	3767	5186	6257	5126	6241	5810	3196	3350	3146	3324	3074	3175	3439	3713	4481
VIT_18s0001g11070	44	58	145	127	152	102	152	111	92	61	100	98	93	67	134	43	112	71
VIT_18s0001g11080	690	561	1147	891	934	1017	909	1128	1077	576	698	523	561	570	525	656	694	730
VIT_18s0001g11090	181	95	279	259	262	218	279	341	271	159	170	146	120	109	145	191	171	257
VIT_18s0001g11120	113	96	153	221	195	143	209	174	131	97	96	126	127	153	108	137	109	107
VIT_18s0001g11130	3599	2076	5302	5241	4047	3253	5237	4872	4437	2882	3062	2314	2455	1726	1613	3418	2785	3655
VIT_18s0001g11140	300	360	448	529	666	723	603	495	528	358	348	462	425	348	537	350	461	346
VIT_18s0001g11150	146	168	303	315	511	329	447	300	304	216	288	409	361	190	357	198	277	158
VIT_18s0001g11160	95	100	132	155	202	159	169	127	134	101	174	75	96	160	59	114	128	116
VIT_18s0001g11170	18	19	31	35	34	27	30	19	29	19	37	18	18	17	2	14	19	19
VIT_18s0001g11190	125	110	222	251	186	161	279	202	184	120	129	123	89	137	69	96	128	146
VIT_18s0001g11200	18	9	38	27	42	38	44	44	39	24	19	11	22	30	18	32	24	46
VIT_18s0001g11220	239	159	385	260	440	464	357	444	420	205	275	273	325	254	274	271	289	364
VIT_18s0001g11240	21	15	47	19	36	30	23	33	59	26	16	19	18	13	12	20	27	27
VIT_18s0001g11250	2144	2672	3336	3643	4447	4215	4784	3766	3527	2916	2940	3280	3392	2266	2721	2401	2566	2493
VIT_18s0001g11260	4842	3826	8538	8751	7340	9369	8032	9171	8823	5411	5987	5491	5066	4938	4681	5496	5130	6231
VIT_18s0001g11270	3107	2339	5095	4929	4753	5334	4644	5189	4538	2852	3327	3511	3024	3632	2836	3202	3286	4047
VIT_18s0001g11290	2547	2035	3765	4266	3828	3749	4548	4407	3820	2405	2697	2359	2470	1986	2124	2627	2298	2554
VIT_18s0001g11320	36	16	42	19	26	22	26	21	48	15	16	9	18	17	13	30	24	31
VIT_18s0001g11350	110	38	156	90	148	165	163	189	162	101	108	84	90	77	83	113	97	167
VIT_18s0001g11360	8	3	9	4	20	12	15	15	9	11	7	3	21	15	5	8	4	10
VIT_18s0001g11370	177	180	257	303	217	296	264	203	174	160	133	171	174	129	154	126	155	147
VIT_18s0001g11380	1653	1758	2680	3109	2219	2650	2980	2474	2068	1595	1841	1684	1571	1651	1266	1476	1526	1681
VIT_18s0001g11500	0	0	14	25	3	0	1	1	11	1	0	0	49	3	22	0	1	0
VIT_18s0001g11520	345	196	436	503	341	615	517	253	301	230	236	437	602	213	421	121	232	267
VIT_18s0001g11570	37	47	87	77	145	60	127	51	56	41	72	92	67	52	85	24	87	44
VIT_18s0001g11580	23	28	25	15	31	16	29	33	26	11	6	27	20	4	28	13	35	20
VIT_18s0001g11590	27	19	29	36	84	42	74	46	55	39	42	43	40	29	34	43	47	28
VIT_18s0001g11600	65	85	137	204	278	167	156	120	141	128	191	179	186	127	183	91	150	83
VIT_18s0001g11610	1041	1592	1720	2312	2381	1658	1834	1685	998	1557	2222	1750	1302	1634	921	993	1147	1094
VIT_18s0001g11620	20	44	53	41	100	49	80	52	44	33	44	28	26	40	28	54	50	29
VIT_18s0001g11630	5943	3943	12432	12906	8066	9367	11674	14905	15397	7455	5273	6101	4662	4146	3982	7697	5701	9068
VIT_18s0001g11640	105	93	153	155	163	123	222	126	124	86	110	81	89	86	66	104	122	111
VIT_18s0001g11650	7	12	30	21	34	35	47	33	17	21	17	16	9	19	23	17	14	20
ENSRNA049468587	84	111	142	167	77	95	155	112	79	77	66	56	64	52	32	71	53	54
VIT_18s0001g11680	325	174	450	487	383	275	487	565	576	307	204	180	136	146	122	434	159	208
VIT_18s0001g11690	487	464	750	781	883	985	937	870	741	473	536	588	586	532	474	465	569	656
VIT_18s0001g11700	2071	1467	3660	2371	3381	3738	3696	4100	3801	1884	2391	1732	2016	2376	1869	2367	2376	3125
VIT_18s0001g11710	30	10	18	20	27	35	19	11	18	14	19	35	37	7	46	13	9	15
VIT_18s0001g11720	1282	964	2129	1730	1934	2018	1896	1960	1920	1122	1235	1421	1317	1057	1274	1180	1215	1459
VIT_18s0001g11730	63	59	68	70	88	69	82	54	59	35	56	106	68	22	42	51	31	34
VIT_18s0001g11740	1492	1350	2442	2090	2479	2897	2346	2629	2629	1480	1691	1634	1505	1532	1452	1635	1761	1851
VIT_18s0001g11750	83	108	195	285	183	158	220	125	143	109	157	195	174	76	139	98	100	86
VIT_18s0001g11760	1095	846	2060	2019	1963	2003	2279	2106	1615	1127	1356	2227	1439	1175	1748	1054	1370	1900
VIT_18s0001g11770	46	29	58	182	81	77	80	72	40	41	30	155	128	51	131	33	30	54
VIT_18s0001g11790	74	43	103	72	152	94	73	164	121	80	63	69	64	14	71	99	47	67
VIT_18s0001g11820	2421	1829	4081	3947	3494	3870	4015	4219	3921	2265	2418	2726	2428	2037	2382	2423	2236	3089
VIT_18s0001g11830	77	23	102	131	50	43	95	91	93	71	65	25	43	42	25	69	57	47
VIT_18s0001g11850	127	52	179	80	215	201	157	248	245	100	144	105	115	99	100	158	163	218
VIT_18s0001g11870	28	12	28	46	68	49	59	88	41	47	52	38	37	26	29	28	41	72
VIT_18s0001g11880	70	20	75	53	88	89	70	135	82	44	53	23	45	49	26	59	39	85
VIT_18s0001g11890	3570	2947	5713	6118	4038	5463	5320	5474	4619	3326	3459	3239	2859	3144	2365	3135	2830	3704
VIT_18s0001g11900	739	380	1222	1274	751	887	880	1226	997	600	616	628	497	522	341	618	529	817
VIT_18s0001g11910	389	261	614	773	527	627	641	561	457	385	380	528	416	307	372	271	321	411
VIT_18s0001g11930	5046	4718	8708	8088	4848	7639	8215	7016	6098	4177	4440	7128	4842	3349	4735	3733	4482	5020
VIT_18s0001g11940	2160	1479	3524	2641	2894	3966	3670	3760	3488	1982	2285	2102	1892	2432	2188	2142	2447	2916
VIT_18s0001g11950	261	79	445	375	334	295	636	465	422	266	342	182	201	141	194	299	269	476
VIT_18s0001g11970	54	113	136	152	105	148	193	113	105	82	84	101	109	65	85	59	75	73
VIT_18s0001g11980	2966	2470	3700	3759	3802	4169	4564	4436	3694	2673	3071	2127	2385	3253	1912	2835	2466	3154
VIT_18s0001g11990	663	576	846	769	677	907	771	810	726	478	594	526	449	532	391	492	493	550
VIT_18s0001g12000	264	198	461	302	464	471	392	387	355	252	300	330	316	239	252	216	266	274
VIT_18s0001g12020	26	32	70	89	71	57	64	75	54	23	35	87	82	60	61	34	47	40
VIT_18s0001g12030	41	37	57	42	65	48	68	56	49	39	39	70	47	35	47	29	42	34
VIT_18s0001g12040	11	12	48	5	17	22	9	22	20	13	3	16	16	11	5	9	14	21
VIT_18s0001g12050	10	12	30	17	9	13	18	13	16	9	18	11	14	6	8	21	13	15
VIT_18s0001g12060	34	48	76	73	66	49	82	65	44	25	53	52	40	21	35	31	49	49
VIT_18s0001g12080	924	793	1779	1349	1301	1604	1364	1508	1585	767	898	1029	918	866	925	986	933	1167
VIT_18s0001g12090	166	164	252	360	322	287	363	279	181	188	178	164	211	239	167	176	219	166
VIT_18s0001g12100	319	133	384	393	434	422	426	420	347	332	346	246	336	215	218	252	267	261
VIT_18s0001g12110	110	60	166	72	213	216	102	170	190	89	133	103	113	105	115	111	109	171
VIT_18s0001g12120	1309	1019	2185	2168	1692	2029	1882	2031	1797	1219	1493	1302	1034	1216	1019	1303	1296	1800
VIT_18s0001g12130	896	1012	1828	1920	1615	1936	1702	1992	1801	1130	1150	1118	1184	1030	941	962	957	1272
VIT_18s0001g12160	1837	1543	3178	2856	2717	2945	3284	3065	2605	1759	2204	1270	1599	1848	1184	1940	1867	2258
VIT_18s0001g12220	401	499	877	771	982	827	541	870	814	497	601	770	637	552	521	502	561	512
VIT_18s0001g12230	620	379	1031	691	963	1258	1028	1159	938	534	658	709	704	658	641	679	704	876
VIT_18s0001g12240	16261	14944	25956	25662	24417	27814	32414	27139	23788	17064	18420	15956	16883	16961	12541	15952	15998	18282
VIT_18s0001g12250	1329	1083	2202	1748	1822	2132	2181	2200	1945	1255	1455	1075	1234	1365	1139	1397	1392	1792
VIT_18s0001g12260	2621	1226	3313	2771	4270	4447	3628	4597	4002	2196	2392	3828	3091	1907	3482	2415	2848	3660
VIT_18s0001g12270	899	850	1823	1434	1308	1695	1415	1632	1586	961	1064	990	896	923	732	810	943	1164
VIT_18s0001g12280	129	118	306	201	238	273	308	289	324	154	206	128	135	176	116	202	167	210
VIT_18s0001g12290	728	577	1273	1318	870	1158	1198	1272	1018	624	823	846	545	833	556	644	744	892
VIT_18s0001g12300	4	13	26	30	11	11	29	36	24	15	13	8	16	10	10	21	19	22
VIT_18s0001g12310	44	34	80	131	79	72	98	83	74	49	46	74	65	34	70	30	43	28
VIT_18s0001g12330	39	7	27	15	29	21	18	33	17	22	25	6	17	22	5	27	15	31
VIT_18s0001g12340	134	116	213	193	223	183	225	185	163	100	108	191	139	110	99	128	109	121
VIT_18s0001g12350	3512	2273	6029	3846	6468	6908	5393	7457	7085	3396	3970	3564	3909	4275	3495	4357	4628	5755
VIT_18s0001g12360	223	255	465	515	284	352	418	378	314	222	244	218	149	228	160	198	178	259
VIT_18s0001g12370	983	992	1867	1687	1480	2069	1837	1795	1651	978	1090	1171	1175	1139	988	976	1052	1259
VIT_18s0001g12380	388	307	559	526	473	540	464	483	429	291	332	377	318	301	333	306	283	350
VIT_18s0001g12390	322	501	880	1026	925	882	822	639	680	361	450	573	655	642	501	462	513	353
VIT_18s0001g12420	1584	1328	2720	2528	1948	2228	2356	2557	1965	1581	1634	1417	1202	1468	1114	1622	1331	1856
VIT_18s0001g12430	2618	2577	4327	4703	4302	4820	5312	3798	3474	2829	2739	3914	3724	1805	2764	2117	2416	2757
VIT_18s0001g12440	239	222	300	284	483	412	390	366	366	260	197	326	401	177	298	213	231	272
VIT_18s0001g12450	252	263	402	423	420	363	602	366	324	238	268	360	326	176	256	227	252	258
VIT_18s0001g12460	1147	798	1849	1200	1502	1788	2238	1996	1674	1108	1207	785	866	1048	688	1116	1112	1502
VIT_18s0001g12470	567	468	1023	633	928	935	1137	994	890	485	703	416	514	687	486	609	637	658
VIT_18s0001g12480	1499	1306	2476	2630	2675	2900	2478	2947	2534	1741	1885	1754	1679	1623	1350	1659	1492	1835
VIT_18s0001g12490	81	47	81	93	134	115	94	107	91	56	75	78	83	40	93	48	91	55
VIT_18s0001g12500	63	84	97	114	71	123	115	97	65	62	66	95	123	48	71	44	55	58
VIT_18s0001g12510	927	876	1426	1611	1707	1894	1718	1440	1548	1010	1037	1524	1450	816	1114	855	1002	975
VIT_18s0001g12520	2071	1364	3121	2478	3423	4052	3757	4012	3883	2439	2376	2264	2503	1673	1935	2403	2127	2838
VIT_18s0001g12530	12	3	21	38	18	17	27	19	14	7	10	29	24	8	23	11	11	14
VIT_18s0001g12540	259	194	453	316	499	552	429	569	492	250	288	305	326	222	330	287	340	426
VIT_18s0001g12550	223	216	364	339	375	263	394	350	318	219	270	169	199	258	116	238	229	258
VIT_18s0001g12560	883	813	1530	1411	1180	1702	1445	1496	1478	806	897	959	1000	768	836	767	948	1029
VIT_18s0001g12570	1024	858	1983	1608	1517	1979	1612	1946	1866	982	1100	957	946	1181	823	1096	1130	1377
VIT_18s0001g12620	25	19	27	24	35	29	62	37	33	30	16	12	16	10	10	19	22	22
VIT_18s0001g12630	309	299	599	425	571	493	566	582	566	328	373	194	214	346	203	407	405	398
VIT_18s0001g12650	32	16	52	29	92	84	35	72	107	40	57	35	51	71	43	63	50	89
VIT_18s0001g12660	25	27	47	54	95	81	58	94	54	47	69	96	69	48	87	62	47	52
VIT_18s0001g12680	1490	979	1362	3129	2402	2328	2612	1403	1153	1616	2200	3239	2939	1035	1794	784	1192	1075
VIT_18s0001g12690	131	157	271	306	232	255	220	197	143	169	172	256	299	96	182	99	147	144
VIT_18s0001g12700	9	13	27	21	15	23	23	25	20	16	18	27	21	1	13	8	10	8
VIT_18s0001g12710	177	161	275	565	301	293	446	250	188	188	190	502	301	99	257	119	185	187
VIT_18s0001g12720	1430	1189	2635	2851	2091	2535	3263	2705	2296	1468	1349	1702	1239	1101	1347	1523	1354	2058
VIT_18s0001g12730	3449	3719	5975	6192	4859	5695	6756	5279	4480	3244	3588	3405	3188	3673	2778	3285	3507	3457
VIT_18s0001g12740	8	19	55	57	31	29	34	15	22	18	20	22	11	24	15	10	25	14
VIT_18s0001g12750	2471	2844	4479	4285	3877	4413	5276	3909	4120	2475	2370	2888	2568	2423	2227	2637	2625	2340
VIT_18s0001g12760	2483	2445	4437	4004	4039	4170	4522	4126	3364	2521	2683	2730	2324	2839	2020	2512	2416	2737
VIT_18s0001g12770	210	102	375	203	373	310	395	435	342	229	246	197	175	228	172	299	282	319
VIT_18s0001g12780	406	377	766	552	768	839	610	939	760	441	533	482	486	453	448	494	483	603
VIT_18s0001g12800	4486	2400	13351	7006	5166	5235	7555	10088	8130	3472	4176	2875	2644	4441	3091	6192	3848	10368
VIT_18s0001g12830	6793	16546	16623	16104	12785	17516	13336	13593	13730	8352	8273	8825	11788	8812	8465	7840	8458	7183
VIT_18s0001g12840	239	250	408	276	655	294	727	363	303	229	284	245	379	223	266	301	231	223
VIT_18s0001g12850	584	749	926	1030	915	912	1359	820	729	592	647	739	747	578	602	560	583	538
VIT_18s0001g12860	26	20	46	51	48	48	79	37	40	33	26	55	48	25	22	26	16	36
VIT_18s0001g12900	8	4	46	9	16	3	5	20	39	4	5	9	4	7	1	16	35	22
VIT_18s0001g12910	395	291	645	694	539	680	747	607	578	365	420	376	384	465	360	393	425	441
VIT_18s0001g12920	14	7	31	17	23	33	25	42	19	4	16	27	5	20	8	11	14	24
VIT_18s0001g12930	42	20	76	66	35	54	46	62	35	32	50	54	42	39	29	32	34	51
VIT_18s0001g12940	77	52	133	45	146	164	96	143	145	79	87	58	81	90	55	82	100	126
VIT_18s0001g12950	1294	1284	2131	2227	2053	1989	2238	2124	2009	1313	1593	1352	1253	1508	1186	1298	1175	1617
VIT_18s0001g12960	1406	958	2185	1659	1932	2002	2481	2242	1977	1204	1454	1007	1003	1433	1010	1308	1268	1889
VIT_18s0001g12980	227	137	234	257	335	285	349	537	354	269	200	173	165	172	151	237	202	274
VIT_18s0001g12990	27	31	52	90	82	96	81	86	74	57	36	108	68	39	79	21	29	44
VIT_18s0001g13000	1632	1289	2731	2409	2204	2714	2532	2594	2568	1384	1500	1460	1465	1441	1374	1563	1567	1933
VIT_18s0001g13010	415	395	671	649	688	571	610	615	588	414	427	365	343	411	293	440	363	468
VIT_18s0001g13020	63	70	89	117	112	108	97	84	100	82	84	51	67	95	59	54	70	53
VIT_18s0001g13030	24	26	65	72	65	76	76	62	68	39	60	34	76	58	40	34	41	36
VIT_18s0001g13040	117	176	261	407	280	339	407	292	281	194	208	187	237	221	150	159	213	167
VIT_18s0001g13050	609	562	1000	999	955	939	1119	948	837	625	649	682	664	589	625	661	542	637
VIT_18s0001g13060	990	827	1679	1393	1646	1802	1682	1751	1773	1044	1095	845	985	1047	860	999	997	1322
VIT_18s0001g13070	253	237	430	444	356	367	486	391	315	227	287	227	201	283	198	282	252	294
VIT_18s0001g13080	8	12	11	22	77	21	44	19	20	16	22	21	31	25	16	15	14	10
VIT_18s0001g13090	395	351	531	592	648	584	771	590	509	331	386	429	407	305	335	406	347	370
VIT_18s0001g13100	847	556	1514	1058	1309	1669	1386	1634	1483	813	936	769	850	885	749	845	897	1190
VIT_18s0001g13120	345	288	456	575	550	548	728	539	509	365	414	451	382	354	337	363	404	439
VIT_18s0001g13150	1835	1016	2769	1998	2108	3069	2374	2204	2068	1293	1674	1469	1616	1359	1226	1282	1627	2210
VIT_18s0001g13160	135	106	258	239	228	242	262	261	258	135	148	160	133	148	127	169	175	191
VIT_18s0001g13180	809	746	1451	1468	1217	1272	1559	1358	1120	759	916	841	765	899	637	828	726	980
VIT_18s0001g13190	11	8	35	22	12	18	32	32	23	15	23	15	11	13	6	2	7	11
VIT_18s0001g13200	7	3	14	13	17	14	15	29	12	12	10	26	15	5	8	7	11	4
VIT_18s0001g13210	128	141	245	332	372	514	439	364	210	196	173	95	265	245	209	206	234	88
VIT_18s0001g13220	103	88	137	126	178	189	220	191	182	106	125	81	114	146	85	131	124	145
VIT_18s0001g13230	35	23	33	66	94	37	63	59	40	34	32	30	22	14	44	42	35	20
VIT_18s0001g13240	49	34	47	77	47	44	84	55	60	40	34	29	27	32	27	34	39	30
VIT_18s0001g13250	5629	6062	8331	7771	6396	6736	11118	7156	6967	5125	4542	7502	5166	4204	5222	4548	4346	4171
VIT_18s0001g13260	223	254	400	395	433	420	508	373	318	262	306	357	334	267	268	228	265	221
VIT_18s0001g13270	235	164	316	268	350	332	361	341	258	229	209	214	275	171	191	190	237	203
VIT_18s0001g13280	551	615	1071	1079	726	1005	1036	847	925	580	601	540	566	662	500	525	579	687
VIT_18s0001g13290	16	9	28	22	29	30	29	32	30	32	20	11	18	16	13	38	28	38
VIT_18s0001g13300	4	16	25	36	33	26	29	13	17	7	11	16	15	24	20	11	10	9
VIT_18s0001g13310	199	230	394	319	397	426	376	381	354	198	277	233	242	276	221	224	237	245
VIT_18s0001g13320	2	1	36	13	5	14	9	14	23	6	11	13	19	14	6	5	9	11
VIT_18s0001g13330	234	269	510	466	523	565	517	503	544	281	354	427	337	299	357	297	342	343
VIT_18s0001g13340	505	494	932	771	730	1105	729	827	909	428	498	578	694	473	495	376	468	542
VIT_18s0001g13370	1781	1946	2882	2964	2620	2873	3530	2647	2256	1733	1944	1990	1780	1596	1545	1613	1727	1672
VIT_18s0001g13410	24	15	34	29	21	55	36	60	52	16	30	12	31	21	8	21	25	45
VIT_18s0001g13430	1914	1187	3440	1864	2745	3366	2530	4024	3534	2052	1990	1189	1366	2119	1009	2223	2062	2814
VIT_18s0001g13490	27	13	41	14	80	65	34	69	41	35	28	25	34	24	49	46	42	59
VIT_18s0001g13500	480	322	805	697	954	971	867	1016	756	551	486	666	657	369	609	517	590	657
VIT_18s0001g13510	12	14	18	37	39	35	57	26	20	14	21	35	38	17	20	22	23	13
VIT_18s0001g13520	18	4	38	28	28	17	21	15	18	14	35	13	29	20	7	19	23	8
VIT_18s0001g13530	270	305	484	512	429	554	600	527	473	286	329	324	262	436	230	292	359	391
VIT_18s0001g13540	76	44	143	136	94	115	141	124	146	78	44	63	49	54	59	64	85	60
VIT_18s0001g13550	1771	1358	3054	1964	3400	3501	2409	3965	3208	1714	1881	1754	1860	2007	1830	2116	2018	2711
VIT_18s0001g13560	1141	938	1950	1374	1566	1635	1871	1704	1548	1068	1154	702	798	1106	660	1134	1097	1282
VIT_18s0001g13570	181	117	412	223	286	397	329	390	361	217	195	187	237	255	136	273	272	278
VIT_18s0001g13580	11	8	18	18	25	19	38	17	19	21	12	22	16	5	14	12	17	14
VIT_18s0001g13590	199	48	131	186	218	164	249	356	234	230	118	137	113	97	75	218	88	189
VIT_18s0001g13600	320	216	549	807	385	429	612	530	447	376	348	235	278	256	186	313	211	393
VIT_18s0001g13610	2999	1822	3818	3487	3702	3594	3945	4793	3921	2662	2882	2011	2052	2260	1503	2668	2146	3272
VIT_18s0001g13630	4513	4413	8171	6765	5597	6570	8292	6578	5832	4008	4491	4272	3954	4227	3550	4134	3723	4428
[truncated: 16,080 more rows]

## Sheet: Table_S4
Table S4. Mapped paired-reads count assigned to genomic features (genes) of V. vinifera, filtered by a similarity Jaccard index among biological replicates and normalised using the “Trimmed Mean of M-values” (TMM).
	X1A	X1B	X1C	X4A	X4B	X4C	X5A	X5B	X5C	X7A	X7B	X7C	X8A	X8B	X8C	X10A	X10B	X10C
VIT_14s0060g00010	10.8971	8.62694	8.57161	3.17613	20.7492	15.7415	4.06715	17.9543	3.93703	7.43103	10.994	10.6469	17.6534	13.2401	27.3312	11.7478	13.9374	7.10002
VIT_14s0060g00040	594.497	388.212	607.155	624.109	392.697	581.721	484.668	626.963	596.853	445.862	562.89	380.921	300.108	574.138	377.17	643.778	538.912	710.002
VIT_14s0060g00050	108.971	106.399	114.288	104.018	107.588	104.466	128.115	82.5896	76.3783	136.236	80.2559	99.3707	135.343	127.586	88.8263	71.6614	81.3014	73.0287
VIT_14s0060g00060	3496.76	3639.13	3383.64	2823.58	4377.3	3966.15	3630.61	3818.51	3846.47	3720.47	3721.45	4455.12	4279.19	3470.11	5042.6	3698.2	4777.04	3498.28
VIT_14s0060g00080	308.751	356.58	315.007	384.311	266.665	276.192	294.19	293.732	316.537	336.873	347.409	171.533	238.91	251.562	181.752	273.723	245.066	242.415
VIT_14s0060g00090	181.618	185.479	213.576	234.239	164.456	211.795	216.915	183.133	216.536	198.161	204.488	180.997	208.311	109.532	206.35	202.062	212.545	166.343
VIT_14s0060g00100	1180.52	1134.44	1101.45	1160.08	1443.22	1674.33	1345.55	1244.59	1551.19	1454	1554.54	1340.32	1662.95	1626.12	1602.97	1331.02	1452.97	1263.8
VIT_14s0060g00110	3606.94	3084.13	3916.51	2869.63	3393.64	3602.66	3768.21	3741.67	3685.06	3524.79	3297.09	3047.37	3155.26	3563.99	3102.09	3755.76	3429.76	3830.97
VIT_14s0060g00120	326.913	301.943	381.437	358.108	279.729	288.356	275.21	318.868	327.56	269.994	274.849	173.899	307.17	357.482	306.109	449.94	276.425	309.358
VIT_14s0060g00160	111.393	120.777	113.574	146.102	106.051	95.1647	169.464	118.498	88.9768	118.896	112.138	113.567	123.574	154.066	113.424	105.73	105.692	125.772
VIT_14s0060g00170	191.305	156.723	167.861	119.105	239.768	181.743	216.237	220.478	139.371	154.813	183.599	179.814	178.888	278.042	122.99	210.285	148.666	247.486
VIT_14s0060g00200	39.956	14.3782	28.572	8.73435	44.5722	32.1986	19.6579	38.7812	59.8428	47.0632	38.4788	14.1958	35.3069	43.3312	15.0322	27.0199	51.1038	45.643
VIT_14s0060g00210	188.883	127.966	156.432	214.388	175.215	144.536	166.075	151.534	162.993	178.345	204.488	132.494	167.119	179.343	161.254	157.42	156.796	184.6
VIT_14s0060g00230	220.364	257.37	178.575	286.645	252.832	226.821	169.464	250.641	164.568	255.132	212.183	136.043	173.004	257.58	166.72	298.393	221.837	191.7
VIT_14s0060g00240	83.5444	31.6321	79.2874	72.2569	79.9227	80.1387	73.8865	75.4079	64.5672	64.4023	107.741	52.0513	68.26	92.6806	39.6302	44.6415	42.9736	78.1002
VIT_14s0060g00250	257.898	248.743	232.862	332.699	286.646	433.607	346.385	296.604	355.12	397.56	341.912	278.001	450.751	241.933	285.611	324.238	271.779	290.086
VIT_14s0060g00260	102.917	84.8316	82.1446	73.0509	110.662	103.751	82.0208	90.4894	74.0161	99.0804	120.933	138.409	121.22	117.957	133.923	102.206	110.338	82.1573
VIT_14s0060g00270	433.462	464.417	483.581	373.195	442.649	480.832	456.876	576.691	603.94	491.686	471.641	522.879	468.405	416.461	598.553	514.552	428.575	472.658
VIT_14s0060g00280	3197.69	5318.51	3358.64	6880.28	3557.33	3854.53	3281.51	3307.89	3274.82	4228.26	3441.11	10164.2	5369	3355.76	6700.24	3288.2	3157.98	2325.76
VIT_14s0060g00290	54.4855	60.3886	62.1442	77.0211	66.8584	71.5524	60.3294	74.6897	58.268	33.4396	48.3734	57.9663	92.9748	58.9786	90.1929	66.9623	56.911	72.0145
VIT_14s0060g00310	365.658	524.806	444.295	1277.6	679.343	535.927	609.394	820.868	638.585	949.933	1079.61	314.674	296.578	1511.78	311.575	1116.04	465.741	772.888
VIT_14s0060g00320	748.267	730.414	677.157	779.739	688.564	757.74	708.361	671.489	750.397	668.793	726.7	767.757	854.426	755.889	837.701	659.05	761.911	711.016
VIT_14s0060g00340	93.2307	119.339	82.8589	91.3136	69.1638	70.8369	114.558	51.7082	62.205	85.4568	75.8583	53.2343	78.852	96.2916	56.0289	78.7101	68.5255	51.7287
VIT_14s0060g00350	99.2847	132.28	209.29	135.779	135.254	150.26	149.807	180.261	209.45	159.767	126.43	92.2728	123.574	109.532	116.158	156.245	113.822	175.472
VIT_14s0060g00360	2823.56	3319.93	3056.49	2690.18	2797.29	3232.02	3063.24	2866.94	2981.9	2730.9	2695.72	3558.42	3165.85	2702.18	3372.67	2748.98	2814.19	2802.48
VIT_14s0060g00370	1024.33	658.523	1009.31	844.055	831.503	1062.55	860.202	1083.72	1023.63	901.632	904.802	802.064	883.849	860.606	944.292	1026.76	940.774	1204.97
VIT_14s0060g00380	278.481	224.3	277.863	266.795	266.665	299.804	211.492	267.159	248.82	274.948	274.849	343.066	303.639	241.933	321.141	231.431	306.623	286.029
VIT_14s0060g00390	194.937	208.484	224.29	266.001	268.202	215.373	317.915	160.87	215.749	213.023	267.153	251.976	307.17	276.838	204.984	220.858	236.936	234.301
VIT_14s0060g00400	139.241	125.091	102.145	54.7882	228.241	168.148	156.585	192.47	159.056	106.511	179.201	106.469	227.141	210.638	157.154	218.509	218.352	208.943
VIT_14s0060g00410	5529.67	5108.59	5688.69	6054.49	5311.01	6746.67	5532	6199.24	6601.6	5489.05	5954.32	6753.66	5507.87	6201.18	6019.69	5856.26	6187.04	6390.01
VIT_14s0060g00420	1150.25	1127.25	1225.03	1145.79	972.905	1365.22	953.746	1266.85	1224.41	1066.35	998.251	1430.23	1315.77	1020.69	1574.28	1019.71	1103.38	1310.46
VIT_14s0060g00430	1469.9	1506.84	1495.75	1822.3	1480.87	1592.04	1565.85	1342.26	1513.39	1493.64	1411.62	2232.29	2019.55	1089.3	2127.73	1232.34	1450.65	1591.42
VIT_14s0060g00440	325.702	306.256	324.292	283.469	295.099	297.658	281.311	275.777	339.372	267.517	339.713	314.674	268.332	203.416	225.482	319.539	278.748	331.672
VIT_14s0060g00450	61.7502	34.5078	57.144	38.1135	36.8874	45.078	79.9872	45.9629	56.6932	24.7701	59.3673	35.4896	50.6065	49.3494	35.5305	38.7676	78.9786	63.9001
VIT_14s0060g00460	240.947	185.479	217.147	188.185	187.511	274.046	208.102	226.942	259.056	265.04	280.346	172.716	236.556	198.601	221.383	250.227	279.909	304.286
VIT_14s0060g00470	38.7452	20.1295	32.1435	42.8777	39.1928	23.6123	32.5372	22.9814	23.6222	33.4396	27.4849	26.0257	32.9531	32.4984	43.7299	27.0199	33.682	36.5144
VIT_14s0060g00480	25478.6	36651.6	28994.2	33658.2	41940.9	31607.5	34288.1	37686	31998.6	41487.4	49829	28369.2	28200.8	49188.1	31823.1	38887.5	29669.2	29228.7
VIT_14s0060g00540	10.8971	27.3186	32.8578	23.8209	33.8134	22.1812	23.725	25.136	33.8584	26.0086	53.8704	50.8684	36.4838	25.2765	16.3987	18.7964	48.7809	20.2858
VIT_14s0060g00550	7425.77	7736.93	7324.44	6389.57	5377.1	5994.66	6632.16	5997.44	6018.14	6053.81	6436.96	6734.73	6028.06	7132.8	6075.72	6070.07	6132.45	6732.84
VIT_14s0060g00570	515.796	258.808	476.438	281.087	472.62	417.866	399.258	629.117	541.735	391.368	434.261	259.074	295.401	389.981	243.248	512.203	511.038	644.073
VIT_14s0060g00580	4633.69	3745.53	4823.67	3510.41	4203.62	5070.92	3955.3	5504.06	5413.41	4925.53	4494.33	4122.7	3671.92	4771.25	4296.46	4868.28	5102.25	5782.46
VIT_14s0060g00590	1226.53	1249.47	1313.6	1260.92	1203.45	1114.79	1321.14	1411.92	1451.19	1361.12	1313.78	868.311	774.397	1599.64	860.932	1540.13	1408.84	1462.6
VIT_14s0060g00600	6532.21	8215.72	7745.88	9161.54	6930.22	8101.16	7365.6	7185.29	7284.28	7718.36	7283.49	9436.67	8024.08	6977.53	8955.06	6857.17	7408.88	6899.19
VIT_14s0060g00610	513.374	429.909	522.154	364.46	460.324	527.341	437.896	527.137	570.869	423.569	510.119	358.444	440.159	525.993	486.495	536.873	524.975	605.53
VIT_14s0060g00620	320.859	231.49	267.148	208.83	291.257	281.201	296.224	350.467	255.119	261.325	338.614	256.708	151.82	479.05	226.849	352.433	283.394	374.272
VIT_14s0060g00630	4332.2	4126.55	4503.67	4953.96	3372.89	4177.23	4377.61	3877.4	3933.88	3841.84	4052.37	4559.22	3883.76	4388.49	4199.44	3792.18	3833.94	4063.24
VIT_14s0060g00640	1095.76	925.958	1048.59	807.53	1040.53	1165.59	946.967	1155.54	1182.68	914.017	1174.15	838.736	952.109	1317.99	993.488	1143.06	1121.96	1235.4
VIT_14s0060g00650	144.084	168.225	137.146	149.278	161.382	90.156	176.243	133.58	144.883	131.282	126.43	132.494	121.22	149.252	136.656	115.128	138.212	110.557
VIT_14s0060g00670	77.4905	54.6373	52.1439	42.8777	68.3953	62.2506	59.6515	76.8442	69.2916	81.7413	83.554	60.3322	55.3141	83.0515	87.4598	66.9623	80.14	76.0716
VIT_14s0060g00690	13795.7	16076.3	13054.6	15771.8	10607.4	12810.7	14754.9	11459.1	10796.9	14094.2	13483	16550	14653.5	12858.5	13533	11650.3	11954.8	11803.3
VIT_14s0060g00710	141.662	301.943	134.289	181.833	110.662	109.475	126.759	130.707	124.41	118.896	135.226	111.201	104.744	129.994	110.691	139.798	110.338	108.529
VIT_14s0060g00720	885.087	790.803	827.874	1006.83	1033.62	905.853	618.206	892.685	796.854	936.31	782.769	1730.71	983.885	885.882	1585.21	781.227	954.711	686.673
VIT_14s0060g00760	33.9021	77.6425	32.1435	91.3136	76.8487	50.8022	42.705	40.9357	22.0473	56.9712	45.0752	190.461	151.82	38.5166	144.855	25.8451	55.7496	25.3572
VIT_14s0060g00770	23.005	28.7565	20.0004	42.0837	32.2765	28.621	16.9464	18.6724	11.0237	34.6781	43.9758	114.75	43.5451	10.8328	71.0611	23.4955	10.453	12.1715
VIT_14s0060g00790	75.0689	126.528	70.7158	273.941	172.91	110.906	105.746	81.8714	59.0554	144.905	72.5601	569.016	413.09	78.2369	474.196	63.438	121.952	50.7144
VIT_14s0060g00810	530.326	717.474	348.579	1059.24	908.352	543.083	450.775	582.436	431.498	770.35	480.436	1969.67	1231.03	399.61	1917.28	338.336	454.127	311.386
VIT_14s0060g00820	194.937	237.241	178.575	179.451	243.61	165.286	191.834	143.634	136.221	173.391	200.09	236.597	296.578	167.307	258.28	155.071	155.634	120.7
VIT_14s0060g00830	897.195	1498.21	975.735	1206.93	749.275	860.06	899.517	765.569	855.909	917.732	868.522	1013.82	914.448	977.359	989.389	802.373	792.108	762.745
VIT_14s0060g00840	558.174	537.746	647.156	571.703	511.044	596.747	570.756	556.582	585.042	583.336	570.586	578.48	529.603	552.473	471.463	532.174	514.522	543.658
VIT_14s0060g00850	52.0639	46.0104	37.1436	67.4927	61.479	49.3711	63.7186	46.6811	52.7561	64.4023	54.9698	60.3322	47.0758	45.7385	102.492	51.6902	52.2652	36.5144
VIT_14s0060g00860	1990.54	1886.42	1912.9	1580.12	1983.47	1930.48	1620.08	1877.3	2018.12	1712.85	1817.3	1854.92	1890.09	1989.62	2052.57	1881.99	1861.8	1937.29
VIT_14s0060g00870	58.1179	71.8912	66.43	60.3464	56.868	80.8542	65.0744	58.89	85.0397	59.4482	59.3673	41.4045	78.852	56.5713	75.1608	77.5353	91.7545	74.043
VIT_14s0060g00880	54.4855	31.6321	70.0015	22.2329	61.479	61.535	50.1615	89.7713	79.5279	48.3017	70.3613	40.2215	50.6065	75.8296	58.762	51.6902	46.458	91.2859
VIT_14s0060g00890	116.236	116.464	132.86	123.869	99.1348	106.613	87.4437	101.98	79.5279	97.8419	117.635	105.286	69.4369	131.197	122.99	99.856	103.369	124.757
VIT_14s0060g00900	812.439	2162.49	826.446	1284.74	2946.38	983.13	2031.54	884.067	833.075	1226.12	1464.39	2031.19	2117.24	1723.62	1894.05	1448.5	1221.84	622.773
VIT_14s0060g00910	454.046	402.591	395.008	370.019	370.411	339.158	336.895	410.075	382.679	403.753	411.174	331.236	283.632	457.385	255.547	484.008	428.575	437.158
VIT_14s0060g00920	64.1718	70.4534	86.4304	84.9614	77.6172	76.561	52.8729	71.0988	75.5909	64.4023	62.6655	80.443	57.6679	113.143	72.4276	72.8362	69.687	66.943
VIT_14s0060g00930	1859.77	1931	1889.33	1675.41	1945.81	1891.84	1876.99	1942.65	1818.91	2076.97	1894.26	1746.09	1990.13	2028.14	1555.14	1860.85	1696.88	1906.86
VIT_14s0060g00940	13.3187	31.6321	12.8574	16.6747	25.3601	9.30181	25.0807	22.9814	6.29924	16.1006	10.994	7.09791	2.35379	12.0364	8.19935	16.4469	16.2603	8.1143
VIT_14s0060g00950	38.7452	46.0104	55.7154	19.0568	57.6365	58.673	52.8729	70.3807	60.6302	66.8793	54.9698	29.5746	50.6065	38.5166	62.8617	66.9623	72.0099	73.0287
VIT_14s0060g00970	203.413	258.808	182.147	223.917	188.279	142.389	183.022	160.87	171.654	158.529	175.903	141.958	120.043	213.045	154.421	148.022	169.572	170.4
VIT_14s0060g00980	244.579	270.311	214.29	290.616	185.974	163.855	241.317	214.733	178.741	210.546	177.003	169.167	156.527	202.212	144.855	217.334	193.962	192.715
VIT_14s0060g00990	21.7942	61.8264	36.4293	56.3762	53.7941	53.6643	66.4301	40.2175	36.2206	32.2011	38.4788	36.6725	38.8376	71.015	34.164	69.3118	37.1664	49.7001
VIT_14s0060g01010	5934.08	6448.64	5151.54	6612.69	3934.65	4114.98	5910.24	5302.97	4383.48	6887.33	4843.94	4364.03	4308.62	3849.25	3338.5	4924.67	4149.86	4548.07
VIT_14s0060g01030	56.9071	44.5725	47.1438	35.7314	82.2281	65.1127	52.8729	56.0173	66.9294	45.8247	63.7649	83.9919	96.5055	57.7749	114.791	46.9911	66.2026	53.7573
VIT_14s0060g01080	1087.29	703.096	959.306	823.411	813.828	837.163	773.436	906.331	1015.75	894.201	949.877	645.91	722.614	873.846	713.344	1032.63	1088.28	1134.99
VIT_14s0060g01100	1297.97	1570.1	1316.46	1309.36	1296.44	1151.99	1159.81	1199.34	1201.58	1408.18	1146.67	1410.12	1514.67	942.454	1236.74	1118.39	977.94	1040.66
VIT_14s0060g01120	284.535	291.878	252.862	235.033	242.073	237.554	316.56	283.677	277.954	271.233	367.198	146.69	193.011	323.78	195.418	321.889	306.623	290.086
VIT_14s0060g01140	2924.06	2849.77	3274.35	2347.95	2405.36	3024.52	2125.76	3098.19	3366.94	2681.36	2826.55	2509.11	2380.86	3424.37	2831.51	3146.05	3157.98	3699.11
VIT_14s0060g01150	737.37	710.285	647.156	651.106	723.915	656.851	662.267	672.207	611.026	626.684	691.52	563.101	623.755	724.594	437.299	634.38	646.927	683.63
VIT_14s0060g01160	1622.46	948.964	1725.75	1453.87	1515.46	1784.52	1395.71	1790.4	2064.58	1585.29	1635.9	1453.89	1442.87	1469.65	1747.83	1791.53	1830.44	2167.53
VIT_14s0060g01170	2336.82	4668.61	2564.34	3649.37	2172.51	2273.93	3265.92	2042.48	1992.92	2442.33	2404.38	2912.51	2323.19	2721.44	2524.03	2272.02	2015.11	1819.63
VIT_14s0060g01180	32.6913	33.0699	26.4291	29.3792	66.8584	25.0433	49.4836	40.2175	46.4569	24.7701	32.9819	30.7576	28.2455	51.7567	54.6624	41.1172	48.7809	16.2286
VIT_14s0060g01200	805.175	943.212	735.73	773.387	542.552	722.679	713.106	677.953	718.113	795.12	719.004	739.366	607.278	694.503	727.009	636.729	635.313	624.801
VIT_14s0060g01210	1816.18	2139.48	2198.62	2944.27	1706.81	1783.8	2359.62	1969.22	1965.36	2250.36	2258.16	2026.45	1713.56	2208.69	1880.39	2059.38	1758.43	2260.85
VIT_14s0060g01220	35.1129	20.1295	35.715	15.0866	35.3504	32.9141	37.2822	33.0358	37.008	23.5316	37.3794	15.3788	17.6534	52.9604	25.9646	51.6902	42.9736	21.3
VIT_14s0060g01230	918.989	642.707	795.731	657.458	975.21	901.56	765.979	962.348	923.626	839.706	920.194	494.488	767.336	896.715	608.119	1016.18	934.967	958.502
VIT_14s0060g01240	56.9071	18.6917	23.5719	29.3792	62.2475	38.6383	39.9936	47.3992	37.7954	22.2931	31.8825	53.2343	36.4838	32.4984	42.3633	50.5154	20.9061	51.7287
VIT_14s0060g01250	272.427	333.575	282.149	323.171	262.054	266.89	355.875	237.714	228.347	253.894	233.072	301.661	263.625	374.333	267.846	227.907	263.649	224.158
VIT_14s0060g01260	174.354	211.36	188.575	180.245	159.845	180.312	134.894	158.716	147.245	188.253	156.114	126.579	114.159	182.954	153.055	195.013	173.056	134.9
VIT_14s0060g01270	49.6423	63.2642	42.1437	62.7285	65.3214	55.0953	56.2622	51.7082	48.8191	56.9712	53.8704	79.26	58.8448	52.9604	66.9614	49.3406	51.1038	45.643
VIT_14s0060g01280	9708.1	9977.06	9930.92	7452.78	8268.15	8735.11	6744.01	8609.42	9214.21	8785.95	8889.71	7476.47	8869.09	8687.91	7846.78	8188.2	8739.91	9399.41
VIT_14s0060g01290	6803.42	7029.52	6732.28	4784.83	6112.55	6018.99	6558.95	6107.32	5805.54	6269.31	6575.48	6263.91	6236.37	7770.73	6085.29	5965.52	6125.48	6606.06
VIT_14s0060g01300	438.306	519.054	327.864	244.562	220.556	217.519	245.385	202.524	150.394	365.359	242.966	196.376	230.672	299.707	105.225	287.82	221.837	270.815
VIT_14s0060g01320	544.855	552.124	305.006	300.938	312.774	249.718	267.076	271.468	200.001	372.79	326.52	304.027	364.838	329.799	211.817	318.365	295.008	352.972
VIT_14s0060g01330	135.608	140.907	148.575	127.839	194.427	161.708	129.471	180.261	151.182	149.859	195.692	185.729	200.072	162.492	192.685	157.42	150.988	120.7
VIT_14s0060g01340	5511.51	8221.48	5959.41	7435.31	6333.87	6176.4	6472.86	5407.82	5133.88	6307.71	7052.62	7371.18	7329.71	7178.54	6913.42	5361.68	5766.6	5238.8
VIT_14s0060g01360	187.672	248.743	238.576	147.69	292.794	301.236	181.666	241.305	333.072	220.454	226.475	211.754	264.802	268.413	367.604	212.635	341.466	240.386
VIT_14s0060g01370	467.364	680.091	476.438	506.592	454.944	444.34	576.179	436.647	451.97	468.155	444.156	410.496	453.105	539.233	418.167	466.386	479.679	494.973
VIT_14s0060g01390	1948.16	2957.6	2430.76	3627.14	1872.8	1984.15	2775.15	1857.91	1782.68	2000.19	2307.63	2581.27	2073.69	2438.58	2271.22	1739.84	1838.57	1723.28
VIT_14s0060g01400	130.765	86.2694	82.8589	27.7911	179.057	113.053	98.9672	145.789	111.024	110.227	114.337	99.3707	92.9748	166.103	80.627	167.993	126.598	118.672
VIT_14s0060g01410	59.3287	71.8912	74.2873	69.8748	78.3857	79.4231	82.0208	77.5624	69.2916	96.6034	72.5601	55.6003	58.8448	108.328	57.3955	84.5839	58.0725	59.843
VIT_14s0060g01420	36.3237	61.8264	27.1434	49.23	71.4693	34.3451	50.1615	42.372	14.1733	38.3937	45.0752	35.4896	43.5451	37.313	23.2315	64.6127	49.9423	34.4858
VIT_14s0060g01430	141.662	178.29	125.717	116.723	259.749	168.864	185.733	132.143	134.646	190.73	201.189	167.984	233.025	175.732	162.621	165.644	168.41	124.757
VIT_14s0060g01440	346.286	402.591	311.435	359.696	359.652	339.158	376.211	358.367	316.537	343.066	373.794	351.347	341.3	448.959	284.244	371.23	289.201	325.586
VIT_14s0060g01450	386.242	250.181	220.719	215.183	291.257	266.89	275.888	295.168	248.82	272.471	222.078	251.976	330.708	188.972	239.148	283.121	217.191	284.001
VIT_14s0060g01460	329.335	303.381	296.435	275.529	261.286	272.615	231.827	314.559	253.544	315.819	278.147	240.146	294.224	261.191	230.948	291.345	220.675	239.372
VIT_14s0060g01470	319.648	242.992	260.005	252.502	288.183	233.261	353.164	366.985	492.128	450.816	282.545	299.295	203.603	244.34	200.884	428.794	275.263	299.215
VIT_14s0060g01490	4381.84	7298.39	3905.8	4348.12	3370.58	3219.14	4545.71	3084.54	2678.75	4124.22	3837.99	4041.08	3822.56	3631.4	2790.51	3284.68	2857.17	3050.98
VIT_14s0060g01510	9543.44	8601.06	10174.5	9159.15	8456.43	10461	9046.69	10583	9992.17	10195.4	10233.2	9164.59	8398.33	11735.5	8080.46	10220.6	9978.01	11123.7
VIT_14s0060g01520	123.5	113.588	94.2877	96.8718	121.421	94.4491	159.974	114.189	92.9138	111.465	108.84	80.443	75.3213	158.881	86.0932	130.4	121.952	135.915
VIT_14s0060g01530	744.635	823.873	910.733	747.978	534.867	917.301	533.474	713.861	763.783	692.324	600.27	857.664	781.459	687.281	773.472	679.021	681.771	798.245
VIT_14s0060g01540	1760.49	1856.23	1770.75	1728.61	1498.55	1699.37	1520.44	1768.13	1861.43	1867.67	1757.93	1826.53	1457	1751.3	1574.28	1658.79	1665.52	1805.43
VIT_14s0060g01550	2522.07	2902.97	2508.62	2434.5	2628.23	2535.1	2436.9	2466.2	2416.55	2649.16	2620.96	3027.26	2945.77	2784.03	2902.57	2517.55	2514.54	2679.75
VIT_14s0060g01560	2313.82	1660.69	2172.9	1669.85	2127.17	2081.46	2270.82	2289.53	2056.7	2182.25	2149.32	1773.29	2216.09	1752.51	2269.85	2112.25	2225.34	2540.79
VIT_14s0060g01580	1607.93	1373.12	1537.89	1500.72	1370.21	1558.41	1733.96	1383.91	1348.82	1590.24	1578.73	1321.39	1585.28	1363.73	1467.68	1541.31	1398.38	1397.69
VIT_14s0060g01620	210.677	235.803	230.005	278.705	189.816	196.769	267.754	194.624	200.788	268.756	229.774	173.899	183.596	232.303	179.019	216.159	216.03	193.729
VIT_14s0060g01630	5463.08	4511.89	5445.11	3581.88	5683.73	6156.37	5056.14	6176.98	6445.7	6031.52	5537.65	4704.73	5725.6	5925.54	5414.31	5953.77	6164.97	6494.49
VIT_14s0060g01660	2104.35	2074.78	1787.89	1723.05	1659.16	1675.04	1979.34	1625.22	1605.52	2044.77	1730.45	1994.51	1720.62	1752.51	1596.14	1797.41	1903.62	1794.28
VIT_14s0060g01670	26.6374	12.9404	21.429	24.615	13.8328	25.7589	12.8793	25.8541	25.9844	18.5776	18.6897	5.91493	14.1228	7.22187	36.8971	16.4469	18.5832	19.2715
VIT_14s0060g01680	2387.68	1532.72	2175.05	1728.61	2141	2343.34	1740.06	2412.33	2446.47	2111.65	2325.22	2555.25	2314.95	1969.16	2439.31	2046.46	2231.14	2798.42
VIT_14s0060g01690	25.4266	34.5078	19.2861	12.7045	21.5176	30.7675	21.6915	13.6452	34.6458	32.2011	26.3855	21.2937	38.8376	20.462	32.7974	31.719	33.682	21.3
VIT_14s0060g01700	146.505	227.176	117.86	123.869	151.392	138.812	185.055	127.116	121.26	163.483	193.494	123.03	165.942	190.176	113.424	162.119	124.275	122.729
VIT_14s0060g01710	228.839	303.381	185.004	251.708	168.299	166.002	184.377	170.924	155.906	196.922	196.792	224.767	194.188	186.565	248.714	190.314	196.285	149.1
VIT_14s0060g01720	1651.52	1669.31	1406.46	1383.2	1411.71	1269.34	2177.96	1358.78	1247.25	1405.7	1633.7	1541.43	1507.6	1655.01	1358.36	1305.18	1462.26	1424.06
VIT_14s0060g01730	725.263	701.658	682.871	818.646	685.49	636.101	1027.63	583.154	591.341	697.278	757.483	741.732	664.946	695.706	597.186	628.506	585.37	692.759
VIT_14s0060g01740	794.277	785.052	839.303	810.706	697.018	811.404	767.335	754.079	724.413	718.333	694.818	731.085	821.473	708.947	780.305	654.351	761.911	711.016
VIT_14s0060g01750	1136.93	1187.64	1255.74	1385.58	1029.77	1144.12	1361.14	1160.56	1195.28	1140.66	1055.42	1184.17	1183.96	1030.32	1060.45	1080.79	1044.14	1062.97
VIT_14s0060g01760	577.546	946.088	538.583	734.479	432.658	543.798	600.582	485.483	530.711	510.264	502.424	611.603	511.95	510.345	528.858	425.269	512.199	432.087
VIT_14s0060g01870	1064.28	1380.31	1356.46	1835.8	928.332	1418.88	1208.62	993.947	911.815	1166.67	956.474	1904.61	1408.74	1086.89	1556.51	715.439	955.873	1138.03
VIT_14s0060g01880	186.461	342.202	260.005	412.102	197.501	344.167	269.787	214.015	198.426	289.81	266.054	358.444	315.408	281.653	340.273	180.916	202.092	182.572
VIT_14s0060g01910	14.5295	12.9404	26.4291	3.97016	10.7588	7.15524	4.06715	11.4907	4.72443	0	8.79516	0	9.41517	7.22187	9.56591	3.52433	20.9061	16.2286
VIT_14s0060g01920	891.141	1127.25	1051.45	1193.43	829.966	886.534	888.672	810.096	899.217	884.293	1084	980.695	876.787	1045.97	906.029	899.879	941.935	840.845
VIT_14s0060g01930	1605.51	2064.71	1570.03	1766.72	1380.2	1408.15	1422.15	1310.66	1192.13	1558.04	1469.89	1639.62	1627.65	1555.11	1496.38	1490.79	1372.83	1243.52
VIT_14s0060g01940	3.63237	14.3782	3.5715	8.73435	26.1286	7.87076	8.13429	5.74536	2.36222	14.8621	16.4909	13.0128	15.2996	21.6656	8.19935	10.573	6.9687	6.08573
VIT_14s0060g01950	552.12	598.135	586.441	651.106	518.729	543.083	633.797	536.473	507.089	518.934	549.698	668.387	677.892	524.789	629.984	459.338	516.845	520.33
VIT_14s0060g01960	14.5295	28.7565	24.2862	11.1164	12.2958	9.30181	6.77858	20.8269	16.5355	13.6236	9.89456	9.46388	10.5921	12.0364	4.09968	14.0973	12.7759	11.1572
VIT_14s0060g01970	416.511	514.741	425.723	334.287	477.23	388.529	375.533	542.218	532.286	507.787	472.74	276.819	333.062	516.363	311.575	526.3	447.158	453.387
VIT_14s0060g01980	5279.04	4539.21	5236.54	4452.13	5024.37	5767.84	5557.76	4663.8	4841.75	4298.85	4399.78	6672.04	6616.51	3650.65	6752.17	4331.4	4406.54	5460.93
VIT_14s0060g01990	632.032	675.777	378.579	728.127	516.423	507.306	639.22	371.294	251.97	589.528	498.026	1115.55	872.08	304.522	743.408	325.413	370.502	368.187
VIT_14s0060g02000	124.711	106.399	43.5723	46.8479	36.8874	39.3538	34.5708	50.9901	36.2206	74.3103	48.3734	83.9919	82.3827	13.2401	60.1286	54.0397	45.2965	60.8573
VIT_14s0060g02050	122.29	209.922	115.717	171.511	116.042	120.924	157.263	103.416	88.9768	146.144	105.542	145.507	134.166	92.6806	144.855	123.352	104.53	87.2288
VIT_14s0060g02060	71.4365	84.8316	54.2868	77.8151	55.3311	43.647	78.6315	56.0173	58.268	60.6867	58.2679	73.3451	64.7293	49.3494	66.9614	48.1659	70.8484	38.5429
VIT_14s0060g02070	566.649	713.16	654.299	641.577	594.809	560.971	526.696	626.244	618.9	676.224	603.568	697.961	639.054	606.637	639.55	558.019	528.459	620.744
VIT_14s0060g02090	168.3	230.052	197.147	223.917	298.173	175.303	171.498	212.578	175.591	211.784	252.861	186.912	94.1517	452.57	151.688	323.064	210.222	201.843
VIT_14s0060g02100	101.706	96.3342	90.0019	100.842	66.8584	122.355	147.095	114.189	111.812	127.566	122.033	89.9069	102.39	108.328	118.891	92.8074	105.692	120.7
VIT_14s0060g02110	1842.82	3459.4	1747.89	2127.21	1638.41	1431.76	1607.88	1476.56	1382.68	1470.11	1827.19	1783.94	1637.06	1778.99	1570.18	1518.99	1463.43	1323.65
VIT_14s0060g02120	187.672	162.474	211.433	157.218	226.704	206.786	210.136	196.779	214.962	175.868	207.786	179.814	240.087	220.267	198.151	202.062	203.254	221.115
VIT_14s0060g02130	19.3726	24.443	17.1432	23.8209	34.5819	10.7329	25.7586	28.7268	22.8347	17.3391	25.2861	37.8555	21.1841	13.2401	16.3987	18.7964	12.7759	13.1857
VIT_14s0060g02140	11438.3	13895.1	12170.3	16977.2	12255.1	10546.1	11061.3	11176.9	9417.36	12939.9	12256.1	18066.5	12436.3	11677.8	13410	10852.6	9212.62	9715.87
VIT_14s0060g02150	1281.01	1482.4	1152.88	1865.18	1020.55	1039.66	1081.86	1155.54	959.847	1416.85	1204.94	1343.87	1032.14	1210.87	867.765	1101.94	711.968	999.074
VIT_14s0060g02160	1140.56	1161.76	1008.59	1059.24	1120.45	1190.63	1083.22	1034.88	1047.25	1050.25	1134.58	1085.98	1192.2	1094.11	953.858	932.773	1027.88	923.002
VIT_14s0060g02180	78.7013	71.8912	67.1443	32.5553	40.7298	45.7935	56.2622	41.6539	62.205	64.4023	50.5722	56.7833	57.6679	56.5713	69.6945	69.3118	67.3641	54.7716
VIT_14s0060g02190	79.9121	84.8316	94.2877	93.6957	66.0899	81.5697	94.9001	58.1718	57.4806	84.2183	64.8643	74.5281	76.4982	83.0515	71.0611	55.2145	62.7183	82.1573
VIT_14s0060g02200	808.807	862.694	867.875	768.622	731.6	843.603	791.738	790.705	800.791	812.459	722.303	696.778	681.423	908.752	773.472	886.957	765.395	821.573
VIT_14s0060g02210	439.516	427.034	493.582	344.61	463.398	470.815	389.768	498.41	533.861	444.623	416.671	380.921	395.437	483.865	429.1	555.67	509.876	464.544
VIT_14s0060g02220	869.346	1220.71	927.162	1007.63	867.622	992.431	938.155	896.994	966.933	951.172	1070.81	925.094	923.863	1126.61	818.569	822.344	865.28	895.616
VIT_14s0060g02240	2298.08	3214.97	2664.34	2536.93	2320.83	2332.61	2077.63	2467.63	2220.48	2369.26	2516.52	2583.64	2196.09	3254.65	2500.8	2324.88	2329.87	2496.16
VIT_14s0060g02250	260.32	296.192	245.005	275.529	368.874	339.874	339.607	279.368	307.875	294.764	305.632	448.351	424.859	314.151	505.627	293.694	349.596	270.815
VIT_14s0060g02260	13619	16585.3	13880.3	14127.4	11959.2	13056.9	15685	12849.5	12103.2	14685	14463.6	13676.5	12619.9	14809.6	12074.9	13054.1	12714.4	13038.7
VIT_14s0060g02270	2399.78	3232.23	2270.05	2675.89	2173.28	2062.86	2453.85	1977.12	1838.59	2503.02	2266.95	2684.19	2551.51	2447.01	2257.56	2273.19	2209.08	1902.8
VIT_14s0060g02280	8544.54	10727.6	10113.1	10871.9	9184.19	10068.1	8055.66	9967.48	9855.16	9462.18	9996.8	11370.9	9707.04	9809.7	9325.4	8813.18	9184.74	8550.45
VIT_14s0060g02290	979.528	1022.29	804.302	839.291	972.136	831.439	1088.64	849.595	822.838	875.623	880.616	909.716	996.831	1058	889.63	859.937	972.133	908.802
VIT_14s0060g02300	2669.79	2924.53	2208.62	2162.94	1741.39	1728.71	2173.89	1559.87	1397.64	1852.8	1724.95	2623.86	2411.46	1351.69	1783.36	1511.94	1655.07	1559.98
VIT_14s0060g02310	1541.33	2378.16	1417.89	1904.88	1422.47	1218.54	1688.54	1279.78	1120.48	1507.26	1374.24	1440.88	1446.41	1550.29	1229.9	1460.25	1272.95	1220.19
VIT_14s0060g02320	1379.09	977.72	1475.03	587.583	1360.99	371.357	963.236	1576.38	1811.82	786.451	677.227	363.176	422.506	486.272	396.302	2275.54	2001.18	1447.39
VIT_14s0060g02340	207.045	106.399	148.575	128.633	344.282	156.7	261.653	130.707	128.347	159.767	112.138	158.52	287.163	121.568	192.685	152.721	161.441	152.143
VIT_14s0060g02350	862.082	595.259	681.443	667.78	686.259	788.507	627.019	697.343	728.35	775.304	727.8	722.804	746.152	616.266	713.344	747.158	771.202	774.916
VIT_14s0060g02360	194.937	312.008	175.718	213.594	97.5979	145.967	145.062	140.043	105.512	182.06	120.933	221.218	120.043	163.696	132.556	143.323	166.087	191.7
VIT_14s0060g02370	290.589	212.798	240.005	241.386	285.877	281.916	315.882	260.696	247.245	250.178	253.96	224.767	236.556	294.893	274.678	286.646	306.623	277.915
VIT_14s0060g02380	1368.19	1242.28	1241.45	1100.53	1087.41	1100.48	987.639	1156.25	1143.31	1202.59	1296.19	933.375	1105.11	1230.12	931.993	1238.21	1202.1	1225.26
VIT_14s0060g02390	1978.43	1314.17	1372.17	2040.66	1388.66	1174.89	1717.01	1964.91	1503.16	2275.13	1503.97	2067.86	1304	1240.96	1262.7	1690.5	995.362	1347.99
VIT_14s0060g02400	1937.26	1545.66	2057.9	1457.05	1917.38	2256.76	1467.56	2302.45	2348.04	2176.05	2182.3	1741.35	1621.76	1915	1637.14	2135.74	2347.29	2559.05
VIT_14s0060g02410	3570.62	3206.35	3519.36	3663.66	3718.71	3501.77	3524.18	3878.12	3785.84	3582.99	3626.9	3952.35	3629.55	3843.24	3494.29	3644.16	3584.23	3928.34
VIT_14s0060g02420	565.438	494.611	561.44	440.687	640.918	596.747	634.475	565.918	626.774	601.913	618.96	348.981	540.195	592.193	419.534	695.468	721.26	668.416
VIT_14s0060g02430	21.7942	44.5725	42.858	45.2598	23.0546	23.6123	34.5708	11.4907	25.197	28.4856	36.28	33.1236	18.8303	50.5531	38.2637	35.2433	27.8748	28.4001
VIT_14s0060g02440	507.321	460.104	406.437	544.706	772.329	435.038	624.985	512.055	395.277	624.207	888.311	842.285	641.408	560.898	751.608	576.815	619.052	544.673
VIT_14s0060g02630	249.422	73.329	173.575	155.63	82.2281	195.338	145.062	140.761	111.812	229.123	231.972	66.2472	60.0217	58.9786	60.1286	96.3317	188.155	269.801
VIT_14s0060g02640	564.228	448.601	479.296	347.786	648.603	608.195	477.212	639.89	670.082	536.273	572.785	522.879	591.979	574.138	539.791	534.524	556.334	603.501
VIT_14s0060g02670	15.7403	7.18912	17.1432	7.94031	26.1286	14.3105	14.9129	10.7726	6.29924	17.3391	17.5903	11.8299	18.8303	6.01822	8.19935	16.4469	17.4217	13.1857
VIT_14s0060g02680	717.998	718.912	650.728	744.007	653.214	665.437	646.676	626.244	627.562	608.106	801.459	602.139	695.545	702.928	594.453	609.709	657.38	765.787
VIT_14s0128g00010	33.9021	30.1943	30.7149	19.8508	40.7298	30.052	29.1479	40.9357	26.7718	35.9166	27.4849	17.7448	32.9531	37.313	20.4984	29.3694	31.3591	44.6287
VIT_14s0128g00020	221.574	258.808	262.148	237.415	163.688	196.769	214.881	218.324	231.497	177.106	234.171	86.3579	132.989	233.507	105.225	213.809	234.613	252.558
VIT_14s0128g00040	145.295	61.8264	187.861	126.251	92.2184	119.492	101.679	107.726	124.41	100.319	109.94	91.0898	69.4369	78.2369	88.8263	132.75	87.1087	117.657
VIT_14s0128g00050	58.1179	83.3938	66.43	70.6688	102.977	94.4491	78.6315	56.0173	84.2523	58.2097	67.0631	124.213	124.751	67.4041	150.322	57.5641	95.2388	56.8001
VIT_14s0128g00060	10.8971	17.2539	17.1432	26.203	7.68487	18.6036	12.8793	9.33621	9.44886	12.385	8.79516	37.8555	10.5921	21.6656	15.0322	9.39822	17.4217	16.2286
VIT_14s0128g00070	19.3726	12.9404	22.1433	21.4388	20.7492	25.0433	17.6243	14.3634	18.1103	18.5776	28.5843	28.3916	22.361	24.0729	24.5981	17.6217	30.1977	24.3429
VIT_14s0128g00080	125.922	168.225	180.718	176.275	102.209	179.596	139.639	156.561	165.355	130.043	113.238	255.525	228.318	149.252	215.916	117.478	155.634	174.458
VIT_14s0128g00100	427.408	488.86	439.295	470.067	560.996	530.919	447.386	465.374	459.057	484.255	577.182	641.178	662.592	540.436	696.945	486.358	461.095	423.972
VIT_14s0128g00110	6.05394	7.18912	5.7144	5.55822	16.9067	12.1639	9.49001	17.2361	9.44886	7.43103	5.49698	26.0257	21.1841	7.22187	27.3312	5.87388	13.9374	3.04286
VIT_14s0128g00120	11950.5	13026.7	12001.7	14226.7	13541.5	11167.2	13875.1	14237.7	12628.4	14982.2	14569.2	12175.3	13753.2	10802.7	9881.59	12835.6	13094.2	11094.3
VIT_14s0128g00150	372.923	379.585	349.293	405.75	403.456	391.392	395.191	333.231	307.088	370.313	435.361	457.815	486.058	329.799	362.138	296.044	288.039	398.615
VIT_14s0128g00160	77.4905	109.275	90.0019	67.4927	115.273	76.561	100.323	86.1804	100	97.8419	122.033	82.809	69.4369	98.6988	91.5595	112.779	101.046	130.843
VIT_14s0128g00170	145.295	138.031	131.431	134.985	134.485	124.501	126.082	119.934	111.024	132.52	137.424	144.324	115.336	98.6988	109.325	131.575	145.181	119.686
VIT_14s0128g00180	1587.34	1281.1	1655.03	1423.7	1838.99	1413.16	1486.54	1937.62	1540.16	1743.82	1644.7	1652.63	1500.54	1491.32	1531.91	1584.77	1492.46	1516.36
VIT_14s0128g00200	0	0	210.004	60.3464	0	0	0	0	59.8428	0	0	0	322.469	50.5531	60.1286	0	0	0
VIT_14s0128g00220	412.879	531.995	385.722	564.556	401.919	376.366	441.285	375.603	336.222	416.138	445.255	572.565	469.581	451.367	513.826	380.628	378.632	335.729
VIT_14s0128g00230	720.419	651.334	753.587	612.992	744.664	817.128	637.864	784.96	858.271	779.02	690.42	725.17	666.123	753.481	809.003	753.032	838.566	980.817
VIT_14s0128g00240	467.364	327.824	475.01	451.01	348.125	448.633	322.66	526.419	437.797	562.281	400.18	262.623	355.423	389.981	292.444	365.356	394.893	464.544
VIT_14s0128g00250	2329.56	3114.33	2674.34	2794.2	2658.97	2588.77	2598.23	2607.68	2503.16	2499.3	2512.12	2562.35	2736.28	2692.55	2704.42	2709.04	2472.73	2232.45
VIT_14s0128g00260	39.956	61.8264	48.5724	57.1703	49.9517	40.0693	69.1415	46.6811	42.5199	47.0632	48.3734	54.4173	51.7834	44.5348	49.1961	36.4181	34.8435	47.6715
VIT_14s0128g00270	29.0589	40.2591	30.7149	43.6717	55.3311	35.0607	37.2822	36.6267	38.5828	23.5316	59.3673	36.6725	31.7762	39.7203	39.6302	31.719	46.458	29.4144
VIT_14s0128g00280	35.1129	37.3834	30.0006	45.2598	30.7395	37.2072	33.8929	34.4722	28.3466	35.9166	34.0813	44.9534	50.6065	43.3312	35.5305	37.5929	42.9736	31.4429
VIT_14s0128g00290	60.5394	37.3834	57.8583	47.6419	37.6559	60.8195	74.5644	61.0445	48.8191	69.3563	56.0692	28.3916	60.0217	66.2004	39.6302	48.1659	46.458	59.843
VIT_14s0128g00310	215.52	215.674	252.148	234.239	248.99	219.666	208.78	277.932	262.993	222.931	235.271	180.997	213.018	268.413	326.608	237.305	228.806	262.701
VIT_14s0128g00320	131.976	189.793	166.432	161.982	144.476	133.803	168.787	108.444	133.071	147.382	148.418	164.435	148.289	126.383	157.154	136.274	131.244	128.815
VIT_14s0128g00330	387.452	396.839	360.007	370.019	331.218	374.934	345.03	296.604	346.458	300.957	381.49	292.197	373.076	338.224	359.405	323.064	340.305	349.929
VIT_14s0128g00340	12.1079	5.75129	38.5722	18.2627	9.22184	5.00867	1.35572	5.74536	44.0947	6.19252	7.69577	3.54896	97.6824	40.9239	24.5981	4.69911	5.80725	4.05715
VIT_14s0128g00350	0	0	14.286	3.17613	0	0.715524	0	0	18.8977	0	0	0	30.5993	8.42551	9.56591	0	2.3229	2.02858
VIT_14s0128g00360	4864.95	3440.71	4758.67	4107.52	4481.82	5707.02	4780.93	5686.47	5751.99	5049.38	4962.67	4220.89	5152.45	4550.98	4532.88	5085.61	5556.37	6186.14
VIT_14s0128g00370	4337.05	3866.31	3949.37	3557.26	3500.46	3770.09	3013.76	3741.67	3448.05	3892.62	4210.68	3020.16	3077.58	4068.32	2873.87	4166.93	3837.43	4661.67
VIT_14s0128g00380	2656.47	2908.72	2863.63	2676.68	2316.22	2486.45	2266.76	2582.54	2506.31	2366.78	2392.28	2367.15	2370.27	2577	2319.05	2489.35	2336.84	2763.93
VIT_14s0128g00390	3651.74	4461.57	3910.8	4550.59	3713.33	3561.16	3934.96	3960.71	3424.42	3905.01	3777.52	4675.16	3708.4	3551.95	3820.9	3513.76	3466.93	3780.25
VIT_14s0128g00400	1948.16	1804.47	2055.76	1607.12	1819.78	2066.43	1806.49	2155.95	2131.51	1870.14	1941.53	1586.38	1627.65	2006.48	1635.77	2147.49	2036.02	2252.73
VIT_14s0128g00430	64.1718	46.0104	80.716	67.4927	69.9323	78.7076	61.6851	96.2348	76.3783	71.8333	80.2559	60.3322	48.2527	87.866	71.0611	86.9335	92.9159	66.943
VIT_14s0128g00470	118.657	146.658	144.289	183.421	169.836	155.984	156.585	117.78	135.434	147.382	146.22	201.107	213.018	119.161	202.251	115.128	182.348	90.2716
VIT_14s0128g00480	2124.93	2629.78	2328.62	2127.21	2106.42	2200.24	2421.99	2282.34	2255.13	2021.24	2183.4	2069.04	2105.47	2591.45	2220.66	2215.63	2288.06	2406.91
VIT_14s0128g00490	123.5	152.409	118.574	192.156	102.977	145.251	132.182	101.98	109.449	101.557	135.226	180.997	154.173	125.179	157.154	118.652	137.051	131.857
VIT_14s0128g00500	26.6374	14.3782	18.5718	12.7045	16.1382	20.7502	14.9129	20.1088	7.87405	18.5776	16.4909	10.6469	9.41517	10.8328	13.6656	9.39822	17.4217	20.2858
VIT_14s0128g00510	71.4365	54.6373	85.0018	80.1972	109.894	111.622	73.2087	83.3077	96.0634	97.8419	91.2498	94.6388	87.0903	89.0697	109.325	88.1083	101.046	74.043
VIT_14s0128g00520	110.182	145.22	162.146	90.5196	144.476	72.9834	101.001	104.135	127.56	89.1724	127.53	108.835	111.805	73.4223	88.8263	138.624	162.603	79.1145
VIT_14s0128g00550	226.418	145.22	253.577	176.275	238.231	299.804	197.257	262.132	237.009	269.994	264.954	248.427	254.21	219.063	300.643	213.809	255.519	242.415
VIT_14s0128g00570	15.7403	5.75129	24.2862	15.8806	18.4437	35.7762	10.1679	5.02719	18.8977	61.9252	9.89456	31.9406	40.0145	27.6838	23.2315	14.0973	5.80725	20.2858
VIT_14s0128g00690	52.0639	27.3186	52.1439	61.1404	39.1928	45.078	42.0272	39.4994	44.8821	30.9626	49.4728	33.1236	37.6607	44.5348	28.6977	36.4181	34.8435	31.4429
VIT_14s0128g00700	46.01	67.5777	57.8583	32.5553	84.5336	70.1213	62.3629	93.3621	96.0634	59.4482	70.3613	46.1364	102.39	57.7749	75.1608	59.9136	76.6557	73.0287
VIT_14s0128g00710	777.326	625.453	821.446	697.16	788.468	830.008	620.24	843.85	892.13	798.836	812.453	894.337	894.441	720.983	768.006	791.8	830.436	865.188
VIT_14s0128g00720	1006.17	678.653	933.591	596.318	1029	1079.01	871.725	1195.04	1156.7	859.522	1163.16	1285.9	1149.83	1103.74	1307.8	1101.94	1337.99	1666.48
VIT_14s0128g00730	158.613	189.793	237.148	329.523	181.363	160.277	231.15	158.716	137.796	143.667	182.5	278.001	204.78	178.139	276.045	199.712	216.03	184.6
VIT_14s0128g00740	221.574	234.365	283.577	263.618	338.134	365.633	267.076	330.358	328.348	282.379	321.023	369.091	324.823	335.817	438.665	319.539	383.278	279.944
VIT_14s0128g00750	621.135	616.826	647.871	393.84	850.715	753.447	711.751	778.496	785.043	620.491	767.378	690.863	792.051	801.627	847.267	780.052	831.598	787.088
VIT_14s0128g00760	1141.77	1371.68	1310.03	1091.79	1348.69	1463.25	1234.38	1292.71	1325.2	1335.11	1465.49	1291.82	1369.91	1559.92	1197.11	1291.08	1314.76	1300.32
VIT_14s0128g00770	500.056	602.448	487.153	502.622	412.678	420.728	488.736	410.075	369.293	515.218	494.728	337.151	403.675	511.549	332.074	469.911	457.611	499.03
VIT_14s0128g00780	335.389	287.565	477.153	183.421	370.411	180.312	278.6	317.431	450.396	284.856	277.048	230.682	169.473	213.045	157.154	534.524	439.028	395.572
VIT_14s0128g00790	29.0589	38.8212	33.5721	6.35225	43.0353	8.58629	16.9464	25.136	19.6851	32.2011	32.9819	26.0257	16.4765	16.851	12.299	41.1172	31.3591	23.3286
VIT_14s0128g00800	15.7403	10.0648	12.1431	11.1164	19.2122	17.8881	22.3693	10.0544	20.4725	14.8621	12.0933	14.1958	23.5379	7.22187	13.6656	34.0685	9.29159	18.2572
VIT_14s0128g00810	376.555	242.992	274.291	169.923	371.948	339.874	265.042	458.911	399.214	308.388	360.602	114.75	244.794	493.494	203.617	426.444	419.283	477.73
VIT_14s0128g00820	37.5345	28.7565	32.8578	15.0866	47.6462	38.6383	39.3158	57.4536	55.1184	26.0086	20.8885	24.8427	21.1841	60.1822	45.0965	37.5929	36.0049	66.943
VIT_14s0128g00840	244.579	237.241	353.579	238.209	412.678	323.417	375.533	408.639	326.773	325.727	302.334	240.146	277.747	441.738	300.643	323.064	346.112	376.301
VIT_14s0128g00850	856.028	612.513	843.589	601.876	975.979	793.516	793.094	860.368	924.414	911.54	991.654	628.165	630.816	926.806	658.682	951.569	958.196	972.702
VIT_14s0128g00860	24.2158	11.5026	32.1435	19.0568	37.6559	25.7589	30.5036	36.6267	37.008	32.2011	26.3855	24.8427	29.4224	15.6474	25.9646	66.9623	33.682	45.643
VIT_14s0128g00880	65.3826	77.6425	77.8588	81.7852	56.868	75.8455	88.1215	58.89	82.6775	61.9252	80.2559	68.6131	72.9675	60.1822	71.0611	93.9822	81.3014	79.1145
VIT_14s0128g00890	5180.97	4412.68	5478.69	4329.85	4776.92	5918.81	5037.16	5710.89	5681.13	5382.54	5295.79	3953.54	4794.67	5424.83	4791.16	5273.57	5403.06	5983.29
VIT_14s0128g00900	900.827	602.448	815.017	471.655	942.165	938.052	675.146	964.502	1083.47	817.413	749.788	533.526	737.914	830.515	850	1005.61	1023.24	1158.32
VIT_14s0128g00910	15.7403	4.31347	8.57161	0	26.897	27.1899	12.8793	14.3634	32.2836	2.47701	16.4909	8.2809	22.361	19.2583	8.19935	21.146	15.0988	26.3715
VIT_14s0030g00010	248.212	221.425	260.72	204.066	251.295	299.089	229.116	346.876	332.285	272.471	234.171	203.473	235.379	239.525	198.151	281.946	312.43	352.972
VIT_14s0030g00020	64.1718	54.6373	57.144	73.8449	66.0899	60.8195	86.0879	53.1446	74.8035	56.9712	56.0692	46.1364	40.0145	56.5713	35.5305	61.0884	38.3278	43.6144
VIT_14s0030g00030	495.213	444.287	477.867	369.225	494.137	470.099	481.957	525.701	474.805	468.155	506.821	538.258	504.888	463.403	619.051	499.28	528.459	498.015
VIT_14s0030g00140	6.05394	10.0648	2.8572	0.794031	31.508	8.58629	16.2686	5.02719	3.93703	13.6236	8.79516	0	10.5921	8.42551	15.0322	11.7478	15.0988	9.12859
VIT_14s0030g00160	184.04	189.793	175.004	144.514	204.418	144.536	225.049	207.551	159.056	158.529	153.915	169.167	169.473	122.772	214.55	178.566	197.446	133.886
VIT_14s0030g00180	66.5934	30.1943	53.5725	53.2001	43.0353	67.9748	73.8865	89.7713	107.874	58.2097	61.5661	29.5746	75.3213	43.3312	66.9614	63.438	95.2388	80.1288
VIT_14s0030g00190	694.993	750.544	381.437	631.255	1032.85	598.178	610.072	507.746	392.915	978.419	651.941	1029.2	1186.31	429.701	1024.92	574.466	670.156	463.53
VIT_14s0030g00320	29.0589	102.085	47.8581	73.0509	45.3407	65.8282	37.96	27.2905	25.9844	54.4942	46.1746	59.1493	74.1444	37.313	65.5948	39.9424	38.3278	23.3286
VIT_14s0030g00330	4.84316	21.5674	15.7146	19.0568	0.768487	25.0433	7.45644	10.0544	11.8111	7.43103	14.2921	23.6597	21.1841	12.0364	24.5981	17.6217	11.6145	7.10002
VIT_14s0030g00340	144.084	87.7072	160.003	145.308	112.968	193.907	109.135	154.407	161.418	126.328	105.542	117.116	121.22	79.4405	140.756	142.148	113.822	157.215
VIT_14s0030g00400	5656.81	4345.1	5368.68	3999.54	5319.47	5414.37	4879.9	6010.37	5776.4	5204.2	5239.72	6169.27	5250.13	4934.94	5818.81	5621.31	5617.93	6323.07
VIT_14s0030g00410	21.7942	46.0104	33.5721	64.3165	52.2571	47.9401	56.9401	33.0358	47.2443	35.9166	31.8825	52.0513	37.6607	40.9239	43.7299	24.6703	40.6507	37.5287
VIT_14s0030g00440	3162.58	4224.33	3872.94	5196.94	2875.68	3589.78	3318.79	3347.39	3282.69	3804.69	3319.07	3850.62	3502.44	3279.93	2984.57	2926.37	2753.8	2915.06
VIT_14s0030g00450	536.379	631.205	598.584	638.401	357.346	431.461	505.682	447.42	460.632	512.741	478.237	576.114	389.553	604.23	537.058	479.309	473.871	437.158
VIT_14s0030g00460	19.3726	38.8212	25.0005	19.0568	35.3504	12.8794	24.4029	18.6724	15.7481	22.2931	23.0873	37.8555	11.769	20.462	21.8649	18.7964	18.5832	20.2858
VIT_14s0030g00470	27.8481	10.0648	12.8574	11.9105	12.2958	14.3105	27.7922	10.7726	16.5355	14.8621	7.69577	16.5618	15.2996	10.8328	32.7974	8.22344	12.7759	13.1857
VIT_14s0030g00480	1668.47	1547.1	1558.6	1320.47	1528.52	1606.35	1460.11	1707.09	1644.1	1745.05	1580.93	1521.32	1444.05	1645.38	1577.01	1589.47	1601.64	1704
VIT_14s0030g00490	150.138	209.922	177.147	196.126	187.511	178.165	143.706	165.179	166.93	167.198	200.09	215.303	180.065	162.492	217.283	180.916	170.733	132.872
VIT_14s0030g00500	324.491	373.834	300.721	291.41	386.549	306.244	337.573	287.268	268.505	267.517	294.638	539.441	529.603	268.413	568.489	263.15	377.471	328.629
VIT_14s0030g00520	16.951	5.75129	15.0003	11.9105	9.99033	2.14657	6.77858	12.2089	6.29924	11.1465	15.3915	4.73194	5.88448	13.2401	6.8328	14.0973	25.5519	6.08573
VIT_14s0030g00620	1936.05	1846.17	2180.05	1580.92	2009.59	2130.83	1483.15	2076.95	2125.99	1783.45	1970.12	1840.72	1805.36	2164.15	1873.55	1998.3	2120.81	2163.48
VIT_14s0030g00630	359.604	493.173	365.008	422.425	317.385	381.374	370.11	377.039	363.781	351.735	372.695	350.164	381.314	429.701	362.138	379.453	380.955	328.629
VIT_14s0030g00640	72.6473	28.7565	61.4299	57.1703	109.125	60.104	73.8865	71.0988	70.8665	53.2557	85.7528	57.9663	61.1986	62.5895	51.9292	75.1857	67.3641	48.6858
VIT_14s0030g00650	513.374	441.412	586.441	366.049	477.999	351.322	449.42	458.193	503.939	391.368	518.915	567.833	515.48	383.963	702.411	494.581	670.156	581.187
VIT_14s0030g00670	250.633	271.749	254.291	183.421	294.331	215.373	159.974	268.596	281.891	266.279	233.072	337.151	238.91	160.085	319.775	266.674	278.748	328.629
VIT_14s0030g00680	25.4266	7.18912	8.57161	11.1164	0.768487	13.595	8.13429	6.46353	14.9607	8.66953	9.89456	14.1958	18.8303	14.4437	8.19935	7.04866	25.5519	9.12859
VIT_14s0030g00690	247.001	244.43	377.865	337.463	295.868	323.417	214.881	388.53	323.623	215.5	362.8	233.048	202.426	381.555	280.145	298.393	358.888	297.186
VIT_14s0030g00700	943.204	1133	855.732	1066.38	806.911	792.085	931.377	758.388	659.058	880.577	957.573	928.643	948.578	943.657	796.704	780.052	735.197	663.344
VIT_14s0030g00710	2505.12	1709.57	2825.77	2024.78	3014.77	3667.77	2289.8	3367.5	3485.84	2615.72	2525.31	2662.9	2732.75	2314.61	3428.7	2869.98	3279.93	3806.62
VIT_14s0030g00720	196.148	152.409	179.289	116.723	143.707	118.777	109.135	145.789	144.883	157.29	161.611	87.5409	176.534	176.936	127.09	197.363	191.639	179.529
VIT_14s0030g00730	251.844	198.42	233.576	233.445	285.109	296.227	279.277	222.633	266.93	242.747	222.078	270.904	307.17	226.285	337.54	226.732	276.425	260.672
VIT_14s0030g00740	2313.82	3216.41	2069.33	2937.92	2040.33	1947.66	2205.75	2020.93	1823.63	2039.82	2088.85	2692.47	2092.52	2487.93	1846.22	1997.12	1831.61	1729.36
VIT_14s0030g00750	3804.3	4093.48	3970.08	4428.31	3389.03	4194.4	3671.96	3812.05	3848.84	3552.03	3699.46	4036.35	3846.1	3480.94	4187.14	3405.68	3662.05	3882.69
VIT_14s0030g00830	1472.32	2672.91	1570.03	2363.83	1698.36	1612.79	2096.61	1229.51	1324.42	1851.56	1797.51	2670	2174.9	1964.35	2346.38	1360.39	1551.7	1228.3
VIT_14s0030g00840	42.3776	61.8264	38.5722	29.3792	96.0609	57.2419	73.2087	50.9901	47.2443	60.6867	72.5601	78.077	102.39	56.5713	71.0611	83.4092	51.1038	65.9287
VIT_14s0030g00870	24.2158	20.1295	28.572	13.4985	73.0063	33.6296	28.47	22.9814	25.197	13.6236	36.28	5.91493	34.13	42.1276	23.2315	50.5154	25.5519	43.6144
VIT_14s0030g00920	32.6913	18.6917	41.4294	45.2598	33.8134	35.7762	50.8393	31.5995	25.197	21.0546	29.6837	39.0385	36.4838	22.8692	53.2958	27.0199	26.7133	23.3286
VIT_14s0030g00930	38.7452	28.7565	32.1435	30.1732	40.7298	33.6296	28.47	45.2447	43.3073	19.8161	16.4909	49.6854	48.2527	39.7203	38.2637	24.6703	49.9423	46.6573
VIT_14s0030g00950	726.473	1365.93	784.302	1335.56	965.22	928.034	1281.83	631.99	660.633	1044.06	976.263	1561.54	1213.38	1157.91	1259.97	761.255	752.619	591.33
VIT_14s0030g00960	148.927	184.041	205.719	147.69	205.186	218.95	184.377	166.615	211.812	206.83	223.177	136.043	169.473	217.86	191.318	236.13	192.801	191.7
VIT_14s0030g00980	18.1618	27.3186	15.7146	15.8806	9.99033	7.87076	20.3357	17.2361	14.9607	9.90804	6.59637	16.5618	14.1228	16.851	5.46624	10.573	23.229	9.12859
VIT_14s0030g00990	31.4805	43.1347	55.7154	34.9374	67.6269	55.8109	65.7522	47.3992	38.5828	30.9626	52.771	41.4045	65.9062	44.5348	54.6624	65.7875	56.911	32.4572
VIT_14s0030g01000	33.9021	21.5674	30.0006	16.6747	53.0256	47.2246	24.4029	46.6811	28.3466	32.2011	35.1806	23.6597	34.13	25.2765	51.9292	50.5154	61.5568	45.643
VIT_14s0030g01030	8.47552	8.62694	16.4289	17.4687	16.9067	12.1639	16.2686	18.6724	7.08665	12.385	12.0933	24.8427	18.8303	18.0547	17.7653	14.0973	20.9061	14.2
VIT_14s0030g01040	4.84316	7.18912	5.0001	10.3224	18.4437	14.3105	16.9464	15.0816	13.3859	11.1465	14.2921	7.09791	16.4765	15.6474	19.1318	22.3208	29.0362	16.2286
VIT_14s0030g01050	49.6423	34.5078	40.0008	23.0269	82.2281	51.5177	39.9936	63.9171	57.4806	35.9166	58.2679	29.5746	44.722	51.7567	72.4276	64.6127	60.3954	52.743
VIT_14s0030g01100	9.68631	14.3782	11.4288	15.8806	14.6013	11.4484	24.4029	16.5179	10.2363	17.3391	24.1867	22.4767	22.361	18.0547	10.9325	16.4469	11.6145	21.3
VIT_14s0030g01150	4.84316	17.2539	12.8574	19.0568	12.2958	15.026	13.5572	8.61804	11.8111	9.90804	17.5903	24.8427	9.41517	9.62916	24.5981	7.04866	8.13014	8.1143
VIT_14s0030g01160	75.0689	79.0803	97.1449	88.1375	137.559	158.846	122.692	99.8256	85.0397	133.759	130.828	111.201	150.643	116.754	155.788	162.119	140.535	113.6
VIT_14s0030g01170	18.1618	17.2539	10.0002	9.52838	30.7395	20.7502	19.6579	18.6724	24.4096	14.8621	13.1927	7.09791	27.0686	16.851	32.7974	23.4955	22.0675	22.3143
VIT_14s0030g01220	1945.74	3941.07	2160.76	3375.43	1561.57	1793.1	2074.92	1367.4	1492.13	1776.02	1477.59	5763.5	2939.89	1674.27	3704.74	1427.35	1629.51	1346.97
VIT_14s0030g01230	3627.52	6734.77	4245.09	4283.01	2841.1	2741.17	4277.28	2678.77	3066.16	3409.6	2689.12	6703.98	4209.76	2461.45	4500.08	2743.1	2987.25	2458.63
VIT_14s0030g01240	3387.79	2667.16	3332.93	2795.78	2627.46	2945.1	2957.49	2956.71	3145.68	2697.46	2727.6	3140.83	2624.48	2324.24	3074.76	2529.29	2943.11	3767.07
VIT_14s0030g01250	1502.59	1081.24	1342.89	1055.27	1682.99	1734.43	1317.08	1753.77	1916.54	1499.83	1566.64	1162.87	1614.7	1582.79	1551.04	1726.92	1716.62	1903.82
VIT_14s0030g01260	1934.84	2149.55	2191.47	1810.39	2176.36	2217.41	2003.07	2017.34	2309.46	2221.88	2271.35	2092.7	2213.74	2091.93	2194.69	2012.39	2250.89	2120.88
VIT_14s0030g01270	3614.2	3403.33	3539.36	2916.48	3357.52	3444.53	3752.62	3191.55	3193.71	3713.04	3697.27	2696.02	3183.5	4401.73	3179.98	3635.93	3566.81	3633.18
VIT_14s0030g01280	612.659	665.712	732.158	647.93	811.522	774.197	631.764	777.778	692.129	658.885	797.062	618.701	652	802.831	638.183	716.614	635.313	627.844
VIT_14s0030g01300	15.7403	24.443	16.4289	43.6717	24.5916	36.4917	34.5708	25.136	14.9607	12.385	28.5843	9.46388	43.5451	36.1093	34.164	16.4469	15.0988	9.12859
VIT_14s0030g01340	117.447	77.6425	111.431	65.1106	162.151	153.122	107.102	147.225	145.67	107.75	177.003	167.984	163.589	144.437	189.952	132.75	189.316	177.5
VIT_14s0030g01350	2637.1	2133.73	2725.06	1547.57	2966.36	3156.89	2333.19	2897.1	3338.6	2583.52	2628.65	2435.77	3028.15	2539.69	2929.9	2824.16	3010.48	3138.21
VIT_14s0030g01360	15.7403	21.5674	25.0005	27.7911	15.3697	30.052	22.3693	23.6996	17.3229	28.4856	21.9879	18.9278	20.0072	22.8692	19.1318	22.3208	24.3904	19.2715
VIT_14s0030g01370	168.3	192.668	148.575	145.308	168.299	173.872	199.29	148.661	143.308	170.914	161.611	123.03	161.235	184.158	132.556	135.099	139.374	151.129
VIT_14s0030g01400	27.8481	35.9456	42.1437	46.8479	33.0449	40.0693	33.215	28.0086	34.6458	30.9626	49.4728	33.1236	28.2455	42.1276	35.5305	38.7676	37.1664	32.4572
VIT_14s0030g01430	43.5884	21.5674	44.2866	34.9374	42.2668	18.6036	39.9936	32.3177	35.4332	19.8161	40.6776	16.5618	17.6534	52.9604	23.2315	43.4667	30.1977	40.5715
VIT_14s0030g01440	4337.05	3330	4659.38	3380.99	4510.25	5047.3	4014.95	5834.41	5726.01	4484.63	4359.1	3869.54	3913.18	5250.3	4064.15	5126.73	4734.07	5948.8
VIT_14s0030g01470	0	1.43782	16.4289	8.73435	0	0	0	0	3.14962	0	0	1.18299	60.0217	13.2401	27.3312	0	0	0
VIT_14s0030g01480	479.472	549.249	529.297	498.652	478.767	520.901	576.857	539.346	571.656	572.189	544.201	512.233	481.35	517.567	468.73	530.999	541.235	589.301
VIT_14s0030g01490	61.7502	43.1347	65.7157	28.5851	42.2668	52.9488	33.8929	45.9629	69.2916	44.5862	42.8764	30.7576	25.8917	38.5166	42.3633	50.5154	73.1713	74.043
VIT_14s0030g01500	29.0589	28.7565	40.0008	50.818	23.8231	32.1986	39.3158	25.8541	26.7718	27.2471	30.7831	53.2343	35.3069	25.2765	31.4309	14.0973	33.682	22.3143
VIT_14s0030g01520	64.1718	48.886	80.0017	46.0538	68.3953	33.6296	64.3965	51.7082	44.0947	37.1551	57.1686	37.8555	23.5379	52.9604	57.3955	50.5154	51.1038	55.7858
VIT_14s0030g01530	1156.3	734.728	1072.17	862.318	1309.5	1493.3	931.377	1365.96	1548.83	1117.13	1187.35	1153.41	1291.05	1186.79	1589.31	1361.57	1542.4	1736.46
VIT_14s0030g01540	301.486	381.023	337.864	395.428	305.089	334.865	376.889	307.377	292.127	372.79	378.192	236.597	331.885	353.871	270.579	394.725	315.914	338.772
VIT_14s0030g01560	4488.39	5368.83	4564.38	4519.63	3887.01	4104.24	4746.36	4042.58	4111.04	4737.28	3713.76	4762.7	3969.67	4093.59	4588.91	4310.26	3925.7	3920.22
VIT_14s0030g01570	87.1768	86.2694	87.859	49.23	94.5239	86.5784	65.0744	63.9171	88.1894	61.9252	90.1504	70.9791	107.098	89.0697	103.858	63.438	89.4316	62.8859
VIT_14s0030g01580	1566.76	1246.59	1658.61	1382.41	1764.45	2049.98	1252.68	2022.37	2013.39	1569.19	1657.89	1766.2	1700.61	1797.04	2089.47	1831.48	1989.56	2017.42
VIT_14s0030g01590	131.976	212.798	174.289	182.627	152.929	157.415	133.538	107.726	103.937	148.621	131.927	406.947	247.148	92.6806	351.206	84.5839	126.598	103.457
VIT_14s0030g01600	7624.34	8972.02	10262.4	9602.22	7007.83	7524.45	8449.5	8312.1	8198.46	7972.26	7345.06	8816.79	7167.3	7697.31	7809.89	7695.96	7649.3	9238.14
VIT_14s0030g01610	1897.31	1754.14	1950.75	2313.01	1885.87	1692.21	2251.17	2016.62	1796.86	1824.32	1981.11	2192.07	1579.39	1895.74	1827.09	1917.24	1648.1	1893.68
VIT_14s0030g01620	2352.56	3105.7	2354.33	2463.09	2046.48	1934.78	2180.67	2033.14	1838.59	2276.37	2328.52	2538.69	2464.42	2323.03	2353.21	2241.47	2137.07	1872.38
VIT_14s0030g01650	1038.86	858.381	943.591	751.948	855.326	852.904	707.684	736.124	740.948	755.488	930.088	786.685	780.282	816.071	787.138	794.149	893.154	882.431
VIT_14s0030g01660	4303.14	4429.93	4289.38	5201.7	3857.04	5037.29	4564.02	3796.25	4082.7	4209.68	4206.29	5903.1	5185.4	3880.55	5222.99	3859.14	4263.68	4497.35
VIT_14s0030g01670	3057.24	3751.28	3598.65	3963.81	2891.82	3682.09	3306.59	3432.14	3050.41	3419.51	3368.55	4427.91	3690.75	3762.59	3897.43	3089.66	3118.49	3071.26
VIT_14s0030g01680	4326.15	5227.93	4269.37	4587.12	4335.8	4793.29	5155.11	4261.62	4443.33	4249.31	4257.96	5354.19	4894.71	4055.08	5354.18	3950.77	4720.13	4368.54
VIT_14s0030g01700	15.7403	24.443	17.1432	19.8508	30.7395	27.1899	11.5236	20.1088	12.5985	19.8161	23.0873	39.0385	41.1914	21.6656	38.2637	17.6217	20.9061	16.2286
VIT_14s0030g01710	123.5	135.155	161.432	161.982	174.447	204.64	135.572	134.298	147.245	174.629	148.418	198.741	208.311	91.477	276.045	126.876	176.54	135.915
VIT_14s0030g01720	1791.97	1899.36	1727.18	1639.67	1453.21	1715.83	1617.37	1635.27	1609.46	1984.08	1886.56	1571	1818.3	1651.4	1452.65	1638.81	1536.6	1526.5
VIT_14s0030g01730	274.849	378.148	428.58	532.001	311.237	371.357	404.681	298.041	331.498	302.195	355.105	377.372	323.646	343.039	362.138	263.15	304.3	291.101
VIT_14s0030g01740	1163.57	1606.05	1490.03	1364.15	1263.39	1739.44	1083.22	1233.82	1591.35	1179.06	1198.34	1611.23	1580.57	1330.03	1686.33	1197.1	1437.87	1315.53
VIT_14s0030g01760	49.6423	80.5181	45.7152	59.5524	54.5626	66.5437	61.0072	52.4264	51.1813	54.4942	39.5782	31.9406	45.8989	69.8114	46.463	48.1659	27.8748	43.6144
VIT_14s0030g01800	520.639	450.039	562.155	558.998	531.793	638.247	524.662	511.337	644.885	583.336	595.872	621.067	562.556	519.974	632.717	616.758	624.86	717.102
VIT_14s0030g01810	7310.74	9770.01	7028	8408	5973.45	6270.85	7291.72	6055.61	5722.86	7676.25	6723.9	7508.41	6782.45	7605.83	6261.57	6495.34	6549.41	6590.84
VIT_14s0030g01820	2570.5	2848.33	2615.05	2665.56	2308.54	2412.03	2079.67	2485.59	2746.47	2325.91	2435.16	2510.29	2394.98	2743.11	2634.73	2619.75	2734.05	2848.12
VIT_14s0030g01830	1438.42	1665	1331.46	1421.32	1343.32	1339.46	1437.74	1289.12	1257.49	1436.67	1520.46	1498.84	1468.77	1454	1380.22	1231.17	1343.8	1326.69
VIT_14s0030g01840	62.961	30.1943	71.4301	23.8209	63.0159	63.6816	46.7722	76.8442	83.4649	73.0718	65.9637	41.4045	41.1914	74.626	76.5273	86.9335	65.0412	63.9001
VIT_14s0030g01850	194.937	192.668	194.29	204.066	191.353	237.554	198.612	247.769	255.119	237.793	236.37	192.827	207.134	227.489	206.35	253.752	239.259	217.058
VIT_14s0030g01860	2750.91	4041.72	2892.92	2644.12	3966.16	3379.42	2409.78	2900.69	2738.59	3095.02	3729.15	3341.93	4188.57	3443.63	3383.6	2862.93	3055.77	2540.79
VIT_14s0030g01880	24.2158	51.7616	23.5719	13.4985	19.9807	29.3365	23.0472	22.2633	16.5355	22.2931	46.1746	29.5746	38.8376	33.702	31.4309	12.9225	18.5832	13.1857
VIT_14s0030g01890	52.0639	115.026	45.0009	18.2627	39.1928	10.7329	16.9464	12.2089	23.6222	42.1092	13.1927	7.09791	10.5921	15.6474	12.299	24.6703	52.2652	23.3286
VIT_14s0030g01900	375.345	498.925	467.867	405.75	466.472	388.529	429.762	390.685	398.427	448.339	441.957	541.807	603.748	423.683	537.058	417.046	420.445	353.987
VIT_14s0030g01910	835.444	936.023	803.588	1226.78	781.551	822.852	968.659	705.961	735.436	777.781	859.727	953.486	796.759	788.387	855.466	714.264	717.776	751.587
VIT_14s0030g01930	639.297	971.969	760.73	684.455	808.448	1042.52	841.222	783.524	851.972	813.698	756.384	1028.01	1158.07	665.615	1119.21	755.382	958.196	716.087
VIT_14s0030g01950	148.927	199.857	137.146	185.009	530.256	153.838	216.237	176.67	119.686	227.885	220.978	533.526	313.054	176.936	401.768	152.721	204.415	111.572
VIT_14s0030g01960	266.374	309.132	225.005	262.03	204.418	208.933	257.586	210.424	214.962	255.132	238.569	201.107	189.48	276.838	230.948	225.557	200.931	178.515
VIT_14s0030g01970	18.1618	10.0648	12.8574	14.2926	19.9807	11.4484	19.6579	18.6724	25.197	26.0086	9.89456	15.3788	16.4765	12.0364	17.7653	25.8451	11.6145	9.12859
VIT_14s0030g01980	1024.33	1309.86	947.877	804.354	1107.39	739.852	1078.47	830.923	851.185	1030.44	904.802	954.669	729.675	966.526	956.591	1207.67	1116.15	843.888
VIT_14s0030g02020	308.751	369.521	360.722	391.458	421.131	256.158	450.098	442.393	355.12	500.356	428.764	263.806	264.802	418.868	343.006	406.473	383.278	397.601
VIT_14s0030g02090	83.5444	43.1347	77.1445	77.8151	75.3117	94.4491	68.4636	84.0259	82.6775	94.1264	103.343	55.6003	52.9603	83.0515	62.8617	108.079	63.8797	113.6
VIT_14s0030g02110	16.951	43.1347	29.2863	11.9105	13.0643	30.7675	27.1143	30.1631	24.4096	29.7241	20.8885	9.46388	40.0145	19.2583	15.0322	25.8451	16.2603	20.2858
VIT_14s0030g02170	2253.28	2290.45	1910.04	1869.94	1835.92	1764.48	1984.09	1817.69	1771.66	1911.01	1838.19	1717.69	1722.98	1946.29	1678.13	1911.36	1802.57	1984.96
VIT_14s0030g02180	1011.01	1683.69	867.161	1033.03	1161.95	797.809	1027.63	842.414	787.405	1015.57	964.17	1492.93	1327.54	974.952	1372.03	910.452	1062.73	681.602
VIT_14s0030g02190	502.477	372.396	444.295	356.52	572.523	556.678	620.918	589.618	572.443	476.824	557.393	391.568	491.942	503.123	500.161	607.36	570.272	623.787
VIT_14s0030g02200	4826.2	2628.34	4479.38	4627.62	3807.85	4975.04	3509.27	5213.2	4019.7	4484.63	4006.2	6274.55	3907.29	3367.8	6441.96	3236.51	3786.32	5667.84
VIT_14s0030g02210	64.1718	38.8212	44.2866	58.7583	54.5626	57.2419	44.7386	55.2991	45.6695	73.0718	36.28	76.894	42.3683	33.702	49.1961	39.9424	22.0675	53.7573
VIT_14s0030g02220	988.004	902.953	908.59	934.575	684.722	910.862	629.052	810.096	863.783	775.304	715.706	936.924	940.34	658.394	821.302	689.594	811.853	848.959
VIT_14s0030g02230	2748.49	2987.8	2960.06	2559.96	2531.4	2729.01	2384.7	2999.8	2777.18	2660.31	2733.1	2205.08	2411.46	3030.78	2272.59	2913.45	2497.12	2911.01
VIT_14s0030g02240	159.824	208.484	180.718	193.744	184.437	200.347	199.29	183.852	191.339	169.675	201.189	153.788	194.188	139.623	143.489	213.809	209.061	193.729
VIT_14s0030g02260	54.4855	40.2591	52.1439	33.3493	51.4886	49.3711	39.9936	48.1174	55.1184	44.5862	50.5722	46.1364	67.0831	64.9968	45.0965	51.6902	63.8797	54.7716
VIT_14s0030g02280	38.7452	54.6373	58.5726	33.3493	43.0353	54.3798	45.4165	40.9357	43.3073	47.0632	50.5722	33.1236	62.3755	55.3676	24.5981	55.2145	54.5881	52.743
VIT_14s0030g02290	52.0639	31.6321	28.572	34.1434	27.6655	25.7589	26.4365	38.7812	25.197	23.5316	30.7831	36.6725	34.13	26.4802	12.299	22.3208	36.0049	30.4286
VIT_14s0030g02300	2542.66	1853.35	2530.05	1569.8	2781.92	2761.21	2416.56	3156.36	3008.67	2802.74	2741.89	2137.65	2431.47	2815.32	2334.08	2989.81	3010.48	3191.96
VIT_14s0030g02310	118.657	104.961	44.2866	78.6091	128.337	70.1213	172.854	56.7354	79.5279	70.5948	138.524	134.86	132.989	150.456	87.4598	85.7587	87.1087	49.7001
VIT_14s0081g00010	354.761	799.43	315.721	671.751	812.291	547.376	858.168	387.094	364.569	662.6	682.724	739.366	1043.91	588.582	612.218	507.504	409.992	274.872
VIT_14s0081g00020	56.9071	314.883	65.0014	45.2598	73.0063	33.6296	75.9201	49.5537	45.6695	42.1092	54.9698	179.814	118.866	72.2187	169.453	65.7875	63.8797	28.4001
VIT_14s0081g00030	1330.66	6913.06	1818.61	2059.72	2677.41	1331.59	2580.6	1620.19	1462.21	1408.18	1632.6	6017.85	4067.35	2320.63	5162.86	1624.72	1838.57	832.731
VIT_14s0081g00060	23.005	31.6321	15.7146	19.0568	11.5273	20.7502	15.5907	18.6724	24.4096	12.385	15.3915	23.6597	35.3069	6.01822	36.8971	8.22344	8.13014	16.2286
VIT_14s0081g00070	362.026	345.078	285.72	286.645	464.166	296.942	319.949	297.322	275.592	357.928	362.8	417.594	413.09	331.002	411.334	346.559	364.695	262.701
VIT_14s0081g00080	595.708	820.997	686.443	694.778	625.548	587.445	761.912	534.319	574.806	740.626	686.023	671.936	652	642.746	666.881	724.837	703.838	581.187
VIT_14s0081g00090	536.379	585.194	686.443	624.109	513.349	553.815	555.166	565.918	577.168	584.574	567.288	515.781	447.22	546.455	453.698	548.621	501.746	581.187
VIT_14s0081g00110	29.0589	21.5674	15.0003	17.4687	16.1382	20.0347	19.6579	22.9814	22.8347	14.8621	18.6897	23.6597	16.4765	21.6656	21.8649	16.4469	23.229	19.2715
VIT_14s0081g00120	18.1618	30.1943	24.2862	26.203	26.897	27.9054	24.4029	25.8541	33.8584	19.8161	18.6897	27.2087	27.0686	16.851	10.9325	14.0973	15.0988	33.4715
VIT_14s0081g00140	31.4805	25.8808	32.1435	14.2926	23.8231	21.4657	29.8257	27.2905	30.7088	22.2931	28.5843	15.3788	25.8917	24.0729	16.3987	21.146	38.3278	20.2858
VIT_14s0081g00150	846.341	708.847	798.588	653.488	704.703	808.542	823.597	758.388	830.712	772.827	736.595	481.475	697.899	704.132	578.055	794.149	644.604	734.345
VIT_14s0081g00160	93.2307	60.3886	67.1443	55.5822	84.5336	72.9834	73.2087	96.953	85.8271	79.2643	59.3673	72.1621	87.0903	74.626	95.6591	75.1857	92.9159	83.1716
VIT_14s0081g00200	61.7502	96.3342	68.5729	80.1972	103.746	62.9661	107.102	94.7985	57.4806	104.034	79.1565	110.018	98.8593	68.6077	69.6945	74.0109	87.1087	66.943
VIT_14s0081g00240	692.571	658.523	718.586	474.037	688.564	688.334	639.898	676.516	683.468	668.793	620.059	683.765	723.791	838.94	739.308	643.778	710.807	675.516
VIT_14s0081g00270	24.2158	18.6917	27.1434	23.0269	33.0449	15.7415	22.3693	25.136	26.7718	33.4396	26.3855	18.9278	24.7148	19.2583	16.3987	9.39822	23.229	30.4286
VIT_14s0081g00280	27.8481	11.5026	37.8579	17.4687	30.7395	29.3365	31.8593	29.445	45.6695	52.0172	28.5843	16.5618	21.1841	33.702	20.4984	37.5929	38.3278	45.643
VIT_14s0081g00320	1939.68	1445.01	1951.47	1727.02	1831.3	2205.24	2236.93	2187.55	2555.13	2064.59	1828.29	1942.46	1872.44	1598.44	2010.21	1857.32	1979.11	2115.8
VIT_14s0081g00330	128.344	143.782	120.717	119.105	204.418	151.691	163.364	128.552	168.505	136.236	158.313	183.363	224.787	149.252	168.087	152.721	161.441	138.957
VIT_14s0081g00440	6907.55	7784.38	7250.87	6917.6	7385.93	7127.33	6933.13	7077.57	6884.28	6983.93	7546.25	8090.43	7099.04	7022.06	7143	6803.13	7473.93	6859.63
VIT_14s0081g00460	2643.15	1958.32	2479.34	1773.07	2901.81	3109.67	2277.6	3327.28	3318.91	2634.3	2504.42	2384.9	2664.49	2707	2917.6	3027.4	3188.18	3690.99
VIT_14s0081g00480	1617.61	1752.71	1465.03	1788.95	1619.97	1559.84	1515.01	1348.01	1469.3	1737.62	1525.96	1789.86	1807.71	1232.53	1495.02	1675.23	1442.52	1443.33
VIT_14s0081g00490	290.589	316.321	337.15	339.845	416.52	409.28	374.855	395.712	395.277	310.865	378.192	417.594	361.307	365.908	381.27	307.792	399.539	329.644
VIT_14s0081g00500	3547.61	5807.37	4141.51	4984.93	3857.8	4254.5	5041.23	3274.86	3768.52	4667.93	4582.28	4205.51	4520.46	4460.71	4288.26	3894.39	4608.63	3597.68
VIT_14s0081g00540	55.6963	54.6373	46.4295	45.2598	28.434	42.2159	35.2486	38.7812	27.5592	37.1551	47.274	44.9534	27.0686	60.1822	20.4984	39.9424	34.8435	46.6573
VIT_14s0081g00560	117.447	175.414	150.717	198.508	137.559	150.26	155.907	120.653	148.82	157.29	122.033	127.762	130.635	120.364	188.585	130.4	146.343	104.472
VIT_14s0081g00580	194.937	185.479	215.004	210.418	148.318	189.614	181.666	177.388	203.15	198.161	161.611	138.409	184.773	202.212	165.354	219.683	221.837	217.058
VIT_14s0081g00600	150.138	178.29	142.146	139.75	119.884	133.803	126.759	120.653	126.772	118.896	126.43	144.324	141.228	162.492	161.254	133.925	135.89	102.443
VIT_14s0081g00620	395.928	609.637	512.154	474.037	593.272	650.411	528.729	502.001	581.892	553.612	542.002	771.306	615.517	613.859	721.543	523.951	688.739	608.573
VIT_14s0081g00630	2359.83	2812.38	2414.34	2563.93	2847.24	2944.38	2621.95	2513.6	2664.58	2805.21	2730.9	2843.9	2857.5	2811.71	3047.43	2559.84	2861.81	2633.09
VIT_14s0081g00650	61.7502	50.3238	47.1438	38.1135	63.0159	52.9488	44.0608	56.7354	74.0161	49.5402	48.3734	39.0385	45.8989	66.2004	56.0289	61.0884	61.5568	60.8573
VIT_14s0081g00660	151.349	129.404	155.003	164.365	118.347	154.553	179.632	129.271	139.371	136.236	142.921	132.494	105.921	181.75	122.99	122.177	117.306	143.015
VIT_14s0081g00670	19.3726	17.2539	31.4292	17.4687	20.7492	20.0347	25.7586	23.6996	25.197	12.385	18.6897	24.8427	21.1841	26.4802	30.0643	16.4469	19.7446	13.1857
VIT_14s0081g00680	370.501	455.79	382.151	358.902	355.041	384.236	403.325	344.722	407.876	367.836	392.484	293.38	369.545	333.41	317.042	385.327	399.539	419.915
VIT_14s0081g00690	35.1129	54.6373	35.0007	77.8151	38.4244	56.5264	52.1951	45.9629	55.9058	34.6781	41.777	67.4301	50.6065	52.9604	49.1961	43.4667	53.4267	38.5429
VIT_14s0081g00700	716.787	668.588	655.014	640.783	492.6	516.608	661.589	585.309	552.758	662.6	656.339	332.419	396.614	745.056	382.637	619.107	522.652	602.487
VIT_14s0081g00710	340.232	439.974	430.723	308.084	628.622	419.297	395.191	420.13	437.797	428.523	369.397	690.863	726.145	374.333	791.238	327.763	595.823	294.144
VIT_14s0081g00720	7.26473	25.8808	5.7144	23.0269	19.2122	15.026	14.9129	11.4907	8.66146	16.1006	16.4909	62.6982	28.2455	7.22187	36.8971	10.573	6.9687	5.07144
VIT_14s0081g00730	9.68631	12.9404	15.0003	7.14628	23.8231	10.7329	29.1479	19.3906	24.4096	13.6236	21.9879	15.3788	18.8303	15.6474	5.46624	22.3208	39.4893	13.1857
VIT_14s0081g00760	260.32	230.052	239.291	244.562	240.536	289.072	248.774	196.779	221.261	235.316	262.755	251.976	243.617	185.361	254.18	246.703	248.55	271.829
VIT_14s0036g00050	612.659	1084.12	775.73	773.387	708.545	595.316	753.778	532.164	530.711	693.563	688.221	695.595	723.791	634.321	699.678	628.506	554.011	504.101
VIT_14s0036g00070	13.3187	17.2539	29.2863	14.2926	8.45336	15.7415	6.77858	26.5723	5.51184	6.19252	14.2921	9.46388	9.41517	8.42551	9.56591	23.4955	12.7759	20.2858
VIT_14s0036g00110	13.3187	25.8808	21.429	40.4956	17.6752	17.1726	35.9265	17.2361	10.2363	24.7701	25.2861	39.0385	25.8917	27.6838	31.4309	14.0973	20.9061	13.1857
VIT_14s0036g00240	24.2158	15.8161	17.8575	10.3224	26.897	34.3451	16.9464	25.136	22.8347	30.9626	25.2861	11.8299	12.9459	32.4984	25.9646	36.4181	26.7133	37.5287
VIT_14s0036g00330	54.4855	43.1347	66.43	17.4687	76.0802	65.8282	50.8393	86.8986	81.8901	60.6867	49.4728	27.2087	45.8989	80.6442	50.5627	111.604	58.0725	103.457
VIT_14s0036g00340	29.0589	60.3886	45.7152	88.1375	38.4244	40.7849	63.7186	37.3448	38.5828	34.6781	24.1867	54.4173	34.13	26.4802	36.8971	50.5154	40.6507	28.4001
VIT_14s0036g00370	714.365	941.774	795.017	797.208	909.12	847.896	869.692	795.014	750.397	740.626	845.435	899.069	954.463	714.965	919.694	866.985	775.848	820.559
VIT_14s0036g00420	463.732	726.101	254.291	380.341	306.626	213.942	249.452	298.759	154.331	473.109	375.993	346.615	371.899	375.537	239.148	327.763	277.586	273.858
VIT_14s0036g00430	1823.45	1585.92	2242.19	1860.42	1931.21	2303.27	1631.6	2153.07	2298.44	1951.88	2045.97	1671.56	1913.63	2024.53	2130.47	2059.38	2174.23	2321.71
VIT_14s0036g00470	152.559	156.723	107.859	164.365	102.977	133.087	103.712	108.444	128.347	139.951	139.623	97.0048	121.22	108.328	114.791	118.652	137.051	96.3574
VIT_14s0036g00480	79.9121	69.0155	87.1447	72.2569	93.7554	105.182	86.7658	78.2805	100.788	63.1638	102.244	102.92	84.7365	79.4405	81.9935	86.9335	76.6557	72.0145
VIT_14s0036g00500	135.608	99.2098	70.7158	19.8508	146.781	129.51	68.4636	175.234	156.694	105.273	111.039	62.6982	142.404	113.143	127.09	165.644	162.603	181.558
VIT_14s0036g00510	2114.04	1626.18	2029.33	1426.87	2233.22	2439.22	2031.54	2433.88	2371.66	2374.21	2291.14	1802.87	2125.47	2274.89	2018.41	2525.77	2414.65	2738.58
VIT_14s0036g00520	3428.95	2204.18	3205.78	2916.48	2854.16	2711.84	3598.75	2899.97	2734.66	3017	3346.56	3137.28	2861.03	2396.46	3196.38	3018	2815.35	3934.42
VIT_14s0036g00540	3.63237	14.3782	10.0002	17.4687	17.6752	17.1726	12.8793	7.89987	12.5985	11.1465	9.89456	26.0257	21.1841	3.61093	20.4984	19.9712	18.5832	8.1143
VIT_14s0036g00570	4053.72	2271.76	3714.36	2008.11	4187.49	4363.26	3438.77	4200.58	4624.43	3483.91	3455.4	3253.21	4187.4	3012.72	4367.52	3967.22	4183.54	4610.95
VIT_14s0036g00630	544.855	639.831	577.869	657.458	639.381	549.522	749.711	596.081	595.278	577.143	590.375	539.441	654.354	563.306	486.495	573.291	572.594	543.658
VIT_14s0036g00660	734.949	530.557	615.013	560.586	753.886	699.067	755.812	801.478	910.24	662.6	771.775	570.199	647.293	952.083	588.987	881.083	829.275	936.188
VIT_14s0036g00680	154.981	179.728	204.29	163.57	195.964	184.605	166.753	165.897	151.182	206.83	189.096	162.069	202.426	175.732	207.717	189.139	233.451	231.258
VIT_14s0036g00690	220.364	230.052	225.005	188.185	207.492	204.64	202.002	197.497	217.324	187.014	192.394	208.205	214.195	190.176	266.479	214.984	224.16	238.358
VIT_14s0036g00700	669.566	556.438	573.583	354.932	475.693	485.841	439.252	560.891	551.184	484.255	509.02	304.027	344.83	533.214	370.338	511.028	528.459	717.102
VIT_14s0036g00730	593.287	353.705	567.869	286.645	499.517	689.765	498.903	665.744	712.602	541.227	562.89	453.083	570.795	657.19	547.99	565.068	620.214	645.087
VIT_14s0036g00750	2023.23	1860.54	2501.48	2311.43	1852.82	2374.11	2340.64	2311.79	2355.13	2309.81	2148.22	2118.73	2081.93	2199.06	2155.06	2057.03	2101.06	2448.49
VIT_14s0036g00810	159.824	129.404	177.147	123.075	188.279	206.071	168.787	173.797	144.095	168.437	196.792	190.461	224.787	205.823	181.752	178.566	193.962	210.972
VIT_14s0036g00840	65.3826	54.6373	43.5723	26.9971	68.3953	59.3885	35.2486	63.9171	60.6302	60.6867	41.777	54.4173	67.0831	52.9604	64.2283	58.7388	51.1038	68.9716
VIT_14s0036g00850	263.952	365.207	265.72	244.562	256.675	269.037	275.888	276.495	262.993	240.27	258.358	299.295	318.939	285.264	303.376	250.227	311.268	259.658
VIT_14s0036g00920	1358.51	1084.12	1523.6	1503.1	1349.46	1658.58	1028.99	1692.73	1516.54	1278.14	1281.89	1698.77	1439.34	1265.03	1642.6	1191.22	1634.16	1859.19
VIT_14s0036g00930	24243.6	24549.4	25168.4	30216.1	26517.4	25449	27641.7	26170.8	24881.2	28616.9	27878.5	32833.8	26161.2	24224.5	26229.7	25466.8	23391.6	26655.5
VIT_14s0036g00940	889.93	964.78	907.162	890.109	889.908	846.465	843.255	925.721	873.232	858.284	894.908	684.948	757.921	960.508	789.871	868.16	853.665	1032.55
VIT_14s0036g00970	286.957	401.153	347.864	377.959	295.099	309.822	418.238	312.404	359.844	299.718	375.993	272.087	297.755	447.756	278.778	311.316	337.982	374.272
VIT_14s0036g00980	455.257	595.259	481.439	566.938	436.501	492.28	438.574	418.693	459.845	547.419	498.026	493.305	446.044	564.509	467.363	438.192	458.772	472.658
VIT_14s0036g01020	18481.5	20684.5	19286.1	23460.5	20016	17090.3	22989.5	19611.1	18539.5	21509.1	21990.1	22188.1	17904.1	20263.4	16688.4	19032.6	17506.5	19743.1
VIT_14s0036g01030	3100.83	3503.98	3693.65	3280.94	4112.94	4260.94	3533.67	3942.04	4088.21	4007.8	3750.04	4256.38	4000.27	3736.11	4465.92	3880.29	4011.65	4031.8
VIT_14s0036g01060	21.7942	37.3834	17.8575	34.9374	38.4244	33.6296	37.96	30.1631	26.7718	24.7701	28.5843	37.8555	61.1986	27.6838	75.1608	51.6902	46.458	8.1143
VIT_14s0036g01130	680.463	831.062	724.301	780.533	776.94	959.517	784.282	807.941	914.177	753.011	773.974	876.592	1022.72	748.667	968.89	706.041	824.629	757.673
VIT_14s0036g01170	104.128	97.772	133.574	107.988	126.032	129.51	125.404	134.298	122.835	101.557	131.927	74.5281	103.567	154.066	129.823	106.905	130.082	100.415
VIT_14s0036g01380	558.174	465.855	653.585	663.81	481.841	768.473	480.601	625.526	721.263	626.684	540.902	727.536	609.632	451.367	828.135	508.678	616.73	643.059
VIT_14s0036g01400	26.6374	20.1295	26.4291	20.6448	43.0353	28.621	23.0472	24.4178	25.197	30.9626	15.3915	43.7704	21.1841	8.42551	31.4309	21.146	26.7133	20.2858
VIT_14s0036g01450	842.709	967.655	1057.16	1105.29	1009.02	1456.09	900.873	1002.57	1093.71	975.942	969.667	1786.31	1475.83	863.013	2058.04	858.762	1216.04	1015.3
VIT_14s0036g01460	2026.86	1508.28	2214.33	1440.37	2453.78	2764.78	2034.93	2719.71	2827.57	2142.61	2193.29	2238.21	2322.02	2349.51	2886.17	2659.7	2997.7	2923.18
VIT_14s0036g01520	306.33	263.122	269.291	316.819	226.704	248.287	241.995	272.186	281.891	299.718	291.34	222.401	260.094	243.136	247.347	301.918	269.456	295.158
VIT_14s0006g00060	50.8531	54.6373	62.8585	51.612	43.8038	56.5264	62.3629	45.9629	62.9924	55.7327	48.3734	63.8812	45.8989	52.9604	58.762	51.6902	44.1351	82.1573
VIT_14s0006g00070	180.408	253.057	216.433	187.391	188.279	201.778	180.988	186.724	200.001	152.336	197.891	262.623	183.596	215.452	209.084	206.761	186.993	224.158
VIT_14s0006g00100	3479.81	2080.53	3256.5	2262.2	2559.06	3651.32	2415.89	2836.05	2613.4	2846.08	3223.43	2823.79	3450.66	2149.71	3134.89	2403.59	3498.29	3546.97
VIT_14s0006g00140	59.3287	71.8912	100.002	98.4599	111.431	77.9921	106.424	73.2534	103.937	69.3563	90.1504	79.26	91.7979	95.0879	127.09	68.1371	90.593	68.9716
VIT_14s0006g00170	176.775	235.803	122.145	62.7285	152.16	193.907	115.914	164.461	220.473	136.236	209.984	147.873	180.065	154.066	155.788	163.294	178.863	147.072
VIT_14s0006g00180	8054.17	5450.79	8555.18	7787.86	5987.28	7092.99	7240.88	10019.9	9288.23	9537.73	7810.1	3576.16	3994.38	7977.76	2729.02	9606.15	5469.26	8975.44
VIT_14s0006g00250	313.594	317.759	362.865	494.682	329.681	422.159	360.62	425.157	395.277	255.132	343.011	220.035	269.509	906.344	311.575	475.785	385.601	319.501
VIT_14s0006g00300	10.8971	20.1295	24.2862	16.6747	42.2668	6.43971	21.0136	17.2361	26.7718	13.6236	21.9879	7.09791	10.5921	8.42551	9.56591	41.1172	12.7759	10.1429
VIT_14s0006g00350	8852.08	8603.94	10508.8	6336.37	7120.03	6993.53	5754.34	7484.05	8022.08	7092.92	7541.85	5155.45	5783.27	9430.55	5478.54	10145.4	8012.84	8141.69
VIT_14s0006g00380	826.969	664.274	768.587	653.488	854.558	1034.65	741.577	928.594	956.697	808.744	781.67	878.958	948.578	761.907	1018.09	925.724	1011.62	910.831
VIT_14s0006g00410	256.687	280.376	272.863	256.472	366.568	343.451	298.935	329.64	318.899	283.618	319.924	371.457	394.26	306.929	386.736	345.384	393.731	352.972
VIT_14s0006g00420	203.413	307.694	229.29	213.594	314.311	256.158	288.09	237.714	235.434	274.948	259.457	401.032	376.607	245.543	349.839	225.557	333.336	247.486
VIT_14s0006g00430	5647.12	3788.67	5370.11	4310	5224.94	5646.91	3972.92	7163.75	6893.73	5584.42	5024.24	4459.85	4382.76	4649.68	4848.55	5785.78	5926.88	6900.2
VIT_14s0006g00520	24.2158	15.8161	19.2861	22.2329	20.7492	25.7589	9.49001	10.7726	22.0473	17.3391	14.2921	33.1236	36.4838	19.2583	30.0643	19.9712	17.4217	7.10002
VIT_14s0006g00630	340.232	365.207	276.434	354.138	288.951	350.607	323.338	307.377	275.592	325.727	261.656	376.189	386.022	219.063	388.103	267.849	379.794	295.158
VIT_14s0006g00640	3994.39	4659.99	4373.66	3466.74	4205.93	4326.77	3644.84	3727.3	4088.99	4385.55	4128.23	4366.4	4871.17	3880.55	3706.11	3727.57	5072.05	4043.97
VIT_14s0006g00650	260.32	268.873	342.15	381.135	313.543	330.572	401.292	422.284	385.828	310.865	378.192	260.257	290.693	389.981	243.248	370.055	327.529	412.815
VIT_14s0006g00660	601.762	450.039	557.869	489.917	566.375	599.609	636.509	663.589	648.822	590.767	625.556	475.56	519.011	515.16	541.157	509.853	580.725	672.473
VIT_14s0006g00780	100.495	79.0803	69.2872	56.3762	126.032	115.199	93.5444	101.98	106.3	111.465	104.443	79.26	104.744	81.8478	76.5273	113.953	139.374	90.2716
VIT_14s0006g00820	1610.35	2090.6	1454.32	1589.65	1352.54	1258.61	1417.4	1348.72	1232.29	1513.45	1369.85	1261.06	1228.68	1480.48	1091.88	1363.92	1233.46	1297.27
VIT_14s0006g00830	808.807	865.57	865.018	724.157	906.815	824.999	915.108	833.796	852.76	895.439	876.218	848.2	657.885	1029.12	707.878	881.083	817.66	797.23
VIT_14s0006g00850	151.349	155.285	169.289	144.514	182.9	186.752	151.162	163.743	179.528	164.721	170.406	211.754	178.888	185.361	228.215	187.964	198.608	168.372
VIT_14s0006g00860	56.9071	43.1347	47.8581	35.7314	93.7554	110.191	45.4165	107.726	106.3	79.2643	63.7649	63.8812	101.213	92.6806	99.7588	99.856	144.02	105.486
VIT_14s0006g00910	667.145	579.443	571.44	611.404	682.416	736.274	584.313	657.844	652.759	677.462	644.246	643.544	766.159	630.71	869.132	590.913	758.426	626.83
VIT_14s0006g00920	12.1079	20.1295	28.572	11.9105	42.2668	30.052	20.3357	41.6539	35.4332	21.0546	30.7831	18.9278	22.361	34.9057	38.2637	21.146	24.3904	18.2572
VIT_14s0006g00960	438.306	460.104	582.155	497.064	583.282	616.782	643.965	701.652	648.034	594.482	528.809	645.91	588.448	582.564	632.717	583.864	612.084	616.687
VIT_14s0006g00990	164.667	127.966	140.003	62.7285	181.363	196.054	162.686	212.578	199.213	157.29	161.611	100.554	147.112	178.139	213.183	173.867	190.478	175.472
VIT_14s0006g01000	174.354	162.474	182.147	80.1972	250.527	316.262	162.008	237.714	288.978	220.454	228.674	188.095	288.339	226.285	276.045	225.557	288.039	269.801
VIT_14s0006g01020	1933.63	1864.86	1899.33	1685.73	1699.12	1883.26	1982.73	1792.55	1780.32	1950.65	1907.45	1623.06	1772.41	2001.66	1786.09	1832.65	1966.33	1846
VIT_14s0006g01030	2255.7	1974.13	2478.62	2455.15	2096.43	2326.88	2169.82	2329.03	2332.29	2183.48	2150.42	2296.17	2227.86	1937.87	2164.63	2077.01	1835.09	2176.66
VIT_14s0006g01040	73.8581	64.7021	88.5733	54.7882	79.9227	64.3971	52.1951	82.5896	50.3939	66.8793	97.8462	73.3451	116.513	84.2551	47.8296	78.7101	89.4316	60.8573
VIT_14s0006g01080	3001.55	2509	3169.35	2911.71	2383.08	3669.21	2503.33	3160.67	3076.39	3148.28	2766.08	3047.37	2969.31	2867.08	3063.83	2596.26	2663.2	3137.19
VIT_14s0006g01090	221.574	264.56	250.72	283.469	182.9	191.76	264.365	175.952	204.725	204.353	202.289	217.669	200.072	203.416	189.952	191.489	203.254	224.158
VIT_14s0006g01100	30.2697	25.8808	22.8576	20.6448	53.0256	37.2072	35.2486	45.2447	59.8428	29.7241	38.4788	18.9278	25.8917	21.6656	40.9968	42.292	30.1977	44.6287
VIT_14s0006g01240	244.579	204.171	207.861	201.684	273.581	264.744	258.264	272.186	266.143	268.756	181.4	244.878	270.686	256.376	304.743	245.528	261.326	231.258
VIT_14s0006g01250	180.408	255.933	161.432	257.266	172.141	110.906	313.848	188.879	188.977	190.73	292.439	126.579	185.95	163.696	166.72	209.11	228.806	165.329
VIT_14s0006g01370	61.7502	51.7616	90.0019	59.5524	90.6815	80.8542	81.3429	89.0531	73.2287	91.6494	63.7649	73.3451	63.5524	111.939	71.0611	81.0596	66.2026	104.472
VIT_14s0006g01380	56.9071	43.1347	39.2865	35.7314	58.405	42.2159	63.7186	53.1446	33.8584	29.7241	47.274	28.3916	36.4838	39.7203	38.2637	37.5929	47.6194	26.3715
VIT_14s0006g01390	75.0689	54.6373	55.0011	40.4956	46.8777	62.2506	62.3629	56.7354	73.2287	59.4482	78.0571	75.711	60.0217	78.2369	47.8296	46.9911	62.7183	49.7001
VIT_14s0006g01400	630.821	645.583	545.726	822.617	557.922	512.315	750.389	669.335	694.491	835.991	554.095	473.194	393.083	593.397	448.231	679.021	513.361	678.559
VIT_14s0006g01410	313.594	286.127	268.577	326.347	302.784	300.52	284.7	288.704	248.82	315.819	313.328	296.929	349.538	286.467	312.942	290.17	263.649	253.572
VIT_14s0006g01420	90.8092	247.306	101.431	136.573	139.865	137.381	111.847	105.571	121.26	149.859	115.436	120.664	187.126	142.03	162.621	89.2831	97.5617	95.3431
VIT_14s0006g01430	376.555	284.689	282.149	241.386	312.774	284.778	287.412	315.277	329.135	317.057	332.017	247.244	224.787	326.188	199.518	258.451	319.399	299.215
VIT_14s0006g01440	731.316	667.15	695.729	744.007	695.481	731.265	719.885	719.606	673.231	715.856	686.023	610.42	687.307	714.965	661.415	730.711	825.79	750.573
VIT_14s0006g01530	2330.77	2491.75	2385.05	2674.3	2988.65	2585.9	2672.12	2634.25	2191.35	2398.98	2513.22	3883.74	2978.72	2568.58	3401.37	2200.36	2559.83	2453.56
VIT_14s0006g01570	1446.89	1479.52	1555.75	1315.71	1671.46	2007.04	1515.01	1745.15	1911.03	1685.61	1685.37	1788.67	1826.54	1669.45	1876.29	1729.27	1944.27	1722.26
VIT_14s0006g01580	445.57	961.904	528.582	547.882	408.067	463.659	572.79	423.002	372.443	440.908	350.707	741.732	588.448	314.151	505.627	513.378	389.086	296.172
VIT_14s0006g01600	66.5934	102.085	37.1436	52.4061	39.9613	30.052	68.4636	61.7626	53.5435	127.566	56.0692	57.9663	54.1372	36.1093	49.1961	64.6127	19.7446	36.5144
VIT_14s0006g01610	94.4415	173.977	82.8589	96.0778	199.038	84.4318	136.927	68.2262	87.402	113.942	98.9456	227.133	193.011	90.2733	181.752	105.73	103.369	47.6715
VIT_14s0006g01650	1457.79	1496.77	1377.89	892.491	1252.63	1205.66	1232.35	1359.5	1549.61	1471.34	1320.37	942.839	1039.2	1206.05	942.926	1370.96	1421.61	1316.55
VIT_14s0006g01660	918.989	895.764	895.019	1044.15	920.647	928.75	953.746	930.03	884.256	943.741	943.281	1048.12	903.856	913.566	1004.42	850.539	876.894	969.659
VIT_14s0006g01740	180.408	126.528	112.145	120.693	145.244	133.803	188.444	142.198	139.371	173.391	135.226	114.75	154.173	132.401	169.453	158.595	133.567	146.057
VIT_14s0006g01750	32.6913	17.2539	30.0006	29.3792	26.1286	34.3451	27.1143	28.7268	26.7718	24.7701	19.7891	23.6597	31.7762	15.6474	16.3987	23.4955	23.229	20.2858
VIT_14s0006g01790	337.81	355.142	348.579	320.789	426.51	329.141	354.52	325.331	322.049	320.773	295.737	383.287	457.812	302.115	508.36	353.608	361.211	252.558
VIT_14s0006g01820	2347.72	2074.78	2400.76	2020.81	2213.24	2606.65	2337.25	2489.18	2296.07	2344.49	2320.82	2234.66	2140.77	2814.12	2366.88	2373.05	2289.22	2462.69
VIT_14s0006g01830	46.01	38.8212	69.2872	57.9643	80.6911	76.561	49.4836	57.4536	79.5279	38.3937	57.1686	62.6982	87.0903	68.6077	71.0611	65.7875	54.5881	55.7858
VIT_14s0006g01840	146.505	132.28	182.861	148.484	169.067	176.734	156.585	127.834	187.402	170.914	157.214	138.409	149.466	197.398	125.723	178.566	204.415	178.515
VIT_14s0006g01850	66.5934	25.8808	39.2865	18.2627	69.1638	94.4491	24.4029	120.653	95.276	47.0632	50.5722	28.3916	45.8989	72.2187	69.6945	104.555	82.4629	128.815
VIT_14s0006g01860	12.1079	1.43782	4.2858	2.38209	25.3601	8.58629	2.03357	17.2361	15.7481	11.1465	10.994	1.18299	2.35379	4.81458	2.73312	18.7964	17.4217	14.2
VIT_14s0006g01870	579.968	647.021	597.87	541.529	574.06	570.988	531.441	610.445	633.861	630.399	622.258	470.828	521.365	595.804	543.891	624.981	617.891	617.701
VIT_14s0006g01880	1725.37	2047.46	1854.32	1725.43	1813.63	1861.79	1921.73	1734.38	1808.67	1752.48	1741.44	2115.18	1894.8	1816.3	1996.54	1647.04	1701.52	1491
VIT_14s0006g01890	629.61	542.059	610.013	512.944	544.089	549.522	580.246	633.426	638.585	527.603	598.071	481.475	488.412	562.102	534.325	617.933	581.886	647.116
VIT_14s0006g01900	56.9071	84.8316	79.2874	85.7554	65.3214	47.2246	44.7386	57.4536	55.9058	44.5862	60.4667	75.711	65.9062	67.4041	64.2283	62.2632	54.5881	60.8573
VIT_14s0006g01930	634.453	645.583	396.437	732.891	507.97	372.072	577.535	493.383	374.805	745.58	480.436	629.348	387.199	340.631	377.17	610.884	310.107	435.13
VIT_14s0006g01950	157.403	109.275	118.574	76.227	116.042	168.864	101.679	142.916	146.457	97.8419	100.045	93.4558	98.8593	79.4405	117.524	111.604	124.275	178.515
VIT_14s0006g01970	226.418	175.414	239.291	194.538	249.758	236.838	182.344	227.66	257.481	210.546	211.084	171.533	211.841	215.452	233.682	216.159	232.29	241.401
VIT_14s0006g01980	750.689	786.489	730.73	732.097	701.629	767.041	700.905	690.88	726.775	803.79	863.025	632.897	626.109	764.314	558.923	694.293	779.332	792.159
VIT_14s0006g01990	9370.29	9219.32	10870.2	7355.91	9737.5	10137.5	10777.9	10586.5	10567.8	10444.3	9554.84	8816.79	8725.51	10533.1	8766.48	10147.7	8883.93	10550.6
VIT_14s0006g02000	676.831	441.412	566.44	235.033	710.851	754.162	405.359	708.834	807.878	552.373	643.146	435.339	639.054	684.874	608.119	817.645	652.734	873.302
VIT_14s0006g02010	772.483	1071.18	689.3	740.037	647.835	534.496	742.254	581.718	536.223	660.123	634.351	675.484	589.625	727.001	718.81	720.138	632.99	602.487
VIT_14s0006g02020	9784.38	9220.76	10252.4	7332.09	9570.74	10390.8	8271.22	10493.9	10217.4	9198.38	9767.03	8577.82	8999.72	10339.3	9170.98	9703.66	10234.7	10509
VIT_14s0006g02080	1210.79	1282.54	1173.6	1435.61	1009.02	1326.58	1121.85	1110.29	1153.55	1255.84	1076.31	1488.2	1236.92	1000.23	1255.87	957.443	1134.74	1037.62
VIT_14s0006g02090	37.5345	27.3186	25.7148	23.0269	17.6752	40.7849	29.1479	25.8541	37.008	39.6322	19.7891	23.6597	29.4224	20.462	25.9646	25.8451	38.3278	35.5001
VIT_14s0006g02100	8.47552	23.0052	5.7144	13.4985	13.0643	10.0173	12.2014	16.5179	14.1733	12.385	20.8885	11.8299	17.6534	25.2765	10.9325	21.146	15.0988	15.2143
VIT_14s0006g02140	93.2307	44.5725	98.5735	84.9614	66.0899	62.9661	41.3493	81.8714	100	91.6494	62.6655	88.7239	68.26	62.5895	66.9614	63.438	102.208	62.8859
VIT_14s0006g02170	56.9071	89.1451	65.7157	63.5225	59.1735	60.8195	54.9065	44.5265	41.7325	58.2097	58.2679	68.6131	65.9062	60.1822	71.0611	59.9136	70.8484	49.7001
VIT_14s0006g02190	110.182	96.3342	90.7162	56.3762	134.485	120.208	89.4772	132.143	121.26	73.0718	93.4486	78.077	138.874	139.623	128.457	117.478	154.473	152.143
VIT_14s0006g02210	204.623	175.414	225.005	206.448	280.498	339.874	180.988	331.795	340.159	245.224	227.575	328.87	307.17	245.543	430.466	219.683	382.117	319.501
VIT_14s0006g02220	152.559	179.728	146.432	118.311	130.643	120.208	143.706	108.444	105.512	175.868	151.717	175.082	144.758	97.4952	132.556	95.1569	85.9472	97.3717
VIT_14s0006g02230	108.971	163.912	146.432	140.544	118.347	141.674	154.552	110.598	150.394	159.767	105.542	131.311	104.744	179.343	110.691	130.4	123.114	124.757
VIT_14s0006g02240	26478.7	23046.9	29545.6	23067.4	23024.6	27164.1	25443.4	28617.6	26960.7	24402.3	23272	26559.2	24075.8	24594.1	24468.2	25535	25217.4	28926.5
VIT_14s0006g02280	1142.98	1128.69	1144.31	1064.8	1063.59	1127.67	1039.16	1232.38	1171.66	916.494	1140.07	766.574	930.925	1159.11	877.331	1140.71	1105.7	1218.16
VIT_14s0006g02310	8399.24	14763.6	10581.6	11793	8360.37	6708.75	6596.91	9764.24	8739.41	6573.98	8816.05	11344.8	7688.66	9257.23	6478.86	7828.71	7160.33	7054.37
VIT_14s0006g02470	1426.31	1880.67	1368.6	1702.4	1581.55	1290.09	1555.01	1278.34	1156.7	1454	1490.78	1710.6	1711.21	1478.08	1592.04	1410.91	1205.58	1122.82
VIT_14s0006g02480	77.4905	96.3342	88.5733	88.9315	115.273	86.5784	103.034	86.1804	85.8271	118.896	80.2559	52.0513	96.5055	92.6806	81.9935	76.3605	63.8797	69.9859
VIT_14s0006g02490	1391.2	963.342	1220.03	1368.91	1299.51	1305.12	877.826	1378.89	1171.66	1254.61	1468.79	1451.52	1179.25	1446.78	1057.72	1279.33	1147.51	1214.1
VIT_14s0006g02510	600.551	882.824	530.011	701.924	853.021	598.893	938.155	681.543	595.278	793.882	543.101	765.391	1002.72	499.512	653.215	784.751	603.954	536.558
VIT_14s0006g02520	1524.38	1091.31	1328.6	1040.98	1631.5	1539.09	1342.84	1595.77	1619.69	1510.98	1410.52	1378.18	1668.84	1370.95	1660.37	1605.92	1681.78	1758.78
VIT_14s0006g02590	289.379	198.42	349.293	225.505	165.993	280.485	211.492	208.988	256.694	182.06	105.542	163.252	196.542	117.957	159.887	167.993	139.374	195.758
VIT_14s0006g02600	358.393	481.671	499.296	481.183	659.362	422.159	664.979	441.675	443.309	406.23	427.665	554.82	644.939	346.65	638.183	381.803	493.616	338.772
VIT_14s0006g02610	139.241	140.907	92.8591	100.842	179.826	62.2506	151.162	124.962	95.276	137.474	107.741	98.1878	87.0903	92.6806	90.1929	140.973	94.0774	92.3002
VIT_14s0006g02620	2983.38	3450.78	2873.63	3029.23	3309.87	3257.06	3113.4	3096.03	2996.08	3208.97	2700.11	3272.14	3161.14	2475.9	3442.36	3267.05	3231.15	3140.24
VIT_14s0006g02630	12.1079	17.2539	16.4289	16.6747	19.2122	7.15524	10.8457	6.46353	7.08665	12.385	14.2921	17.7448	28.2455	7.22187	35.5305	14.0973	23.229	15.2143
VIT_14s0006g02660	7.26473	10.0648	15.0003	11.1164	26.1286	10.0173	7.45644	10.0544	9.44886	13.6236	17.5903	21.2937	27.0686	25.2765	15.0322	8.22344	11.6145	8.1143
VIT_14s0006g02670	42.3776	21.5674	26.4291	50.024	39.9613	30.052	69.1415	37.3448	41.7325	34.6781	48.3734	31.9406	38.8376	27.6838	54.6624	44.6415	49.9423	41.5858
VIT_14s0006g02680	203.413	175.414	182.147	142.132	275.887	264.744	236.572	285.114	248.033	268.756	190.195	199.924	297.755	219.063	241.881	263.15	256.68	256.615
VIT_14s0006g02690	230.05	260.246	217.862	252.502	259.749	204.64	232.505	219.76	237.009	211.784	227.575	238.963	248.325	208.23	256.913	200.887	242.743	184.6
VIT_14s0006g02710	58.1179	96.3342	69.2872	96.0778	53.0256	55.0953	78.6315	61.0445	65.3546	71.8333	63.7649	60.3322	62.3755	51.7567	40.9968	58.7388	55.7496	54.7716
VIT_14s0006g02720	628.399	859.818	582.155	607.434	687.796	568.126	559.911	524.982	586.617	619.252	604.667	636.446	720.26	599.415	657.315	532.174	566.787	482.801
VIT_14s0006g02750	391.085	452.914	366.436	452.598	387.317	356.331	429.084	347.594	372.443	407.468	410.074	496.854	444.867	343.039	418.167	348.909	373.987	317.472
VIT_14s0006g02760	123.5	81.9559	117.145	103.224	130.643	134.518	129.471	165.179	213.387	101.557	80.2559	54.4173	83.5596	91.477	99.7588	157.42	174.217	135.915
VIT_14s0006g02800	162.246	117.902	175.004	158.012	130.643	134.518	103.034	160.87	166.93	117.658	152.816	102.92	114.159	117.957	129.823	163.294	164.926	164.315
VIT_14s0006g02810	37.5345	27.3186	47.8581	31.7613	45.3407	38.6383	34.5708	26.5723	31.4962	14.8621	29.6837	28.3916	23.5379	27.6838	27.3312	27.0199	27.8748	39.5572
VIT_14s0006g02820	2865.94	3662.14	2959.35	2699.71	2948.68	2532.24	3228.64	2629.22	2585.84	2916.68	2894.71	2884.12	2942.24	2645.61	2515.84	2771.3	2351.93	2509.35
VIT_14s0006g02830	1391.2	1869.17	1472.17	1914.41	1439.38	1405.29	1437.74	1412.64	1193.71	1523.36	1473.19	1860.84	1514.67	1688.71	1403.46	1402.68	1303.15	1165.42
VIT_14s0006g02840	20.5834	41.6969	37.8579	39.7016	40.7298	36.4917	42.705	35.9085	54.3309	27.2471	17.5903	46.1364	36.4838	39.7203	51.9292	36.4181	36.0049	31.4429
VIT_14s0006g02850	102.917	64.7021	87.1447	152.454	69.9323	100.889	92.1887	94.0803	90.5516	80.5028	114.337	133.677	40.0145	97.4952	81.9935	98.6813	104.53	88.2431
VIT_14s0006g02860	352.34	267.435	362.15	274.735	371.948	349.891	348.419	388.53	421.262	344.304	443.056	345.432	375.43	434.516	326.608	405.298	412.314	374.272
VIT_14s0006g02870	116.236	96.3342	95.7163	136.573	116.042	93.7336	105.746	85.4622	100.788	96.6034	106.641	117.116	109.451	104.717	101.125	102.206	96.4003	103.457
VIT_14s0006g02880	95.6523	240.117	141.432	200.89	130.643	147.398	153.874	143.634	147.245	130.043	135.226	192.827	161.235	131.197	159.887	129.225	141.697	112.586
VIT_14s0006g02890	23.005	20.1295	13.5717	8.73435	26.1286	18.6036	23.725	20.1088	19.6851	27.2471	14.2921	8.2809	32.9531	15.6474	34.164	37.5929	23.229	22.3143
VIT_14s0006g02900	388.663	470.168	430.723	458.95	421.131	399.262	411.46	462.502	392.915	568.474	480.436	359.627	362.484	428.497	399.035	481.659	399.539	469.615
VIT_14s0006g02910	6570.95	6953.31	5079.39	7398.79	5836.66	4711.01	7412.38	5516.98	5010.26	6748.61	6305.03	7966.22	6285.8	4885.59	5870.74	5537.9	5116.18	5247.93
VIT_14s0006g02950	3654.16	1961.19	1898.61	2149.44	1709.88	1443.21	2607.04	2255.77	1663	2742.05	2531.91	1270.53	1612.35	2042.58	953.858	2270.84	1773.53	2452.55
VIT_14s0006g02960	1462.63	1532.72	1500.75	1599.18	1436.3	1581.31	1547.55	1561.3	1613.39	1540.7	1510.57	1433.78	1375.79	1621.31	1552.41	1538.96	1645.77	1654.3
VIT_14s0006g02970	29.0589	12.9404	17.8575	14.2926	29.971	6.43971	16.9464	20.1088	10.2363	24.7701	25.2861	42.5875	12.9459	3.61093	9.56591	23.4955	22.0675	13.1857
VIT_14s0006g02990	305.119	225.738	302.863	454.98	1088.95	433.607	404.681	392.121	337.797	437.192	482.635	933.375	759.098	296.097	788.505	375.929	425.09	250.529
VIT_14s0006g03000	1138.14	877.072	1256.45	898.05	1005.95	1159.15	1052.71	1223.04	1334.65	1036.63	1114.79	742.915	953.286	1054.39	925.161	1168.9	1097.57	1368.27
VIT_14s0006g03040	2984.59	2984.92	3316.5	3569.97	2795.76	3025.23	2851.75	3271.26	3154.34	3249.84	3133.28	3531.21	2852.8	2780.42	2940.84	2898.17	2940.79	3268.04
VIT_14s0006g03050	49.6423	64.7021	92.1448	38.9075	61.479	80.1387	44.7386	74.6897	95.276	55.7327	38.4788	29.5746	68.26	52.9604	53.2958	66.9623	94.0774	99.4002
VIT_14s0006g03060	194.937	255.933	150.717	181.833	180.594	181.743	197.257	140.043	132.284	185.776	174.804	216.486	173.004	162.492	177.653	143.323	156.796	109.543
VIT_14s0006g03070	688.939	714.598	775.73	700.336	731.6	852.904	671.757	810.096	836.224	727.002	805.857	803.247	784.99	830.515	845.9	749.508	868.764	861.131
VIT_14s0006g03120	418.933	468.73	501.439	478.801	484.147	550.238	583.636	497.692	526.774	470.632	472.74	578.48	506.065	535.622	587.62	499.28	461.095	439.187
VIT_14s0006g03130	148.927	127.966	150.003	65.9046	245.916	239.7	147.095	252.796	244.096	177.106	189.096	127.762	183.596	213.045	243.248	249.053	262.488	236.329
VIT_14s0006g03140	36.3237	23.0052	25.7148	20.6448	61.479	52.2332	26.4365	50.2719	52.7561	38.3937	48.3734	37.8555	58.8448	37.313	75.1608	34.0685	60.3954	51.7287
VIT_14s0006g03150	67.8042	25.8808	57.144	11.1164	112.199	117.346	47.4501	110.598	90.5516	47.0632	79.1565	48.5024	124.751	114.346	110.691	97.5065	98.7232	91.2859
VIT_14s0006g03160	13.3187	5.75129	4.2858	5.55822	16.9067	13.595	6.77858	15.7997	15.7481	8.66953	17.5903	10.6469	14.1228	13.2401	12.299	22.3208	13.9374	25.3572
VIT_14s0006g03170	99.2847	40.2591	56.4297	20.6448	115.273	130.941	54.9065	138.607	133.071	65.6408	87.9516	61.5152	108.274	105.921	125.723	158.595	160.28	147.072
VIT_14s0006g03200	2612.88	2782.19	3011.49	2319.37	2967.9	2920.77	3121.54	2871.24	2861.43	2624.39	2772.67	2588.37	2770.41	3366.59	2902.57	3029.75	2890.85	2848.12
VIT_14s0006g03220	49.6423	64.7021	47.8581	57.9643	39.9613	41.5004	66.4301	40.9357	35.4332	56.9712	50.5722	36.6725	51.7834	61.3859	46.463	42.292	40.6507	36.5144
VIT_14s0006g03230	8089.28	11337.2	8335.89	10283.5	7855.47	7906.54	9944.85	7058.89	7352.79	8642.29	7551.75	9564.43	8776.11	8269.04	8536.89	7616.08	7566.84	7383
VIT_14s0006g03240	1146.62	1595.98	1089.31	1097.35	1259.55	1187.05	1193.71	1071.51	1109.45	1149.33	1126.88	1261.06	1398.15	1314.38	1449.92	1165.38	1297.34	962.559
VIT_14s0006g03250	21.7942	23.0052	32.1435	57.9643	34.5819	30.052	25.0807	22.2633	30.7088	22.2931	29.6837	42.5875	45.8989	33.702	43.7299	27.0199	23.229	31.4429
VIT_14s0006g03260	37.5345	23.0052	23.5719	29.3792	49.1832	20.7502	31.8593	33.754	41.7325	43.3477	34.0813	47.3194	48.2527	20.462	42.3633	22.3208	32.5206	31.4429
VIT_14s0006g03280	5172.49	3703.83	5044.39	3439.74	5173.45	5811.48	5393.72	5713.04	5961.44	5381.3	4936.28	4839.59	5738.54	4183.87	5254.42	5479.16	6116.19	6359.59
VIT_14s0083g00070	612.659	721.787	633.585	551.058	639.381	586.73	558.555	564.482	561.42	613.06	623.357	667.204	626.109	557.287	766.64	590.913	610.922	499.03
VIT_14s0083g00080	4.84316	18.6917	7.14301	11.1164	9.99033	8.58629	7.45644	12.2089	5.51184	8.66953	6.59637	27.2087	16.4765	12.0364	9.56591	15.2721	3.48435	5.07144
VIT_14s0083g00100	397.139	365.207	408.58	337.463	418.825	424.306	334.862	425.157	424.411	393.845	430.963	472.011	398.968	504.327	419.534	440.541	454.127	546.701
VIT_14s0083g00110	146.505	122.215	148.575	253.296	248.99	137.381	164.719	198.215	196.851	190.73	122.033	396.3	150.643	128.79	213.183	177.391	133.567	136.929
VIT_14s0083g00120	153.77	181.166	199.29	185.803	252.064	198.2	210.136	179.543	174.017	185.776	208.885	201.107	250.679	263.598	168.087	170.343	148.666	133.886
VIT_14s0083g00160	2495.44	3417.71	2490.77	3419.89	2206.33	2461.4	2444.36	2266.54	2188.2	2607.05	2511.02	2606.12	2152.54	2971.8	2331.35	2348.38	2267.15	2224.33
VIT_14s0083g00170	1547.39	1184.77	1374.31	1107.67	1277.23	1525.5	1257.43	1531.14	1600.79	1384.65	1269.8	1354.52	1285.17	1409.47	1467.68	1561.28	1666.68	1677.63
VIT_14s0083g00180	509.742	723.225	585.726	659.046	434.964	541.652	535.508	444.547	537.798	536.273	468.342	559.552	524.896	560.898	460.53	446.415	469.226	384.415
VIT_14s0083g00200	283.325	286.127	294.292	239.798	342.745	304.813	294.19	315.995	378.742	304.672	277.048	217.669	268.332	273.227	344.373	375.929	372.825	346.887
VIT_14s0083g00220	1161.15	910.142	1162.17	834.527	1145.05	1199.93	998.485	1235.25	1296.07	1176.58	1065.31	957.035	1101.57	941.25	1249.04	1114.86	1176.55	1290.17
VIT_14s0083g00230	36.3237	67.5777	42.1437	67.4927	80.6911	43.647	60.3294	37.3448	54.3309	54.4942	57.1686	85.1749	77.6751	62.5895	58.762	48.1659	67.3641	61.8716
VIT_14s0083g00300	5099.84	5158.91	5303.68	5783.73	4929.84	5259.82	4557.24	5297.94	5069.31	5054.34	5240.82	5516.26	5173.63	5132.34	5202.49	4958.73	4794.46	5051.15
VIT_14s0083g00320	440.727	1000.73	540.726	739.243	696.249	591.738	613.461	596.081	591.341	700.994	900.405	716.889	609.632	1156.7	706.511	581.515	591.178	522.358
VIT_14s0083g00330	484.316	398.277	508.582	525.649	553.311	572.419	473.823	535.755	602.365	593.244	543.101	421.143	537.841	637.932	433.199	522.776	587.693	581.187
VIT_14s0083g00340	710.733	905.829	852.161	708.276	844.567	859.344	730.731	792.142	849.61	942.502	866.323	809.162	868.549	819.682	828.135	836.441	817.66	715.073
VIT_14s0083g00360	417.722	642.707	457.867	518.503	554.079	410.711	633.119	450.293	444.096	460.724	554.095	434.156	503.711	517.567	425	493.406	486.647	445.272
VIT_14s0083g00370	38.7452	21.5674	32.8578	58.7583	45.3407	32.9141	13.5572	22.2633	26.7718	34.6781	43.9758	26.0257	7.06138	103.513	15.0322	24.6703	36.0049	40.5715
VIT_14s0083g00390	20.5834	24.443	25.7148	30.1732	16.9067	39.3538	14.9129	26.5723	31.4962	35.9166	39.5782	40.2215	20.0072	24.0729	25.9646	15.2721	38.3278	42.6001
VIT_14s0083g00400	305.119	470.168	542.868	778.151	572.523	570.272	498.903	507.746	382.679	454.531	590.375	538.258	460.166	1017.08	541.157	548.621	468.064	468.601
VIT_14s0083g00410	16.951	51.7616	32.8578	46.0538	36.8874	27.9054	33.8929	20.8269	21.2599	12.385	20.8885	41.4045	38.8376	46.9421	57.3955	29.3694	32.5206	19.2715
VIT_14s0083g00420	62.961	66.1399	74.2873	78.6091	83.7651	70.8369	69.1415	79.7169	58.268	49.5402	84.6534	85.1749	81.2058	98.6988	84.7267	66.9623	75.4942	76.0716
VIT_14s0083g00440	171.932	158.161	157.86	134.191	149.855	175.303	164.042	184.57	187.402	148.621	184.698	157.337	121.22	180.547	151.688	197.363	193.962	186.629
VIT_14s0083g00450	3711.07	3723.96	3716.51	3196.77	3511.99	3481.02	2881.57	3607.37	3616.55	3595.38	3690.67	3376.24	3301.19	3331.69	3272.91	3530.2	3857.17	4007.45
VIT_14s0083g00460	14.5295	33.0699	22.1433	5.55822	21.5176	3.57762	14.9129	7.1817	15.7481	18.5776	12.0933	9.46388	15.2996	14.4437	15.0322	11.7478	24.3904	14.2
VIT_14s0083g00520	3242.49	2391.1	3312.93	3661.28	3345.99	3494.62	3090.35	3807.02	3338.6	3997.89	3592.82	3448.4	3310.61	2883.93	3323.47	3436.22	2969.83	3993.25
VIT_14s0083g00530	988.004	1134.44	1069.31	1189.46	1182.7	1250.02	1116.43	1091.62	1245.67	1226.12	1156.56	1562.72	1294.59	1293.92	1620.74	1112.51	1207.91	1075.15
VIT_14s0083g00540	1118.77	1227.9	1288.6	1230.75	1133.52	1318.71	1083.22	1311.38	1353.55	1254.61	1250.01	1149.86	1154.53	1417.89	1322.83	1261.71	1199.78	1367.26
VIT_14s0083g00550	33.9021	41.6969	41.4294	51.612	48.4147	46.509	52.8729	40.9357	45.6695	37.1551	40.6776	37.8555	23.5379	36.1093	27.3312	43.4667	46.458	41.5858
VIT_14s0083g00570	7.26473	0	17.1432	11.1164	5.37941	17.1726	9.49001	26.5723	20.4725	13.6236	14.2921	18.9278	8.23827	9.62916	15.0322	12.9225	12.7759	22.3143
VIT_14s0083g00580	23708.5	24749.3	26911.3	25859.2	24348	26973.8	29389.9	27532.5	27130.8	25872.4	27824.6	27969.3	23076.6	25381.3	30628.7	28226.4	28168.6	30014.8
VIT_14s0083g00590	1054.6	1567.23	1350.74	1454.67	1237.26	1343.75	1639.74	1260.39	1321.27	1357.4	1358.85	1213.74	1219.26	1301.14	1214.87	1287.56	1408.84	1167.45
VIT_14s0083g00610	191.305	120.777	172.146	126.251	176.752	135.95	191.834	194.624	177.166	177.106	171.506	127.762	142.404	193.787	105.225	152.721	176.54	184.6
VIT_14s0083g00620	108.971	235.803	159.289	265.207	225.167	315.546	176.243	173.079	224.41	190.73	235.271	236.597	277.747	298.504	261.013	136.274	190.478	131.857
VIT_14s0083g00630	652.615	533.433	512.868	514.532	547.931	719.817	534.152	640.608	611.026	517.695	554.095	525.245	682.6	557.287	604.019	552.145	484.324	617.701
VIT_14s0083g00640	202.202	260.246	177.861	277.911	327.375	266.89	216.915	208.988	224.41	252.655	259.457	337.151	383.668	259.987	299.276	239.655	281.071	149.1
VIT_14s0083g00670	1732.64	1019.42	1785.04	2014.46	946.776	1163.44	1517.05	1401.15	1182.68	1411.9	1314.88	1408.94	1127.47	624.691	1157.48	1375.66	823.468	1511.29
VIT_14s0083g00690	536.379	451.477	512.154	368.431	431.89	430.03	454.165	547.964	491.341	530.08	480.436	300.478	366.015	581.36	307.476	592.088	452.965	540.616
VIT_14s0083g00710	841.498	980.596	1070.74	851.996	735.442	965.242	988.995	1068.64	973.233	868.192	836.64	1028.01	782.636	971.341	796.704	841.14	891.993	818.53
VIT_14s0083g00720	49.6423	41.6969	45.0009	30.9672	47.6462	38.6383	47.4501	48.1174	52.7561	45.8247	67.0631	30.7576	48.2527	56.5713	40.9968	46.9911	45.2965	45.643
VIT_14s0083g00730	395.928	241.554	352.864	301.732	350.43	356.331	387.735	392.839	443.309	416.138	356.204	236.597	216.549	332.206	218.649	448.765	334.497	418.901
VIT_14s0083g00740	18027.4	18815.4	19730.4	19853.2	14227.8	20057.6	16583.1	16308.9	17261.5	16363.1	17422.1	21804.8	19224.6	15886.9	19677.1	14670.6	16692.3	17326.1
VIT_14s0083g00750	2118.88	1399	2061.47	1374.47	2351.57	2606.65	1761.75	2744.85	2717.33	2080.69	2328.52	2030	2319.66	2286.92	2387.38	2719.61	2767.73	2951.58
VIT_14s0083g00760	10.8971	5.75129	4.2858	7.14628	20.7492	9.30181	5.42286	14.3634	24.4096	7.43103	6.59637	5.91493	11.769	14.4437	9.56591	25.8451	15.0988	25.3572
VIT_14s0083g00770	72.6473	112.15	78.5731	104.812	75.3117	90.8715	102.357	68.2262	97.6382	87.9339	83.554	100.554	72.9675	78.2369	97.0257	77.5353	90.593	78.1002
VIT_14s0083g00780	1066.7	900.078	1273.6	937.751	1158.11	1204.94	1098.13	1241.72	1307.88	1159.24	1138.97	1012.64	933.278	1252.99	1056.35	1171.25	1243.91	1449.42
VIT_14s0083g00790	484.316	369.521	455.009	345.404	545.626	498.72	479.923	530.01	564.569	504.072	511.219	352.53	391.906	577.749	375.804	580.34	621.375	605.53
VIT_14s0083g00800	291.8	159.598	258.577	179.451	181.363	217.519	218.948	229.096	234.647	265.04	196.792	163.252	162.412	138.419	176.286	220.858	204.415	258.643
VIT_14s0083g00810	408.036	404.028	433.58	367.637	309.7	369.21	333.506	448.856	418.899	397.56	357.303	275.636	267.155	392.388	288.344	354.783	351.919	393.544
VIT_14s0083g00870	897.195	864.132	964.306	944.897	829.966	1000.3	801.906	967.375	928.351	894.201	836.64	867.128	915.625	860.606	900.562	801.198	890.832	961.545
VIT_14s0083g00880	4889.17	4133.74	4885.82	3628.72	4855.3	5310.62	5131.38	5719.51	4906.32	5377.59	4865.92	3650.69	4121.49	5084.19	4236.33	5489.73	4580.76	5981.26
VIT_14s0083g00910	102.917	86.2694	103.574	116.723	141.402	114.484	96.9337	130.707	115.749	172.152	142.921	97.0048	142.404	116.754	117.524	144.498	95.2388	136.929
VIT_14s0083g00920	56.9071	96.3342	62.1442	130.221	79.9227	49.3711	105.068	46.6811	72.4413	63.1638	60.4667	150.239	56.491	46.9421	53.2958	95.1569	65.0412	36.5144
VIT_14s0083g00930	2275.07	2370.97	2387.19	2151.83	2187.11	2550.84	2008.49	2282.34	2419.7	2204.54	2185.6	2672.36	2403.22	2144.89	2791.88	2069.96	2180.04	2343.01
VIT_14s0083g00940	3803.09	2808.07	2758.63	1679.38	1975.78	2764.78	2480.28	2517.9	2471.66	2603.34	2785.87	1116.74	2058.39	2632.37	1187.54	2603.31	2264.83	2846.09
VIT_14s0083g00950	477.051	508.99	416.437	520.091	330.449	423.59	514.494	319.586	400.789	401.276	375.993	365.542	346.007	383.963	314.309	361.831	391.408	359.058
VIT_14s0083g00960	20354.6	13023.8	19139.7	12017.7	25491.5	27424.6	15996.1	28611.9	29396.2	21270.1	21876.9	18207.3	23135.4	24579.6	23112.6	26930.6	27826	31069.7
VIT_14s0083g00970	3099.62	4566.53	2915.06	3638.25	2713.53	2549.41	2916.82	2477.69	2485.05	2825.03	2969.47	2875.84	2822.2	3275.12	2525.4	2726.66	2652.75	2503.26
VIT_14s0083g00990	1064.28	797.992	1105.74	813.088	1009.02	1017.47	1002.55	1174.21	1143.31	1077.5	1065.31	1058.77	1014.48	1006.25	998.955	1093.72	1002.33	1188.75
VIT_14s0083g01000	751.9	1039.55	723.586	917.9	707.777	851.473	827.664	807.941	787.405	822.367	858.628	677.85	703.784	897.919	658.682	811.771	713.13	746.516
VIT_14s0083g01010	601.762	921.645	680.014	796.414	676.269	622.506	688.704	514.928	500.002	592.005	646.444	728.719	879.141	606.637	721.543	586.214	596.985	485.844
VIT_14s0083g01020	364.447	304.819	318.578	366.049	497.211	349.891	583.636	357.649	362.206	388.891	405.677	405.764	453.105	250.358	485.128	380.628	365.857	350.944
VIT_14s0083g01030	20.5834	25.8808	30.0006	30.1732	23.0546	20.0347	13.5572	19.3906	33.8584	17.3391	20.8885	17.7448	30.5993	8.42551	27.3312	18.7964	25.5519	7.10002
VIT_14s0083g01050	400.771	724.663	453.581	651.106	442.649	460.797	614.817	429.466	393.703	495.402	533.207	731.085	601.394	465.81	748.874	425.269	466.903	365.144
VIT_14s0083g01070	12.1079	31.6321	15.7146	19.0568	12.2958	15.026	23.0472	17.2361	11.8111	6.19252	14.2921	26.0257	12.9459	16.851	15.0322	8.22344	8.13014	6.08573
VIT_14s0083g01090	1265.27	1324.24	1390.03	1361.76	1354.84	1337.31	1308.94	1384.63	1276.38	1346.25	1424.82	1199.55	1131	1573.16	1113.75	1390.94	1296.18	1314.52
VIT_14s0083g01110	98.0739	396.839	133.574	273.147	198.27	178.881	128.793	112.035	137.008	219.215	185.798	398.666	361.307	168.51	307.476	89.2831	147.504	67.9573
VIT_14s0083g01130	14.5295	34.5078	24.2862	30.1732	14.6013	17.8881	14.9129	17.9543	13.3859	8.66953	6.59637	70.9791	18.8303	15.6474	25.9646	11.7478	16.2603	17.2429
VIT_14s0083g01140	4551.36	4756.32	3372.93	3052.26	1972.71	2384.84	2458.59	2367.81	1710.24	3221.35	2966.17	2647.52	2575.05	1958.33	1708.2	2270.84	2414.65	2661.49
VIT_14s0083g01160	2363.46	2865.58	2689.34	3577.11	2531.4	3310.01	2567.73	2824.56	2806.31	2898.1	2712.21	3360.86	3094.06	2711.81	3503.86	2776	2537.77	2332.86
VIT_14s0083g01170	1741.11	1767.09	2035.04	1990.64	1835.92	1662.16	1916.3	2138.71	2383.48	1773.54	1622.71	2245.31	1820.66	1486.5	2466.64	2113.42	2103.38	2132.03
VIT_14s0083g01180	283.325	358.018	267.148	291.41	222.861	291.934	309.103	206.833	258.269	274.948	310.029	302.844	328.354	263.598	263.746	266.674	261.326	242.415
VIT_14s0083g01200	215.52	205.609	202.147	208.83	156.771	213.942	193.867	190.315	227.56	205.592	239.668	120.664	167.119	219.063	127.09	202.062	139.374	200.829
VIT_14s0068g00110	122.29	217.111	77.8588	86.5494	267.433	135.234	174.209	147.943	118.898	136.236	159.412	194.01	193.011	140.826	173.553	121.002	176.54	86.2145
VIT_14s0068g00210	55.6963	35.9456	31.4292	52.4061	33.0449	37.9228	56.2622	45.2447	29.9214	34.6781	37.3794	42.5875	16.4765	24.0729	49.1961	39.9424	48.7809	25.3572
VIT_14s0068g00220	3173.48	3206.35	3460.79	3695.42	2918.71	3438.09	3612.98	3234.64	3325.21	3622.63	3159.66	3552.5	3244.7	3217.34	3208.68	3329.32	3263.67	3260.94
VIT_14s0068g00230	602.973	1009.35	667.157	901.226	631.696	572.419	646.676	538.628	552.758	596.959	549.698	638.812	570.795	619.877	594.453	669.623	497.1	498.015
VIT_14s0068g00240	1739.9	1403.32	1867.9	1427.67	2115.64	2024.93	1470.27	2058.99	2054.34	1828.03	1930.54	2045.38	1968.95	1854.82	2150.96	1809.16	1966.33	2084.36
VIT_14s0068g00250	297.854	385.337	262.148	269.971	343.514	262.597	262.331	294.45	314.962	338.112	255.06	327.687	309.524	234.711	400.402	347.734	301.977	242.415
VIT_14s0068g00290	334.178	358.018	405.723	404.956	401.15	390.676	387.057	460.347	465.356	499.118	446.354	341.883	310.701	414.054	297.91	462.862	411.153	342.829
VIT_14s0068g00300	905.67	772.111	1061.45	901.226	837.651	1087.6	662.945	1121.06	1010.24	796.359	615.661	1112.01	970.939	646.357	956.591	901.054	729.39	1190.77
VIT_14s0068g00310	142.873	119.339	112.859	80.9912	172.141	148.113	140.317	145.07	170.079	161.006	145.12	89.9069	117.69	122.772	122.99	159.77	150.988	121.715
VIT_14s0068g00340	440.727	602.448	474.296	395.428	584.819	450.78	547.031	558.018	487.404	537.511	584.878	406.947	451.928	588.582	444.132	556.844	603.954	625.816
VIT_14s0068g00360	254.266	214.236	251.434	277.117	338.903	225.39	345.708	282.959	234.647	302.195	371.596	209.388	267.155	293.689	196.785	321.889	291.524	356.015
VIT_14s0068g00370	13.3187	21.5674	12.1431	9.52838	15.3697	19.3191	16.9464	24.4178	18.1103	12.385	15.3915	21.2937	4.70758	15.6474	10.9325	15.2721	17.4217	27.3858
VIT_14s0068g00380	7.26473	5.75129	16.4289	8.73435	9.99033	8.58629	21.6915	16.5179	7.87405	16.1006	5.49698	14.1958	12.9459	10.8328	15.0322	5.87388	32.5206	13.1857
VIT_14s0068g00390	1375.46	1634.81	1400.03	1697.64	1307.96	1431.05	1496.03	1312.1	1318.9	1440.38	1297.29	1639.62	1372.26	1505.76	1363.83	1327.5	1286.89	1086.3
VIT_14s0068g00400	47.2208	74.7668	60.0012	35.7314	123.726	59.3885	97.6115	68.2262	56.6932	58.2097	97.8462	101.737	90.621	55.3676	69.6945	57.5641	75.4942	48.6858
VIT_14s0068g00410	1128.46	1118.63	1116.45	979.041	1109.7	1074	1068.3	1128.96	1174.81	1180.3	1208.24	783.136	861.488	1245.77	843.167	1315.75	1184.68	1099.49
VIT_14s0068g00420	628.399	467.293	640.728	434.335	738.516	694.058	612.106	698.78	770.082	577.143	711.309	617.518	697.899	671.634	784.405	671.972	756.103	610.601
VIT_14s0068g00430	1942.11	1594.55	1887.18	1305.39	2758.87	2346.92	1792.93	2466.91	2454.34	2195.87	2348.31	2027.64	2491.49	2241.19	2417.44	2616.23	2869.94	2586.43
VIT_14s0068g00500	318.437	582.319	337.864	459.744	454.176	403.555	324.694	280.086	258.269	458.247	306.731	946.388	881.495	350.261	739.308	198.537	378.632	230.243
VIT_14s0068g00510	7.26473	35.9456	8.57161	18.2627	16.9067	11.4484	21.6915	8.61804	3.14962	23.5316	16.4909	27.2087	18.8303	13.2401	8.19935	17.6217	16.2603	2.02858
VIT_14s0068g00520	2212.11	2636.97	2551.48	2960.94	2104.12	2419.9	2187.45	2365.65	2368.51	2504.26	2417.57	2647.52	2362.03	2224.33	2317.68	2153.37	2144.04	2238.53
VIT_14s0068g00630	2110.4	1522.66	2170.76	1598.39	2028.81	2832.04	1577.38	2424.54	2826.78	2044.77	2097.65	2127.01	2065.45	2260.44	2284.89	2172.16	2572.61	2888.69
VIT_14s0068g00640	4944.86	6240.15	5165.82	5166.76	6688.14	6206.45	5505.56	5491.13	5822.07	6103.35	5354.05	7136.95	7229.67	4903.65	7670.5	5495.61	5606.32	4844.24
VIT_14s0068g00650	15.7403	27.3186	13.5717	7.94031	19.2122	12.8794	16.9464	22.9814	20.4725	24.7701	19.7891	5.91493	14.1228	9.62916	13.6656	29.3694	16.2603	6.08573
VIT_14s0068g00660	2202.42	2139.48	2317.91	2204.23	2132.55	2078.6	2018.66	2202.63	2250.4	2224.35	2493.43	1955.47	1900.69	2203.87	1924.12	2168.64	2448.34	2281.13
VIT_14s0068g00670	82.3336	149.534	195.004	167.541	122.189	166.002	126.759	91.2076	125.197	107.75	150.617	139.592	115.336	136.012	148.955	117.478	148.666	118.672
VIT_14s0068g00680	359.604	343.64	377.151	326.347	404.224	363.486	301.647	305.94	317.324	338.112	360.602	616.335	497.827	332.206	776.206	314.84	428.575	279.944
VIT_14s0068g00690	1201.1	1086.99	1149.31	1094.18	987.506	1071.85	923.242	1274.75	1338.59	1101.03	1107.09	742.915	980.354	1274.66	900.562	1170.08	1070.86	1377.4
VIT_14s0068g00700	330.545	296.192	341.436	302.526	346.588	349.176	361.298	351.185	387.403	315.819	381.49	356.079	291.87	417.665	367.604	414.696	382.117	399.629
VIT_14s0068g00710	1049.75	1184.77	993.592	820.235	924.49	903.707	883.249	933.621	889.768	918.971	993.853	803.247	749.683	1160.31	718.81	918.676	929.159	995.017
VIT_14s0068g00720	2580.19	2011.52	2793.63	1733.37	2391.53	3084.62	2212.53	2877.71	2858.28	2592.19	2334.02	2871.1	2824.55	2409.7	2858.84	2532.82	2562.16	2936.36
VIT_14s0068g00730	412.879	555	578.583	497.064	462.629	337.727	412.815	383.503	355.12	335.635	381.49	330.053	302.462	444.145	364.871	628.506	479.679	312.401
VIT_14s0068g00740	1689.05	1288.29	2089.33	1864.39	939.091	1818.15	1591.61	1441.37	1796.86	1136.95	1073.01	1198.36	1079.21	1215.68	1231.27	1506.06	1054.6	1246.56
VIT_14s0068g00750	220.364	337.889	308.578	321.583	238.231	251.149	215.559	277.214	242.521	273.71	260.557	369.091	270.686	351.464	273.312	223.208	248.55	255.601
VIT_14s0068g00760	156.192	120.777	122.86	70.6688	133.717	145.967	102.357	175.952	131.497	116.419	190.195	99.3707	111.805	158.881	136.656	164.469	156.796	198.8
VIT_14s0068g00770	293.011	333.575	290.72	287.439	259.749	302.667	172.854	308.813	251.182	279.902	311.129	287.465	251.856	306.929	245.981	319.539	318.237	375.287
VIT_14s0068g00780	1432.36	1342.93	1739.32	1659.53	1354.07	1567	1490.61	1712.84	1692.92	1514.69	1345.66	1465.72	1235.74	1409.47	1489.55	1610.62	1519.18	1711.1
VIT_14s0068g00790	1219.26	1491.02	1471.46	1503.9	1123.53	1273.63	1199.81	1302.04	1218.12	1184.01	1385.24	1464.54	1208.67	1346.88	1146.54	1110.16	1085.96	1033.56
VIT_14s0068g00800	1173.25	1641.99	1302.88	1410.2	1218.05	1433.91	1353	1260.39	1267.72	1284.33	1385.24	1307.2	1468.77	1386.6	1254.5	1231.17	1216.04	1181.65
VIT_14s0068g00810	779.748	658.523	742.873	525.649	853.789	759.171	564.656	848.877	830.712	812.459	876.218	596.224	634.347	781.165	668.247	908.103	878.056	912.859
VIT_14s0068g00830	466.154	483.109	423.58	560.586	459.555	507.306	598.548	366.267	408.663	558.566	615.661	466.096	471.935	480.254	542.524	405.298	452.965	449.33
VIT_14s0068g00840	2905.89	2951.85	3267.93	3404.01	2836.49	3409.47	2497.23	3052.94	3430.72	2888.19	3404.83	3500.45	2888.1	3724.08	3540.75	3271.75	3451.83	3753.88
VIT_14s0068g00850	13557.2	11731.2	12433.8	11750.1	11950	13128.4	11063.3	13806.1	13884.3	13660.7	12915.7	10613.7	11421.8	12133.9	11268.6	12983.6	12153.4	14494.2
VIT_14s0068g00870	153.77	173.977	115.717	174.687	152.929	145.967	235.217	91.2076	134.646	161.006	144.021	153.788	262.448	96.2916	181.752	138.624	141.697	96.3574
VIT_14s0068g00880	441.938	530.557	376.436	438.305	354.273	364.917	421.628	291.577	279.529	351.735	356.204	470.828	450.751	376.741	423.633	334.811	331.013	256.615
VIT_14s0068g00890	1182.94	1291.17	1198.6	1002.86	1250.33	1260.75	949.001	1296.3	1215.75	1250.89	1212.63	1168.79	1138.06	1240.96	1288.67	1295.78	1285.72	1268.87
VIT_14s0068g00910	512.164	487.422	555.726	523.267	514.118	472.246	436.54	495.537	482.679	539.988	529.908	416.411	438.982	563.306	490.595	441.716	470.387	468.601
VIT_14s0068g00920	3960.49	3531.29	5542.26	4110.7	6040.31	2613.09	4625.02	4297.53	3270.88	3537.17	3823.7	7149.96	4460.44	4215.16	5766.88	4881.2	4223.03	7434.73
VIT_14s0068g00930	458.889	503.238	537.868	384.311	695.481	299.804	467.722	455.32	396.065	444.623	370.496	535.892	389.553	352.668	587.62	595.612	557.496	525.401
VIT_14s0068g00940	44.7992	35.9456	28.572	70.6688	41.4983	48.6556	46.0943	45.2447	52.7561	55.7327	52.771	97.0048	47.0758	51.7567	58.762	68.1371	45.2965	49.7001
VIT_14s0068g00950	29.0589	12.9404	14.286	0	23.8231	22.1812	10.8457	30.8813	23.6222	12.385	19.7891	11.8299	18.8303	18.0547	17.7653	24.6703	33.682	20.2858
VIT_14s0068g00970	348.707	191.231	242.148	160.394	242.073	245.425	225.727	263.568	281.104	315.819	395.782	154.971	211.841	256.376	159.887	351.258	308.946	454.401
VIT_14s0068g00980	392.296	244.43	302.863	371.607	337.366	407.849	327.405	420.848	428.348	343.066	390.285	456.632	317.762	371.926	486.495	375.929	367.018	493.958
VIT_14s0068g00990	43.5884	37.3834	63.5728	78.6091	26.897	51.5177	46.0943	50.9901	48.8191	52.0172	32.9819	57.9663	49.4296	39.7203	56.0289	31.719	36.0049	39.5572
VIT_14s0068g01000	1410.57	1079.81	1348.6	1067.18	1525.45	1747.31	1239.8	1737.97	1673.24	1262.04	1344.56	1285.9	1511.13	1482.89	1508.68	1455.55	1672.49	1921.06
VIT_14s0068g01010	753.111	572.254	696.443	438.305	682.416	793.516	528.051	823.023	878.744	704.709	750.887	552.454	636.701	706.539	594.453	757.731	811.853	935.174
VIT_14s0068g01020	82.3336	58.9508	45.7152	45.2598	73.0063	74.4145	48.8058	66.7898	56.6932	48.3017	45.0752	93.4558	61.1986	46.9421	68.328	62.2632	61.5568	44.6287
VIT_14s0068g01030	1771.38	2391.1	2106.47	2192.32	2035.72	2111.51	1945.45	1943.37	1955.13	2039.82	2006.4	2485.45	1927.76	2032.96	1900.88	1829.13	2027.89	1793.26
VIT_14s0068g01040	16.951	10.0648	25.0005	11.1164	8.45336	11.4484	8.81215	16.5179	17.3229	16.1006	13.1927	9.46388	7.06138	8.42551	17.7653	27.0199	24.3904	14.2
VIT_14s0068g01050	316.016	447.163	296.435	364.46	261.286	295.511	291.479	282.959	267.718	273.71	326.52	294.563	298.932	244.34	250.08	298.393	288.039	262.701
VIT_14s0068g01060	290.589	347.953	391.437	438.305	330.449	338.443	268.432	364.83	349.608	310.865	338.614	354.896	330.708	403.221	310.209	308.966	356.565	324.572
VIT_14s0068g01070	65.3826	58.9508	48.5724	31.7613	84.5336	62.2506	67.7858	56.7354	60.6302	78.0258	90.1504	55.6003	67.0831	66.2004	71.0611	85.7587	85.9472	59.843
VIT_14s0068g01090	198.569	188.355	173.575	221.535	222.093	217.519	246.74	178.106	188.19	205.592	205.587	201.107	261.271	207.027	176.286	211.46	205.577	187.643
VIT_14s0068g01100	826.969	1071.18	823.589	912.342	868.39	757.74	939.511	803.632	716.539	879.339	845.435	942.839	764.982	959.305	815.836	824.693	854.827	841.859
VIT_14s0068g01110	870.557	746.23	741.444	627.285	821.513	857.197	741.577	715.297	805.515	709.663	768.477	728.719	895.618	752.278	852.733	708.391	821.145	795.202
VIT_14s0068g01120	260.32	290.44	244.291	319.201	372.716	350.607	369.433	249.205	340.946	276.187	311.129	445.985	499.004	278.042	517.926	286.646	377.471	267.772
VIT_14s0068g01130	3330.88	2915.91	3968.65	2912.51	3191.53	3860.97	2899.2	4036.83	4116.55	3443.04	3522.46	3462.6	2675.08	4058.69	3674.68	3830.95	3810.72	4469.97
VIT_14s0068g01140	70.2258	57.5129	65.7157	73.8449	56.868	63.6816	55.5843	55.2991	55.1184	70.5948	59.3673	53.2343	74.1444	37.313	39.6302	57.5641	32.5206	54.7716
VIT_14s0068g01150	173.143	152.409	130.717	140.544	142.17	130.941	174.887	123.525	148.032	126.328	163.81	70.9791	124.751	170.918	65.5948	156.245	131.244	169.386
VIT_14s0068g01170	60.5394	37.3834	47.8581	42.8777	53.7941	54.3798	44.0608	48.1174	58.268	75.5488	47.274	50.8684	51.7834	46.9421	39.6302	81.0596	55.7496	57.8144
VIT_14s0068g01180	734.949	1094.18	787.159	902.02	647.066	670.446	801.906	733.252	673.231	787.689	671.73	841.102	656.708	788.387	609.485	777.702	702.677	737.387
VIT_14s0068g01190	744.635	681.528	707.158	620.139	647.835	553.1	654.811	825.896	806.303	684.893	614.562	761.842	574.325	566.917	784.405	748.333	645.766	791.145
VIT_14s0068g01200	434.673	247.306	378.579	277.117	237.462	369.926	244.029	280.805	328.348	266.279	260.557	516.964	481.35	215.452	423.633	267.849	360.049	346.887
VIT_14s0068g01210	121.079	166.788	121.431	316.025	234.389	197.485	197.934	145.789	169.292	179.583	126.43	774.855	394.26	89.0697	455.064	138.624	147.504	123.743
VIT_14s0068g01230	412.879	333.575	375.008	407.338	434.964	452.211	297.58	397.866	389.765	365.359	332.017	488.573	374.253	374.333	487.862	368.88	342.628	358.044
VIT_14s0068g01240	90.8092	67.5777	56.4297	61.9345	122.958	108.044	107.102	124.243	101.575	100.319	105.542	44.9534	109.451	107.124	69.6945	97.5065	82.4629	104.472
VIT_14s0068g01250	314.805	179.728	365.722	171.511	288.951	276.192	297.58	357.649	436.222	287.333	229.774	370.274	255.386	197.398	386.736	350.084	397.216	440.201
VIT_14s0068g01260	2328.35	2163.92	2846.49	2163.74	2398.45	2344.06	2828.7	2601.21	2572.45	2431.19	2357.1	2572.99	2197.26	2787.64	2387.38	2488.18	2415.81	2457.62
VIT_14s0068g01270	98.0739	117.902	189.29	227.093	120.652	105.182	166.753	128.552	143.308	159.767	158.313	202.29	122.397	131.197	179.019	148.022	141.697	134.9
VIT_14s0068g01280	5180.97	6025.92	5750.83	4698.28	4930.61	5261.96	4976.15	5263.47	4985.06	4914.39	5406.83	4626.65	5204.23	5964.06	4602.57	5025.7	4847.89	5046.08
VIT_14s0068g01300	777.326	575.129	798.588	928.223	687.027	693.343	779.537	816.559	1060.63	786.451	587.077	1266.98	857.957	452.57	1106.91	666.099	795.593	841.859
VIT_14s0068g01310	399.56	595.259	494.296	428.777	372.716	368.495	518.561	408.639	450.396	530.08	406.776	311.125	361.307	423.683	385.37	452.289	421.606	421.944
VIT_14s0068g01320	25.4266	64.7021	45.0009	47.6419	29.2025	35.7762	35.9265	43.0902	26.7718	35.9166	49.4728	31.9406	28.2455	39.7203	27.3312	45.8163	34.8435	36.5144
VIT_14s0068g01330	4925.49	7544.26	6416.56	6195.03	4886.81	6017.56	5965.83	4628.61	5092.15	5468	5104.49	5196.85	6477.63	4859.11	5097.27	4397.19	4979.13	4567.34
VIT_14s0068g01340	1244.69	1429.2	1280.74	1562.65	1198.07	1050.39	1222.86	1121.06	1193.71	1155.53	1315.98	1492.93	1199.26	1222.9	1169.77	1113.69	1206.75	1218.16
VIT_14s0068g01350	140.452	63.2642	140.717	146.896	113.736	133.087	103.712	135.734	140.158	137.474	79.1565	192.827	189.48	66.2004	185.852	109.254	98.7232	153.157
VIT_14s0068g01360	16013.9	12353.8	13595.3	22418.7	13028.2	12771.4	10588.1	15394	13877.2	15907.4	11870.2	26175.9	15642.1	8394.22	18235.4	14503.8	10921.1	12732.4
VIT_14s0068g01370	1702.37	2254.51	1742.89	1907.26	1514.69	1656.44	1630.25	1584.28	1490.56	1582.81	1654.59	1815.88	1694.73	1700.75	1577.01	1571.85	1615.58	1435.22
VIT_14s0068g01380	90.8092	99.2098	62.8585	59.5524	69.1638	67.2592	47.4501	63.199	46.4569	63.1638	49.4728	140.775	87.0903	85.4588	98.3923	49.3406	72.0099	64.9144
VIT_14s0068g01400	868.136	1598.86	991.449	1132.29	660.899	837.163	1044.58	858.931	718.113	863.238	812.453	1009.09	972.116	808.849	720.177	700.167	723.583	660.302
VIT_14s0068g01430	302.697	306.256	296.435	309.672	393.465	359.908	397.903	288.704	398.427	273.71	306.731	411.679	394.26	317.762	430.466	283.121	318.237	312.401
VIT_14s0068g01440	572.703	424.158	588.584	435.129	607.105	677.601	509.071	740.433	795.279	512.741	502.424	535.892	504.888	528.4	553.456	620.282	734.036	727.245
VIT_14s0068g01450	460.1	412.655	484.296	312.848	407.298	450.064	390.446	395.712	454.333	372.79	402.379	367.908	387.199	387.574	373.071	393.55	337.982	461.501
VIT_14s0068g01460	454.046	589.508	524.297	575.673	502.591	430.03	532.796	460.347	436.222	424.807	557.393	579.663	524.896	506.734	450.965	437.017	462.257	426.001
VIT_14s0068g01470	1876.72	1620.43	1905.04	1459.43	2044.18	1873.24	1329.28	2079.82	2170.09	2041.06	1779.92	1586.38	1762.99	2041.38	1695.9	1918.41	2019.76	2250.71
VIT_14s0068g01490	1241.06	1509.71	1432.17	1121.97	973.673	636.816	1169.98	1295.58	1375.6	1400.75	874.019	751.196	701.43	639.135	595.82	1568.33	989.555	1101.52
VIT_14s0068g01500	1992.96	1430.63	1184.31	1333.97	863.011	890.112	1161.85	1181.39	1032.29	1319.01	868.522	1927.08	1141.59	546.455	1216.24	993.861	1126.61	1130.93
VIT_14s0068g01510	123.5	140.907	128.574	150.866	115.273	107.329	124.726	100.544	92.9138	106.511	126.43	118.299	98.8593	116.754	116.158	137.449	116.145	75.0573
VIT_14s0068g01530	2455.48	2422.73	2240.05	1918.38	2404.6	2509.34	2150.17	2311.79	2286.62	2441.09	2453.85	2364.79	2612.71	2032.96	2293.09	2276.72	2183.52	2254.76
VIT_14s0068g01540	296.643	215.674	252.148	273.941	223.63	191.76	223.693	348.313	305.513	287.333	262.755	207.022	196.542	257.58	113.424	323.064	173.056	290.086
VIT_14s0068g01550	121.079	142.345	129.288	104.812	117.579	130.225	126.082	147.943	146.457	125.089	113.238	95.8218	87.0903	139.623	98.3923	118.652	142.858	131.857
VIT_14s0068g01560	975.896	895.764	1071.45	1039.39	951.387	925.172	679.891	1096.65	960.634	894.201	1008.15	865.945	795.582	1036.34	807.636	960.968	934.967	1092.39
VIT_14s0068g01590	1342.76	1354.43	1374.31	1226.78	1352.54	1524.07	1329.96	1291.99	1463	1343.78	1293.99	1399.47	1569.98	1198.83	1514.15	1217.07	1364.7	1305.39
VIT_14s0068g01630	221.574	225.738	232.148	267.589	219.787	227.537	246.74	258.541	251.97	220.454	215.481	274.453	330.708	216.656	286.977	270.199	225.321	260.672
VIT_14s0068g01640	1846.45	2553.57	1858.61	1758.78	1514.69	1483.28	1740.74	1583.57	1400.79	1673.22	1562.24	1522.5	1529.96	2000.46	1586.58	1629.42	1548.21	1564.03
VIT_14s0068g01650	5711.29	3879.25	5236.54	3192.01	5712.16	6392.49	4277.28	6617.94	6430.74	5567.08	5457.4	4547.39	5466.68	5665.55	5295.42	6531.76	6242.79	7004.67
VIT_14s0068g01660	88.3876	123.653	117.145	110.37	142.17	112.337	88.1215	146.507	102.363	105.273	117.635	125.396	105.921	113.143	118.891	131.575	138.212	133.886
VIT_14s0068g01670	404.403	313.446	334.293	422.425	436.501	364.917	357.909	461.065	396.852	408.707	391.385	485.024	464.874	339.428	489.228	405.298	285.717	366.158
VIT_14s0068g01690	765.219	736.166	902.876	939.339	801.532	771.335	779.537	747.615	829.925	930.117	1004.85	702.693	714.376	990.599	705.145	995.036	858.311	959.517
VIT_14s0068g01710	1890.04	1958.32	2026.47	1796.1	1829	1887.55	1797	1959.89	2151.98	1840.42	2000.9	1628.97	1927.76	1868.06	1947.35	1927.81	2024.41	2070.16
VIT_14s0068g01720	67.8042	57.5129	75.7159	80.1972	73.0063	80.8542	71.1751	69.6625	57.4806	59.4482	59.3673	133.677	85.9134	40.9239	117.524	61.0884	72.0099	69.9859
VIT_14s0068g01730	365.658	452.914	350.007	365.254	275.118	375.65	284.022	275.777	333.072	346.781	321.023	443.619	381.314	320.169	368.971	290.17	324.044	309.358
VIT_14s0068g01760	10825.7	10046.1	10128.1	9382.28	8318.87	8134.07	9277.84	8706.38	7574.84	9723.5	8131.13	13785.3	10773.3	5519.91	11581.6	7560.86	7879.27	9310.15
VIT_14s0068g01770	7.26473	23.0052	20.0004	13.4985	14.6013	17.1726	25.0807	20.1088	26.7718	17.3391	27.4849	13.0128	8.23827	6.01822	8.19935	11.7478	15.0988	17.2429
VIT_14s0068g01780	26.6374	7.18912	34.2864	41.2896	26.897	32.9141	29.1479	26.5723	28.3466	29.7241	10.994	22.4767	14.1228	24.0729	38.2637	21.146	23.229	38.5429
ENSRNA049470309	50.8531	61.8264	51.4296	68.2867	26.1286	52.9488	52.1951	37.3448	42.5199	39.6322	60.4667	56.7833	43.5451	36.1093	36.8971	50.5154	39.4893	35.5001
VIT_14s0068g01790	7.26473	8.62694	2.1429	10.3224	2.30546	5.00867	5.42286	0.71817	2.36222	4.95402	5.49698	39.0385	16.4765	2.40729	2.73312	1.17478	9.29159	2.02858
VIT_14s0068g01800	180.408	184.041	172.861	253.296	129.874	136.665	164.042	194.624	144.883	158.529	162.71	172.716	200.072	121.568	161.254	172.692	130.082	143.015
VIT_14s0068g01820	13.3187	18.6917	7.85731	20.6448	13.8328	20.7502	14.235	17.2361	11.0237	11.1465	19.7891	21.2937	27.0686	12.0364	9.56591	9.39822	17.4217	19.2715
VIT_14s0068g01830	221.574	294.754	279.292	391.458	241.305	258.304	257.586	263.568	196.064	227.885	219.879	417.594	250.679	272.024	286.977	260.8	210.222	200.829
VIT_14s0068g01840	1991.75	3230.79	2100.04	2446.41	1666.08	1896.14	1980.7	1685.55	1438.59	1581.57	2084.45	2089.15	1991.31	2345.9	1604.34	1564.8	1710.81	1511.29
VIT_14s0068g01850	54.4855	57.5129	37.8579	71.4628	35.3504	72.2679	29.8257	47.3992	29.134	33.4396	42.8764	66.2472	48.2527	50.5531	32.7974	46.9911	30.1977	38.5429
VIT_14s0068g01860	15.7403	40.2591	14.286	26.9971	16.1382	17.8881	16.2686	9.33621	18.8977	13.6236	12.0933	26.0257	18.8303	26.4802	27.3312	16.4469	15.0988	5.07144
VIT_14s0068g01870	1376.67	1746.96	1558.6	1599.97	1549.27	1826.02	1416.72	1213.71	1330.71	1160.48	1184.05	2751.62	2666.85	902.733	2509	898.704	1157.96	919.959
VIT_14s0068g01890	1122.4	1035.23	1595.75	1126.73	872.233	1531.22	856.134	1412.64	1380.32	948.695	907.001	1129.75	843.834	949.675	957.958	1090.19	902.446	899.674
VIT_14s0068g01930	328.124	386.775	300.721	359.696	298.173	269.752	246.062	293.732	286.615	289.81	319.924	320.589	307.17	278.042	323.875	280.772	276.425	312.401
VIT_14s0068g01940	2651.63	4136.62	2647.91	3887.58	2376.93	2533.67	3113.4	2369.96	2073.24	2645.45	2715.51	3301.71	2810.43	2739.49	2912.14	2262.62	2214.88	2225.35
VIT_14s0068g01950	352.34	406.904	360.722	384.311	346.588	292.649	317.915	241.305	231.497	298.48	332.017	470.828	380.137	267.209	463.264	224.382	328.69	222.129
VIT_14s0068g01960	2137.04	2017.27	2216.47	1872.33	2202.48	2560.86	1960.36	2124.35	2315.76	2073.26	2351.61	2477.17	2193.73	2356.74	2321.78	2089.93	2018.6	1946.42
VIT_14s0068g01970	96.8631	67.5777	63.5728	73.0509	76.8487	63.6816	88.7994	85.4622	37.008	68.1178	64.8643	141.958	108.274	49.3494	68.328	51.6902	59.2339	80.1288
VIT_14s0068g01990	16.951	30.1943	15.7146	13.4985	21.5176	20.7502	28.47	17.9543	18.1103	28.4856	26.3855	4.73194	22.361	18.0547	10.9325	19.9712	33.682	38.5429
VIT_14s0068g02000	29.0589	92.0207	19.2861	38.1135	57.6365	28.621	48.1279	57.4536	16.5355	52.0172	47.274	20.1107	29.4224	54.164	17.7653	30.5442	23.229	26.3715
VIT_14s0068g02010	39.956	25.8808	43.5723	39.7016	33.0449	33.6296	30.5036	63.9171	34.6458	54.4942	40.6776	47.3194	23.5379	32.4984	46.463	35.2433	49.9423	52.743
VIT_14s0068g02020	565.438	687.28	651.442	657.458	490.295	596.031	568.045	518.519	548.821	516.457	614.562	619.884	546.08	578.953	542.524	572.116	613.245	537.573
VIT_14s0068g02030	3001.55	3998.59	3329.36	3238.85	2283.18	2807.72	2579.93	2699.6	2628.36	2811.41	2645.14	2601.38	2342.02	2924.86	2589.63	2875.85	2516.86	2799.44
VIT_14s0068g02040	1611.56	2033.08	1411.46	1736.55	1522.37	1455.38	1790.9	1493.08	1486.62	1435.43	1389.64	1892.78	1775.94	1650.2	1624.84	1581.25	1411.16	1432.17
VIT_14s0068g02050	167.089	254.495	171.432	289.821	136.022	152.407	283.345	116.344	148.82	191.968	169.307	256.708	236.556	197.398	218.649	133.925	157.957	119.686
VIT_14s0068g02060	1357.29	1939.62	1278.6	1614.27	1062.82	1089.03	1500.78	1079.41	1083.47	1345.02	1306.08	1213.74	1122.76	1304.75	1124.68	1153.63	1099.89	1158.32
VIT_14s0068g02070	802.753	708.847	658.585	759.888	653.214	699.782	755.134	738.279	785.83	748.057	824.546	748.83	703.784	718.576	658.682	721.313	801.4	775.93
VIT_14s0068g02080	29.0589	5.75129	25.7148	25.409	29.971	33.6296	21.0136	26.5723	9.44886	27.2471	15.3915	28.3916	23.5379	38.5166	20.4984	23.4955	23.229	22.3143
VIT_14s0068g02090	20.5834	31.6321	40.7151	50.818	24.5916	22.1812	39.9936	16.5179	33.071	24.7701	29.6837	14.1958	21.1841	27.6838	27.3312	19.9712	24.3904	27.3858
VIT_14s0068g02110	1366.98	1728.26	1412.17	1457.84	1358.69	1364.5	1523.15	1303.48	1186.62	1478.77	1457.8	1800.5	1619.41	1493.72	1639.87	1155.98	1347.28	1336.83
VIT_14s0068g02120	1138.14	950.401	865.732	891.697	787.699	992.431	1047.97	821.587	805.515	949.933	1014.74	883.69	1126.29	706.539	711.977	687.245	777.01	795.202
VIT_14s0068g02130	819.704	658.523	817.874	626.491	674.732	839.309	764.624	731.097	674.806	775.304	727.8	700.327	767.336	734.223	717.444	758.906	737.52	787.088
VIT_14s0068g02140	1754.43	1696.63	1780.04	1603.15	1821.31	1883.26	1942.06	1885.2	1887.41	1798.31	1853.58	1705.86	1830.07	1781.39	1716.4	1815.03	1988.4	1988
VIT_14s0068g02150	10062.9	6392.56	10097.4	6943.81	7280.65	7369.89	8002.79	9421.67	9630.75	7791.43	7114.19	7361.72	7246.15	5209.37	7603.54	9102.17	7836.3	10821.4
VIT_14s0068g02160	177.986	261.684	182.147	228.681	192.122	165.286	214.203	122.807	118.111	194.445	186.897	322.955	307.17	188.972	235.048	116.303	176.54	142
VIT_14s0068g02190	515.796	547.811	750.73	490.711	384.244	616.782	450.098	512.055	729.924	418.615	338.614	971.231	529.603	308.133	841.8	479.309	549.366	447.301
VIT_14s0068g02200	101.706	175.414	190.718	111.958	129.106	148.113	137.605	118.498	170.867	113.942	118.735	167.984	164.765	161.288	215.916	155.071	184.67	155.186
VIT_14s0068g02240	181.618	113.588	118.574	124.663	135.254	88.0094	131.504	173.079	148.032	99.0804	145.12	62.6982	55.3141	91.477	131.19	198.537	114.983	128.815
VIT_14s0171g00040	19.3726	17.2539	13.5717	14.2926	32.2765	29.3365	10.8457	12.2089	11.8111	19.8161	18.6897	37.8555	47.0758	18.0547	30.0643	19.9712	17.4217	23.3286
VIT_14s0171g00080	270.006	300.505	298.578	352.55	172.141	227.537	285.378	214.733	196.851	240.27	280.346	371.457	284.809	190.176	296.543	182.09	260.165	190.686
VIT_14s0171g00090	1555.86	1388.94	1434.32	1208.52	1261.86	1608.5	1361.82	1341.54	1299.22	1345.02	1436.91	1737.81	1680.61	1279.47	1742.36	1312.23	1777.02	1603.59
VIT_14s0171g00100	4157.85	4915.92	4624.38	3874.87	2413.82	3682.8	3140.52	2736.95	2916.55	2691.27	3231.12	2956.28	3536.57	2932.08	2570.5	2653.82	2531.96	3068.22
VIT_14s0171g00120	3014.86	4156.75	3345.78	4280.62	3475.87	3547.57	4048.85	2907.15	2759.07	3500.02	3499.37	5530.46	4374.52	2999.48	4795.26	2820.64	3231.15	2825.81
VIT_14s0171g00130	340.232	402.591	374.294	360.49	408.835	339.158	345.03	378.476	369.293	288.572	316.626	380.921	430.744	332.206	446.865	406.473	418.122	418.901
VIT_14s0171g00140	280.903	251.619	391.437	302.526	298.941	292.649	269.11	344.722	330.71	281.141	326.52	304.027	243.617	308.133	315.675	394.725	391.408	359.058
VIT_14s0171g00150	324.491	263.122	330.007	337.463	212.102	228.252	310.459	320.304	340.159	273.71	258.358	353.713	298.932	190.176	276.045	250.227	211.384	245.458
VIT_14s0171g00160	1513.49	2565.08	1455.74	2272.52	1593.07	1666.45	1643.81	1449.99	1398.43	1794.59	1487.48	2686.56	2090.17	1735.66	1937.78	1376.84	1450.65	956.474
VIT_14s0171g00170	462.521	296.192	553.583	318.407	496.443	511.6	406.715	561.609	464.569	478.063	565.089	357.261	388.376	548.862	423.633	567.417	442.512	618.716
VIT_14s0171g00180	223.996	278.938	152.86	202.478	413.446	328.425	313.848	201.806	212.599	261.325	324.322	274.453	510.773	243.136	295.177	204.411	197.446	144.029
VIT_14s0171g00190	415.301	470.168	429.295	497.064	406.53	416.435	477.89	407.202	441.734	418.615	404.577	481.475	402.498	509.142	415.434	444.066	436.705	410.787
VIT_14s0171g00220	406.825	375.272	426.437	382.723	395.771	291.218	410.104	358.367	336.222	356.689	414.472	253.159	337.769	403.221	270.579	394.725	411.153	335.729
VIT_14s0171g00230	244.579	284.689	245.719	248.532	274.35	254.726	227.082	231.251	255.119	258.848	302.334	184.546	197.719	286.467	184.485	286.646	267.133	265.743
VIT_14s0171g00240	15.7403	31.6321	24.2862	15.0866	26.897	19.3191	21.0136	27.2905	20.4725	32.2011	21.9879	23.6597	12.9459	26.4802	21.8649	34.0685	34.8435	16.2286
VIT_14s0171g00250	244.579	293.316	241.434	356.52	229.778	246.14	292.157	224.069	250.395	246.462	253.96	274.453	227.141	213.045	252.813	236.13	222.998	195.758
VIT_14s0171g00260	2255.7	2664.29	2255.76	2398.77	1794.42	1944.08	2433.51	1765.98	1926.78	1859	2147.12	1967.3	2026.61	2430.16	2088.1	2013.57	1936.14	1897.73
VIT_14s0171g00270	2488.17	2464.43	2437.91	2771.96	1979.62	2317.58	2282.35	2301.02	2280.32	2163.67	2542.9	2192.07	2329.08	2749.12	2305.39	2338.98	2344.97	2568.18
VIT_14s0171g00280	4546.51	3233.67	4542.95	2602.04	4557.9	4985.77	4151.2	5253.41	5189.79	4275.32	4271.15	3651.87	3984.97	4706.25	4193.97	5110.28	4405.38	5385.87
VIT_14s0171g00300	33.9021	48.886	24.2862	35.7314	37.6559	70.1213	25.7586	34.4722	40.1577	42.1092	31.8825	40.2215	32.9531	26.4802	28.6977	30.5442	36.0049	24.3429
VIT_14s0171g00310	997.69	1157.45	1111.45	1003.66	984.432	1079.73	736.832	1074.38	1092.13	873.146	989.456	951.12	888.556	1119.39	1070.02	1037.33	1089.44	1001.1
VIT_14s0171g00320	1748.38	1455.08	1236.45	1256.16	1253.4	1100.48	1218.11	1158.41	910.24	1489.92	1443.51	965.316	1271.05	1178.37	737.942	1307.53	1180.03	1319.59
VIT_14s0171g00330	1575.24	1897.93	1730.04	2059.72	1444.76	1521.2	1529.25	1505.28	1410.24	1463.91	1468.79	1496.48	1488.77	1668.25	1306.43	1511.94	1385.61	1407.83
VIT_14s0171g00340	803.964	887.137	1002.16	1037.01	743.127	1023.2	827.664	971.684	862.996	984.611	845.435	968.865	849.719	959.305	933.36	864.636	753.781	961.545
VIT_14s0171g00350	36.3237	28.7565	9.28591	11.9105	53.0256	58.673	27.7922	79.7169	47.2443	40.8707	43.9758	14.1958	28.2455	37.313	25.9646	58.7388	63.8797	91.2859
VIT_14s0171g00360	1195.05	1072.62	1025.74	841.673	1005.18	916.586	1026.28	1070.07	1012.6	1013.1	1013.64	755.927	905.033	943.657	769.373	1151.28	1097.57	1119.77
VIT_14s0171g00370	119.868	110.712	115.717	96.8718	79.9227	109.475	129.471	101.262	104.725	107.75	118.735	82.809	107.098	96.2916	90.1929	76.3605	110.338	100.415
VIT_14s0171g00380	2729.12	2395.41	2325.05	2436.09	2985.57	2653.16	3006.98	2898.53	2562.22	2765.58	2673.73	3563.15	3066.99	2479.51	3229.18	2915.8	2969.83	2952.59
VIT_14s0171g00390	193.726	218.549	200.004	235.033	163.688	175.303	188.444	199.651	163.78	132.52	186.897	212.937	207.134	191.379	143.489	155.071	197.446	184.6
VIT_14s0171g00400	5774.25	7173.3	6876.57	5424.03	6136.37	5136.03	5243.23	7223.36	7282.71	7751.8	5614.61	6964.23	5461.97	4502.83	6120.82	6867.75	5945.46	6308.87
VIT_14s0171g00410	3851.52	5246.62	4280.09	5228.7	3584.22	6006.82	3013.76	4272.39	4645.69	5165.8	4569.09	4769.8	4819.39	4071.93	3840.03	3873.24	4320.59	3940.51
VIT_14s0171g00420	416.511	531.995	434.295	462.92	395.002	353.469	385.023	366.985	314.175	374.029	434.261	383.287	382.491	467.014	411.334	373.579	401.861	403.687
VIT_14s0171g00430	1831.92	1899.36	2117.9	1730.99	1750.61	1528.36	1641.09	1680.52	1588.2	1679.41	1742.54	1359.25	1376.97	1880.09	1321.46	1800.93	1653.9	1618.8
VIT_14s0171g00440	30.2697	44.5725	37.8579	42.0837	36.1189	25.7589	50.1615	29.445	36.2206	34.6781	31.8825	46.1364	57.6679	42.1276	53.2958	38.7676	25.5519	25.3572
VIT_14s0171g00450	1222.9	1039.55	1143.6	1024.3	1393.27	1452.51	1113.72	1322.15	1499.22	1222.4	1193.94	1235.04	1425.22	1192.81	1525.08	1333.37	1458.78	1473.76
VIT_14s0171g00460	2453.06	2647.03	2215.76	2356.69	2113.34	2069.29	2481.64	2166	2169.3	2306.1	2276.85	2248.85	2247.87	2404.88	2231.59	2266.14	2196.3	2084.36
VIT_14s0171g00470	925.043	1196.27	1410.74	1715.9	958.303	1144.84	1289.29	1062.89	963.784	1238.5	1250.01	1171.16	970.939	1174.76	921.061	972.715	960.519	1099.49
VIT_14s0171g00480	2051.08	1665	2020.04	1337.15	2167.9	2258.19	1869.53	2378.58	2140.17	2429.95	2226.28	1795.77	1790.06	2321.83	1771.06	2235.6	2133.58	2432.26
VIT_14s0171g00490	5965.56	6228.65	6646.57	6355.43	6211.68	5992.51	6034.97	6550.43	6625.23	5837.07	5847.68	8170.88	6272.86	5823.23	7788.02	6189.9	6489.02	6238.89
VIT_14s0171g00500	116.236	47.4482	60.7155	75.433	140.633	77.9921	46.7722	141.48	103.15	84.2183	59.3673	146.69	101.213	93.8843	116.158	92.8074	76.6557	147.072
VIT_14s0171g00510	2549.92	3026.62	2302.91	3218.21	2333.13	2258.91	2445.03	2234.95	2114.97	2511.69	2580.28	3166.85	2540.92	2206.28	2582.8	2145.14	2080.16	2299.39
VIT_14s0171g00520	2961.59	2544.95	2954.35	2253.46	2591.34	3133.28	2426.73	3312.2	3459.07	2760.63	2824.35	2455.88	2746.87	3012.72	2450.24	2942.82	3296.19	3486.11
VIT_14s0171g00530	2629.83	2324.96	2625.05	1901.71	2987.11	3393.73	2060.69	3283.47	3249.62	2858.47	2844.14	2134.11	2816.31	2750.33	2750.88	3053.25	2856	3309.62
VIT_14s0219g00010	1593.4	1603.17	1840.75	2100.21	1475.5	1702.95	1732.6	1691.29	1745.68	1948.17	1752.44	1527.23	1568.8	1584	1529.18	1584.77	1636.48	1619.82
VIT_14s0219g00020	944.415	982.034	961.449	793.237	823.05	906.569	838.51	866.831	892.917	937.548	935.585	712.157	832.065	937.639	690.112	960.968	868.764	944.302
VIT_14s0219g00030	39.956	30.1943	35.0007	65.9046	30.7395	20.0347	37.2822	35.1903	37.7954	38.3937	30.7831	39.0385	50.6065	42.1276	42.3633	31.719	39.4893	48.6858
VIT_14s0219g00040	1353.66	1611.8	1551.46	1603.15	1972.71	1748.02	1405.88	1495.95	1470.87	1451.53	1267.6	2564.71	2018.38	1084.48	2432.48	1316.92	1408.84	1620.83
VIT_14s0219g00060	53.2747	80.5181	61.4299	68.2867	48.4147	66.5437	57.6179	59.6081	44.8821	44.5862	53.8704	37.8555	49.4296	57.7749	31.4309	46.9911	37.1664	73.0287
VIT_14s0219g00070	249.422	257.37	217.862	217.565	181.363	201.062	210.136	208.988	199.213	208.069	191.295	176.265	201.249	216.656	180.386	223.208	190.478	210.972
VIT_14s0219g00080	542.433	477.357	512.154	394.634	657.056	555.246	515.85	539.346	599.215	497.879	659.637	450.717	556.672	534.418	486.495	613.234	637.636	592.344
VIT_14s0219g00090	16.951	30.1943	22.8576	29.3792	31.508	12.1639	26.4365	16.5179	33.071	38.3937	16.4909	23.6597	16.4765	20.462	34.164	30.5442	25.5519	28.4001
VIT_14s0219g00110	6995.94	8741.97	6803	8308.75	7354.42	7106.58	9641.85	6579.16	5869.32	7839.74	7450.6	10840.9	7626.29	7605.83	8289.55	7031.04	6640.01	6250.04
VIT_14s0219g00120	2828.4	4307.72	2797.92	4085.29	2413.82	2929.35	2628.73	2367.09	2300.8	2770.54	2579.18	4300.15	3571.88	2298.96	3494.29	2122.82	2383.29	2071.18
VIT_14s0219g00140	487.948	592.383	455.724	435.129	429.584	471.53	452.809	387.094	422.049	450.816	439.758	432.973	415.444	473.032	427.733	432.318	427.413	414.844
VIT_14s0219g00150	9070.02	10549.3	9235.19	9923.81	8568.63	8160.55	8109.89	8622.35	7702.4	8290.55	8266.35	8814.42	8284.17	9769.98	8336.01	8340.92	8238.16	7713.66
VIT_14s0219g00170	485.526	573.692	525.011	593.936	476.462	507.306	513.816	421.566	467.719	559.804	571.686	500.403	559.026	447.756	500.161	507.504	508.715	458.458
VIT_14s0219g00180	13.3187	12.9404	26.4291	35.7314	29.2025	33.6296	28.47	21.5451	19.6851	23.5316	27.4849	30.7576	34.13	16.851	38.2637	11.7478	24.3904	33.4715
VIT_14s0219g00190	2181.84	2301.96	2509.34	2321.75	2232.45	2638.14	2290.48	2451.83	2489.77	2287.52	2193.29	2343.49	2539.74	2326.64	2668.89	2193.31	2232.31	2307.51
VIT_14s0219g00200	302.697	362.332	377.865	360.49	371.948	344.167	324.694	350.467	376.38	382.698	345.21	346.615	364.838	316.558	349.839	306.617	347.273	317.472
VIT_14s0219g00210	115.025	175.414	109.288	182.627	151.392	130.225	294.19	103.416	125.197	143.667	236.37	101.737	161.235	179.343	116.158	122.177	94.0774	106.5
VIT_14s0219g00220	213.099	330.699	220.719	161.982	276.655	188.898	267.754	163.025	192.914	272.471	228.674	201.107	289.516	209.434	196.785	199.712	264.81	174.458
VIT_14s0219g00250	543.644	654.21	538.583	598.7	370.411	487.987	560.588	450.293	451.97	502.833	515.616	425.875	450.751	488.68	266.479	462.862	456.45	462.515
VIT_14s0219g00290	277.271	270.311	267.148	315.23	292.794	259.735	300.291	244.896	274.017	288.572	304.532	250.793	234.202	332.206	273.312	263.15	284.555	289.072
VIT_14s0066g00140	1127.24	1509.71	1067.88	1203.75	1237.26	1042.52	1173.37	1040.63	971.658	1291.76	1126.88	1524.87	1388.74	1161.52	1326.93	1011.48	1085.96	1057.9
VIT_14s0066g00150	135.608	158.161	118.574	134.985	123.726	98.7423	131.504	119.934	83.4649	89.1724	124.232	138.409	123.574	123.975	81.9935	110.429	126.598	117.657
VIT_14s0066g00170	510.953	373.834	582.869	621.727	443.417	488.703	464.333	545.809	551.184	491.686	423.267	741.732	536.665	548.862	613.585	474.61	464.58	628.859
VIT_14s0066g00180	1657.57	1731.14	1579.32	1592.03	1332.56	1408.15	1203.2	1421.26	1563.79	1451.53	1507.27	1349.79	1340.48	1361.32	1307.8	1576.55	1314.76	1518.39
VIT_14s0066g00190	39.956	31.6321	54.2868	65.9046	16.1382	40.0693	32.5372	28.7268	42.5199	48.3017	25.2861	18.9278	18.8303	14.4437	31.4309	45.8163	39.4893	48.6858
VIT_14s0066g00200	263.952	263.122	243.577	259.648	238.999	249.002	306.392	234.842	229.922	214.261	303.433	172.716	183.596	270.82	187.219	250.227	254.357	207.929
VIT_14s0066g00210	250.633	355.142	249.291	272.353	224.398	260.451	320.627	253.514	267.718	256.371	258.358	179.814	249.502	251.562	310.209	257.276	254.357	243.429
VIT_14s0066g00220	1312.5	1515.47	1487.89	1287.13	1795.95	1448.22	1485.19	1483.74	1497.64	1540.7	1697.47	1744.9	1771.23	1555.11	1840.76	1416.78	1536.6	1246.56
VIT_14s0066g00240	61.7502	63.2642	50.7153	49.23	43.8038	40.0693	41.3493	41.6539	52.7561	73.0718	47.274	48.5024	25.8917	61.3859	23.2315	41.1172	60.3954	63.9001
VIT_14s0066g00250	173.143	523.368	220.005	287.439	223.63	244.709	172.854	174.515	175.591	232.839	117.635	292.197	285.986	161.288	262.379	213.809	174.217	118.672
VIT_14s0066g00260	1065.49	1150.26	1146.45	1069.56	975.979	1043.95	1297.42	1007.59	933.862	1088.65	1023.54	1109.64	939.163	1188	1029.02	1031.45	1081.31	1058.92
VIT_14s0066g00270	722.841	657.085	681.443	600.288	738.516	696.92	774.792	744.742	824.413	748.057	726.7	526.428	555.495	794.405	557.556	818.82	746.812	751.587
VIT_14s0066g00290	2283.55	2194.12	2380.05	2963.33	2104.89	2435.64	2449.78	2289.53	2342.53	2368.02	2142.72	3275.69	2515.03	1769.36	2682.56	2105.2	2315.93	2145.22
VIT_14s0066g00310	812.439	836.813	837.16	685.249	733.905	764.179	835.799	784.242	868.508	774.066	751.986	603.322	692.015	830.515	709.244	734.236	802.561	829.688
VIT_14s0066g00320	393.506	299.067	352.15	333.493	378.864	342.02	376.889	342.567	321.261	391.368	403.478	233.048	357.776	341.835	289.711	338.336	332.174	313.415
VIT_14s0066g00330	92.02	186.917	96.4306	145.308	98.3663	67.9748	128.115	91.9258	100.788	82.9798	84.6534	111.201	90.621	123.975	103.858	105.73	73.1713	80.1288
VIT_14s0066g00340	569.071	501.8	541.44	508.974	409.604	427.168	473.145	414.384	537.01	421.092	364.999	566.65	397.791	339.428	505.627	445.24	441.351	478.744
VIT_14s0066g00350	134.398	148.096	130.003	200.89	145.244	163.139	180.988	155.125	138.583	142.428	162.71	185.729	162.412	174.528	158.521	163.294	140.535	128.815
VIT_14s0066g00360	449.203	307.694	387.865	372.401	371.179	315.546	418.916	402.175	397.64	345.543	406.776	238.963	276.571	416.461	232.315	427.619	419.283	404.701
VIT_14s0066g00370	1185.36	1503.96	1101.45	1264.89	1239.57	1078.29	1041.19	1246.03	1207.09	1470.11	1115.89	1081.25	1202.79	1096.52	1059.08	1070.22	1039.5	1030.52
VIT_14s0066g00390	432.252	622.578	437.866	441.482	345.051	399.262	477.212	359.803	379.529	400.037	389.186	356.079	380.137	427.294	353.939	382.977	463.418	343.844
VIT_14s0066g00400	42.3776	40.2591	44.2866	64.3165	104.514	37.2072	62.3629	44.5265	38.5828	47.0632	62.6655	251.976	124.751	66.2004	204.984	32.8938	65.0412	19.2715
VIT_14s0066g00410	1276.17	1524.09	1435.03	1587.27	1304.89	1710.1	1461.46	1132.55	1255.12	1460.2	1430.31	2057.21	1992.48	1580.39	1840.76	1234.69	1493.62	1306.4
VIT_14s0066g00420	296.643	255.933	259.291	271.559	373.485	342.02	303.68	339.694	362.994	282.379	334.216	281.55	354.246	287.671	306.109	344.21	339.143	323.558
VIT_14s0066g00450	4404.85	5646.33	4362.95	4464.84	3548.1	4447.7	4402.01	3884.58	3828.36	4205.96	3685.17	4726.03	4343.92	4635.23	4750.16	4193.95	3991.9	4069.32
VIT_14s0066g00460	1484.43	1496.77	1585.75	1560.27	1571.56	2276.08	1424.18	1578.54	1783.47	1686.84	1583.13	2128.19	2218.45	1592.42	1831.19	1382.71	1478.52	1290.17
VIT_14s0066g00470	33.9021	38.8212	34.2864	30.1732	27.6655	30.7675	27.7922	25.8541	22.8347	29.7241	23.0873	34.3066	23.5379	31.2948	15.0322	27.0199	33.682	15.2143
VIT_14s0066g00480	526.693	566.502	528.582	508.18	503.359	558.824	521.951	527.137	502.364	522.649	595.872	522.879	535.488	473.032	493.328	520.426	578.402	474.687
VIT_14s0066g00490	260.32	301.943	336.436	239.003	384.244	337.727	368.755	339.694	355.12	345.543	352.906	396.3	377.784	332.206	452.331	371.23	413.476	312.401
VIT_14s0066g00500	23.005	34.5078	19.2861	12.7045	45.3407	44.3625	20.3357	39.4994	38.5828	26.0086	29.6837	34.3066	55.3141	38.5166	32.7974	41.1172	49.9423	34.4858
VIT_14s0066g00540	49.6423	43.1347	31.4292	23.8209	84.5336	50.0867	35.9265	40.2175	62.205	39.6322	52.771	31.9406	55.3141	58.9786	84.7267	74.0109	67.3641	63.9001
VIT_14s0066g00550	55.6963	44.5725	37.1436	23.0269	44.5722	34.3451	41.3493	29.445	30.7088	49.5402	59.3673	52.0513	50.6065	36.1093	72.4276	41.1172	61.5568	32.4572
VIT_14s0066g00560	722.841	1072.62	656.442	985.393	574.828	578.143	703.616	584.59	438.585	769.112	694.818	1180.62	885.026	677.652	841.8	600.311	627.183	568.001
VIT_14s0066g00580	595.708	621.14	695.729	566.938	552.542	603.902	576.179	680.825	657.483	601.913	639.848	499.22	581.387	646.357	537.058	622.632	643.443	674.502
VIT_14s0066g00590	2197.58	2162.49	2629.34	2169.29	2238.6	2462.12	2657.2	2594.75	2377.18	2325.91	2531.91	2244.12	2456.18	2047.4	2129.1	2328.41	2284.57	2613.82
VIT_14s0066g00600	25.4266	7.18912	35.715	45.2598	31.508	19.3191	28.47	18.6724	9.44886	22.2931	17.5903	34.3066	34.13	34.9057	34.164	18.7964	18.5832	13.1857
VIT_14s0066g00610	9040.96	4708.87	8209.46	5801.99	9336.35	11021.2	8416.28	10336.6	10417.4	8532.06	9623.01	10211.5	11530	7723.79	12169.2	9728.33	10918.8	14570.2
VIT_14s0066g00640	1679.36	1370.25	1539.32	1286.33	1852.05	1549.11	1476.37	1707.09	1570.09	1593.96	1575.43	1548.53	1500.54	1550.29	1571.54	1722.22	1616.74	1640.1
VIT_14s0066g00660	98.0739	113.588	126.431	138.161	92.2184	118.777	113.88	91.2076	105.512	81.7413	95.6474	101.737	114.159	86.6624	135.289	90.4578	109.176	93.3145
VIT_14s0066g00670	371.712	326.386	380.008	248.532	312.774	374.934	269.787	333.949	455.908	287.333	268.252	298.112	297.755	332.206	296.543	313.665	379.794	378.329
VIT_14s0066g00700	3197.69	5331.45	3918.65	3497.71	2247.82	2802.71	2024.76	3019.19	2699.22	2766.82	2862.83	2140.02	2026.61	3009.11	1757.4	3375.13	2462.27	3068.22
VIT_14s0066g00710	49.6423	18.6917	70.7158	38.9075	43.0353	37.2072	45.4165	48.1174	59.0554	34.6781	61.5661	48.5024	49.4296	26.4802	28.6977	50.5154	44.1351	92.3002
VIT_14s0066g00720	230.05	219.987	220.719	210.418	228.241	227.537	201.324	226.942	205.513	209.307	274.849	230.682	236.556	298.504	207.717	243.179	268.295	240.386
VIT_14s0066g00730	106.549	31.6321	55.7154	26.203	82.9966	99.4578	54.9065	108.444	100	52.0172	83.554	46.1364	78.852	155.27	61.4952	99.856	126.598	132.872
VIT_14s0066g00740	191.305	112.15	181.432	171.511	159.845	172.441	234.539	178.824	173.229	182.06	202.289	152.605	174.181	219.063	163.987	200.887	197.446	239.372
VIT_14s0066g00780	16.951	30.1943	20.0004	22.2329	23.0546	15.7415	16.2686	17.2361	25.9844	26.0086	27.4849	11.8299	28.2455	32.4984	17.7653	28.1946	51.1038	29.4144
VIT_14s0066g00790	2482.12	2159.61	2460.05	1971.58	2587.5	2857.8	2382.67	2950.24	2967.73	2683.84	2750.69	2435.77	2511.5	2654.04	2645.66	2893.48	2837.42	3182.84
VIT_14s0066g00800	18884.7	16060.5	19768.3	21167.3	19296.7	18600	14308.9	19538.5	17652	18775.7	17646.4	27479.6	19577.7	16664.5	19679.8	17283.3	16807.3	17888
VIT_14s0066g00810	823.336	1236.53	1187.88	899.638	2295.47	1066.13	1401.81	881.195	1123.63	1008.14	871.82	1769.75	1823.01	698.114	1637.14	1133.66	1196.29	913.874
VIT_14s0066g00820	330.545	411.218	322.864	352.55	304.321	362.055	315.882	332.513	413.388	348.02	325.421	314.674	227.141	408.035	308.842	352.433	322.883	304.286
VIT_14s0066g00830	181.618	178.29	170.718	138.956	153.697	135.95	180.988	124.962	129.922	132.52	148.418	172.716	177.711	164.899	131.19	173.867	147.504	134.9
VIT_14s0066g00840	282.114	257.37	222.862	254.884	198.27	212.511	244.029	209.706	171.654	205.592	233.072	217.669	218.903	211.841	199.518	191.489	233.451	207.929
VIT_14s0066g00850	148.927	102.085	125.717	246.15	181.363	210.364	115.914	137.889	159.056	196.922	135.226	425.875	378.96	111.939	453.698	105.73	169.572	124.757
VIT_14s0066g00860	31.4805	23.0052	27.1434	25.409	23.8231	39.3538	34.5708	37.3448	24.4096	35.9166	40.6776	31.9406	51.7834	22.8692	25.9646	19.9712	38.3278	45.643
VIT_14s0066g00870	285.746	159.598	206.433	147.69	198.27	226.821	210.814	191.033	240.946	232.839	267.153	204.656	221.256	197.398	274.678	227.907	240.42	230.243
VIT_14s0066g00880	95.6523	38.8212	62.8585	48.4359	60.7105	67.2592	71.1751	88.3349	77.1657	44.5862	68.1625	35.4896	62.3755	56.5713	51.9292	72.8362	68.5255	90.2716
VIT_14s0066g00900	78.7013	79.0803	44.2866	50.818	96.0609	40.7849	61.0072	69.6625	66.9294	70.5948	51.6716	44.9534	56.491	63.7932	45.0965	70.4866	44.1351	54.7716
VIT_14s0066g00920	199.78	143.782	220.719	134.985	243.61	204.64	202.68	249.205	233.072	205.592	209.984	127.762	221.256	276.838	127.09	254.927	210.222	237.343
VIT_14s0066g00950	1583.71	1555.73	1594.32	1532.48	1488.56	1567.71	1464.85	1463.63	1447.25	1281.85	1486.38	1446.79	1324.01	1598.44	1497.75	1486.09	1470.39	1689.8
VIT_14s0066g00960	3706.22	6887.17	3542.93	4408.46	3243.78	3016.65	4177.64	2800.15	2918.12	3321.67	3093.7	5267.83	4001.45	3381.04	4091.48	3140.18	3213.73	2117.83
VIT_14s0066g00970	35.1129	46.0104	52.1439	54.7882	51.4886	54.3798	48.8058	36.6267	31.4962	28.4856	47.274	59.1493	51.7834	37.313	46.463	29.3694	36.0049	49.7001
VIT_14s0066g00980	168.3	169.663	172.146	208.83	170.604	131.656	134.894	147.225	194.489	188.253	170.406	205.839	178.888	201.009	154.421	165.644	148.666	198.8
VIT_14s0066g00990	169.51	171.101	193.575	235.827	189.816	206.786	195.223	164.461	213.387	185.776	174.804	177.448	160.058	188.972	177.653	179.741	180.025	169.386
VIT_14s0066g01020	16839.7	15445.1	16791.8	13672.4	18648.9	19138.1	17221.7	19121.3	18864.6	19215.4	17042.8	22422.3	20513.3	16675.3	21341.6	17917.7	20704	18418.5
VIT_14s0066g01030	266.374	242.992	277.149	320.789	280.498	276.192	246.062	269.314	293.702	267.517	246.265	344.249	295.401	270.82	371.704	327.763	295.008	268.786
VIT_14s0066g01040	326.913	337.889	312.149	284.263	294.331	326.279	294.19	317.431	302.364	331.919	334.216	338.334	333.062	285.264	405.868	283.121	348.435	286.029
VIT_14s0066g01050	79.9121	80.5181	70.0015	110.37	81.4596	77.2766	84.7322	89.7713	99.213	87.9339	103.343	93.4558	84.7365	90.2733	80.627	75.1857	84.7858	55.7858
VIT_14s0066g01060	136.819	127.966	146.432	196.126	98.3663	178.881	98.2894	135.016	116.536	136.236	117.635	273.27	161.235	163.696	161.254	113.953	111.499	138.957
VIT_14s0066g01070	1627.3	1417.69	1768.61	1957.29	1590.77	2008.48	1642.45	1883.76	1848.04	1863.95	1534.76	2674.73	2051.33	1577.98	2271.22	1460.25	1745.66	1907.88
VIT_14s0066g01080	25083.9	31788.8	27683.4	32743.5	20325.7	24325.7	28863.2	23511.5	23695.4	23716.1	23413.8	32756.9	25279.7	24141.5	28580.2	22199.8	23551.9	22626.7
VIT_14s0066g01090	2269.02	1554.29	2809.34	2627.45	2200.95	1881.83	2828.7	2384.32	2060.64	2073.26	3608.22	1630.15	1209.85	2958.56	1706.83	2670.27	3545.9	3637.24
VIT_14s0066g01100	339.021	324.948	352.864	403.368	373.485	348.46	387.057	341.849	362.206	386.414	381.49	343.066	375.43	337.02	282.878	283.121	378.632	356.015
VIT_14s0066g01110	1130.88	1391.81	1237.17	1468.96	1360.99	1283.65	1573.99	1143.33	1045.67	1328.92	1310.48	1820.61	1625.29	1230.12	1464.95	1066.7	1205.58	1052.83
VIT_14s0066g01120	4050.09	2670.04	3694.36	2899.8	3493.54	4031.98	3131.03	4179.75	4318.92	3855.47	3420.22	3553.69	3728.41	3425.57	3477.89	3890.86	4076.69	4569.37
VIT_14s0066g01130	617.502	1071.18	622.87	801.972	663.204	690.48	777.503	630.553	585.042	720.81	629.953	845.834	704.961	677.652	673.714	549.796	570.272	485.844
VIT_14s0066g01140	346.286	606.762	490.01	520.885	385.012	478.685	450.775	474.71	347.246	440.908	547.499	312.308	287.163	649.968	218.649	442.891	361.211	322.544
ENSRNA049470252	81.1229	99.2098	115.717	154.836	64.5529	84.4318	105.068	96.953	78.7405	102.796	113.238	63.8812	49.4296	86.6624	35.5305	95.1569	84.7858	84.1859
VIT_14s0066g01150	2631.04	2802.32	2163.62	2310.63	2122.56	1504.75	3015.79	1983.59	2246.47	2584.76	2283.44	3344.3	2853.97	935.232	2197.43	2064.08	1950.07	1807.46
VIT_14s0066g01160	159.824	191.231	157.146	213.594	133.717	147.398	152.518	127.834	93.7012	126.328	137.424	171.533	115.336	164.899	159.887	124.526	95.2388	128.815
VIT_14s0066g01170	3106.88	2825.32	3077.92	2496.43	3073.95	3200.54	2723.63	3265.52	3444.9	3002.14	3216.83	3072.21	3194.1	2934.49	3328.94	3036.8	3112.68	3383.66
VIT_14s0066g01180	1012.22	1107.12	1065.02	908.372	1279.53	1310.84	923.92	1031.29	1191.34	1011.86	1098.3	1576.92	1657.07	1018.28	1545.58	862.286	1193.97	930.102
VIT_14s0066g01190	5432.81	5616.14	4717.24	7571.88	4747.71	4263.81	6263.41	5710.89	4409.47	6896	5015.44	5455.93	5165.4	4458.3	4349.76	6120.59	3842.07	5009.57
VIT_14s0066g01200	1190.21	1312.73	1296.46	1414.17	1335.63	1427.47	1300.81	1471.53	1441.74	1429.23	1511.67	1232.67	1053.32	1609.27	1246.3	1484.92	1413.48	1510.27
VIT_14s0066g01210	262.741	386.775	276.434	404.162	325.07	304.813	357.909	257.823	229.135	401.276	341.912	302.844	483.704	217.86	345.739	314.84	276.425	238.358
VIT_14s0066g01220	8.47552	23.0052	16.4289	19.0568	28.434	14.3105	20.3357	20.1088	21.2599	26.0086	27.4849	41.4045	24.7148	8.42551	24.5981	17.6217	17.4217	21.3
VIT_14s0066g01230	468.575	530.557	451.438	492.3	604.799	509.453	519.239	488.356	491.341	453.293	471.641	542.99	418.975	544.047	476.929	492.232	515.683	480.773
VIT_14s0066g01240	903.248	950.401	855.018	830.557	1186.54	794.231	1015.43	1039.91	988.193	911.54	866.323	1222.02	1245.16	653.579	1384.32	1121.91	1052.27	896.631
VIT_14s0066g01280	27.8481	40.2591	30.0006	34.9374	36.1189	55.0953	27.7922	30.8813	49.6065	37.1551	21.9879	67.4301	62.3755	27.6838	57.3955	35.2433	26.7133	26.3715
VIT_14s0066g01290	26.6374	37.3834	32.8578	63.5225	50.7201	54.3798	50.8393	35.9085	34.6458	64.4023	38.4788	57.9663	62.3755	51.7567	72.4276	38.7676	33.682	36.5144
VIT_14s0066g01300	216.731	250.181	249.291	345.404	233.62	262.597	236.572	275.777	257.481	248.94	237.469	250.793	281.278	226.285	229.582	243.179	177.702	209.958
VIT_14s0066g01310	420.144	606.762	530.011	391.458	495.674	538.074	476.534	522.11	559.058	398.799	504.622	556.003	494.296	652.375	546.624	514.552	502.908	466.573
VIT_14s0066g01320	5408.59	8369.57	6220.13	6084.66	5646.84	5747.8	5838.39	4606.34	5084.27	4770.72	4742.79	9241.48	7179.06	5604.17	7592.6	4524.07	5569.15	4494.31
VIT_14s0066g01330	106.549	135.155	136.431	78.6091	129.874	136.665	128.793	141.48	148.032	90.4109	123.132	111.201	114.159	133.605	159.887	125.701	114.983	127.8
VIT_14s0066g01340	9809.81	15945.5	10501.6	10323.2	9414.73	10167.6	10808.4	9604.81	10183.5	11019	9851.68	11113	11137	10263.5	9686.17	10085.5	9590.09	8446.99
VIT_14s0066g01350	2143.1	3850.49	2615.77	3153.89	2102.58	2312.57	3004.94	2140.87	2101.58	2015.05	2351.61	2899.5	2685.68	2206.28	2370.98	2057.03	2089.45	1721.25
VIT_14s0066g01360	60.5394	34.5078	69.2872	47.6419	43.0353	70.1213	54.2286	53.8628	59.8428	35.9166	35.1806	55.6003	69.4369	39.7203	77.8939	43.4667	49.9423	56.8001
VIT_14s0066g01370	334.178	231.49	305.721	310.466	285.109	278.339	314.526	236.278	282.678	222.931	306.731	299.295	322.469	264.802	285.611	287.82	284.555	378.329
VIT_14s0066g01380	94.4415	138.031	74.2873	125.457	96.0609	89.4405	88.7994	84.7441	62.9924	65.6408	80.2559	104.103	110.628	105.921	122.99	62.2632	77.8171	51.7287
VIT_14s0066g01390	547.277	513.303	516.439	596.318	484.915	630.376	559.911	546.527	625.987	546.181	664.035	461.364	409.56	891.901	547.99	594.437	620.214	596.401
VIT_14s0066g01400	193.726	242.992	182.861	242.974	274.35	232.545	301.647	203.96	163.78	213.023	185.798	354.896	346.007	228.692	370.338	187.964	226.483	156.2
VIT_14s0066g01410	83.5444	83.3938	90.7162	96.0778	99.9033	109.475	88.1215	72.5352	100.788	91.6494	68.1625	166.801	122.397	97.4952	179.019	81.0596	104.53	69.9859
VIT_14s0066g01420	16.951	28.7565	18.5718	27.7911	38.4244	14.3105	30.5036	15.7997	11.8111	12.385	15.3915	85.1749	55.3141	8.42551	35.5305	7.04866	18.5832	10.1429
VIT_14s0066g01430	79.9121	54.6373	61.4299	69.8748	63.0159	66.5437	64.3965	78.2805	87.402	81.7413	70.3613	54.4173	49.4296	103.513	61.4952	103.38	90.593	86.2145
VIT_14s0066g01440	3861.21	4701.68	4068.66	5949.68	4043.78	4593.66	5003.27	3904.69	3922.85	4733.57	3746.74	7858.57	4569.89	5084.19	5135.53	4075.3	3984.93	3790.39
VIT_14s0066g01450	2735.17	1833.23	2545.05	1738.93	2958.68	2897.87	2009.85	3276.29	3342.53	2764.34	2750.69	2308	2506.79	2605.89	2662.06	3269.4	3530.81	4010.5
VIT_14s0066g01460	731.316	1048.17	853.589	956.808	748.506	683.325	798.517	730.379	679.531	821.129	845.435	647.093	679.069	905.141	746.141	747.158	646.927	799.259
VIT_14s0066g01530	2335.61	3478.1	2610.77	3078.46	2117.18	2464.26	3349.3	2321.13	2349.62	2801.5	2349.41	2720.87	2432.64	2509.6	2672.99	2412.99	2440.2	2104.65
VIT_14s0066g01540	131.976	57.5129	137.146	200.096	113.736	176.019	144.384	98.3893	144.095	142.428	103.343	237.78	163.589	71.015	176.286	86.9335	138.212	167.358
VIT_14s0066g01550	4674.86	3713.9	3938.65	3828.82	3036.29	3894.6	3620.44	3573.61	3921.28	3661.02	3402.63	3299.35	2866.92	3556.77	3164.95	3654.73	3526.16	4240.74
VIT_14s0066g01560	150.138	104.961	122.86	108.782	138.328	131.656	119.981	130.707	137.008	146.144	108.84	158.52	150.643	90.2733	180.386	128.051	168.41	131.857
VIT_14s0066g01570	79.9121	171.101	100.002	55.5822	116.042	51.5177	122.014	86.8986	61.4176	56.9712	74.7589	93.4558	96.5055	55.3676	73.7942	93.9822	77.8171	37.5287
VIT_14s0066g01580	1595.82	1273.91	2078.61	1530.89	1717.57	1855.35	2175.92	2072.64	2140.17	1607.58	1768.93	1982.68	1884.21	1488.91	2375.08	1792.71	1889.68	2166.52
VIT_14s0066g01590	21.7942	15.8161	20.0004	22.2329	21.5176	17.1726	32.5372	15.0816	15.7481	23.5316	12.0933	42.5875	27.0686	14.4437	24.5981	19.9712	19.7446	18.2572
VIT_14s0066g01600	675.62	1567.23	735.015	1187.08	717.767	916.586	839.188	662.871	601.577	958.603	747.589	1468.08	1166.3	928.01	1108.28	562.718	709.646	564.958
VIT_14s0066g01610	656.248	1012.23	690.729	805.148	590.967	697.636	706.328	635.581	628.349	702.232	603.568	882.507	686.13	755.889	686.013	682.545	557.496	593.359
VIT_14s0066g01620	508.531	815.246	552.154	721.775	445.722	442.194	542.964	446.702	411.813	506.549	518.915	520.513	534.311	448.959	511.093	438.192	443.674	406.73
VIT_14s0066g01630	1135.72	774.987	1050.74	913.136	1277.99	1136.97	1231.67	1356.62	1277.17	1245.94	1156.56	1024.47	950.932	1352.9	1013.99	1312.23	1281.08	1466.66
VIT_14s0066g01640	7.26473	14.3782	5.0001	7.94031	16.9067	9.30181	10.8457	17.9543	7.87405	11.1465	16.4909	15.3788	12.9459	20.462	36.8971	3.52433	6.9687	4.05715
VIT_14s0066g01650	594.497	833.938	564.297	697.954	509.507	565.264	457.554	488.356	442.522	511.503	647.544	476.743	566.087	651.172	420.9	479.309	447.158	514.244
VIT_14s0066g01660	1121.19	1028.04	982.163	983.805	1078.19	1026.06	934.088	938.648	1034.65	1040.34	1093.9	1191.27	1060.38	1085.69	1154.74	1026.76	1204.42	998.059
VIT_14s0066g01670	23.005	41.6969	12.1431	5.55822	3.84244	44.3625	14.9129	10.7726	7.87405	35.9166	34.0813	31.9406	22.361	0	10.9325	9.39822	59.2339	10.1429
VIT_14s0066g01700	632.032	572.254	587.869	751.154	546.394	508.737	604.649	594.645	495.278	584.574	548.598	541.807	546.08	630.71	476.929	590.913	523.814	563.944
VIT_14s0066g01710	2765.44	2002.89	2797.92	2311.43	1747.54	2255.33	2056.62	2672.31	2360.64	2694.99	2154.81	2080.87	1720.62	1851.21	1713.67	2301.39	1993.05	2650.33
VIT_14s0066g01720	12388.8	9102.86	13339.6	7977.63	13109.6	14839.2	10435.6	14862.5	15407.2	11800.5	12635.3	11907.9	13074.1	12256.7	14000.4	14100.8	15317.2	16358.4
VIT_14s0066g01730	33.9021	21.5674	33.5721	46.0538	26.1286	42.9314	30.5036	39.4994	20.4725	29.7241	26.3855	75.711	22.361	28.8875	62.8617	34.0685	24.3904	30.4286
VIT_14s0066g01740	238.525	404.028	297.149	393.046	255.906	272.615	302.325	259.978	233.859	307.149	248.463	267.355	230.672	316.558	240.514	298.393	247.389	250.529
VIT_14s0066g01750	441.938	485.984	455.724	490.711	464.935	428.599	504.326	406.484	407.088	428.523	509.02	428.241	454.282	499.512	445.498	522.776	498.262	474.687
VIT_14s0066g01780	204.623	165.35	190.718	181.039	190.585	166.717	233.861	155.125	170.867	134.997	200.09	166.801	210.664	201.009	222.749	166.818	173.056	170.4
VIT_14s0066g01790	20.5834	17.2539	16.4289	18.2627	23.0546	14.3105	13.5572	20.1088	11.0237	9.90804	19.7891	16.5618	14.1228	15.6474	12.299	29.3694	25.5519	13.1857
VIT_14s0066g01800	399.56	207.047	307.864	196.126	330.449	427.168	217.592	409.357	412.6	357.928	355.105	327.687	344.83	362.297	378.537	395.9	475.033	438.172
VIT_14s0066g01810	85.966	70.4534	102.145	108.782	87.6075	70.1213	77.2758	117.062	96.8508	102.796	85.7528	88.7239	92.9748	121.568	83.3601	69.3118	81.3014	85.2002
VIT_14s0066g01820	29.0589	34.5078	35.0007	28.5851	31.508	21.4657	29.8257	34.4722	30.7088	58.2097	30.7831	34.3066	41.1914	32.4984	17.7653	34.0685	17.4217	21.3
VIT_14s0066g01830	16.951	14.3782	20.7147	24.615	17.6752	12.1639	8.81215	12.9271	21.2599	30.9626	23.0873	20.1107	8.23827	19.2583	13.6656	11.7478	8.13014	16.2286
VIT_14s0066g01850	16.951	0	3.5715	22.2329	9.22184	7.15524	10.1679	7.89987	7.87405	16.1006	4.39758	24.8427	4.70758	19.2583	13.6656	17.6217	2.3229	18.2572
VIT_14s0066g01870	146.505	171.101	199.29	223.123	242.842	224.674	193.189	223.351	218.899	222.931	269.352	185.729	210.664	249.154	206.35	229.082	256.68	204.886
VIT_14s0066g01880	1046.12	631.205	399.294	807.53	979.821	475.108	1184.22	542.937	365.356	720.81	828.944	1107.27	732.029	725.798	512.46	661.399	411.153	551.773
VIT_14s0066g01890	1057.02	1015.1	1047.16	1286.33	925.258	985.992	1147.61	1050.68	1052.76	1175.34	981.76	997.256	903.856	956.897	960.691	1024.41	979.102	1020.37
VIT_14s0066g01900	265.163	337.889	284.292	420.043	289.72	280.485	327.405	249.923	255.907	235.316	322.123	337.151	301.285	284.06	388.103	290.17	304.3	209.958
VIT_14s0066g01910	992.847	716.036	817.874	688.425	1043.61	943.776	850.034	1006.16	993.705	791.405	968.567	820.992	849.719	982.174	903.296	999.735	1042.98	1289.16
VIT_14s0066g01920	4230.5	5161.79	4185.8	4543.45	3349.07	3809.45	4248.81	3544.17	3456.71	3467.81	3440.01	4333.27	4073.24	3618.16	3677.41	3141.35	3378.66	3705.19
VIT_14s0066g01930	777.326	879.948	860.732	701.924	733.905	780.636	726.664	843.85	837.012	912.778	808.055	664.838	807.351	742.649	576.688	814.12	657.38	675.516
VIT_14s0066g01940	78.7013	86.2694	92.8591	98.4599	67.6269	80.8542	89.4772	84.7441	77.9531	63.1638	80.2559	75.711	57.6679	96.2916	54.6624	75.1857	62.7183	63.9001
VIT_14s0066g01950	187.672	104.961	190.004	127.045	109.894	145.967	111.169	175.234	135.434	91.6494	123.132	114.75	209.487	151.659	143.489	158.595	245.066	204.886
VIT_14s0066g02030	1288.28	1179.02	1373.6	1029.86	1396.34	1573.44	1062.88	1572.79	1543.31	1442.86	1553.45	1355.7	1394.62	1523.81	1198.47	1442.63	1462.26	1455.5
VIT_14s0066g02060	151.349	110.712	70.7158	84.9614	138.328	74.4145	187.089	210.424	155.119	178.345	114.337	79.26	76.4982	66.2004	80.627	132.75	123.114	105.486
VIT_14s0066g02090	9.68631	12.9404	15.7146	6.35225	24.5916	0.715524	25.0807	22.9814	16.5355	29.7241	12.0933	17.7448	8.23827	10.8328	6.8328	23.4955	29.0362	15.2143
VIT_14s0066g02120	67.8042	35.9456	32.1435	29.3792	33.0449	25.0433	45.4165	25.8541	26.7718	42.1092	35.1806	16.5618	16.4765	40.9239	17.7653	32.8938	24.3904	46.6573
VIT_14s0066g02170	639.297	670.026	480.01	541.529	442.649	463.659	627.696	473.992	407.088	561.043	548.598	454.266	559.026	438.127	474.196	418.221	475.033	423.972
VIT_14s0066g02180	37.5345	37.3834	60.7155	37.3195	39.1928	44.3625	39.9936	45.9629	23.6222	45.8247	46.1746	42.5875	20.0072	43.3312	46.463	37.5929	48.7809	43.6144
VIT_14s0066g02190	2511.18	2090.6	2058.61	2466.26	1754.46	1830.31	1901.39	2315.38	2177.96	2411.37	1860.18	1853.74	1800.65	1718.8	1592.04	2091.1	1612.09	2113.78
VIT_14s0066g02200	940.783	961.904	901.447	779.739	791.542	920.164	793.094	983.175	907.091	868.192	813.552	952.303	814.412	843.755	828.135	876.384	879.217	953.431
VIT_14s0066g02210	123.5	81.9559	105.002	46.0538	146.781	157.415	92.1887	193.188	159.056	122.612	175.903	86.3579	78.852	220.267	105.225	152.721	161.441	189.672
VIT_14s0066g02220	129.554	83.3938	125.003	67.4927	110.662	136.665	93.5444	155.843	176.379	115.181	141.822	49.6854	84.7365	160.085	68.328	158.595	121.952	154.172
VIT_14s0066g02230	429.83	339.326	482.867	440.687	432.658	471.53	415.527	577.409	496.853	469.393	447.454	308.759	303.639	581.36	374.437	471.086	430.898	520.33
VIT_14s0066g02240	853.606	785.052	907.876	925.047	783.857	845.749	773.436	872.577	826.775	822.367	772.875	964.133	794.405	919.584	796.704	847.014	765.395	801.288
VIT_14s0066g02250	593.287	700.22	596.441	555.028	736.211	528.057	679.214	621.217	648.034	692.324	653.041	611.603	663.769	539.233	543.891	706.041	753.781	600.459
VIT_14s0066g02260	276.06	300.505	244.291	293.792	317.385	320.555	295.546	247.769	261.418	302.195	255.06	384.47	317.762	259.987	303.376	239.655	276.425	230.243
VIT_14s0066g02290	31.4805	11.5026	20.7147	27.7911	14.6013	14.3105	9.49001	20.8269	27.5592	22.2931	18.6897	18.9278	21.1841	25.2765	20.4984	7.04866	19.7446	20.2858
VIT_14s0066g02320	36.3237	57.5129	20.7147	42.8777	49.1832	32.1986	58.2958	39.4994	28.3466	64.4023	28.5843	79.26	109.451	16.851	56.0289	54.0397	16.2603	25.3572
VIT_14s0066g02330	5511.51	4297.65	5386.54	3634.28	5950.4	6312.35	5359.82	6633.74	6714.2	5669.88	5326.57	5325.8	5763.26	5462.14	6208.28	6077.12	6484.37	6993.52
VIT_14s0066g02340	995.268	845.44	815.017	945.691	878.381	772.05	993.062	812.969	688.979	868.192	969.667	838.736	819.12	948.472	765.273	848.189	875.733	815.488
VIT_14s0066g02350	698.625	484.547	457.152	502.622	447.259	376.366	501.615	522.11	553.546	688.609	469.442	441.253	535.488	285.264	349.839	520.426	348.435	461.501
VIT_14s0066g02360	604.184	678.653	547.869	596.318	551.005	547.376	608.716	512.773	543.309	657.646	637.649	696.778	649.647	511.549	546.624	512.203	612.084	553.801
VIT_14s0066g02370	59.3287	77.6425	78.5731	57.9643	66.8584	78.7076	48.8058	48.8356	55.9058	65.6408	47.274	89.9069	81.2058	58.9786	91.5595	59.9136	58.0725	51.7287
VIT_14s0066g02380	3640.84	3470.91	3360.07	2642.54	2864.92	3065.3	3043.58	3068.02	3014.19	3134.66	2949.68	2936.17	3142.31	3166.79	2924.44	3345.76	3153.33	3376.56
VIT_14s0066g02390	2943.43	2590.96	3076.49	2407.5	3310.64	3330.05	2548.75	3326.56	3507.1	3119.79	3070.61	2797.76	3014.03	2861.06	3037.86	3338.72	3378.66	3325.85
VIT_14s0066g02400	828.18	851.192	827.16	837.703	721.609	762.033	700.227	742.588	659.845	790.166	770.676	668.387	673.184	923.195	635.45	741.284	729.39	736.373
VIT_14s0066g02410	859.66	1065.43	777.873	979.835	697.018	967.388	760.557	674.362	860.634	835.991	794.863	1043.39	917.979	901.53	870.498	643.778	811.853	719.13
VIT_14s0066g02440	1583.71	1654.93	1653.61	1578.53	1792.11	1607.07	1244.55	1619.47	1548.83	1522.12	1649.09	1683.39	1838.31	1500.94	1741	1495.49	1701.52	1460.57
VIT_14s0066g02450	20.5834	23.0052	24.2862	26.203	27.6655	15.7415	27.1143	20.8269	22.8347	22.2931	19.7891	23.6597	47.0758	42.1276	16.3987	21.146	33.682	14.2
VIT_14s0066g02470	520.639	326.386	286.435	419.249	465.703	311.253	395.191	551.555	358.269	604.39	358.403	495.671	360.13	267.209	378.537	440.541	249.712	368.187
VIT_14s0066g02510	35.1129	17.2539	25.7148	23.8209	12.2958	21.4657	22.3693	16.5179	22.0473	12.385	25.2861	13.0128	10.5921	20.462	19.1318	18.7964	17.4217	11.1572
VIT_14s0066g02530	29.0589	20.1295	15.7146	27.7911	22.2861	19.3191	19.6579	12.2089	13.3859	21.0546	9.89456	23.6597	22.361	6.01822	23.2315	18.7964	26.7133	20.2858
VIT_14s0066g02540	2790.87	1765.65	2604.34	1667.47	2771.16	3149.02	2023.41	3290.66	3360.64	2740.81	2349.41	2354.14	2724.51	2375.99	2720.82	2821.81	3262.51	3367.44
VIT_14s0066g02550	1699.95	1791.53	1780.75	1582.5	1653.78	1949.8	1903.42	2061.15	2225.21	1653.4	1740.34	1204.28	1342.84	2152.12	1459.49	2125.17	1878.06	1693.86
VIT_14s0066g02560	3191.64	4570.84	3065.06	3975.72	2270.11	2712.55	3957.33	2630.66	2420.48	3502.49	2847.43	3291.06	2356.15	2876.71	2451.61	2545.74	2779.35	2352.13
VIT_14s0066g02590	23.005	25.8808	16.4289	33.3493	17.6752	29.3365	16.9464	20.1088	21.2599	12.385	19.7891	16.5618	18.8303	31.2948	27.3312	16.4469	20.9061	17.2429
VIT_14s0066g02600	238.525	296.192	279.292	323.965	278.192	312.684	272.499	284.395	318.899	299.718	313.328	237.78	229.495	385.166	281.511	270.199	245.066	277.915
VIT_14s0066g02610	145.295	99.2098	112.145	127.839	82.9966	78.7076	96.9337	109.88	112.599	131.282	108.84	97.0048	74.1444	98.6988	65.5948	153.896	72.0099	76.0716
VIT_14s0066g02620	571.492	475.92	595.727	563.762	455.713	476.539	641.254	570.945	552.758	539.988	565.089	389.202	435.451	653.579	412.701	535.698	542.397	591.33
VIT_14s0066g02630	472.208	506.114	351.436	487.535	441.112	467.237	560.588	412.23	411.813	492.925	412.273	469.645	460.166	480.254	437.299	505.154	439.028	367.172
VIT_14s0108g00010	1209.58	1585.92	1443.6	1671.44	1250.33	1344.47	1328.6	1321.43	1347.25	1347.49	1236.82	1769.75	1256.92	1438.36	1661.74	1315.75	1351.93	1169.47
VIT_14s0108g00030	70.2258	86.2694	82.8589	123.075	126.8	98.0268	85.4101	68.9443	80.3153	121.373	96.7468	227.133	109.451	129.994	165.354	81.0596	87.1087	78.1002
VIT_14s0108g00040	7303.48	6700.26	7323.01	6340.34	7231.46	7322.67	8009.57	7749.77	7704.76	7717.12	7452.8	7579.39	6379.95	8177.56	7216.8	7967.34	8151.05	8358.75
VIT_14s0108g00050	94.4415	44.5725	75.0016	97.6659	69.9323	84.4318	102.357	81.8714	85.0397	97.8419	98.9456	95.8218	68.26	51.7567	76.5273	89.2831	73.1713	86.2145
VIT_14s0108g00060	1124.82	930.272	1310.03	1147.38	1019.78	1247.16	976.115	1409.77	1491.35	1110.94	1258.81	1007.9	975.647	1162.72	1016.72	1177.13	1373.99	1293.22
VIT_14s0108g00070	203.413	208.484	247.862	262.824	232.083	222.528	269.787	229.096	273.23	235.316	296.837	251.976	243.617	323.78	273.312	278.422	277.586	270.815
VIT_14s0108g00080	4494.45	5330.01	5031.53	4555.36	4440.32	4647.33	4517.24	4306.15	4163.01	4477.2	4641.65	4121.52	4389.82	4719.49	4401.69	4519.37	4325.24	4453.74
VIT_14s0108g00090	2124.93	1135.88	1268.6	1215.66	1154.27	1136.97	1281.15	1312.81	888.193	1650.93	1715.06	1061.14	1219.26	1362.53	795.337	1354.52	1207.91	1642.13
VIT_14s0108g00100	67.8042	28.7565	40.7151	53.2001	40.7298	48.6556	59.6515	46.6811	34.6458	50.7787	42.8764	56.7833	61.1986	36.1093	32.7974	55.2145	38.3278	55.7858
VIT_14s0108g00110	267.584	392.526	293.578	352.55	305.858	259.735	231.15	260.696	293.702	263.802	250.662	383.287	287.163	303.318	337.54	256.101	303.138	237.343
VIT_14s0108g00120	16.951	7.18912	12.1431	14.2926	9.99033	8.58629	10.8457	19.3906	11.8111	27.2471	10.994	43.7704	11.769	20.462	20.4984	17.6217	26.7133	23.3286
VIT_14s0108g00130	484.316	536.308	480.01	462.92	636.307	550.953	514.494	492.665	457.482	523.888	577.182	506.318	571.971	627.099	543.891	562.718	570.272	498.015
VIT_14s0108g00140	10054.4	13039.6	11360.2	17416.3	10263.9	12330.6	11524.9	10426.4	10448.9	11312.5	11180.8	17203	11568.9	11776.5	13664.2	10100.7	10623.8	10279.8
VIT_14s0108g00150	280.903	178.29	176.432	212.006	239.768	241.132	319.271	288.704	203.938	196.922	295.737	262.623	213.018	388.777	291.077	281.946	221.837	300.229
VIT_14s0108g00160	31.4805	5.75129	17.8575	7.14628	21.5176	31.483	12.2014	38.063	19.6851	23.5316	14.2921	15.3788	22.361	44.5348	9.56591	29.3694	19.7446	55.7858
VIT_14s0108g00170	15.7403	4.31347	20.7147	6.35225	2.30546	4.29314	14.235	7.89987	11.8111	4.95402	8.79516	5.91493	3.53069	6.01822	8.19935	10.573	16.2603	28.4001
VIT_14s0108g00270	104.128	166.788	84.2875	60.3464	84.5336	55.0953	88.1215	47.3992	59.8428	65.6408	56.0692	53.2343	109.451	64.9968	112.058	89.2831	70.8484	52.743
VIT_14s0108g00350	32.6913	47.4482	35.715	36.5254	62.2475	57.9574	51.5172	42.372	39.3703	34.6781	54.9698	35.4896	41.1914	55.3676	35.5305	38.7676	54.5881	47.6715
VIT_14s0108g00360	10.8971	5.75129	15.7146	11.1164	19.2122	20.0347	10.8457	13.6452	7.08665	12.385	20.8885	16.5618	23.5379	24.0729	8.19935	14.0973	23.229	26.3715
VIT_14s0108g00370	31.4805	28.7565	33.5721	73.0509	35.3504	32.1986	44.0608	43.8084	38.5828	47.0632	47.274	28.3916	31.7762	46.9421	43.7299	43.4667	39.4893	37.5287
VIT_14s0108g00380	102.917	122.215	102.859	115.135	99.1348	138.096	98.2894	124.962	101.575	128.805	136.325	82.809	103.567	157.677	109.325	124.526	138.212	116.643
VIT_14s0108g00400	81.1229	73.329	101.431	115.135	71.4693	74.4145	103.712	128.552	120.473	168.437	70.3613	67.4301	63.5524	57.7749	45.0965	105.73	74.3328	77.0859
VIT_14s0108g00430	191.305	299.067	202.147	198.508	328.144	354.9	275.21	208.988	222.048	247.701	227.575	417.594	539.018	181.75	408.601	218.509	292.685	184.6
VIT_14s0108g00450	3422.9	2762.06	2462.91	2394.8	1882.02	2153.73	3078.15	2186.11	1854.34	2474.53	2246.06	2141.2	2502.08	1929.44	1904.98	2384.8	2127.78	2623.96
VIT_14s0108g00460	3391.42	5084.14	3660.08	3972.54	3191.53	3337.92	3288.29	2718.99	2609.46	3243.64	3127.78	4508.36	4132.08	3649.45	3651.45	3146.05	2970.99	2676.71
VIT_14s0108g00470	301.486	202.733	269.291	223.917	294.331	288.356	271.143	429.466	382.679	281.141	272.65	261.44	290.693	322.577	310.209	379.453	364.695	414.844
VIT_14s0108g00480	1228.95	1887.86	1532.89	2036.69	1043.61	1486.14	1144.9	1400.43	1521.27	1452.77	1317.08	1522.5	1331.07	1493.72	1310.53	1383.89	1217.2	1321.62
VIT_14s0108g00490	7361.6	6304.86	7065.15	6317.31	8328.86	9422.02	8076	8397.56	7860.66	8151.84	7194.44	10121.6	8986.78	6556.25	10021	7697.14	8401.92	8842.56
VIT_14s0108g00500	1334.29	917.331	1486.46	1162.46	1375.59	1622.09	1309.62	1605.11	1737.8	1533.27	1357.75	1191.27	1225.15	1238.55	1356.99	1624.72	1639.97	1765.88
VIT_14s0108g00510	2457.9	2648.47	2122.19	2360.66	2320.06	2055.7	2099.33	2136.56	1962.21	2346.97	2309.83	2619.13	2409.11	2451.82	1986.98	2120.47	1988.4	2099.58
VIT_14s0108g00520	36.3237	53.1995	358.579	355.726	182.131	48.6556	92.8665	61.0445	173.229	82.9798	48.3734	429.424	774.397	276.838	434.566	22.3208	54.5881	20.2858
VIT_14s0108g00540	653.826	506.114	777.159	434.335	610.947	388.529	611.428	640.608	729.924	579.62	397.981	612.786	533.134	357.482	787.138	556.844	645.766	588.287
VIT_14s0108g00560	93.2307	40.2591	87.1447	94.4897	102.977	66.5437	70.4972	75.4079	99.213	115.181	90.1504	72.1621	52.9603	144.437	65.5948	90.4578	90.593	91.2859
VIT_14s0108g00570	289.379	153.847	315.007	227.887	238.999	249.718	208.78	327.486	338.584	234.077	279.246	133.677	109.451	285.264	131.19	328.938	293.847	361.087
VIT_14s0108g00580	36.3237	24.443	29.2863	31.7613	33.8134	25.0433	39.9936	29.445	35.4332	32.2011	48.3734	37.8555	21.1841	28.8875	39.6302	35.2433	27.8748	37.5287
VIT_14s0108g00590	37.5345	21.5674	27.1434	23.8209	36.1189	35.7762	25.7586	27.2905	25.197	24.7701	29.6837	30.7576	40.0145	16.851	36.8971	31.719	30.1977	23.3286
VIT_14s0108g00600	44.7992	37.3834	42.1437	31.7613	33.0449	38.6383	44.0608	36.6267	33.8584	16.1006	36.28	36.6725	37.6607	44.5348	27.3312	36.4181	48.7809	26.3715
VIT_14s0108g00630	823.336	544.935	885.733	717.01	298.173	427.168	679.214	598.954	739.373	266.279	326.52	603.322	324.823	215.452	351.206	731.886	457.611	742.459
VIT_14s0108g00730	395.928	299.067	373.579	301.732	325.839	295.511	337.573	354.058	374.017	331.919	347.409	260.257	244.794	315.355	251.447	421.745	319.399	404.701
VIT_14s0108g00740	48.4316	132.28	72.8587	71.4628	112.199	90.156	69.1415	113.471	66.142	70.5948	75.8583	101.737	100.036	96.2916	68.328	74.0109	54.5881	54.7716
VIT_14s0108g00750	48.4316	90.5829	77.1445	129.427	99.1348	75.13	82.0208	84.0259	69.2916	115.181	94.548	138.409	138.874	109.532	102.492	57.5641	68.5255	58.8287
VIT_14s0108g00760	147.716	340.764	217.147	326.347	218.25	185.321	254.875	188.879	146.457	232.839	240.768	280.367	289.516	323.78	252.813	219.683	227.644	153.157
VIT_14s0108g00800	59.3287	48.886	42.858	75.433	49.9517	48.6556	64.3965	47.3992	47.2443	56.9712	65.9637	70.9791	57.6679	48.1458	47.8296	37.5929	39.4893	46.6573
VIT_14s0108g00810	4910.96	7909.47	5413.68	9078.16	5736.76	6916.97	7691.65	5297.22	5303.96	6587.61	6733.8	9592.83	8557.21	5860.54	7671.86	4544.04	5188.19	4079.47
VIT_14s0108g00830	244.579	557.876	254.291	557.41	430.353	310.537	477.89	386.376	287.403	478.063	462.845	352.53	422.506	414.054	262.379	433.493	274.102	158.229
VIT_14s0108g00840	872.979	609.637	609.298	748.772	694.712	623.221	547.709	704.525	581.105	813.698	721.203	487.39	589.625	592.193	610.852	757.731	579.563	641.03
VIT_14s0108g00850	950.469	1614.68	935.019	1229.16	904.509	945.207	1027.63	854.622	795.279	1057.68	959.772	1426.68	1188.66	1006.25	1119.21	803.547	860.634	647.116
VIT_14s0108g00870	1100.61	1291.17	1128.59	1372.88	1168.1	1145.55	1014.08	1164.87	1112.6	1202.59	1104.89	1081.25	992.123	1395.02	1060.45	1242.91	1111.51	992.988
VIT_14s0108g00890	3150.47	2405.48	2952.92	2240.76	3153.1	2831.33	2928.35	3150.61	3441.75	3099.98	2504.42	3133.73	3129.37	2095.54	3290.67	3083.79	2803.74	2867.39
VIT_14s0108g00930	9.68631	23.0052	10.0002	11.1164	33.8134	11.4484	14.235	12.2089	7.87405	8.66953	26.3855	16.5618	18.8303	16.851	21.8649	12.9225	19.7446	6.08573
VIT_14s0108g00940	684.096	639.831	667.157	511.356	784.625	803.533	733.442	708.116	724.413	776.543	809.155	752.378	820.296	772.74	933.36	753.032	809.53	737.387
VIT_14s0108g00950	3497.97	3685.14	3611.5	3620.78	3834.75	3709.99	3703.14	3762.49	3646.47	3662.26	3657.69	3597.46	3404.76	4206.74	3416.4	3494.96	3715.48	3702.15
VIT_14s0108g00970	3496.76	4782.2	3949.37	4189.31	3387.49	3642.02	4102.4	3205.19	3381.12	3836.89	3593.92	4736.67	4488.68	3578.43	4456.35	3213.02	3615.59	2992.15
VIT_14s0108g00980	4883.11	5138.78	5238.68	5988.59	6255.48	6285.88	4527.41	5431.52	5112.62	5609.19	5356.25	7581.75	6771.86	5342.98	6760.37	4982.23	5443.71	5205.33
VIT_14s0108g00990	305.119	300.505	352.15	546.294	255.138	407.133	420.95	354.776	310.238	273.71	374.894	293.38	273.04	365.908	224.116	360.657	239.259	303.272
VIT_14s0108g01000	764.008	588.07	696.443	805.148	467.24	443.625	843.255	586.745	943.311	736.91	593.673	565.467	500.181	483.865	359.405	898.704	641.12	513.23
VIT_14s0108g01030	2219.38	2359.47	2360.05	2220.91	2247.06	2381.98	1946.81	2309.64	2310.25	2203.3	2232.87	2868.74	2324.37	2620.33	2481.67	2255.57	2282.25	2488.05
VIT_14s0108g01040	2031.7	1777.15	2385.05	1684.14	1875.11	2331.18	1708.88	2211.96	2364.58	1982.85	1916.25	2225.19	1979.54	1851.21	2510.37	2138.09	2210.24	2276.06
VIT_14s0108g01050	283.325	324.948	342.15	285.057	275.118	384.236	247.418	315.995	407.876	307.149	319.924	256.708	245.971	338.224	229.582	313.665	375.148	350.944
VIT_14s0108g01060	519.428	337.889	517.154	308.084	398.845	441.478	420.272	479.738	536.223	442.146	334.216	366.725	324.823	282.856	303.376	468.736	407.669	422.958
VIT_14s0108g01070	2098.3	1840.41	1985.04	2449.59	2014.2	2225.99	2120.34	2073.36	1708.67	2042.29	2329.62	3235.46	2447.94	2672.09	2532.23	1736.32	2069.7	2141.16
VIT_14s0108g01080	18.1618	12.9404	2.8572	7.94031	39.1928	6.43971	20.3357	7.1817	6.29924	21.0546	21.9879	8.2809	14.1228	32.4984	2.73312	27.0199	19.7446	5.07144
VIT_14s0108g01090	21.7942	25.8808	18.5718	27.7911	36.1189	16.457	27.1143	31.5995	20.4725	21.0546	21.9879	24.8427	23.5379	32.4984	16.3987	34.0685	23.229	21.3
VIT_14s0108g01100	234.893	268.873	217.862	284.263	185.974	171.726	216.915	163.025	143.308	195.684	190.195	201.107	227.141	225.082	206.35	182.09	204.415	145.043
VIT_14s0108g01110	4861.32	4990.69	4956.53	5277.93	4900.64	4851.97	5113.76	4548.17	4889.79	4797.97	4595.47	5258.37	4905.3	5151.6	5157.39	4699.11	4799.11	4694.13
VIT_14s0108g01120	756.743	805.181	798.588	787.679	726.989	737.705	680.569	647.789	685.042	662.6	700.315	948.754	784.99	646.357	855.466	547.446	801.4	741.445
VIT_14s0108g01130	54.4855	57.5129	49.2867	54.7882	70.7008	52.9488	46.7722	71.817	66.142	58.2097	57.1686	55.6003	45.8989	84.2551	54.6624	103.38	54.5881	75.0573
VIT_14s0108g01140	1985.69	2276.07	1820.75	1912.82	1463.97	1592.04	1718.37	1425.57	1478.75	1681.89	1664.48	1426.68	1535.85	1550.29	1538.75	1620.02	1563.31	1436.23
VIT_14s0108g01150	43.5884	30.1943	42.1437	35.7314	46.8777	47.2246	51.5172	33.754	48.8191	44.5862	36.28	46.1364	44.722	30.0911	32.7974	41.1172	36.0049	36.5144
VIT_14s0108g01160	17098.8	19314.3	17212.5	17079.6	16797.6	17181.2	19565.7	15697	15297.7	18255.6	16204	24183.8	20974.6	15535.4	20790.8	15320.3	16479.8	14138.2
VIT_14s0108g01170	880.243	954.715	805.017	786.091	832.271	837.163	894.095	775.624	780.318	838.468	908.1	913.264	902.679	859.402	862.299	821.169	903.608	763.759
VIT_14s0108g01180	104.128	97.772	101.431	111.164	109.125	82.2852	94.2222	84.0259	58.268	92.8879	87.9516	115.933	103.567	85.4588	103.858	92.8074	99.8846	99.4002
VIT_14s0108g01190	83.5444	119.339	52.8582	64.3165	69.9323	65.1127	76.5979	72.5352	70.079	60.6867	64.8643	55.6003	52.9603	78.2369	51.9292	58.7388	66.2026	65.9287
VIT_14s0108g01200	733.738	938.899	850.732	1021.12	574.828	731.265	860.202	791.423	776.381	813.698	765.179	585.578	549.61	852.18	538.424	775.353	694.547	738.402
VIT_14s0108g01210	181.618	171.101	190.004	215.183	232.852	204.64	175.565	229.096	219.686	287.333	194.593	199.924	251.856	186.565	248.714	222.033	198.608	129.829
VIT_14s0108g01220	42.3776	20.1295	20.7147	23.8209	16.9067	15.026	18.98	23.6996	34.6458	14.8621	30.7831	18.9278	12.9459	30.0911	23.2315	23.4955	15.0988	21.3
VIT_14s0108g01230	3179.53	3345.82	3211.5	3512	2796.52	3344.36	3040.19	3184.37	3403.16	3062.82	2995.85	3011.88	3026.98	3257.06	3106.19	2860.58	2940.79	3436.41
VIT_14s0108g01250	38.7452	43.1347	63.5728	35.7314	60.7105	55.8109	59.6515	38.063	50.3939	34.6781	40.6776	65.0642	34.13	40.9239	45.0965	35.2433	46.458	37.5287
VIT_14s0108g01260	62.961	57.5129	38.5722	88.9315	76.0802	61.535	80.6651	66.0717	57.4806	92.8879	83.554	53.2343	57.6679	66.2004	57.3955	65.7875	58.0725	82.1573
VIT_14s0108g01270	32.6913	20.1295	26.4291	30.9672	25.3601	27.1899	24.4029	30.8813	22.8347	21.0546	24.1867	27.2087	11.769	19.2583	31.4309	22.3208	30.1977	28.4001
VIT_14s0108g01280	4976.34	4867.03	6000.84	4691.93	5609.96	5082.37	4353.88	5836.57	5677.98	5367.68	5164.96	6344.35	5327.81	4944.57	5772.35	5695.32	5699.23	6263.23
VIT_14s0108g01290	171.932	179.728	185.004	169.923	192.122	188.898	145.739	188.879	175.591	159.767	171.506	211.754	233.025	164.899	230.948	143.323	157.957	209.958
VIT_14s0108g01320	30.2697	47.4482	13.5717	21.4388	26.897	23.6123	30.5036	27.2905	14.9607	17.3391	16.4909	36.6725	37.6607	25.2765	46.463	22.3208	22.0675	12.1715
VIT_14s0108g01330	794.277	858.381	965.734	756.712	732.368	679.748	808.684	775.624	870.87	698.517	784.968	761.842	716.73	853.384	941.559	864.636	939.612	1003.13
VIT_14s0108g01340	43.5884	53.1995	52.8582	33.3493	66.0899	50.0867	59.6515	62.4808	55.1184	74.3103	60.4667	39.0385	62.3755	49.3494	38.2637	74.0109	63.8797	53.7573
VIT_14s0108g01350	119.868	211.36	180.718	210.418	275.118	223.243	216.915	138.607	180.316	185.776	218.78	269.721	256.563	302.115	312.942	175.042	199.769	164.315
VIT_14s0108g01360	731.316	984.909	893.59	1295.07	740.053	897.267	938.833	811.532	839.374	864.476	817.95	932.192	835.596	860.606	709.244	809.421	717.776	791.145
VIT_14s0108g01370	1087.29	1157.45	1152.88	1055.27	914.5	988.138	1044.58	999.693	1014.18	1029.2	949.877	1062.32	995.654	1172.35	957.958	973.89	1015.11	1067.03
VIT_14s0108g01380	105.339	103.523	95.002	114.341	124.495	103.751	111.169	101.98	97.6382	115.181	109.94	110.018	118.866	116.754	133.923	77.5353	90.593	83.1716
VIT_14s0108g01390	5051.41	4243.02	5135.11	4568.86	5270.28	5659.08	4729.41	5839.44	6000.81	4880.95	5365.05	4453.94	4870	6121.74	4911.41	5381.65	5346.15	5819.98
VIT_14s0108g01420	202.202	196.982	170.004	185.803	292.025	196.769	199.29	208.269	191.339	265.04	208.885	300.478	282.455	211.841	307.476	209.11	271.779	169.386
VIT_14s0108g01430	684.096	716.036	758.587	810.706	570.217	783.499	718.529	657.126	624.412	658.885	727.8	811.528	740.268	743.852	736.575	687.245	653.896	684.644
VIT_14s0108g01440	313.594	370.958	300.006	382.723	358.115	379.943	385.701	346.158	353.545	322.011	374.894	435.339	440.159	359.89	368.971	317.19	347.273	321.529
VIT_14s0108g01450	2836.88	2319.21	2880.77	2283.63	2453.01	2630.27	2453.17	3182.21	3224.42	2919.16	2635.25	1800.5	1891.27	2696.16	1876.29	3107.29	2619.07	3173.71
VIT_14s0108g01460	678.042	787.927	645.728	596.318	663.204	622.506	547.031	655.689	614.176	631.638	644.246	668.387	584.917	645.153	588.987	640.253	631.828	715.073
VIT_14s0108g01470	433.462	481.671	470.01	562.968	435.732	435.038	422.983	407.202	334.647	406.23	490.33	485.024	376.607	474.236	437.299	379.453	370.502	397.601
VIT_14s0108g01480	46.01	66.1399	47.1438	47.6419	49.9517	51.5177	56.2622	42.372	40.1577	69.3563	39.5782	52.0513	40.0145	39.7203	40.9968	29.3694	51.1038	29.4144
VIT_14s0108g01490	73.8581	71.8912	71.4301	65.9046	75.3117	79.4231	65.0744	84.7441	55.9058	58.2097	91.2498	48.5024	57.6679	84.2551	51.9292	98.6813	75.4942	73.0287
VIT_14s0108g01500	1134.51	933.148	1005.74	973.483	2209.4	1305.83	1609.23	1237.41	1242.53	1217.45	1248.91	1232.67	1720.62	1120.59	1257.23	1051.43	1311.28	1134.99
VIT_14s0108g01510	330.545	427.034	322.864	388.281	331.986	319.839	332.15	287.268	280.316	351.735	351.806	261.44	307.17	333.41	336.174	340.685	255.519	327.615
VIT_14s0108g01520	6045.47	5564.38	6172.27	5221.55	5648.38	6240.08	4732.8	6769.47	6533.1	6373.35	5654.19	5306.87	5332.52	5486.21	5478.54	6078.3	5651.61	6482.32
VIT_14s0108g01530	42.3776	33.0699	34.2864	12.7045	45.3407	49.3711	22.3693	40.9357	47.2443	59.4482	43.9758	16.5618	44.722	49.3494	28.6977	45.8163	39.4893	37.5287
VIT_14s0108g01540	256.687	241.554	281.434	185.009	253.601	313.399	226.405	349.749	338.584	252.655	307.831	308.759	238.91	266.005	321.141	270.199	290.362	348.915
VIT_14s0108g01550	610.238	787.927	780.016	696.366	683.953	731.265	716.496	624.09	649.609	679.939	777.272	987.793	797.935	849.773	839.067	646.127	702.677	658.273
VIT_14s0108g01560	431.041	378.148	394.294	269.177	488.758	462.228	442.641	458.911	484.254	386.414	414.472	431.79	524.896	582.564	501.527	432.318	486.647	476.715
VIT_14s0108g01570	299.065	346.515	319.292	363.666	296.636	308.391	298.935	321.022	288.19	315.819	355.105	318.223	287.163	272.024	236.415	330.112	306.623	306.315
VIT_14s0108g01580	213.099	211.36	210.719	151.66	172.141	178.165	173.532	198.215	204.725	220.454	217.68	178.631	162.412	208.23	150.322	175.042	185.832	213
VIT_14s0108g01590	3839.41	3479.53	3770.79	3842.32	3134.66	3337.92	3858.37	3450.09	3090.56	4101.93	3400.43	3446.04	3570.7	3313.63	2964.07	3287.03	2547.06	3033.74
VIT_14s0108g01600	1381.51	1121.5	1160.02	967.924	1202.68	1334.45	1090	1367.4	1183.47	1449.05	1231.32	1119.1	1281.64	1224.11	1071.38	1354.52	994.201	1256.7
VIT_14s0108g01610	1205.95	865.57	937.162	643.165	1037.46	1049.67	833.087	1116.75	1070.87	1127.04	1016.94	794.966	1081.57	1012.26	962.058	1074.92	813.014	1158.32
VIT_14s0108g01620	449.203	276.062	325.721	158.012	321.996	337.727	256.23	332.513	356.694	355.451	290.24	253.159	337.769	326.188	314.309	431.143	325.206	394.558
VIT_14s0108g01650	6746.52	7245.19	7490.16	7891.08	6497.56	7452.9	5961.76	7490.51	7116.57	6588.85	6921.79	6851.85	6564.73	7699.71	6450.16	7012.24	6806.09	7019.89
VIT_14s0108g01660	77.4905	21.5674	47.8581	47.6419	45.3407	38.6383	47.4501	36.6267	44.0947	52.0172	39.5782	23.6597	40.0145	32.4984	49.1961	43.4667	42.9736	43.6144
VIT_14s0108g01680	4615.53	3022.31	3853.65	2841.84	4803.81	5168.94	4016.99	5567.25	5480.34	4442.52	4284.34	3980.74	4179.16	5141.97	4655.87	4915.27	5248.59	6450.87
VIT_18s0122g00010	635.664	497.487	496.439	534.383	647.066	669.015	551.776	616.908	559.845	497.879	595.872	676.667	643.762	562.102	646.382	582.689	642.281	619.73
VIT_18s0122g00040	61.7502	37.3834	61.4299	19.8508	59.1735	65.8282	52.8729	52.4264	62.9924	54.4942	49.4728	52.0513	54.1372	57.7749	53.2958	66.9623	68.5255	58.8287
VIT_18s0122g00050	1633.35	1936.75	1651.46	1374.47	1833.61	1835.32	1898.68	1860.78	1876.39	1876.34	1742.54	1772.11	1697.08	1762.14	1812.06	1844.4	1864.13	1995.1
VIT_18s0122g00070	466.154	677.215	614.299	836.909	515.655	536.643	702.939	536.473	464.569	490.448	548.598	663.655	530.78	541.64	556.19	480.484	486.647	459.472
VIT_18s0122g00080	208.256	205.609	241.434	212.8	224.398	211.08	135.572	197.497	203.15	187.014	203.388	215.303	202.426	231.1	144.855	185.615	175.379	183.586
VIT_18s0122g00090	2003.86	1974.13	2317.19	2133.56	1970.4	2220.27	1748.2	2278.75	2171.66	2132.71	1984.41	2221.65	2305.54	1795.84	2215.19	1890.22	1996.53	2138.12
VIT_18s0122g00110	3985.92	3498.22	4072.23	2872.81	3809.39	4544.29	3585.87	4581.93	4639.39	4153.95	4126.03	3574.98	3657.79	3962.4	3569.45	4378.39	4427.44	5182
VIT_18s0122g00120	2074.08	1364.49	1917.18	1239.48	2644.36	2732.59	1912.24	2741.26	2484.26	2375.45	2330.72	1488.2	2418.52	2134.06	1939.15	2711.39	1997.69	2616.86
VIT_18s0122g00140	817.282	776.425	852.875	898.05	995.191	1003.16	791.06	900.585	765.358	892.962	991.654	1303.65	1253.39	946.065	1190.27	841.14	860.634	871.273
VIT_18s0122g00160	4088.83	2431.36	3737.22	2357.48	4235.13	4715.3	3110.01	4621.42	4973.25	3746.48	3862.18	3696.83	4065	3919.07	4740.59	4467.68	4974.49	5362.54
VIT_18s0122g00180	1208.37	773.549	455.009	561.38	492.6	329.141	763.946	552.991	444.096	631.638	572.785	485.024	555.495	371.926	302.01	555.67	350.758	499.03
VIT_18s0122g00190	759.165	1086.99	750.73	1132.29	745.432	714.808	821.564	666.462	629.137	688.609	810.254	888.422	940.34	724.594	1020.82	716.614	660.865	644.073
VIT_18s0122g00220	1082.45	898.64	996.449	986.981	1037.46	974.543	979.505	1031.29	1040.16	993.281	1009.24	869.494	784.99	1026.71	870.498	970.366	1009.3	1056.89
VIT_18s0122g00230	1145.41	1207.77	1335.74	1002.86	1045.14	1161.3	793.094	1351.6	1163	1429.23	1124.68	1281.17	1179.25	1032.73	1083.68	1167.73	1065.05	1196.86
VIT_18s0122g00240	154.981	139.469	195.718	149.278	153.697	168.148	138.283	158.716	157.481	147.382	184.698	156.154	157.704	196.194	113.424	182.09	216.03	184.6
VIT_18s0122g00260	1554.65	1222.15	1390.03	1232.34	1882.02	2035.67	1456.04	2047.5	1987.41	1696.75	1906.35	1668.01	1727.68	1971.57	1943.25	1886.69	2078.99	2167.53
VIT_18s0122g00300	233.682	115.026	103.574	238.209	223.63	123.786	153.196	201.088	123.623	173.391	146.22	256.708	154.173	125.179	135.289	173.867	77.8171	128.815
VIT_18s0122g00320	1446.89	1184.77	1303.6	1179.14	1258.78	1311.56	1370.63	1047.81	1125.99	1148.09	1333.57	1238.59	1385.21	1344.47	1078.22	1161.85	1324.05	1341.9
VIT_18s0122g00360	47.2208	15.8161	32.8578	37.3195	30.7395	28.621	46.0943	15.7997	28.3466	23.5316	31.8825	16.5618	17.6534	38.5166	15.0322	63.438	39.4893	23.3286
VIT_18s0122g00380	7889.5	5515.49	7620.16	4741.96	6253.18	7492.25	5824.15	8319.28	8464.6	7391.4	7207.64	5344.73	6201.06	7060.58	5820.18	8096.56	7923.41	9347.68
VIT_18s0122g00410	1195.05	1063.99	1300.03	898.844	1082.03	1315.85	1085.25	1302.76	1381.11	1192.68	977.362	1087.16	1201.61	999.025	1115.11	1258.19	1156.8	1256.7
VIT_18s0122g00430	61.7502	61.8264	68.5729	69.8748	51.4886	62.9661	77.9537	39.4994	71.6539	56.9712	73.6595	53.2343	70.6138	71.015	42.3633	58.7388	60.3954	40.5715
VIT_18s0122g00450	30.2697	56.0751	50.7153	15.0866	29.971	12.8794	29.1479	51.7082	40.1577	50.7787	20.8885	13.0128	10.5921	26.4802	15.0322	48.1659	82.4629	27.3858
VIT_18s0122g00460	1002.53	1301.23	953.591	1060.03	1052.83	996.009	1218.11	834.514	911.815	999.474	965.269	1354.52	1373.44	814.867	1238.1	774.178	937.29	781.002
VIT_18s0122g00470	204.623	255.933	184.29	280.293	285.109	252.58	315.204	218.324	205.513	255.132	211.084	431.79	326	201.009	297.91	187.964	225.321	161.272
VIT_18s0122g00480	789.434	773.549	650.014	659.046	700.86	619.644	875.792	674.362	590.554	783.974	836.64	715.706	783.813	645.153	573.955	634.38	675.963	588.287
VIT_18s0122g00490	110.182	112.15	109.288	116.723	96.8294	99.4578	128.793	103.416	97.6382	123.85	109.94	98.1878	117.69	85.4588	84.7267	112.779	92.9159	107.515
VIT_18s0122g00500	13537.8	16631.3	11478.8	15789.3	11867	12313.4	15793.4	12086.1	10947.3	15752.5	13687.5	16256.6	13873.2	13987.6	12976.8	12104.9	11565.7	11489.9
VIT_18s0122g00510	10079.8	9843.34	8823.76	8898.71	7837.8	8956.21	7793.33	7587.47	6511.84	8836.73	9140.37	11232.4	10945.1	9322.23	9110.85	7321.21	8494.84	8220.8
VIT_18s0122g00530	113.814	66.1399	90.0019	78.6091	82.9966	93.7336	75.2422	96.2348	96.0634	63.1638	86.8522	95.8218	84.7365	91.477	91.5595	83.4092	118.468	112.586
VIT_18s0122g00550	131.976	96.3342	113.574	104.018	87.6075	72.2679	147.773	94.0803	95.276	108.988	112.138	115.933	107.098	51.7567	53.2958	71.6614	101.046	95.3431
VIT_18s0122g00560	708.311	674.339	716.443	769.416	702.397	760.602	687.348	700.934	733.074	725.764	721.203	708.608	707.314	693.299	836.334	676.672	816.499	838.816
VIT_18s0122g00590	134.398	176.852	131.431	110.37	149.855	95.8802	136.927	121.371	134.646	115.181	90.1504	115.933	183.596	95.0879	140.756	133.925	168.41	87.2288
VIT_18s0122g00600	797.91	1302.67	807.16	894.079	591.735	610.342	817.497	666.462	572.443	707.186	695.917	582.029	607.278	735.427	534.325	652.001	705	586.259
VIT_18s0122g00610	686.517	871.321	707.872	755.918	1139.67	796.378	1091.35	1020.52	811.027	985.85	842.137	828.09	1085.1	612.655	732.476	1050.25	781.655	670.444
VIT_18s0122g00630	256.687	454.352	249.291	413.69	421.131	238.985	314.526	213.297	224.41	330.681	283.644	738.183	508.419	238.322	591.72	272.548	264.81	186.629
VIT_18s0122g00660	3273.97	2760.62	3333.64	2817.22	3241.48	3845.94	2659.24	3331.59	3596.87	3086.35	3116.79	3170.4	3914.36	2681.72	3666.48	3117.86	3269.48	3351.21
VIT_18s0122g00670	563.017	425.596	432.152	429.571	491.063	417.15	578.891	438.802	391.34	588.29	490.33	532.343	495.473	492.291	430.466	458.163	475.033	531.487
VIT_18s0122g00680	26.6374	31.6321	31.4292	41.2896	35.3504	30.7675	36.6043	25.136	23.6222	35.9166	36.28	46.1364	45.8989	32.4984	24.5981	27.0199	24.3904	18.2572
VIT_18s0122g00700	427.408	327.824	402.151	387.487	411.909	435.038	469.756	387.812	396.065	408.707	423.267	300.478	475.466	436.923	366.238	466.386	457.611	398.615
VIT_18s0122g00710	322.07	284.689	277.863	276.323	318.922	310.537	408.748	263.568	251.182	323.25	306.731	321.772	371.899	267.209	349.839	323.064	312.43	255.601
VIT_18s0122g00770	277.271	382.461	255.72	319.201	248.99	228.968	319.949	285.114	233.072	281.141	266.054	320.589	231.848	228.692	297.91	242.004	272.941	228.215
VIT_18s0122g00780	98.0739	96.3342	102.859	114.341	157.54	81.5697	119.303	132.861	107.087	128.805	144.021	91.0898	125.928	108.328	105.225	192.663	120.791	91.2859
VIT_18s0122g00810	473.418	901.515	389.294	517.709	391.928	333.434	475.856	360.521	325.986	352.974	372.695	502.769	443.69	436.923	364.871	411.172	408.83	306.315
VIT_18s0122g00830	190.094	176.852	190.004	154.042	225.935	218.235	229.794	244.178	212.599	226.646	239.668	184.546	224.787	251.562	188.585	234.955	240.42	183.586
VIT_18s0122g00840	73.8581	63.2642	85.0018	74.639	93.7554	93.0181	72.5308	118.498	120.473	79.2643	82.4546	53.2343	76.4982	109.532	66.9614	132.75	130.082	144.029
VIT_18s0122g00850	3143.21	4112.18	3485.07	3176.13	3519.67	4375.43	3151.36	3827.85	4033.09	3492.58	3376.24	3455.5	3724.88	3708.43	3778.54	3651.21	3291.55	3156.46
VIT_18s0122g00860	180.408	196.982	190.718	242.18	185.205	182.459	208.102	162.306	156.694	189.491	215.481	165.618	191.834	193.787	195.418	218.509	197.446	230.243
VIT_18s0122g00870	2081.35	1880.67	2416.48	2816.43	1761.37	1875.39	2629.41	1839.95	1766.15	2076.97	2292.24	2027.64	1806.54	2078.69	1843.49	1953.65	1980.27	2648.31
VIT_18s0122g00880	316.016	297.629	292.149	378.753	283.572	301.951	332.15	289.423	249.607	271.233	328.719	296.929	241.264	362.297	295.177	233.781	317.076	353.987
VIT_18s0122g00890	3003.97	3419.14	3410.79	3068.14	2930.24	3309.3	3124.25	3236.79	3270.88	3180.48	3153.07	2843.9	2859.86	3436.4	3058.36	3352.81	3259.03	3524.65
VIT_18s0122g00900	41.1668	66.1399	62.1442	52.4061	39.1928	47.2246	70.4972	33.0358	37.008	43.3477	49.4728	67.4301	68.26	44.5348	61.4952	38.7676	38.3278	35.5001
VIT_18s0122g00920	249.422	194.106	242.148	225.505	223.63	219.666	236.572	206.115	248.82	256.371	234.171	154.971	145.935	215.452	176.286	234.955	200.931	204.886
VIT_18s0122g00950	710.733	1030.92	782.873	1015.57	684.722	698.351	707.006	672.925	662.208	746.819	722.303	809.162	746.152	731.816	692.845	690.769	699.192	537.573
VIT_18s0122g00960	1607.93	2573.7	1790.04	1669.85	2788.84	1821.72	2133.22	1576.38	1597.64	1990.28	2032.78	3171.58	3276.48	1599.64	3095.26	1403.86	2116.16	1299.3
VIT_18s0122g00970	892.351	670.026	985.021	852.79	769.256	898.698	819.53	975.275	1112.6	875.623	912.498	642.361	774.397	713.761	755.707	865.811	1001.17	1054.86
VIT_18s0122g00990	277.271	307.694	348.579	326.347	347.356	462.228	321.982	333.231	417.325	251.417	318.825	464.913	555.495	287.671	497.428	353.608	343.789	298.201
VIT_18s0122g01010	2675.84	2793.69	3031.49	2779.11	2445.33	3135.43	2824.63	2802.3	3073.24	2805.21	2561.59	3169.22	2978.72	2499.97	2992.76	2529.29	2822.32	2924.19
VIT_18s0122g01020	332.967	382.461	335.721	340.64	325.07	304.813	401.292	310.249	321.261	299.718	316.626	243.695	300.108	395.999	276.045	285.471	245.066	314.429
VIT_18s0122g01030	863.292	966.217	1075.74	967.924	999.802	1126.95	906.974	1000.41	1157.49	1001.95	1008.15	880.141	917.979	1156.7	962.058	1108.99	1059.24	1128.9
VIT_18s0122g01040	1439.63	1656.37	1493.6	1414.96	1620.74	1554.83	1502.13	1608.7	1674.02	1762.39	1521.56	1380.54	1445.23	1561.13	1417.12	1638.81	1499.43	1399.72
VIT_18s0122g01050	215.52	185.479	164.289	165.159	210.565	173.872	169.464	200.369	183.465	189.491	223.177	145.507	194.188	202.212	162.621	218.509	211.384	219.086
VIT_18s0122g01060	369.291	409.78	340.007	446.246	245.916	324.848	322.66	286.55	289.765	331.919	332.017	249.61	253.033	321.373	207.717	300.743	317.076	345.872
VIT_18s0122g01080	5498.19	4130.87	5607.97	4511.69	5570.76	6332.39	5096.14	5939.99	6223.65	5448.18	5705.86	4985.1	5853.88	5816.01	5280.38	5730.56	5928.04	6346.4
VIT_18s0122g01110	205.834	185.479	232.862	241.386	158.308	178.165	195.901	211.86	174.804	175.868	214.382	179.814	150.643	235.914	150.322	160.944	173.056	219.086
VIT_18s0122g01120	82.3336	119.339	80.716	71.4628	129.106	101.604	89.4772	96.953	119.686	85.4568	106.641	80.443	77.6751	148.048	61.4952	128.051	112.661	107.515
VIT_18s0122g01140	20.5834	60.3886	29.2863	40.4956	48.4147	29.3365	50.8393	21.5451	29.9214	32.2011	42.8764	52.0513	82.3827	24.0729	57.3955	41.1172	45.2965	27.3858
VIT_18s0122g01160	161.035	143.782	153.575	127.839	157.54	92.3026	122.014	109.162	103.15	141.19	116.536	167.984	111.805	99.9025	139.389	149.197	127.759	120.7
VIT_18s0122g01170	173.143	153.847	141.432	190.568	122.958	176.019	139.639	129.989	109.449	153.575	120.933	205.839	127.105	97.4952	180.386	142.148	159.119	134.9
VIT_18s0122g01190	5816.63	7598.9	5226.54	6223.62	4631.67	4811.18	6266.12	4397.36	4494.51	5357.77	5301.28	6035.59	5717.36	5141.97	6022.43	4992.8	5307.82	5083.61
VIT_18s0122g01200	127.133	161.036	134.289	111.164	219.787	223.959	150.484	211.142	230.71	196.922	175.903	123.03	197.719	273.227	185.852	240.829	270.618	187.643
VIT_18s0122g01210	180.408	109.275	112.145	124.663	197.501	150.976	120.659	165.897	150.394	164.721	133.027	132.494	209.487	191.379	181.752	159.77	202.092	164.315
VIT_18s0122g01220	2008.7	1486.71	2005.76	1688.11	1857.43	2017.78	1650.58	1969.22	1982.69	1997.71	1961.32	2097.43	2161.96	1782.6	2052.57	1689.33	1816.51	2098.56
VIT_18s0122g01240	31.4805	7.18912	30.0006	16.6747	19.9807	10.7329	12.8793	30.1631	21.2599	27.2471	17.5903	8.2809	11.769	13.2401	6.8328	24.6703	16.2603	23.3286
VIT_18s0122g01260	107.76	123.653	94.2877	96.0778	101.44	67.2592	79.3094	79.7169	69.2916	107.75	82.4546	60.3322	77.6751	54.164	36.8971	109.254	80.14	86.2145
VIT_18s0122g01270	171.932	228.614	160.003	232.651	218.25	157.415	203.357	187.442	154.331	220.454	208.885	218.852	243.617	142.03	259.646	186.79	168.41	200.829
VIT_18s0122g01280	1093.34	756.295	791.445	489.917	1220.36	959.517	799.872	895.558	841.736	842.183	938.884	630.531	1207.5	995.414	903.296	849.364	1029.04	980.817
VIT_18s0122g01290	2271.44	1659.25	1597.89	1869.94	2569.05	2120.81	2140	2433.88	2089.77	3264.7	2673.73	1938.91	2323.19	1570.76	1813.42	2331.93	1907.1	2439.36
VIT_18s0122g01320	11745.9	10786.6	11446	10857.6	10307.7	10342.9	9387.65	10786.9	10685.9	10289.5	10325.5	9879.11	9929.47	10321.3	7919.21	9674.29	10046.5	10219
VIT_18s0122g01340	1574.03	1332.86	1465.74	1352.24	1268.77	1637.12	1352.33	1314.25	1453.55	1341.3	1292.89	2235.84	1740.63	1066.43	2018.41	1177.13	1487.82	1483.9
VIT_18s0122g01350	187.672	195.544	175.718	249.326	142.939	148.113	166.753	163.025	139.371	158.529	184.698	205.839	156.527	184.158	194.051	132.75	180.025	143.015
VIT_18s0122g01370	2195.16	1706.7	2219.33	1569.8	1954.26	2080.74	2028.15	2261.52	2355.13	2049.73	2044.88	1598.21	1744.16	2413.31	1735.53	2334.28	2135.91	2323.73
VIT_18s0122g01380	277.271	235.803	305.006	250.12	320.459	311.253	239.284	296.604	332.285	340.589	321.023	207.022	282.455	389.981	266.479	390.026	344.95	309.358
VIT_18s0122g01400	301.486	312.008	300.006	301.732	392.697	279.054	317.915	332.513	333.86	312.103	271.551	201.107	302.462	272.024	217.283	371.23	283.394	288.058
VIT_18s0122g01410	1260.43	1229.34	1380.03	1103.7	974.442	1091.89	894.772	1195.04	1180.32	1143.14	1065.31	925.094	925.04	1239.75	889.63	1247.61	1009.3	1261.77
VIT_18s0122g01430	58.1179	43.1347	62.8585	69.8748	82.9966	64.3971	87.4437	66.7898	49.6065	59.4482	51.6716	75.711	52.9603	85.4588	64.2283	44.6415	49.9423	81.143
VIT_18s0122g01440	996.479	1352.99	1157.17	928.223	981.358	1086.17	992.384	988.202	991.343	890.485	866.323	1156.96	1107.46	973.748	1109.65	864.636	896.639	930.102
VIT_18s0122g01470	19.3726	20.1295	13.5717	15.0866	32.2765	20.7502	19.6579	4.30902	11.0237	19.8161	18.6897	56.7833	54.1372	26.4802	19.1318	16.4469	27.8748	10.1429
VIT_18s0001g00050	767.64	976.282	737.158	855.966	593.272	646.118	799.872	619.781	686.617	626.684	746.489	561.918	633.17	718.576	586.254	657.875	629.506	655.23
VIT_18s0001g00060	3692.91	3245.17	3472.93	2882.33	4162.89	3667.06	3829.9	3830	3744.9	3689.51	4022.69	2977.57	3057.58	4742.36	3555.79	4484.12	4440.22	4616.02
VIT_18s0001g00070	1025.54	819.559	1014.31	875.023	1094.33	1179.18	892.061	1177.8	1200.01	917.732	1166.46	1174.7	974.47	1233.74	1147.91	1150.11	1264.82	1403.77
VIT_18s0001g00090	386.242	441.412	482.153	398.604	420.362	341.305	443.997	350.467	349.608	419.853	400.18	403.398	421.329	444.145	427.733	406.473	384.44	410.787
VIT_18s0001g00100	3196.48	2727.55	2854.35	2362.24	3426.68	3228.44	2527.73	3278.45	3159.07	3330.34	3231.12	3296.98	3239.99	3880.55	3156.75	3242.38	3168.43	3434.38
VIT_18s0001g00110	313.594	273.186	285.006	242.18	292.025	304.098	238.606	258.541	288.19	242.747	313.328	333.602	300.108	304.522	304.743	292.519	310.107	348.915
VIT_18s0001g00120	1696.32	1831.79	1710.75	1692.08	1336.4	1506.89	1531.28	1528.27	1533.08	1570.42	1651.29	1474	1368.73	1787.41	1344.69	1624.72	1504.08	1725.3
VIT_18s0001g00130	1565.55	1863.42	1425.03	1850.09	2021.89	1416.02	2073.57	1337.95	1157.49	1653.4	1534.76	3223.63	2498.55	979.767	2536.33	1448.5	1528.47	1112.67
VIT_18s0001g00140	70.2258	93.4585	47.1438	67.4927	40.7298	32.1986	58.9736	38.7812	56.6932	42.1092	30.7831	97.0048	77.6751	38.5166	35.5305	36.4181	52.2652	35.5001
VIT_18s0001g00170	184.04	251.619	220.005	197.714	187.511	225.39	273.177	212.578	193.702	194.445	157.214	248.427	269.509	176.936	221.383	200.887	224.16	175.472
VIT_18s0001g00180	4889.17	4891.48	4600.1	4564.09	4831.48	4962.87	4381.67	4881.4	4732.3	5079.11	4687.82	5754.04	5236.01	4749.58	5206.59	4477.08	4342.66	4761.07
VIT_18s0001g00190	5006.61	4094.92	4992.96	3760.53	6472.2	4655.2	4740.94	4946.04	4426	4942.87	5483.78	5699.62	5164.22	5415.2	6543.09	4861.23	6200.98	5009.57
VIT_18s0001g00210	19.3726	27.3186	33.5721	30.9672	35.3504	20.0347	25.0807	15.0816	34.6458	24.7701	23.0873	89.9069	44.722	18.0547	45.0965	27.0199	13.9374	14.2
VIT_18s0001g00220	82.3336	135.155	79.2874	72.2569	105.283	75.8455	99.6451	61.7626	48.8191	75.5488	65.9637	147.873	77.6751	68.6077	92.926	59.9136	53.4267	68.9716
VIT_18s0001g00230	813.65	1183.33	857.161	996.51	740.053	774.912	924.598	693.034	808.665	941.264	738.794	936.924	801.466	802.831	836.334	749.508	731.713	690.73
VIT_18s0001g00290	510.953	717.474	486.439	676.515	766.95	528.772	550.421	583.154	555.121	718.333	440.857	1081.25	1118.05	359.89	960.691	542.747	699.192	510.187
VIT_18s0001g00320	457.678	566.502	557.869	655.87	516.423	517.324	475.178	558.736	462.207	452.054	476.038	653.008	501.358	595.804	616.318	500.455	530.782	517.287
VIT_18s0001g00330	462.521	465.855	388.58	404.956	391.16	462.228	381.634	485.483	502.364	433.477	413.373	266.172	420.152	444.145	394.936	465.212	463.418	499.03
VIT_18s0001g00360	133874	190141	128491	121752	123321	132214	126357	123380	120071	144765	125930	155143	153591	137697	150019	129076	118981	125148
VIT_18s0001g00370	19.3726	25.8808	22.8576	32.5553	36.8874	11.4484	29.1479	24.4178	19.6851	18.5776	31.8825	30.7576	29.4224	25.2765	23.2315	21.146	16.2603	18.2572
VIT_18s0001g00380	138.03	156.723	125.003	118.311	197.501	113.768	145.062	129.271	137.796	126.328	152.816	179.814	160.058	116.754	168.087	171.517	152.15	136.929
VIT_18s0001g00440	293.011	342.202	301.435	323.965	414.215	322.701	412.138	279.368	261.418	309.626	337.514	397.483	371.899	349.057	368.971	323.064	313.591	336.744
VIT_18s0001g00460	117.447	115.026	95.7163	182.627	134.485	116.63	126.082	115.625	94.4886	91.6494	120.933	153.788	123.574	92.6806	98.3923	113.953	102.208	93.3145
VIT_18s0001g00470	35.1129	23.0052	38.5722	39.7016	53.7941	46.509	19.6579	44.5265	30.7088	60.6867	38.4788	75.711	57.6679	36.1093	47.8296	29.3694	34.8435	21.3
VIT_18s0001g00480	6897.86	6875.67	6509.42	5387.5	6276.23	6657.23	7901.11	6750.8	6599.24	6897.23	7054.82	5777.7	5871.53	7758.69	6201.45	7058.06	6585.42	7048.29
VIT_18s0001g00490	1827.08	1946.81	1943.61	2229.64	2059.55	2138.7	1885.12	1796.14	1933.87	1764.87	1837.09	2712.58	2360.85	1848.8	2693.49	1770.39	1868.77	2025.53
VIT_18s0001g00500	207.045	140.907	172.861	145.308	191.353	203.209	212.847	211.142	174.804	156.052	167.108	182.18	143.581	188.972	150.322	152.721	170.733	196.772
VIT_18s0001g00510	556.963	841.127	516.439	529.619	653.214	600.324	593.126	525.701	649.609	554.85	557.393	727.536	627.286	588.582	992.122	722.488	627.183	549.744
VIT_18s0001g00550	8.47552	8.62694	13.5717	20.6448	19.9807	15.026	16.9464	17.9543	29.134	16.1006	27.4849	20.1107	17.6534	25.2765	17.7653	42.292	20.9061	16.2286
VIT_18s0001g00560	1187.78	1286.85	1173.6	1548.36	1042.84	1270.77	1204.55	1191.44	1158.27	1135.71	1086.2	1214.93	1180.43	1267.44	1272.27	1178.3	1259.01	1078.19
VIT_18s0001g00570	76.2797	57.5129	68.5729	60.3464	74.5432	87.2939	62.3629	96.953	87.402	70.5948	84.6534	41.4045	44.722	75.8296	53.2958	76.3605	72.0099	94.3288
VIT_18s0001g00580	445.57	474.482	534.297	438.305	482.61	508.737	429.762	513.492	511.813	505.31	529.908	448.351	431.921	541.64	388.103	542.747	488.97	512.215
VIT_18s0001g00600	30.2697	56.0751	30.7149	38.1135	54.5626	40.0693	51.5172	38.063	28.3466	52.0172	47.274	35.4896	40.0145	26.4802	30.0643	42.292	30.1977	34.4858
VIT_18s0001g00610	249.422	255.933	152.146	168.335	139.865	141.674	168.109	81.1532	111.812	174.629	197.891	236.597	270.686	123.975	176.286	109.254	146.343	135.915
VIT_18s0001g00640	50.8531	47.4482	57.8583	27.7911	58.405	64.3971	63.0408	58.1718	71.6539	32.2011	71.4607	43.7704	24.7148	57.7749	47.8296	76.3605	69.687	45.643
VIT_18s0001g00650	9.68631	24.443	9.28591	15.0866	14.6013	7.87076	9.49001	7.89987	18.1103	7.43103	25.2861	8.2809	5.88448	18.0547	19.1318	12.9225	13.9374	18.2572
VIT_18s0001g00660	41.1668	25.8808	51.4296	41.2896	44.5722	30.052	50.1615	58.89	48.8191	38.3937	46.1746	49.6854	21.1841	43.3312	35.5305	75.1857	44.1351	77.0859
VIT_18s0001g00670	203.413	237.241	149.289	219.153	193.659	148.113	167.431	146.507	111.812	193.207	179.201	126.579	152.996	167.307	105.225	153.896	137.051	118.672
VIT_18s0001g00690	457.678	802.306	517.154	751.948	686.259	616.066	818.174	553.709	560.632	667.554	499.125	689.68	556.672	649.968	632.717	521.601	457.611	368.187
VIT_18s0001g00700	81.1229	34.5078	49.2867	54.7882	118.347	85.8629	104.39	89.0531	62.205	79.2643	68.1625	47.3194	90.621	89.0697	46.463	70.4866	26.7133	75.0573
VIT_18s0001g00740	196.148	33.0699	245.005	80.9912	53.7941	74.4145	58.9736	187.442	150.394	112.704	104.443	69.7961	95.3286	73.4223	53.2958	143.323	178.863	376.301
VIT_18s0001g00750	2829.61	2848.33	2354.33	2720.35	1936.59	2251.04	2794.13	2145.89	2129.93	2635.54	2386.79	2419.2	2271.41	2412.1	2040.27	2147.49	2243.92	2459.65
VIT_18s0001g00760	339.021	447.163	378.579	408.926	480.304	398.547	407.393	340.413	356.694	371.551	379.291	690.863	549.61	302.115	661.415	283.121	319.399	255.601
VIT_18s0001g00770	351.129	224.3	316.435	236.621	365.031	374.219	268.432	420.13	354.332	431	278.147	320.589	389.553	197.398	353.939	316.015	282.232	322.544
VIT_18s0001g00800	13.3187	15.8161	17.8575	15.0866	24.5916	10.7329	19.6579	19.3906	21.2599	13.6236	5.49698	17.7448	10.5921	15.6474	5.46624	23.4955	31.3591	15.2143
VIT_18s0001g00810	1574.03	2573.7	1862.18	2495.64	1452.44	1843.9	1556.36	1564.89	1385.83	1719.04	1286.29	2933.8	2356.15	1342.06	2392.85	1439.1	1376.32	1109.63
VIT_18s0001g00820	36.3237	27.3186	24.2862	23.8209	40.7298	35.0607	36.6043	22.9814	28.3466	23.5316	46.1746	35.4896	42.3683	25.2765	32.7974	50.5154	32.5206	12.1715
VIT_18s0001g00840	1465.05	1676.5	1520.75	1025.09	1038.99	584.583	1923.08	1164.87	1454.34	1067.59	1190.65	710.974	735.56	670.43	602.653	1442.63	1457.62	1432.17
VIT_18s0001g00860	14843.1	9748.44	15833.2	9307.64	16939	15721.5	8381.03	17708.6	17566.2	12995.6	15591.6	14133.1	14341.7	17889.8	14957	17108.3	18083.8	19883.1
VIT_18s0001g00870	88.3876	135.155	65.0014	112.752	86.0705	70.8369	113.202	72.5352	84.2523	84.2183	92.3492	112.384	94.1517	80.6442	113.424	84.5839	66.2026	49.7001
VIT_18s0001g00890	234.893	245.868	250.72	234.239	195.196	206.786	206.069	254.95	251.97	226.646	234.171	165.618	140.051	246.747	154.421	260.8	249.712	259.658
VIT_18s0001g00900	400.771	566.502	414.294	551.852	361.957	389.96	469.078	344.722	340.159	463.201	414.472	567.833	406.029	465.81	318.408	402.949	371.664	361.087
VIT_18s0001g00910	236.104	207.047	187.147	155.63	258.98	265.459	149.129	274.341	307.088	261.325	244.066	167.984	244.794	258.784	291.077	227.907	298.492	272.843
VIT_18s0001g00950	2066.82	1463.7	1510.75	1313.33	1214.98	1244.3	1449.94	1326.46	1192.92	1501.07	1660.09	1057.59	1387.56	1308.36	1015.35	1305.18	1514.53	1815.58
VIT_18s0001g00960	215.52	224.3	224.29	271.559	208.26	254.726	192.512	242.023	273.23	217.977	205.587	228.316	198.895	246.747	255.547	296.044	276.425	246.472
VIT_18s0001g00980	56.9071	23.0052	42.1437	53.2001	38.4244	30.7675	43.3829	43.8084	51.9687	42.1092	53.8704	37.8555	47.0758	46.9421	43.7299	23.4955	52.2652	42.6001
VIT_18s0001g00990	865.714	983.471	757.159	821.823	691.638	1051.1	900.195	782.087	900.004	842.183	762.98	688.497	804.997	849.773	739.308	690.769	679.448	660.302
VIT_18s0001g01020	4104.57	3866.31	4904.39	3626.34	3386.72	4416.21	3462.5	4450.5	4393.72	3658.54	4047.97	2836.8	3287.07	4536.54	3110.29	4131.69	3885.05	4216.4
VIT_18s0001g01030	2163.68	3081.26	2086.47	2736.23	1977.32	1966.26	2531.12	2064.74	2094.5	2303.62	2045.97	1862.02	2200.8	2226.74	1693.17	2328.41	1894.32	1664.45
VIT_18s0001g01060	3781.29	4004.34	3517.22	3839.94	2885.67	2810.58	3175.09	3282.04	2496.07	3257.27	4083.15	2370.7	2695.09	3354.56	1794.29	3101.41	2797.93	3125.02
VIT_18s0001g01070	48.4316	76.2046	69.2872	30.9672	76.8487	84.4318	90.1551	72.5352	86.6146	60.6867	83.554	59.1493	57.6679	87.866	69.6945	98.6813	106.853	69.9859
VIT_18s0001g01080	648.983	1285.41	710.729	1074.32	703.934	691.196	716.496	542.937	570.869	688.609	666.234	933.375	868.549	603.026	763.907	555.67	542.397	405.715
VIT_18s0001g01090	5159.17	5371.71	4627.95	3757.36	4211.31	4489.2	4349.14	4332	4468.52	4661.73	4714.21	4845.51	4206.23	4894.02	4439.95	4821.28	4895.51	4846.27
VIT_18s0001g01110	606.605	754.857	715.729	653.488	700.092	579.574	713.106	581	596.066	635.353	568.387	1001.99	717.906	684.874	992.122	727.187	753.781	621.759
VIT_18s0001g01120	2851.41	3111.45	2677.91	2675.89	2772.7	2787.68	2453.17	2454.71	2456.7	2869.62	2836.44	2995.32	2917.52	2702.18	2737.22	2431.79	2516.86	2461.68
VIT_18s0001g01130	7200.56	21800.3	10405.2	10817.9	11544.2	10943.9	7552.69	8412.64	8582.71	8548.16	8972.16	13681.2	16740.2	8873.27	13688.8	9111.57	9822.38	5499.47
VIT_18s0001g01140	15.7403	66.1399	38.5722	83.3733	80.6911	74.4145	55.5843	41.6539	37.008	55.7327	30.7831	145.507	144.758	26.4802	102.492	42.292	58.0725	21.3
VIT_18s0001g01180	6768.31	6869.92	7620.16	6179.15	7178.44	7661.11	6358.98	7863.96	8029.17	7153.6	7595.72	6993.81	7101.39	7469.82	6871.06	7745.3	7178.92	7863.78
VIT_18s0001g01270	9078.49	7883.59	9695.2	6785	8834.53	9538.65	7162.25	10216.7	9896.11	8972.97	8849.03	6718.17	7337.95	10277.9	7578.94	9513.34	9047.69	10716
[truncated: 16,761 more rows]

## Sheet: Table_S5
Table S5. List of significantly DEGs in the different treated samples: Fosetyl-al, potassium phosphonate, metiram, laminarin, H20.
[truncated: 319 more rows]

[truncated: 4 more sheets: Table_S6, Table_S7, Table_S8, Table_S9]
